# Supplementary material for: HoxB-derived hoxba and hoxbb clusters are essential for the anterior–posterior positioning of zebrafish pectoral fins
Source: eLife. 2025 Nov 21;14:RP105889. doi: 10.7554/eLife.105889 (PMC12638046; doi:10.7554/eLife.105889)
Supplement: Figure 5—figure supplement 1—source data 1. [file elife-105889-fig5-figsupp1-data1.xlsx]

## Sheet: all.fpkm_anno
gene_id	Exonic.gene.sizes	Raldh2-1	Raldh2-1_FPKM	Raldh2-2	Raldh2-2_FPKM	Sibling-1	Sibling-1_FPKM	Sibling-2	Sibling-2_FPKM	Chr	Start	End	Strand	GeneSymbol	Description	GO_BP	GO_CC	GO_MF
ENSDARG00000000001	2476	76	2.12	69	2	62	1.56	79	1.77	9	34112067	34121839	-	slc35a5	solute carrier family 35 member A5 [Source:NCBI gene%3BAcc:368418]	GO:0008643:carbohydrate transport;	GO:0000139:Golgi membrane;GO:0016021:integral component of membrane;	GO:0005351:sugar:proton symporter activity;
ENSDARG00000000002	2604	119	3.16	122	3.37	132	3.16	169	3.61	9	34089156	34113209	+	ccdc80	coiled-coil domain containing 80 [Source:NCBI gene%3BAcc:368419]	-	GO:0005578:proteinaceous extracellular matrix;	-
ENSDARG00000000018	3013	762	17.5	671	16	760	15.72	920	16.98	4	15081385	15103696	-	nrf1	nuclear respiratory factor 1 [Source:NCBI gene%3BAcc:64604]	GO:0006355:regulation of transcription, DNA-templated;GO:0009409:response to cold;GO:0060041:retina development in camera-type eye;	GO:0005634:nucleus;	GO:0003677:DNA binding;
ENSDARG00000000019	2758	1529	38.35	1472	38.34	1789	40.43	2022	40.78	4	15011341	15059876	+	ube2h	ubiquitin-conjugating enzyme E2H (UBC8 homolog%2C yeast) [Source:ZFIN%3BAcc:ZDB-GENE-030616-67]	-	-	GO:0016881:acid-amino acid ligase activity;
ENSDARG00000000068	2397	319	9.21	295	8.84	366	9.52	387	8.98	12	33484458	33537126	+	slc9a3r1a	SLC9A3 regulator 1a [Source:ZFIN%3BAcc:ZDB-GENE-031006-7]	GO:0055078:sodium ion homeostasis;GO:0043113:receptor clustering;GO:0006612:protein targeting to membrane;	GO:0005622:intracellular;	-
ENSDARG00000000069	2290	1461	44.14	1401	43.94	1554	42.3	1750	42.51	24	22070290	22103585	-	dap	death-associated protein [Source:ZFIN%3BAcc:ZDB-GENE-000511-3]	-	-	-
ENSDARG00000000086	6364	991	10.77	813	9.18	949	9.3	1310	11.45	1	46999441	47089818	-	itsn1	intersectin 1 (SH3 domain protein) [Source:ZFIN%3BAcc:ZDB-GENE-030616-226]	GO:0035023:regulation of Rho protein signal transduction;GO:0006897:endocytosis;	GO:0005622:intracellular;	GO:0005089:Rho guanyl-nucleotide exchange factor activity;GO:0005543:phospholipid binding;GO:0005509:calcium ion binding;GO:0032947:protein complex scaffold;
ENSDARG00000000103	7721	5766	51.66	5283	49.15	6204	50.09	8111	58.43	6	7553085	7658285	+	myh10	myosin%2C heavy chain 10%2C non-muscle [Source:ZFIN%3BAcc:ZDB-GENE-030616-162]	-	-	-
ENSDARG00000000142	1398	50	2.47	49	2.52	78	3.48	46	1.83	10	13279079	13287169	+	tmem267	transmembrane protein 267 [Source:NCBI gene%3BAcc:368645]	-	GO:0016021:integral component of membrane;	-
ENSDARG00000000151	2720	58	1.48	46	1.21	50	1.15	86	1.76	3	34688022	34753605	-	thraa	thyroid hormone receptor alpha a [Source:NCBI gene%3BAcc:30670]	GO:0043401:steroid hormone mediated signaling pathway;GO:0045944:positive regulation of transcription from RNA polymerase II promoter;GO:0000122:negative regulation of transcription from RNA polymerase II promoter;GO:0007275:multicellular organismal development;	GO:0005634:nucleus;	GO:0008270:zinc ion binding;GO:0004887:thyroid hormone receptor activity;GO:0043565:sequence-specific DNA binding;GO:0005515:protein binding;GO:0003707:steroid hormone receptor activity;GO:0000988:protein binding transcription factor activity;
ENSDARG00000000161	5735	63	0.76	64	0.8	74	0.8	92	0.89	20	25359064	25436389	-	itsn2a	intersectin 2a [Source:ZFIN%3BAcc:ZDB-GENE-041014-84]	GO:0035023:regulation of Rho protein signal transduction;GO:0006897:endocytosis;	GO:0005622:intracellular;	GO:0005089:Rho guanyl-nucleotide exchange factor activity;GO:0005543:phospholipid binding;GO:0005509:calcium ion binding;
ENSDARG00000000175	1832	248	9.36	223	8.74	312	10.62	298	9.05	3	23752150	23754831	+	hoxb2a	homeobox B2a [Source:NCBI gene%3BAcc:30338]	GO:0007275:multicellular organismal development;GO:0006355:regulation of transcription, DNA-templated;	GO:0005634:nucleus;	GO:0003700:sequence-specific DNA binding transcription factor activity;GO:0043565:sequence-specific DNA binding;
ENSDARG00000000183	6573	337	3.55	359	3.92	416	3.95	477	4.04	22	11778053	11833334	-	ptpn4b	protein tyrosine phosphatase non-receptor type 4b [Source:ZFIN%3BAcc:ZDB-GENE-030131-6259]	-	-	-
ENSDARG00000000189	7536	241	2.21	194	1.85	307	2.54	307	2.27	16	30002605	30271444	+	sema6e	sema domain%2C transmembrane domain (TM)%2C and cytoplasmic domain%2C (semaphorin) 6E [Source:ZFIN%3BAcc:ZDB-GENE-040724-119]	GO:0007275:multicellular organismal development;	GO:0016021:integral component of membrane;	GO:0004872:receptor activity;GO:0045499:chemorepellent activity;
ENSDARG00000000212	1503	3327	153.13	3199	152.88	3388	140.51	3702	137	22	11756040	11759106	+	krt97	keratin 97 [Source:ZFIN%3BAcc:ZDB-GENE-040718-78]	-	GO:0005882:intermediate filament;	GO:0005198:structural molecule activity;
ENSDARG00000000229	5353	234	3.02	248	3.33	231	2.69	213	2.21	22	567733	584610	+	usp49	ubiquitin specific peptidase 49 [Source:ZFIN%3BAcc:ZDB-GENE-050208-484]	GO:0006511:ubiquitin-dependent protein catabolic process;	-	GO:0008270:zinc ion binding;GO:0008234:cysteine-type peptidase activity;
ENSDARG00000000241	3780	1396	25.55	1323	25.14	1457	24.03	1644	24.19	9	41103127	41113878	+	slc40a1	solute carrier family 40 member 1 [Source:NCBI gene%3BAcc:58153]	-	-	-
ENSDARG00000000324	1824	211	8	169	6.66	171	5.84	307	9.36	2	38002717	38020603	+	dcaf8	DDB1 and CUL4 associated factor 8 [Source:ZFIN%3BAcc:ZDB-GENE-070912-578]	-	-	-
ENSDARG00000000349	1223	26	1.47	33	1.94	45	2.29	36	1.64	21	22828500	22832715	+	cfap300	cilia and flagella associated protein 300 [Source:ZFIN%3BAcc:ZDB-GENE-040724-203]	-	-	-
ENSDARG00000000369	1361	75	3.81	74	3.91	91	4.17	106	4.33	9	14090329	14108896	-	prkag3b	protein kinase%2C AMP-activated%2C gamma 3b non-catalytic subunit [Source:ZFIN%3BAcc:ZDB-GENE-060421-6938]	-	-	-
ENSDARG00000000370	8958	702	5.42	599	4.8	707	4.92	901	5.59	16	8751815	8927425	-	triob	trio Rho guanine nucleotide exchange factor b [Source:ZFIN%3BAcc:ZDB-GENE-030616-399]	-	-	-
ENSDARG00000000380	3984	18	0.31	16	0.29	21	0.33	35	0.49	14	25005403	25035010	-	pde6a	phosphodiesterase 6A%2C cGMP-specific%2C rod%2C alpha [Source:ZFIN%3BAcc:ZDB-GENE-030616-42]	GO:0007165:signal transduction;	-	GO:0046872:metal ion binding;GO:0004114:3',5'-cyclic-nucleotide phosphodiesterase activity;
ENSDARG00000000394	3991	3177	55.07	3144	56.58	3576	55.85	4300	59.93	14	25079782	25099988	-	matr3l1.1	matrin 3-like 1.1 [Source:ZFIN%3BAcc:ZDB-GENE-030616-40]	-	-	-
ENSDARG00000000423	1958	135	4.77	124	4.55	141	4.49	195	5.54	7	32629674	32645200	+	si:ch73-314g15.3	si:ch73-314g15.3 [Source:ZFIN%3BAcc:ZDB-GENE-030616-19]	GO:0055114:oxidation-reduction process;	-	GO:0051537:2 iron, 2 sulfur cluster binding;GO:0016491:oxidoreductase activity;GO:0046914:transition metal ion binding;
ENSDARG00000000442	3061	714	16.14	669	15.7	735	14.97	731	13.28	7	32693890	32716019	+	slc39a13	solute carrier family 39 member 13 [Source:NCBI gene%3BAcc:368686]	GO:0006829:zinc II ion transport;GO:0055085:transmembrane transport;	GO:0000139:Golgi membrane;GO:0016021:integral component of membrane;	GO:0005385:zinc ion transmembrane transporter activity;
ENSDARG00000000460	942	0	0	0	0	0	0	0	0	7	17443567	17446703	+	nitr2b	novel immune-type receptor 2b [Source:ZFIN%3BAcc:ZDB-GENE-001106-6]	-	-	-
ENSDARG00000000472	3357	240	4.95	196	4.19	286	5.31	326	5.4	11	23933016	23987682	+	cntn2	contactin 2 [Source:ZFIN%3BAcc:ZDB-GENE-990630-12]	GO:0001764:neuron migration;GO:0007417:central nervous system development;GO:0045773:positive regulation of axon extension;	-	-
ENSDARG00000000474	546	0	0	1	0.13	0	0	3	0.31	23	5723090	5729484	-	tnni1a	troponin I type 1a (skeletal%2C slow) [Source:ZFIN%3BAcc:ZDB-GENE-030616-266]	-	GO:0005861:troponin complex;	-
ENSDARG00000000476	3036	185	4.22	138	3.26	208	4.27	233	4.27	9	40948569	41025062	-	pms1	PMS1 homolog 1%2C mismatch repair system component [Source:ZFIN%3BAcc:ZDB-GENE-030616-528]	-	-	-
ENSDARG00000000489	2580	927	24.86	815	22.69	1006	24.31	1022	22.03	14	33339322	33351103	-	upf3b	UPF3B regulator of nonsense mediated mRNA decay [Source:ZFIN%3BAcc:ZDB-GENE-040426-1630]	-	-	GO:0000166:nucleotide binding;
ENSDARG00000000503	6827	508	5.15	482	5.07	694	6.34	836	6.81	19	5158306	5254699	-	stx1b	syntaxin 1B [Source:ZFIN%3BAcc:ZDB-GENE-000330-4]	GO:0007268:synaptic transmission;GO:0016192:vesicle-mediated transport;GO:0006886:intracellular protein transport;	GO:0016020:membrane;	GO:0005484:SNAP receptor activity;
ENSDARG00000000516	4335	9	0.14	17	0.28	17	0.24	38	0.49	9	41045874	41077934	-	ankar	ankyrin and armadillo repeat containing [Source:ZFIN%3BAcc:ZDB-GENE-030616-533]	-	-	-
ENSDARG00000000529	2951	310	7.27	276	6.72	311	6.57	413	7.78	9	54716436	54743987	+	ofd1	OFD1 centriole and centriolar satellite protein [Source:NCBI gene%3BAcc:327216]	-	-	-
ENSDARG00000000540	6343	604	6.59	573	6.49	677	6.65	689	6.04	9	41079669	41090343	-	asdurf	asnsd1 upstream reading frame [Source:ZFIN%3BAcc:ZDB-GENE-170731-1]	GO:0006541:glutamine metabolic process;GO:0006529:asparagine biosynthetic process;	-	GO:0004066:asparagine synthase (glutamine-hydrolyzing) activity;
ENSDARG00000000542	6403	606	6.55	680	7.63	662	6.44	822	7.14	9	27688274	27720612	-	gtf2e1	general transcription factor IIE%2C polypeptide 1%2C alpha [Source:ZFIN%3BAcc:ZDB-GENE-041210-221]	GO:0006367:transcription initiation from RNA polymerase II promoter;GO:0006355:regulation of transcription, DNA-templated;	-	GO:0043565:sequence-specific DNA binding;GO:0008270:zinc ion binding;
ENSDARG00000000551	4957	900	12.56	855	12.39	1053	13.24	1098	12.32	13	24429918	24448278	-	slc1a4	solute carrier family 1 member 4 [Source:ZFIN%3BAcc:ZDB-GENE-030616-566]	-	-	-
ENSDARG00000000563	88557	13098	10.23	11744	9.53	16303	11.48	21531	13.52	9	42732992	42873700	-	ttn.1	titin%2C tandem duplicate 1 [Source:ZFIN%3BAcc:ZDB-GENE-030616-413]	GO:0055085:transmembrane transport;GO:0006468:protein phosphorylation;GO:0014866:skeletal myofibril assembly;GO:0035023:regulation of Rho protein signal transduction;	GO:0016021:integral component of membrane;GO:0005622:intracellular;	GO:0005089:Rho guanyl-nucleotide exchange factor activity;GO:0003676:nucleic acid binding;GO:0042626:ATPase activity, coupled to transmembrane movement of substances;GO:0004713:protein tyrosine kinase activity;GO:0005524:ATP binding;
ENSDARG00000000567	5617	1240	15.27	1170	14.96	1322	14.67	1641	16.25	3	38762891	38783951	-	znf281a	zinc finger protein 281a [Source:ZFIN%3BAcc:ZDB-GENE-131126-34]	-	-	-
ENSDARG00000000568	4151	562	9.37	517	8.95	534	8.02	658	8.82	22	20847580	20924747	-	ell	elongation factor RNA polymerase II [Source:ZFIN%3BAcc:ZDB-GENE-030131-3946]	GO:0001570:vasculogenesis;GO:0006414:translational elongation;GO:0006368:transcription elongation from RNA polymerase II promoter;	GO:0008023:transcription elongation factor complex;	GO:0003746:translation elongation factor activity;
ENSDARG00000000588	2429	306	8.72	289	8.55	325	8.34	361	8.27	23	32199588	32236122	-	grasp	GRP1 (general receptor for phosphoinositides 1)-associated scaffold protein [Source:ZFIN%3BAcc:ZDB-GENE-060312-30]	-	-	-
ENSDARG00000000606	12816	116	0.63	119	0.67	123	0.6	158	0.69	1	22002649	22235421	+	dnah6	dynein%2C axonemal%2C heavy chain 6 [Source:ZFIN%3BAcc:ZDB-GENE-030616-623]	-	-	-
ENSDARG00000000631	6116	1013	11.46	903	10.61	1126	11.48	1189	10.81	9	28939912	29029980	-	ptpn4a	protein tyrosine phosphatase non-receptor type 4a [Source:ZFIN%3BAcc:ZDB-GENE-030616-449]	GO:0006470:protein dephosphorylation;GO:0035335:peptidyl-tyrosine dephosphorylation;	GO:0005856:cytoskeleton;	GO:0004725:protein tyrosine phosphatase activity;GO:0008092:cytoskeletal protein binding;
ENSDARG00000000638	1379	0	0	0	0	0	0	0	0	6	41200500	41202554	+	opn1mw4	opsin 1 (cone pigments)%2C medium-wave-sensitive%2C 4 [Source:NCBI gene%3BAcc:30504]	GO:0007602:phototransduction;GO:0018298:protein-chromophore linkage;GO:0007186:G-protein coupled receptor signaling pathway;GO:0007601:visual perception;	GO:0016021:integral component of membrane;	GO:0004930:G-protein coupled receptor activity;GO:0009881:photoreceptor activity;
ENSDARG00000000651	1386	67	3.34	71	3.68	84	3.78	104	4.17	9	41040294	41045873	+	osgepl1	O-sialoglycoprotein endopeptidase-like 1 [Source:NCBI gene%3BAcc:368635]	-	-	-
ENSDARG00000000656	1153	0	0	2	0.12	0	0	0	0	19	7120380	7122373	+	psmb9a	proteasome 20S subunit beta 9a [Source:ZFIN%3BAcc:ZDB-GENE-990415-140]	GO:0051603:proteolysis involved in cellular protein catabolic process;	GO:0005737:cytoplasm;GO:0005839:proteasome core complex;GO:0005634:nucleus;	GO:0004298:threonine-type endopeptidase activity;
ENSDARG00000000666	2321	210	6.26	226	6.99	214	5.75	220	5.27	9	7228083	7238839	-	creg2	cellular repressor of E1A-stimulated genes 2 [Source:ZFIN%3BAcc:ZDB-GENE-041114-173]	GO:0055114:oxidation-reduction process;	-	GO:0016491:oxidoreductase activity;GO:0010181:FMN binding;
ENSDARG00000000690	1966	447	15.73	375	13.7	457	14.49	515	14.57	8	25079470	25090458	+	sypl2b	synaptophysin-like 2b [Source:ZFIN%3BAcc:ZDB-GENE-050417-309]	-	-	-
ENSDARG00000000729	3191	667	14.46	649	14.61	808	15.78	977	17.03	19	7014455	7033670	-	daxx	death-domain associated protein [Source:ZFIN%3BAcc:ZDB-GENE-010110-3]	GO:0045892:negative regulation of transcription, DNA-templated;	GO:0016605:PML body;	-
ENSDARG00000000730	2752	134	3.37	110	2.87	102	2.31	131	2.65	6	41118910	41138855	-	slc6a22.1	solute carrier family 6 member 22%2C tandem duplicate 1 [Source:ZFIN%3BAcc:ZDB-GENE-030616-629]	GO:0006836:neurotransmitter transport;	GO:0016021:integral component of membrane;	GO:0005328:neurotransmitter:sodium symporter activity;
ENSDARG00000000747	2798	119	2.94	144	3.7	130	2.9	170	3.38	9	27720267	27734078	+	lcmt2	leucine carboxyl methyltransferase 2 [Source:ZFIN%3BAcc:ZDB-GENE-110714-2]	GO:0032259:methylation;	-	GO:0008168:methyltransferase activity;
ENSDARG00000000760	951	140	10.18	117	8.84	119	7.8	150	8.77	13	24665334	24669258	-	znf511	zinc finger protein 511 [Source:NCBI gene%3BAcc:368916]	GO:0006355:regulation of transcription, DNA-templated;	GO:0005634:nucleus;	GO:0003677:DNA binding;GO:0008270:zinc ion binding;
ENSDARG00000000767	2475	46	1.29	55	1.6	38	0.96	37	0.83	7	32644673	32659353	-	spi1b	Spi-1 proto-oncogene b [Source:ZFIN%3BAcc:ZDB-GENE-980526-164]	GO:0045647:negative regulation of erythrocyte differentiation;GO:0006355:regulation of transcription, DNA-templated;GO:0048821:erythrocyte development;GO:0010628:positive regulation of gene expression;GO:0030225:macrophage differentiation;GO:0030223:neutrophil differentiation;	GO:0005634:nucleus;	GO:0043565:sequence-specific DNA binding;GO:0003700:sequence-specific DNA binding transcription factor activity;
ENSDARG00000000779	2124	867	28.24	848	28.68	987	28.97	1196	31.32	17	28771028	28797395	-	scfd1	sec1 family domain containing 1 [Source:ZFIN%3BAcc:ZDB-GENE-030116-3]	-	-	-
ENSDARG00000000796	5776	68	0.81	67	0.83	78	0.84	125	1.2	23	32149269	32194397	-	nr4a1	nuclear receptor subfamily 4%2C group A%2C member 1 [Source:ZFIN%3BAcc:ZDB-GENE-040704-11]	GO:0043401:steroid hormone mediated signaling pathway;GO:0006355:regulation of transcription, DNA-templated;	GO:0005634:nucleus;	GO:0008270:zinc ion binding;GO:0043565:sequence-specific DNA binding;GO:0003707:steroid hormone receptor activity;GO:0004879:ligand-activated sequence-specific DNA binding RNA polymerase II transcription factor activity;
ENSDARG00000000804	1602	170	7.34	144	6.46	199	7.74	184	6.39	10	13209580	13236012	+	rassf6	Ras association domain family member 6 [Source:ZFIN%3BAcc:ZDB-GENE-030616-513]	GO:0007165:signal transduction;	-	-
ENSDARG00000000830	2981	353	8.19	351	8.46	392	8.2	405	7.56	24	37799818	37823488	+	telo2	TEL2%2C telomere maintenance 2%2C homolog (S. cerevisiae) [Source:NCBI gene%3BAcc:777634]	-	GO:0005634:nucleus;GO:0005737:cytoplasm;GO:0016020:membrane;	-
ENSDARG00000000837	3267	149	3.16	127	2.79	169	3.22	203	3.46	17	33158294	33201840	+	snx9a	sorting nexin 9a [Source:ZFIN%3BAcc:ZDB-GENE-030616-66]	-	-	-
ENSDARG00000000853	3842	724	13.04	674	12.6	746	12.1	896	12.97	22	472327	506522	-	dstyk	dual serine/threonine and tyrosine protein kinase [Source:NCBI gene%3BAcc:402922]	GO:0006468:protein phosphorylation;	GO:0005737:cytoplasm;	GO:0004713:protein tyrosine kinase activity;GO:0004712:protein serine/threonine/tyrosine kinase activity;GO:0005524:ATP binding;GO:0004674:protein serine/threonine kinase activity;
ENSDARG00000000857	3255	990	21.04	1013	22.35	1206	23.1	1241	21.21	8	23826985	23860719	+	mapk14a	mitogen-activated protein kinase 14a [Source:NCBI gene%3BAcc:65237]	GO:0006468:protein phosphorylation;GO:0006355:regulation of transcription, DNA-templated;GO:0006950:response to stress;GO:0000165:MAPK cascade;GO:0040016:embryonic cleavage;GO:0023014:signal transduction by protein phosphorylation;GO:0031647:regulation of protein stability;GO:0001756:somitogenesis;	GO:0005737:cytoplasm;GO:0005634:nucleus;	GO:0004707:MAP kinase activity;GO:0005524:ATP binding;
ENSDARG00000000861	9356	4772	35.28	4784	36.73	5786	38.55	6790	40.37	7	41160225	41275897	+	scrib	scribble planar cell polarity protein [Source:NCBI gene%3BAcc:368473]	GO:0001764:neuron migration;GO:0060027:convergent extension involved in gastrulation;GO:0060561:apoptotic process involved in morphogenesis;GO:0045930:negative regulation of mitotic cell cycle;GO:0050918:positive chemotaxis;GO:0014021:secondary neural tube formation;GO:0008283:cell proliferation;GO:0016337:single organismal cell-cell adhesion;GO:0000132:establishment of mitotic spindle orientatio…	GO:0042734:presynaptic membrane;GO:0005913:cell-cell adherens junction;GO:0005737:cytoplasm;GO:0045211:postsynaptic membrane;GO:0031252:cell leading edge;GO:0005886:plasma membrane;	GO:0005515:protein binding;
ENSDARG00000000887	1392	487	24.2	493	25.44	594	26.6	591	23.62	23	32101202	32107608	+	zgc:56699	zgc:56699 [Source:ZFIN%3BAcc:ZDB-GENE-040426-2099]	-	-	-
ENSDARG00000000906	1524	48	2.18	51	2.4	41	1.68	54	1.97	16	20934353	20977706	+	skap2	src kinase associated phosphoprotein 2 [Source:NCBI gene%3BAcc:368564]	GO:0042113:B cell activation;GO:0016310:phosphorylation;	GO:0005737:cytoplasm;	GO:0016301:kinase activity;GO:0005543:phospholipid binding;
ENSDARG00000000935	8207	236	1.99	220	1.93	257	1.95	274	1.86	12	36416173	36471889	+	unk	unk zinc finger [Source:ZFIN%3BAcc:ZDB-GENE-040426-707]	-	-	GO:0008270:zinc ion binding;GO:0003676:nucleic acid binding;GO:0005488:binding;
ENSDARG00000000943	3355	666	13.73	639	13.68	651	12.1	804	13.33	6	7249531	7280299	+	dzip1	DAZ interacting zinc finger protein 1 [Source:NCBI gene%3BAcc:402875]	GO:0001568:blood vessel development;GO:0001947:heart looping;GO:0006607:NLS-bearing protein import into nucleus;GO:0021984:adenohypophysis development;GO:0031290:retinal ganglion cell axon guidance;GO:0008589:regulation of smoothened signaling pathway;GO:2000223:regulation of BMP signaling pathway involved in heart jogging;	GO:0031513:nonmotile primary cilium;GO:0005737:cytoplasm;GO:0005634:nucleus;	GO:0008270:zinc ion binding;
ENSDARG00000000966	10270	1869	12.59	1514	10.59	1826	11.08	2193	11.88	8	43379436	43574935	-	ncor2	nuclear receptor corepressor 2 [Source:ZFIN%3BAcc:ZDB-GENE-030616-81]	GO:0030097:hemopoiesis;	GO:0005634:nucleus;	GO:0003677:DNA binding;GO:0003682:chromatin binding;GO:0005488:binding;
ENSDARG00000001014	9635	5482	39.36	4759	35.48	5892	38.12	7996	46.16	3	5102656	5228841	-	myh9b	myosin%2C heavy chain 9b%2C non-muscle [Source:ZFIN%3BAcc:ZDB-GENE-030131-998]	-	-	-
ENSDARG00000001015	7660	380	3.43	335	3.14	305	2.48	378	2.74	19	6960388	6988866	-	znf384l	zinc finger protein 384 like [Source:ZFIN%3BAcc:ZDB-GENE-030616-498]	-	GO:0005622:intracellular;	GO:0008270:zinc ion binding;GO:0003676:nucleic acid binding;
ENSDARG00000001057	1504	1554	71.48	1374	65.62	1567	64.94	1663	61.5	22	550828	557965	-	bysl	bystin-like [Source:ZFIN%3BAcc:ZDB-GENE-040426-1287]	-	-	-
ENSDARG00000001127	2608	34	0.9	13	0.36	32	0.76	38	0.81	25	35250976	35271284	+	slc17a6a	solute carrier family 17 member 6a [Source:NCBI gene%3BAcc:494492]	GO:0006836:neurotransmitter transport;GO:0055085:transmembrane transport;GO:0006814:sodium ion transport;	GO:0030054:cell junction;GO:0043005:neuron projection;GO:0030672:synaptic vesicle membrane;GO:0016021:integral component of membrane;	GO:0015293:symporter activity;
ENSDARG00000001129	9940	1827	12.72	1581	11.42	1883	11.81	2307	12.91	17	19419989	19466319	-	dicer1	dicer 1%2C ribonuclease type III [Source:NCBI gene%3BAcc:324724]	GO:0035279:mRNA cleavage involved in gene silencing by miRNA;GO:0021591:ventricular system development;GO:0030423:targeting of mRNA for destruction involved in RNA interference;GO:0031054:pre-miRNA processing;GO:0030422:production of siRNA involved in RNA interference;	GO:0016442:RISC complex;GO:0005737:cytoplasm;	GO:0004525:ribonuclease III activity;GO:0046872:metal ion binding;GO:0008026:ATP-dependent helicase activity;GO:0070883:pre-miRNA binding;GO:0003725:double-stranded RNA binding;GO:0005524:ATP binding;
ENSDARG00000001154	4519	21	0.32	17	0.27	20	0.28	32	0.39	8	43941313	44015210	-	rimbp2	RIMS binding protein 2 [Source:ZFIN%3BAcc:ZDB-GENE-040724-96]	-	-	GO:0005515:protein binding;
ENSDARG00000001162	5193	1695	22.58	1445	19.99	1802	21.63	2180	23.35	14	25063318	25078580	-	matr3l1.1	matrin 3-like 1.1 [Source:ZFIN%3BAcc:ZDB-GENE-030616-40]	-	-	-
ENSDARG00000001169	1724	6	0.24	7	0.29	3	0.11	4	0.13	19	7173613	7179694	+	hsd17b8	hydroxysteroid (17-beta) dehydrogenase 8 [Source:ZFIN%3BAcc:ZDB-GENE-010110-1]	GO:0008152:metabolic process;	-	GO:0016491:oxidoreductase activity;GO:0000166:nucleotide binding;
ENSDARG00000001210	949	616	44.9	733	55.48	704	46.24	717	42.02	7	32624684	32629458	-	arl14ep	ADP-ribosylation factor-like 14 effector protein [Source:ZFIN%3BAcc:ZDB-GENE-060825-216]	-	-	GO:0003676:nucleic acid binding;
ENSDARG00000001220	15337	2033	9.17	1598	7.48	2191	8.9	2792	10.13	9	17045875	17286330	-	mycbp2	MYC binding protein 2 [Source:NCBI gene%3BAcc:368439]	GO:0042068:regulation of pteridine metabolic process;GO:0016198:axon choice point recognition;GO:0021986:habenula development;GO:0031290:retinal ganglion cell axon guidance;	GO:0005737:cytoplasm;	GO:0008270:zinc ion binding;GO:0004842:ubiquitin-protein transferase activity;GO:0005515:protein binding;
ENSDARG00000001234	3149	68	1.49	58	1.32	83	1.64	66	1.17	7	17648931	17690983	-	map4k2	mitogen-activated protein kinase kinase kinase kinase 2 [Source:ZFIN%3BAcc:ZDB-GENE-030616-163]	GO:0006468:protein phosphorylation;	-	GO:0005524:ATP binding;GO:0004674:protein serine/threonine kinase activity;
ENSDARG00000001241	2450	3496	98.72	3253	95.37	3971	101.03	4218	95.76	7	41146560	41158143	+	puf60b	poly-U binding splicing factor b [Source:NCBI gene%3BAcc:415211]	GO:0006915:apoptotic process;GO:0006355:regulation of transcription, DNA-templated;GO:0008380:RNA splicing;GO:0006397:mRNA processing;	GO:0030529:ribonucleoprotein complex;GO:0005634:nucleus;	GO:0003723:RNA binding;GO:0003677:DNA binding;GO:0000166:nucleotide binding;
ENSDARG00000001244	4499	3554	54.65	3395	54.2	4115	57.01	5285	65.34	17	25426091	25440344	+	srrm1	serine/arginine repetitive matrix 1 [Source:ZFIN%3BAcc:ZDB-GENE-040426-2789]	GO:0006397:mRNA processing;	-	-
ENSDARG00000001249	1419	146	7.12	125	6.33	166	7.29	186	7.29	14	5394630	5407555	-	pcgf1	polycomb group ring finger 1 [Source:NCBI gene%3BAcc:368900]	GO:0006355:regulation of transcription, DNA-templated;	GO:0031519:PcG protein complex;	GO:0008270:zinc ion binding;
ENSDARG00000001259	1090	50	3.17	28	1.85	31	1.77	38	1.94	25	35304903	35343303	+	gas2a	growth arrest-specific 2a [Source:ZFIN%3BAcc:ZDB-GENE-091013-1]	-	-	-
ENSDARG00000001303	1620	0	0	0	0	0	0	0	0	19	7105838	7144548	-	psmb8a	proteasome 20S subunit beta 8A [Source:ZFIN%3BAcc:ZDB-GENE-990415-141]	GO:0051603:proteolysis involved in cellular protein catabolic process;	GO:0005737:cytoplasm;GO:0005839:proteasome core complex;GO:0005634:nucleus;	GO:0004298:threonine-type endopeptidase activity;
ENSDARG00000001313	3360	1017	20.94	966	20.65	1125	20.87	1329	22	17	28798725	28811747	-	g2e3	G2/M-phase specific E3 ubiquitin protein ligase [Source:ZFIN%3BAcc:ZDB-GENE-030616-400]	GO:0006464:cellular protein modification process;	GO:0005622:intracellular;	GO:0004842:ubiquitin-protein transferase activity;GO:0008270:zinc ion binding;
ENSDARG00000001354	2408	84	2.41	59	1.76	74	1.92	73	1.69	6	41144155	41161017	+	slc6a22.2	solute carrier family 6 member 22%2C tandem duplicate 2 [Source:ZFIN%3BAcc:ZDB-GENE-030616-628]	-	-	-
ENSDARG00000001414	2828	172	4.21	140	3.56	161	3.55	199	3.91	18	23373683	23456101	+	mctp2a	multiple C2 domains%2C transmembrane 2a [Source:ZFIN%3BAcc:ZDB-GENE-040724-63]	-	-	-
ENSDARG00000001431	6533	3134	33.19	3170	34.85	3893	37.14	4818	41.02	7	6969909	7133475	+	actn3b	actinin alpha 3b [Source:ZFIN%3BAcc:ZDB-GENE-030131-2040]	GO:1901017:negative regulation of potassium ion transmembrane transporter activity;GO:0051289:protein homotetramerization;GO:0051017:actin filament bundle assembly;GO:0043268:positive regulation of potassium ion transport;GO:0030035:microspike assembly;GO:0006936:muscle contraction;GO:0048041:focal adhesion assembly;GO:0051764:actin crosslink formation;GO:2000009:negative regulation of protein lo…	GO:0005925:focal adhesion;GO:0030175:filopodium;GO:0030018:Z disc;	GO:0030375:thyroid hormone receptor coactivator activity;GO:0070080:titin Z domain binding;GO:0005509:calcium ion binding;GO:0046983:protein dimerization activity;GO:0042802:identical protein binding;GO:0031432:titin binding;GO:0051015:actin filament binding;GO:0044325:ion channel binding;GO:0051373:FATZ binding;
ENSDARG00000001437	1792	385	14.86	431	17.28	1230	42.78	1378	42.77	23	22200467	22212635	+	slc2a1a	solute carrier family 2 member 1a [Source:ZFIN%3BAcc:ZDB-GENE-030131-3158]	-	-	-
ENSDARG00000001442	4105	68	1.15	60	1.05	69	1.05	64	0.87	14	32793272	32824408	-	inppl1b	inositol polyphosphate phosphatase-like 1b [Source:NCBI gene%3BAcc:368433]	GO:0007155:cell adhesion;GO:0046856:phosphatidylinositol dephosphorylation;	GO:0016020:membrane;GO:0005829:cytosol;GO:0030479:actin cortical patch;	GO:0003779:actin binding;GO:0016787:hydrolase activity;GO:0017124:SH3 domain binding;
ENSDARG00000001447	3766	405	7.44	403	7.69	532	8.81	547	8.08	2	5811482	5836116	-	mier1b	mesoderm induction early response 1b%2C transcriptional regulator [Source:ZFIN%3BAcc:ZDB-GENE-070705-170]	-	-	-
ENSDARG00000001452	3337	289	5.99	256	5.51	314	5.87	397	6.62	13	24671481	24679636	+	adam8a	ADAM metallopeptidase domain 8a [Source:ZFIN%3BAcc:ZDB-GENE-030616-622]	GO:0007229:integrin-mediated signaling pathway;GO:0006508:proteolysis;	-	GO:0002020:protease binding;GO:0004222:metalloendopeptidase activity;GO:0008270:zinc ion binding;
ENSDARG00000001463	3152	1	0.02	1	0.02	2	0.04	3	0.05	17	25414033	25425321	+	tdh2	L-threonine dehydrogenase 2 [Source:ZFIN%3BAcc:ZDB-GENE-070620-14]	GO:0044237:cellular metabolic process;	-	GO:0000166:nucleotide binding;GO:0050662:coenzyme binding;GO:0003824:catalytic activity;
ENSDARG00000001470	2188	195	6.17	156	5.12	176	5.01	187	4.75	1	47116121	47122141	-	mhc1zea	major histocompatibility complex class I ZEA [Source:ZFIN%3BAcc:ZDB-GENE-070705-176]	-	-	-
ENSDARG00000001498	3252	14	0.3	5	0.11	49	0.94	60	1.03	12	27156943	27206904	+	skap1	src kinase associated phosphoprotein 1 [Source:ZFIN%3BAcc:ZDB-GENE-090721-1]	-	-	GO:0005543:phospholipid binding;
ENSDARG00000001549	2996	351	8.1	345	8.27	404	8.41	522	9.69	9	2762270	2777286	+	sp3a	sp3a transcription factor [Source:ZFIN%3BAcc:ZDB-GENE-070410-111]	-	GO:0005622:intracellular;	GO:0008270:zinc ion binding;GO:0003676:nucleic acid binding;
ENSDARG00000001557	2990	453	10.48	511	12.28	613	12.78	695	12.93	6	52226682	52235118	-	tomm34	translocase of outer mitochondrial membrane 34 [Source:ZFIN%3BAcc:ZDB-GENE-030131-2081]	-	-	-
ENSDARG00000001558	2560	1852	50.05	1810	50.78	2349	57.2	2816	61.18	19	6990970	7000603	+	kifc1	kinesin family member C1 [Source:ZFIN%3BAcc:ZDB-GENE-000208-21]	GO:0007018:microtubule-based movement;	GO:0005875:microtubule associated complex;GO:0005874:microtubule;	GO:0005524:ATP binding;GO:0003777:microtubule motor activity;
ENSDARG00000001559	12563	16	0.09	23	0.13	23	0.11	33	0.15	19	36114846	36675023	-	csmd2	CUB and Sushi multiple domains 2 [Source:ZFIN%3BAcc:ZDB-GENE-030616-39]	-	-	-
ENSDARG00000001572	1854	0	0	0	0	0	0	0	0	19	5259503	5265155	-	prf1.3	perforin 1.3 [Source:ZFIN%3BAcc:ZDB-GENE-060503-461]	-	-	-
ENSDARG00000001578	1421	344	16.75	339	17.14	335	14.7	329	12.88	13	24579108	24582236	+	echs1	enoyl CoA hydratase%2C short chain%2C 1%2C mitochondrial [Source:ZFIN%3BAcc:ZDB-GENE-030616-617]	-	-	-
ENSDARG00000001621	4130	182	3.05	159	2.77	182	2.75	184	2.48	8	25019542	25034411	-	nfyal	nuclear transcription factor Y%2C alpha%2C like [Source:ZFIN%3BAcc:ZDB-GENE-040718-491]	GO:0006355:regulation of transcription, DNA-templated;	GO:0016602:CCAAT-binding factor complex;	GO:0003677:DNA binding;GO:0003700:sequence-specific DNA binding transcription factor activity;
ENSDARG00000001634	9034	1335	10.22	1092	8.68	1309	9.03	1479	9.11	7	19070464	19146926	-	kirrel1a	kirre like nephrin family adhesion molecule 1a [Source:ZFIN%3BAcc:ZDB-GENE-040426-2126]	-	GO:0016020:membrane;	GO:0042802:identical protein binding;
ENSDARG00000001656	1486	0	0	0	0	0	0	0	0	19	7111779	7144585	-	psmb13a	proteasome 20S subunit beta 13a [Source:ZFIN%3BAcc:ZDB-GENE-001208-2]	GO:0051603:proteolysis involved in cellular protein catabolic process;	GO:0005737:cytoplasm;GO:0005839:proteasome core complex;GO:0005634:nucleus;	GO:0004298:threonine-type endopeptidase activity;
ENSDARG00000001676	2380	500	14.53	392	11.83	440	11.52	532	12.43	9	54751201	54840209	-	gpm6bb	glycoprotein M6Bb [Source:ZFIN%3BAcc:ZDB-GENE-030710-10]	-	GO:0016021:integral component of membrane;	-
ENSDARG00000001686	2043	19	0.64	23	0.81	29	0.88	26	0.71	8	23009662	23028536	+	uckl1a	uridine-cytidine kinase 1-like 1a [Source:ZFIN%3BAcc:ZDB-GENE-040724-238]	GO:0016310:phosphorylation;	-	GO:0016773:phosphotransferase activity, alcohol group as acceptor;GO:0004849:uridine kinase activity;GO:0005524:ATP binding;
ENSDARG00000001710	3796	689	12.56	680	12.87	695	11.41	885	12.97	19	6938289	6957404	+	flot1a	flotillin 1a [Source:ZFIN%3BAcc:ZDB-GENE-020430-1]	-	-	-
ENSDARG00000001712	4732	14	0.2	33	0.5	24	0.32	34	0.4	11	8303941	8350945	-	si:ch211-247n2.1	si:ch211-247n2.1 [Source:ZFIN%3BAcc:ZDB-GENE-141216-101]	-	-	-
ENSDARG00000001721	3451	1477	29.61	1306	27.18	1825	32.96	2269	36.57	2	42942552	42960353	-	oc90	otoconin 90 [Source:ZFIN%3BAcc:ZDB-GENE-070912-300]	GO:0016042:lipid catabolic process;GO:0048840:otolith development;	-	GO:0004623:phospholipase A2 activity;GO:0005509:calcium ion binding;
ENSDARG00000001729	4060	2331	39.72	2382	42.14	2738	42.04	3055	41.85	17	28706946	28742980	+	strn3	striatin%2C calmodulin binding protein 3 [Source:ZFIN%3BAcc:ZDB-GENE-030616-405]	-	-	-
ENSDARG00000001733	3356	231	4.76	236	5.05	206	3.83	281	4.66	9	42546504	42650623	+	gulp1a	GULP PTB domain containing engulfment adaptor 1a [Source:NCBI gene%3BAcc:368404]	GO:0006915:apoptotic process;GO:0006909:phagocytosis;	GO:0005737:cytoplasm;	-
ENSDARG00000001734	2125	214	6.97	194	6.56	230	6.75	276	7.22	22	20925849	20950448	-	fkbp8	FKBP prolyl isomerase 8 [Source:ZFIN%3BAcc:ZDB-GENE-040426-1849]	-	-	-
ENSDARG00000001754	3189	1808	39.22	1826	41.13	2115	41.34	2391	41.7	23	23126130	23179417	-	noc2l	NOC2-like nucleolar associated transcriptional repressor [Source:ZFIN%3BAcc:ZDB-GENE-000607-75]	-	-	-
ENSDARG00000001760	6359	1	0.01	5	0.06	1	0.01	0	0	16	16621242	16649764	-	tnxba	tenascin XBa [Source:ZFIN%3BAcc:ZDB-GENE-070103-5]	-	-	-
ENSDARG00000001767	3762	249	4.58	236	4.51	330	5.47	329	4.86	21	27407481	27413294	-	slc29a2	solute carrier family 29 member 2 [Source:ZFIN%3BAcc:ZDB-GENE-050220-15]	GO:0006810:transport;	GO:0016021:integral component of membrane;	GO:0005337:nucleoside transmembrane transporter activity;
ENSDARG00000001769	3733	810	15.01	711	13.68	918	15.33	1048	15.62	21	15756549	15816317	+	ptpra	protein tyrosine phosphatase receptor type A [Source:ZFIN%3BAcc:ZDB-GENE-020107-1]	-	-	-
ENSDARG00000001771	1520	1	0.05	1	0.05	2	0.08	1	0.04	2	6303639	6316167	+	otol1a	otolin 1a [Source:NCBI gene%3BAcc:553759]	GO:0048840:otolith development;	GO:0005576:extracellular region;	-
ENSDARG00000001776	4444	79	1.23	86	1.39	98	1.37	111	1.39	7	62320134	62439872	+	stim2b	stromal interaction molecule 2b [Source:ZFIN%3BAcc:ZDB-GENE-120404-3]	-	-	-
ENSDARG00000001777	4400	1703	26.78	1590	25.96	1893	26.82	2108	26.65	10	1597270	1636452	-	nup155	nucleoporin 155 [Source:ZFIN%3BAcc:ZDB-GENE-040426-711]	GO:0006913:nucleocytoplasmic transport;	GO:0005643:nuclear pore;	GO:0017056:structural constituent of nuclear pore;
ENSDARG00000001781	3170	165	3.6	155	3.51	178	3.5	170	2.98	4	11172964	11198055	+	tspan11	tetraspanin 11 [Source:ZFIN%3BAcc:ZDB-GENE-041210-93]	-	GO:0016021:integral component of membrane;	-
ENSDARG00000001782	2627	202	5.32	205	5.61	317	7.52	292	6.18	11	8129536	8150894	+	prkacba	protein kinase%2C cAMP-dependent%2C catalytic%2C beta a [Source:ZFIN%3BAcc:ZDB-GENE-040426-1351]	GO:0006468:protein phosphorylation;	-	GO:0005524:ATP binding;GO:0004674:protein serine/threonine kinase activity;
ENSDARG00000001785	6850	98	0.99	90	0.94	63	0.57	106	0.86	16	555746	563732	-	irx2a	iroquois homeobox 2a [Source:ZFIN%3BAcc:ZDB-GENE-040426-1446]	GO:0060042:retina morphogenesis in camera-type eye;GO:0006355:regulation of transcription, DNA-templated;	GO:0005634:nucleus;	GO:0043565:sequence-specific DNA binding;GO:0003700:sequence-specific DNA binding transcription factor activity;
ENSDARG00000001788	1410	2960	145.23	2643	134.64	3124	138.11	3131	123.51	9	33145522	33148873	+	atp5po	ATP synthase peripheral stalk subunit OSCP [Source:ZFIN%3BAcc:ZDB-GENE-050522-147]	GO:0015986:ATP synthesis coupled proton transport;	-	GO:0046933:proton-transporting ATP synthase activity, rotational mechanism;
ENSDARG00000001803	4933	121	1.7	83	1.21	99	1.25	139	1.57	3	31728871	31784082	-	kcnh6a	potassium voltage-gated channel%2C subfamily H (eag-related)%2C member 6a [Source:ZFIN%3BAcc:ZDB-GENE-040702-5]	GO:0055085:transmembrane transport;GO:0006813:potassium ion transport;	GO:0016021:integral component of membrane;	GO:0005249:voltage-gated potassium channel activity;
ENSDARG00000001804	1818	36	1.37	19	0.75	26	0.89	29	0.89	3	56861059	56871984	-	zgc:112148	zgc:112148 [Source:ZFIN%3BAcc:ZDB-GENE-050417-235]	-	GO:0016021:integral component of membrane;	-
ENSDARG00000001807	4854	93	1.33	78	1.15	79	1.01	99	1.13	20	35797998	35841570	-	tnfrsf21	tumor necrosis factor receptor superfamily%2C member 21 [Source:ZFIN%3BAcc:ZDB-GENE-030131-5971]	GO:0014045:establishment of endothelial blood-brain barrier;GO:0007165:signal transduction;GO:0002040:sprouting angiogenesis;	-	-
ENSDARG00000001817	663	14	1.46	10	1.08	7	0.66	23	1.93	2	55199721	55215510	+	zmp:0000000521	zmp:0000000521 [Source:ZFIN%3BAcc:ZDB-GENE-130530-524]	-	-	-
ENSDARG00000001818	5732	143	1.73	76	0.95	145	1.58	141	1.37	22	26129250	26175237	-	c3b.2	complement component c3b%2C tandem duplicate 2 [Source:ZFIN%3BAcc:ZDB-GENE-030131-3063]	-	GO:0005615:extracellular space;	GO:0004866:endopeptidase inhibitor activity;
ENSDARG00000001825	5120	87	1.18	103	1.44	101	1.23	131	1.42	13	24717880	24743151	+	cfap43	cilia and flagella associated protein 43 [Source:ZFIN%3BAcc:ZDB-GENE-080815-3]	-	-	-
ENSDARG00000001829	3299	1330	27.89	1262	27.48	1483	28.02	1860	31.36	24	24101811	24118451	-	zgc:112982	zgc:112982 [Source:ZFIN%3BAcc:ZDB-GENE-050306-55]	-	-	-
ENSDARG00000001835	7335	67	0.63	44	0.43	84	0.71	101	0.77	9	31589425	31747106	-	nalcn	sodium leak channel%2C non-selective [Source:ZFIN%3BAcc:ZDB-GENE-050410-12]	-	-	-
ENSDARG00000001857	3695	590	11.05	487	9.47	649	10.95	779	11.73	21	43178817	43246873	+	aff4	AF4/FMR2 family%2C member 4 [Source:ZFIN%3BAcc:ZDB-GENE-100910-5]	-	-	-
ENSDARG00000001859	1401	323	15.95	391	20.05	430	19.13	461	18.3	25	14507567	14510482	+	dbx1b	developing brain homeobox 1b [Source:NCBI gene%3BAcc:30416]	GO:0021515:cell differentiation in spinal cord;GO:0006355:regulation of transcription, DNA-templated;	GO:0005634:nucleus;	GO:0003700:sequence-specific DNA binding transcription factor activity;GO:0000976:transcription regulatory region sequence-specific DNA binding;
ENSDARG00000001870	4471	2180	33.73	1998	32.1	2161	30.13	2271	28.25	1	1689775	1706159	+	atp1a1a.4	ATPase Na+/K+ transporting subunit alpha 1a%2C tandem duplicate 4 [Source:ZFIN%3BAcc:ZDB-GENE-001212-4]	GO:0015672:monovalent inorganic cation transport;GO:0006754:ATP biosynthetic process;	GO:0016021:integral component of membrane;	GO:0046872:metal ion binding;GO:0015077:monovalent inorganic cation transmembrane transporter activity;GO:0019829:cation-transporting ATPase activity;GO:0005524:ATP binding;
ENSDARG00000001873	2374	1257	36.63	1209	36.58	1348	35.39	1327	31.09	9	48185936	48214216	-	phgdh	phosphoglycerate dehydrogenase [Source:ZFIN%3BAcc:ZDB-GENE-030131-647]	GO:0006564:L-serine biosynthetic process;GO:0055114:oxidation-reduction process;	-	GO:0051287:NAD binding;GO:0004617:phosphoglycerate dehydrogenase activity;
ENSDARG00000001879	8269	1639	13.71	1472	12.79	1609	12.13	2019	13.58	25	14510773	14637660	-	nav2b	neuron navigator 2b [Source:ZFIN%3BAcc:ZDB-GENE-061207-13]	-	-	-
ENSDARG00000001880	2679	154	3.98	134	3.59	163	3.79	201	4.17	14	21699129	21751346	+	stx3a	syntaxin 3A [Source:ZFIN%3BAcc:ZDB-GENE-040426-1489]	GO:0016192:vesicle-mediated transport;GO:0006886:intracellular protein transport;GO:0006836:neurotransmitter transport;	GO:0016020:membrane;	GO:0005484:SNAP receptor activity;
ENSDARG00000001881	2375	3	0.09	1	0.03	3	0.08	2	0.05	23	14097508	14180307	+	cacnb3a	calcium channel%2C voltage-dependent%2C beta 3a [Source:ZFIN%3BAcc:ZDB-GENE-060221-2]	GO:0070588:calcium ion transmembrane transport;	GO:0005891:voltage-gated calcium channel complex;	GO:0005245:voltage-gated calcium channel activity;
ENSDARG00000001882	5122	14	0.19	18	0.25	22	0.27	16	0.17	6	40715637	40722480	-	kbtbd12	kelch repeat and BTB (POZ) domain containing 12 [Source:NCBI gene%3BAcc:559380]	-	-	-
ENSDARG00000001888	3342	398	8.24	367	7.89	483	9.01	589	9.8	13	10682427	10731325	-	ppm1ba	protein phosphatase%2C Mg2+/Mn2+ dependent%2C 1Ba [Source:ZFIN%3BAcc:ZDB-GENE-991102-16]	GO:0006470:protein dephosphorylation;	-	GO:0004722:protein serine/threonine phosphatase activity;GO:0030145:manganese ion binding;GO:0000287:magnesium ion binding;
ENSDARG00000001889	1537	4044	182.02	4005	187.16	4731	191.87	4013	145.23	23	35708730	35711398	+	tuba1a	tubulin%2C alpha 1a [Source:ZFIN%3BAcc:ZDB-GENE-090507-4]	GO:0007017:microtubule-based process;GO:0051258:protein polymerization;	GO:0005881:cytoplasmic microtubule;	GO:0005200:structural constituent of cytoskeleton;GO:0005525:GTP binding;GO:0019904:protein domain specific binding;GO:0046982:protein heterodimerization activity;GO:0003924:GTPase activity;
ENSDARG00000001890	7122	2220	21.56	2189	22.08	2620	22.93	2681	20.94	16	39385483	39477746	-	stt3b	STT3 oligosaccharyltransferase complex catalytic subunit B [Source:ZFIN%3BAcc:ZDB-GENE-030131-2638]	-	-	-
ENSDARG00000001891	2776	4	0.1	3	0.08	6	0.13	5	0.1	20	9241794	9278252	-	syt14b	synaptotagmin XIVb [Source:ZFIN%3BAcc:ZDB-GENE-041014-36]	-	-	-
ENSDARG00000001897	3517	985	19.38	921	18.81	1233	21.85	1238	19.58	11	31258116	31276080	-	man2b1	mannosidase%2C alpha%2C class 2B%2C member 1 [Source:ZFIN%3BAcc:ZDB-GENE-050327-52]	GO:0006013:mannose metabolic process;	-	GO:0030246:carbohydrate binding;GO:0004559:alpha-mannosidase activity;GO:0008270:zinc ion binding;
ENSDARG00000001898	3390	143	2.92	158	3.35	153	2.81	168	2.76	17	15658867	15667285	-	manea	mannosidase%2C endo-alpha [Source:ZFIN%3BAcc:ZDB-GENE-040912-87]	-	-	-
ENSDARG00000001906	5033	3	0.04	1	0.01	2	0.02	3	0.03	21	20229926	20308457	+	si:dkey-247m21.3	si:dkey-247m21.3 [Source:ZFIN%3BAcc:ZDB-GENE-091204-249]	-	-	-
ENSDARG00000001909	2698	22	0.56	17	0.45	29	0.67	49	1.01	24	20418959	20444844	-	vill	villin-like [Source:ZFIN%3BAcc:ZDB-GENE-081222-1]	-	-	-
ENSDARG00000001910	4487	286	4.41	214	3.43	267	3.71	280	3.47	7	29538628	29625509	-	rorab	RAR-related orphan receptor A%2C paralog b [Source:NCBI gene%3BAcc:554722]	-	-	-
ENSDARG00000001912	6485	14	0.15	14	0.16	23	0.22	22	0.19	4	19946294	20027571	-	drd4-rs	dopamine receptor D4 related sequence [Source:ZFIN%3BAcc:ZDB-GENE-051113-172]	GO:0007186:G-protein coupled receptor signaling pathway;	GO:0016021:integral component of membrane;GO:0044464:cell part;	GO:0004930:G-protein coupled receptor activity;
ENSDARG00000001913	7806	274	2.43	212	1.95	232	1.85	327	2.33	2	20406399	20428140	+	palmda	palmdelphin a [Source:ZFIN%3BAcc:ZDB-GENE-070705-48]	GO:0008360:regulation of cell shape;	GO:0016020:membrane;	-
ENSDARG00000001929	4010	94	1.62	92	1.65	82	1.27	70	0.97	23	37466967	37480785	+	pink1	PTEN induced kinase 1 [Source:ZFIN%3BAcc:ZDB-GENE-041212-53]	GO:0051402:neuron apoptotic process;GO:0006468:protein phosphorylation;GO:0060872:semicircular canal development;GO:0071542:dopaminergic neuron differentiation;	GO:0005829:cytosol;GO:0005739:mitochondrion;	GO:0004674:protein serine/threonine kinase activity;GO:0005524:ATP binding;
ENSDARG00000001930	5819	322	3.83	253	3.12	301	3.22	374	3.57	24	16962969	16980337	-	klhl15	kelch-like family member 15 [Source:NCBI gene%3BAcc:445186]	-	-	-
ENSDARG00000001933	2241	27	0.83	23	0.74	38	1.06	33	0.82	2	13056802	13148453	+	prkag2b	protein kinase%2C AMP-activated%2C gamma 2 non-catalytic subunit b [Source:ZFIN%3BAcc:ZDB-GENE-070912-442]	-	-	-
ENSDARG00000001937	5631	164	2.01	126	1.61	168	1.86	183	1.81	17	48433817	48458789	+	LO018422.1	solute carrier family 2%2C facilitated glucose transporter member 1-like [Source:NCBI gene%3BAcc:100334818]	-	-	-
ENSDARG00000001939	4051	533	9.1	519	9.2	660	10.16	749	10.28	7	25015151	25029261	+	b3gat3	beta-1%2C3-glucuronyltransferase 3 (glucuronosyltransferase I) [Source:ZFIN%3BAcc:ZDB-GENE-020419-3]	GO:0050650:chondroitin sulfate proteoglycan biosynthetic process;GO:0015012:heparan sulfate proteoglycan biosynthetic process;GO:0030198:extracellular matrix organization;GO:0051216:cartilage development;	GO:0016020:membrane;	GO:0015018:galactosylgalactosylxylosylprotein 3-beta-glucuronosyltransferase activity;
ENSDARG00000001940	2265	862	26.33	807	25.59	965	26.56	1006	24.7	2	21174998	21182561	+	dnajc1	DnaJ (Hsp40) homolog%2C subfamily C%2C member 1 [Source:ZFIN%3BAcc:ZDB-GENE-061103-529]	-	GO:0005634:nucleus;	GO:0003677:DNA binding;GO:0003682:chromatin binding;
ENSDARG00000001950	904	637	48.75	648	51.49	868	59.85	942	57.96	5	71699893	71722257	-	ak1	adenylate kinase 1 [Source:ZFIN%3BAcc:ZDB-GENE-040822-37]	GO:0046034:ATP metabolic process;GO:0016310:phosphorylation;	GO:0005737:cytoplasm;	GO:0004017:adenylate kinase activity;GO:0005524:ATP binding;
ENSDARG00000001953	3827	115	2.08	131	2.46	121	1.97	129	1.87	4	25472505	25485404	-	pfkfb3	6-phosphofructo-2-kinase/fructose-2%2C6-biphosphatase 3 [Source:ZFIN%3BAcc:ZDB-GENE-040426-2724]	GO:0006000:fructose metabolic process;GO:0016310:phosphorylation;GO:0006003:fructose 2,6-bisphosphate metabolic process;	-	GO:0004331:fructose-2,6-bisphosphate 2-phosphatase activity;GO:0003873:6-phosphofructo-2-kinase activity;GO:0005524:ATP binding;
ENSDARG00000001968	5682	172	2.09	105	1.33	120	1.32	172	1.68	8	6651253	6825588	-	dock5	dedicator of cytokinesis 5 [Source:ZFIN%3BAcc:ZDB-GENE-080108-4]	GO:0007520:myoblast fusion;GO:0007264:small GTPase mediated signal transduction;	-	GO:0005085:guanyl-nucleotide exchange factor activity;
ENSDARG00000001969	4627	634	9.48	624	9.69	772	10.4	834	10.03	11	12782296	12802123	-	txlng	taxilin gamma [Source:ZFIN%3BAcc:ZDB-GENE-060616-122]	-	-	GO:0019905:syntaxin binding;
ENSDARG00000001971	1066	0	0	1	0.07	0	0	1	0.05	16	47454586	47483142	-	cthrc1b	collagen triple helix repeat containing 1b [Source:ZFIN%3BAcc:ZDB-GENE-050420-46]	-	-	-
ENSDARG00000001975	2592	38	1.01	41	1.14	32	0.77	51	1.09	7	35112052	35126374	-	hsd11b2	hydroxysteroid (11-beta) dehydrogenase 2 [Source:ZFIN%3BAcc:ZDB-GENE-030131-6030]	GO:0008152:metabolic process;	-	GO:0000166:nucleotide binding;GO:0003845:11-beta-hydroxysteroid dehydrogenase [NAD(P)] activity;
ENSDARG00000001976	1509	28	1.28	104	4.95	45	1.86	126	4.64	18	25653599	25745636	+	fkbp16	FKBP prolyl isomerase 16 [Source:ZFIN%3BAcc:ZDB-GENE-050208-116]	GO:0006457:protein folding;GO:0000413:protein peptidyl-prolyl isomerization;	GO:0030176:integral component of endoplasmic reticulum membrane;GO:0005740:mitochondrial envelope;	GO:0005528:FK506 binding;GO:0003755:peptidyl-prolyl cis-trans isomerase activity;
ENSDARG00000001993	6228	31	0.34	34	0.39	34	0.34	41	0.37	6	40745437	40756138	-	myhb	myosin%2C heavy chain b [Source:ZFIN%3BAcc:ZDB-GENE-081124-1]	-	-	-
ENSDARG00000001994	3629	585	11.15	607	12.01	918	15.77	978	14.99	21	13861589	13921022	+	stxbp1a	syntaxin binding protein 1a [Source:ZFIN%3BAcc:ZDB-GENE-050626-106]	GO:0006904:vesicle docking involved in exocytosis;	-	-
ENSDARG00000001999	7458	497	4.61	392	3.78	415	3.47	472	3.52	7	42460302	42547992	+	adamts18	ADAM metallopeptidase with thrombospondin type 1 motif%2C 18 [Source:ZFIN%3BAcc:ZDB-GENE-070815-1]	-	-	-
ENSDARG00000002002	1453	33	1.57	30	1.48	33	1.42	44	1.68	22	39096911	39108026	+	lmcd1	LIM and cysteine-rich domains 1 [Source:ZFIN%3BAcc:ZDB-GENE-040426-1067]	-	-	-
ENSDARG00000002006	6470	250	2.67	273	3.03	270	2.6	279	2.4	16	18534834	18572875	+	rxrbb	retinoid x receptor%2C beta b [Source:NCBI gene%3BAcc:30486]	GO:0043401:steroid hormone mediated signaling pathway;GO:0045892:negative regulation of transcription, DNA-templated;	GO:0005634:nucleus;	GO:0008270:zinc ion binding;GO:0043565:sequence-specific DNA binding;GO:0003700:sequence-specific DNA binding transcription factor activity;GO:0003707:steroid hormone receptor activity;GO:0046872:metal ion binding;GO:0001071:nucleic acid binding transcription factor activity;GO:0003677:DNA binding;
ENSDARG00000002013	2792	178	4.41	169	4.35	204	4.55	315	6.28	19	23136170	23249822	-	grb10a	growth factor receptor-bound protein 10a [Source:ZFIN%3BAcc:ZDB-GENE-040822-32]	GO:0007165:signal transduction;	-	GO:0005543:phospholipid binding;
ENSDARG00000002016	1921	660	23.77	640	23.93	752	24.4	911	26.38	5	12908781	12979986	+	ppil2	peptidylprolyl isomerase (cyclophilin)-like 2 [Source:ZFIN%3BAcc:ZDB-GENE-040426-1096]	-	-	-
ENSDARG00000002020	7816	394	3.49	307	2.82	378	3.01	481	3.42	21	21195487	21242387	+	rictorb	RPTOR independent companion of MTOR%2C complex 2b [Source:ZFIN%3BAcc:ZDB-GENE-070810-5]	-	-	-
ENSDARG00000002021	2860	499	12.07	541	13.59	482	10.51	561	10.91	17	21126495	21152173	+	pygb	phosphorylase%2C glycogen%3B brain [Source:ZFIN%3BAcc:ZDB-GENE-040928-2]	GO:0005975:carbohydrate metabolic process;	-	GO:0030170:pyridoxal phosphate binding;GO:0008184:glycogen phosphorylase activity;
ENSDARG00000002026	1681	67	2.76	50	2.14	80	2.97	94	3.11	13	3667230	3843692	+	qkib	QKI%2C KH domain containing%2C RNA binding b [Source:ZFIN%3BAcc:ZDB-GENE-081028-54]	GO:0051028:mRNA transport;GO:0010628:positive regulation of gene expression;GO:0006397:mRNA processing;GO:0008380:RNA splicing;GO:0007286:spermatid development;GO:0006417:regulation of translation;GO:0042692:muscle cell differentiation;GO:0042759:long-chain fatty acid biosynthetic process;GO:0042552:myelination;GO:0001570:vasculogenesis;	GO:0005737:cytoplasm;GO:0005634:nucleus;	GO:0003723:RNA binding;GO:0017124:SH3 domain binding;
ENSDARG00000002031	2198	679	21.37	633	20.69	751	21.3	994	25.15	2	38068069	38080075	-	tox4a	TOX high mobility group box family member 4 a [Source:ZFIN%3BAcc:ZDB-GENE-070912-576]	-	-	-
ENSDARG00000002037	3249	28	0.6	30	0.66	33	0.63	43	0.74	11	18784847	18800299	-	pfkfb2b	6-phosphofructo-2-kinase/fructose-2%2C6-biphosphatase 2b [Source:ZFIN%3BAcc:ZDB-GENE-120222-1]	-	-	-
ENSDARG00000002060	2807	43	1.06	62	1.59	54	1.2	59	1.17	10	41279007	41302909	-	brf2	BRF2 RNA polymerase III transcription initiation factor subunit [Source:NCBI gene%3BAcc:445142]	GO:0006352:DNA-templated transcription, initiation;GO:0006355:regulation of transcription, DNA-templated;	GO:0005634:nucleus;	GO:0008270:zinc ion binding;
ENSDARG00000002071	2187	337	10.66	262	8.6	310	8.84	384	9.77	13	11489953	11536951	-	adss2	adenylosuccinate synthase 2 [Source:NCBI gene%3BAcc:550502]	-	-	-
ENSDARG00000002077	1243	167	9.29	211	12.19	188	9.43	264	11.81	13	31648271	31681951	+	mnat1	MNAT1 component of CDK activating kinase [Source:ZFIN%3BAcc:ZDB-GENE-041010-203]	GO:0007049:cell cycle;	GO:0005634:nucleus;	GO:0008270:zinc ion binding;
ENSDARG00000002082	5264	3478	45.71	3328	45.41	4171	49.39	4924	52.03	16	31434524	31452507	-	csnk2a1	casein kinase 2%2C alpha 1 polypeptide [Source:ZFIN%3BAcc:ZDB-GENE-990415-27]	GO:0006468:protein phosphorylation;	-	GO:0005524:ATP binding;GO:0004674:protein serine/threonine kinase activity;
ENSDARG00000002084	5462	1268	16.06	1061	13.95	1395	15.92	1564	15.93	23	20180159	20258490	-	lamb2	laminin%2C beta 2 (laminin S) [Source:ZFIN%3BAcc:ZDB-GENE-081030-4]	-	-	-
ENSDARG00000002097	1783	0	0	0	0	0	0	0	0	3	1749793	1761980	+	si:dkeyp-52c3.7	si:dkeyp-52c3.7 [Source:ZFIN%3BAcc:ZDB-GENE-110411-213]	-	-	-
ENSDARG00000002127	3717	1093	20.34	981	18.96	1330	22.3	1457	21.8	2	31437547	31452606	+	stam	signal transducing adaptor molecule (SH3 domain and ITAM motif) 1 [Source:ZFIN%3BAcc:ZDB-GENE-031118-123]	GO:0006886:intracellular protein transport;	-	-
ENSDARG00000002128	1993	541	18.78	554	19.97	544	17.01	601	16.77	4	17642731	17653566	+	cwf19l1	CWF19 like cell cycle control factor 1 [Source:NCBI gene%3BAcc:387304]	-	-	GO:0003824:catalytic activity;
ENSDARG00000002131	3783	785	14.36	723	13.73	695	11.45	1066	15.67	4	23886726	24031924	-	celf2	cugbp%2C Elav-like family member 2 [Source:NCBI gene%3BAcc:373117]	GO:0006397:mRNA processing;	GO:0005737:cytoplasm;GO:0005634:nucleus;	GO:0003723:RNA binding;GO:0000166:nucleotide binding;
ENSDARG00000002165	1173	17	1	15	0.92	15	0.8	25	1.19	24	12945803	12954482	+	psme1	proteasome activator subunit 1 [Source:ZFIN%3BAcc:ZDB-GENE-991110-17]	-	GO:0008537:proteasome activator complex;	-
ENSDARG00000002167	2889	229	5.48	203	5.05	271	5.85	338	6.51	3	16157120	16227683	-	cacnb1	calcium channel%2C voltage-dependent%2C beta 1 subunit [Source:ZFIN%3BAcc:ZDB-GENE-040718-399]	GO:0034765:regulation of ion transmembrane transport;GO:0070588:calcium ion transmembrane transport;GO:0070978:voltage-gated calcium channel complex assembly;GO:0006936:muscle contraction;	GO:0005891:voltage-gated calcium channel complex;	GO:0005245:voltage-gated calcium channel activity;
ENSDARG00000002168	2045	994	33.63	975	34.25	1178	35.91	1303	35.44	9	12579077	12595003	-	tra2b	transformer 2 beta homolog [Source:ZFIN%3BAcc:ZDB-GENE-040426-1094]	-	-	GO:0003676:nucleic acid binding;GO:0000166:nucleotide binding;
ENSDARG00000002172	1708	337	13.65	337	14.17	421	15.36	398	12.96	8	40325690	40327397	-	aplnra	apelin receptor a [Source:NCBI gene%3BAcc:561935]	GO:0055113:epiboly involved in gastrulation with mouth forming second;GO:0048738:cardiac muscle tissue development;GO:0042074:cell migration involved in gastrulation;GO:0007186:G-protein coupled receptor signaling pathway;	GO:0016021:integral component of membrane;	GO:0004945:angiotensin type II receptor activity;
ENSDARG00000002174	1482	157	7.33	161	7.8	193	8.12	251	9.42	4	17539134	17553996	+	itfg2	integrin alpha FG-GAP repeat containing 2 [Source:ZFIN%3BAcc:ZDB-GENE-041008-161]	-	-	-
ENSDARG00000002184	2482	483	13.46	471	13.63	546	13.71	554	12.42	5	36530836	36537975	+	igbp1	immunoglobulin (CD79A) binding protein 1 [Source:ZFIN%3BAcc:ZDB-GENE-040426-2928]	GO:0009966:regulation of signal transduction;	-	-
ENSDARG00000002190	1986	835	29.09	845	30.56	937	29.41	1014	28.4	1	33558555	33569245	+	chmp2bb	charged multivesicular body protein 2Bb [Source:NCBI gene%3BAcc:405840]	GO:0015031:protein transport;	GO:0005829:cytosol;GO:0031902:late endosome membrane;	-
ENSDARG00000002192	1973	7	0.25	4	0.15	3	0.09	5	0.14	22	10479965	10487490	-	aspn	asporin (LRR class 1) [Source:ZFIN%3BAcc:ZDB-GENE-041105-7]	-	-	-
ENSDARG00000002193	1546	0	0	0	0	0	0	0	0	8	54076195	54077740	-	rho	rhodopsin [Source:NCBI gene%3BAcc:30295]	GO:0018298:protein-chromophore linkage;GO:0016038:absorption of visible light;GO:0007602:phototransduction;GO:0009584:detection of visible light;GO:0007601:visual perception;GO:0007186:G-protein coupled receptor signaling pathway;	GO:0016021:integral component of membrane;GO:0001750:photoreceptor outer segment;	GO:0008020:G-protein coupled photoreceptor activity;
ENSDARG00000002194	2073	37	1.23	34	1.18	45	1.35	36	0.97	13	45496766	45523026	-	rhd	Rh blood group%2C D antigen [Source:ZFIN%3BAcc:ZDB-GENE-051213-1]	GO:0015696:ammonium transport;	GO:0016021:integral component of membrane;	GO:0008519:ammonium transmembrane transporter activity;
ENSDARG00000002196	6168	376	4.22	313	3.64	369	3.73	403	3.63	10	25369254	25385009	+	bach1b	BTB and CNC homology 1%2C basic leucine zipper transcription factor 1 b [Source:ZFIN%3BAcc:ZDB-GENE-050522-220]	-	-	-
ENSDARG00000002197	2797	92	2.28	97	2.49	95	2.12	145	2.88	13	36846789	36863039	-	pygl	phosphorylase%2C glycogen%2C liver [Source:ZFIN%3BAcc:ZDB-GENE-041205-1]	-	-	-
ENSDARG00000002204	1042	424	28.15	373	25.71	466	27.88	556	29.68	21	20383837	20384878	+	hspb11	heat shock protein%2C alpha-crystallin-related%2C b11 [Source:NCBI gene%3BAcc:796767]	GO:0006950:response to stress;	-	-
ENSDARG00000002210	2118	129	4.21	121	4.1	117	3.44	161	4.23	6	27041594	27057702	-	stk25a	serine/threonine kinase 25a [Source:ZFIN%3BAcc:ZDB-GENE-041010-92]	GO:0003401:axis elongation;GO:0006468:protein phosphorylation;GO:0007507:heart development;	-	GO:0004672:protein kinase activity;GO:0005524:ATP binding;
ENSDARG00000002213	3827	111	2.01	107	2.01	132	2.15	161	2.34	16	27442549	27502702	+	invs	inversin [Source:NCBI gene%3BAcc:245946]	GO:0035844:cloaca development;GO:0016055:Wnt signaling pathway;GO:0072116:pronephros formation;GO:0001947:heart looping;GO:0010171:body morphogenesis;GO:0060027:convergent extension involved in gastrulation;	GO:0005856:cytoskeleton;GO:0072372:primary cilium;GO:0005737:cytoplasm;	GO:0005516:calmodulin binding;
ENSDARG00000002215	2731	1962	49.7	1884	49.55	2256	51.49	2586	52.67	22	16282144	16291041	-	rtca	RNA 3'-terminal phosphate cyclase [Source:ZFIN%3BAcc:ZDB-GENE-030131-9687]	GO:0006396:RNA processing;	-	GO:0005524:ATP binding;GO:0003963:RNA-3'-phosphate cyclase activity;
ENSDARG00000002216	3872	434	7.75	371	6.88	447	7.2	518	7.44	5	72316803	72324371	-	tbx3a	T-box transcription factor 3a [Source:ZFIN%3BAcc:ZDB-GENE-070209-80]	GO:0006355:regulation of transcription, DNA-templated;GO:0035050:embryonic heart tube development;	GO:0005634:nucleus;	GO:0003677:DNA binding;GO:0003700:sequence-specific DNA binding transcription factor activity;
ENSDARG00000002217	3160	198	4.33	212	4.82	243	4.79	230	4.05	14	48932235	48939560	-	scocb	short coiled-coil protein b [Source:NCBI gene%3BAcc:791709]	-	-	-
ENSDARG00000002219	2069	0	0	0	0	6	0.18	6	0.16	13	23233956	23270576	-	si:dkey-103j14.5	si:dkey-103j14.5 [Source:ZFIN%3BAcc:ZDB-GENE-090313-170]	-	-	-
ENSDARG00000002220	1103	433	27.16	414	26.96	503	28.43	634	31.97	5	33295678	33298352	-	C5H9orf78	zgc:103692 [Source:ZFIN%3BAcc:ZDB-GENE-041010-15]	-	-	-
ENSDARG00000002230	4078	46	0.78	77	1.36	65	0.99	76	1.04	8	49403668	49432061	-	sypb	synaptophysin b [Source:ZFIN%3BAcc:ZDB-GENE-040718-205]	GO:0006810:transport;	GO:0016021:integral component of membrane;GO:0008021:synaptic vesicle;	GO:0005215:transporter activity;
ENSDARG00000002231	1185	38	2.22	28	1.7	55	2.89	55	2.58	2	52232630	52306803	+	plpp2a	phospholipid phosphatase 2a [Source:ZFIN%3BAcc:ZDB-GENE-140703-2]	-	-	-
ENSDARG00000002235	3509	459	9.05	422	8.64	466	8.28	554	8.78	7	24124289	24149670	-	mmp14a	matrix metallopeptidase 14a (membrane-inserted) [Source:ZFIN%3BAcc:ZDB-GENE-030901-1]	GO:0009948:anterior/posterior axis specification;GO:0001666:response to hypoxia;GO:0051216:cartilage development;GO:0006508:proteolysis;GO:0030010:establishment of cell polarity;GO:0048701:embryonic cranial skeleton morphogenesis;GO:0042074:cell migration involved in gastrulation;GO:0060027:convergent extension involved in gastrulation;	GO:0031012:extracellular matrix;	GO:0008270:zinc ion binding;GO:0005509:calcium ion binding;GO:0004222:metalloendopeptidase activity;
ENSDARG00000002240	1259	1555	85.44	1449	82.67	1548	76.64	1359	60.04	23	44536926	44546152	-	psmb6	proteasome 20S subunit beta 6 [Source:ZFIN%3BAcc:ZDB-GENE-990415-216]	GO:0051603:proteolysis involved in cellular protein catabolic process;	GO:0005737:cytoplasm;GO:0005839:proteasome core complex;GO:0005634:nucleus;	GO:0004298:threonine-type endopeptidase activity;
ENSDARG00000002241	1482	1	0.05	3	0.15	0	0	1	0.04	6	49412754	49414235	+	kcna2a	potassium voltage-gated channel%2C shaker-related subfamily%2C member 2a [Source:ZFIN%3BAcc:ZDB-GENE-131113-1]	-	-	-
ENSDARG00000002249	2272	29	0.88	26	0.82	29	0.8	45	1.1	18	12655766	12834323	+	tbxas1	thromboxane A synthase 1 (platelet) [Source:ZFIN%3BAcc:ZDB-GENE-030131-8805]	GO:0055114:oxidation-reduction process;	-	GO:0020037:heme binding;GO:0016705:oxidoreductase activity, acting on paired donors, with incorporation or reduction of molecular oxygen;GO:0004497:monooxygenase activity;GO:0005506:iron ion binding;GO:0009055:electron carrier activity;
ENSDARG00000002255	3418	177	3.58	156	3.28	252	4.6	301	4.9	24	41931585	41986895	+	epb41l3a	erythrocyte membrane protein band 4.1-like 3a [Source:ZFIN%3BAcc:ZDB-GENE-040822-8]	GO:0030866:cortical actin cytoskeleton organization;	GO:0005856:cytoskeleton;GO:0005737:cytoplasm;GO:0019898:extrinsic component of membrane;	GO:0003779:actin binding;GO:0005198:structural molecule activity;
ENSDARG00000002259	1675	0	0	3	0.13	0	0	0	0	12	4338298	4346085	-	ca15c	carbonic anhydrase XV c [Source:ZFIN%3BAcc:ZDB-GENE-061013-737]	GO:0006730:one-carbon metabolic process;GO:0006885:regulation of pH;GO:0006814:sodium ion transport;	-	GO:0004089:carbonate dehydratase activity;GO:0008270:zinc ion binding;
ENSDARG00000002264	640	216	23.35	213	23.91	175	17.04	233	20.25	5	25072894	25075179	+	mrpl41	mitochondrial ribosomal protein L41 [Source:NCBI gene%3BAcc:553805]	GO:0007049:cell cycle;GO:0006412:translation;GO:0006915:apoptotic process;	GO:0005762:mitochondrial large ribosomal subunit;	GO:0003735:structural constituent of ribosome;
ENSDARG00000002267	2495	1052	29.17	1086	31.26	1186	29.63	1379	30.74	16	44653266	44673851	-	dcaf13	ddb1 and cul4 associated factor 13 [Source:NCBI gene%3BAcc:393097]	GO:0006364:rRNA processing;	GO:0005730:nucleolus;GO:0030529:ribonucleoprotein complex;GO:0080008:Cul4-RING E3 ubiquitin ligase complex;	-
ENSDARG00000002271	2588	640	17.11	618	17.15	664	15.99	716	15.39	10	15603082	15613302	+	zfand5b	zinc finger%2C AN1-type domain 5b [Source:ZFIN%3BAcc:ZDB-GENE-040426-875]	-	-	GO:0008270:zinc ion binding;GO:0003677:DNA binding;
ENSDARG00000002285	5620	546	6.72	417	5.33	549	6.09	604	5.98	1	45671687	45700574	+	mcoln1a	mucolipin 1a [Source:ZFIN%3BAcc:ZDB-GENE-040426-2704]	-	-	-
ENSDARG00000002293	1549	4	0.18	4	0.19	3	0.12	3	0.11	22	17460871	17463643	-	si:ch211-197g15.6	si:ch211-197g15.6 [Source:ZFIN%3BAcc:ZDB-GENE-050208-457]	-	-	-
ENSDARG00000002295	3378	13	0.27	10	0.21	21	0.39	9	0.15	8	14855471	14883692	+	si:dkey-21p1.3	si:dkey-21p1.3 [Source:ZFIN%3BAcc:ZDB-GENE-081105-162]	-	-	-
ENSDARG00000002298	1106	49	3.06	28	1.82	35	1.97	42	2.11	12	17154655	17158635	+	ankrd22	ankyrin repeat domain 22 [Source:ZFIN%3BAcc:ZDB-GENE-040426-1120]	-	-	-
ENSDARG00000002299	1971	62	2.18	51	1.86	49	1.55	76	2.14	9	55576475	55594965	-	arsh	arylsulfatase H [Source:ZFIN%3BAcc:ZDB-GENE-081104-120]	-	-	-
ENSDARG00000002300	3557	11	0.21	7	0.14	0	0	3	0.05	5	12807902	12824607	-	p2rx2	purinergic receptor P2X%2C ligand-gated ion channel%2C 2 [Source:ZFIN%3BAcc:ZDB-GENE-030319-2]	GO:0035590:purinergic nucleotide receptor signaling pathway;GO:0006812:cation transport;	GO:0016021:integral component of membrane;	GO:0005524:ATP binding;GO:0004931:extracellular ATP-gated cation channel activity;GO:0001614:purinergic nucleotide receptor activity;
ENSDARG00000002304	853	407	33.01	374	31.49	504	36.83	577	37.62	18	30481030	30499489	-	gins2	GINS complex subunit 2 [Source:ZFIN%3BAcc:ZDB-GENE-050419-19]	GO:0006260:DNA replication;	GO:0005634:nucleus;	-
ENSDARG00000002305	2829	743	18.17	747	18.97	796	17.54	829	16.3	9	34246384	34260214	-	me3	malic enzyme 3%2C NADP(+)-dependent%2C mitochondrial [Source:ZFIN%3BAcc:ZDB-GENE-041111-294]	GO:0006108:malate metabolic process;GO:0055114:oxidation-reduction process;	-	GO:0051287:NAD binding;GO:0046872:metal ion binding;
ENSDARG00000002311	636	0	0	0	0	0	0	0	0	16	16148761	16152199	-	fabp11b	fatty acid binding protein 11b [Source:ZFIN%3BAcc:ZDB-GENE-050522-391]	GO:0034694:response to prostaglandin;GO:0006810:transport;GO:0033552:response to vitamin B3;	-	GO:0005215:transporter activity;GO:0008289:lipid binding;
ENSDARG00000002330	2138	1	0.03	3	0.1	0	0	1	0.03	2	11205795	11210168	+	lhx8a	LIM homeobox 8a [Source:ZFIN%3BAcc:ZDB-GENE-031008-2]	GO:0006355:regulation of transcription, DNA-templated;	GO:0005634:nucleus;	GO:0003700:sequence-specific DNA binding transcription factor activity;GO:0043565:sequence-specific DNA binding;GO:0008270:zinc ion binding;
ENSDARG00000002332	4840	527	7.53	503	7.46	532	6.85	615	7.07	13	36958086	36997761	+	frmd6	FERM domain containing 6 [Source:ZFIN%3BAcc:ZDB-GENE-050522-354]	-	GO:0005856:cytoskeleton;	-
ENSDARG00000002333	1473	108	5.07	99	4.83	110	4.65	123	4.64	20	33752967	33790003	-	fam102bb	family with sequence similarity 102 member Bb [Source:ZFIN%3BAcc:ZDB-GENE-041014-330]	-	-	-
ENSDARG00000002336	3657	1313	24.84	1108	21.76	1271	21.66	1341	20.4	15	20463448	20468302	-	dlc	deltaC [Source:NCBI gene%3BAcc:30120]	GO:0001757:somite specification;GO:0060218:hematopoietic stem cell differentiation;GO:0007219:Notch signaling pathway;GO:0048666:neuron development;	GO:0016021:integral component of membrane;GO:0048471:perinuclear region of cytoplasm;GO:0005886:plasma membrane;	GO:0005509:calcium ion binding;GO:0042802:identical protein binding;GO:0030165:PDZ domain binding;
ENSDARG00000002339	1637	271	11.45	277	12.15	264	10.05	331	11.25	3	15489725	15496610	-	sgf29	SAGA complex associated factor 29 [Source:ZFIN%3BAcc:ZDB-GENE-041010-62]	-	-	-
ENSDARG00000002344	1833	14273	538.68	13832	542.02	16153	549.31	17499	531	14	5861435	5865146	+	tubb4b	tubulin%2C beta 4B class IVb [Source:ZFIN%3BAcc:ZDB-GENE-030131-8625]	GO:0051258:protein polymerization;GO:0007017:microtubule-based process;	GO:0005874:microtubule;GO:0005737:cytoplasm;	GO:0003924:GTPase activity;GO:0005200:structural constituent of cytoskeleton;GO:0005525:GTP binding;
ENSDARG00000002347	2832	4	0.1	2	0.05	8	0.18	5	0.1	25	22319940	22335283	+	cyp11a1	cytochrome P450%2C family 11%2C subfamily A%2C polypeptide 1 [Source:ZFIN%3BAcc:ZDB-GENE-010306-1]	GO:0055114:oxidation-reduction process;GO:0006700:C21-steroid hormone biosynthetic process;GO:0031116:positive regulation of microtubule polymerization;	GO:0005739:mitochondrion;	GO:0009055:electron carrier activity;GO:0008386:cholesterol monooxygenase (side-chain-cleaving) activity;GO:0020037:heme binding;GO:0005506:iron ion binding;
ENSDARG00000002353	3030	17	0.39	23	0.55	18	0.37	31	0.57	17	45404758	45411170	+	tagapa	T cell activation RhoGTPase activating protein a [Source:ZFIN%3BAcc:ZDB-GENE-040426-1877]	GO:0007165:signal transduction;	GO:0005622:intracellular;	-
ENSDARG00000002355	1505	24	1.1	19	0.91	17	0.7	30	1.11	5	42124706	42132825	+	shpk	sedoheptulokinase [Source:ZFIN%3BAcc:ZDB-GENE-060526-357]	-	-	-
ENSDARG00000002362	2717	207	5.27	202	5.34	247	5.67	247	5.06	12	20059859	20120711	-	ubald1a	UBA-like domain containing 1a [Source:NCBI gene%3BAcc:794012]	-	-	-
ENSDARG00000002365	2156	419	13.44	415	13.83	420	12.14	552	14.24	22	5758090	5822147	-	cers5	ceramide synthase 5 [Source:ZFIN%3BAcc:ZDB-GENE-030131-1740]	GO:0006355:regulation of transcription, DNA-templated;	GO:0016021:integral component of membrane;GO:0005634:nucleus;	GO:0003700:sequence-specific DNA binding transcription factor activity;GO:0043565:sequence-specific DNA binding;
ENSDARG00000002369	1650	2057	86.24	2026	88.2	2119	80.05	2573	86.74	5	42064144	42068490	+	UBB	si:ch211-202a12.4 [Source:ZFIN%3BAcc:ZDB-GENE-030131-8486]	-	-	-
ENSDARG00000002377	3021	176	4.03	133	3.16	145	2.99	154	2.84	1	8521323	8532009	+	mief2	mitochondrial elongation factor 2 [Source:ZFIN%3BAcc:ZDB-GENE-060929-864]	-	-	-
ENSDARG00000002385	9714	419	2.98	407	3.01	483	3.1	620	3.55	15	6514964	6650993	-	atm	ATM serine/threonine kinase [Source:ZFIN%3BAcc:ZDB-GENE-040809-1]	GO:0006281:DNA repair;GO:0090399:replicative senescence;GO:0010212:response to ionizing radiation;GO:0016572:histone phosphorylation;GO:0000723:telomere maintenance;GO:0000077:DNA damage checkpoint;GO:0008630:intrinsic apoptotic signaling pathway in response to DNA damage;	GO:0005622:intracellular;	GO:0004674:protein serine/threonine kinase activity;GO:0005524:ATP binding;
ENSDARG00000002391	1076	3	0.19	3	0.2	5	0.29	2	0.1	21	26080215	26089964	-	tlcd1	TLC domain containing 1 [Source:ZFIN%3BAcc:ZDB-GENE-041010-173]	-	GO:0016021:integral component of membrane;	-
ENSDARG00000002394	1530	0	0	0	0	0	0	4	0.15	10	25726694	25728744	+	ugt5d1	UDP glucuronosyltransferase 5 family%2C polypeptide D1 [Source:ZFIN%3BAcc:ZDB-GENE-091118-36]	GO:0008152:metabolic process;	-	GO:0016758:transferase activity, transferring hexosyl groups;
ENSDARG00000002396	2045	210	7.1	208	7.31	230	7.01	252	6.85	24	20194022	20208474	-	cry-dash	cryptochrome DASH [Source:NCBI gene%3BAcc:402986]	GO:0018298:protein-chromophore linkage;GO:0000719:photoreactive repair;GO:0045892:negative regulation of transcription, DNA-templated;	-	GO:0003684:damaged DNA binding;GO:0050660:flavin adenine dinucleotide binding;GO:0003904:deoxyribodipyrimidine photo-lyase activity;
ENSDARG00000002401	4558	768	11.66	847	13.35	903	12.35	966	11.79	17	24877392	24890932	-	gale	UDP-galactose-4-epimerase [Source:ZFIN%3BAcc:ZDB-GENE-060421-6479]	GO:0044237:cellular metabolic process;GO:0006012:galactose metabolic process;	-	GO:0050662:coenzyme binding;GO:0000166:nucleotide binding;GO:0003978:UDP-glucose 4-epimerase activity;
ENSDARG00000002402	2759	762	19.11	741	19.29	853	19.27	916	18.47	6	9595414	9630081	-	ercc3	excision repair cross-complementation group 3 [Source:NCBI gene%3BAcc:324323]	GO:0006366:transcription from RNA polymerase II promoter;GO:0006355:regulation of transcription, DNA-templated;GO:0006283:transcription-coupled nucleotide-excision repair;GO:0006265:DNA topological change;GO:0055114:oxidation-reduction process;	GO:0000439:core TFIIH complex;GO:0005675:holo TFIIH complex;	GO:0020037:heme binding;GO:0009055:electron carrier activity;GO:0016705:oxidoreductase activity, acting on paired donors, with incorporation or reduction of molecular oxygen;GO:0005506:iron ion binding;GO:0003677:DNA binding;GO:0008353:RNA polymerase II carboxy-terminal domain kinase activity;GO:0004003:ATP-dependent DNA helicase activity;GO:0005524:ATP binding;GO:0043138:3'-5' DNA helicase activ…
ENSDARG00000002403	1923	2126	76.48	2086	77.92	2344	75.98	2736	79.14	13	33251721	33256667	-	nusap1	nucleolar and spindle associated protein 1 [Source:NCBI gene%3BAcc:567446]	GO:0040001:establishment of mitotic spindle localization;GO:0000281:mitotic cytokinesis;GO:0007067:mitotic nuclear division;GO:0001755:neural crest cell migration;	GO:0005730:nucleolus;GO:0005876:spindle microtubule;GO:0005737:cytoplasm;	GO:0008017:microtubule binding;GO:0003677:DNA binding;
ENSDARG00000002405	4143	199	3.32	108	1.87	204	3.07	203	2.73	5	20786772	20814588	-	si:ch211-225b11.1	si:ch211-225b11.1 [Source:ZFIN%3BAcc:ZDB-GENE-060531-39]	-	-	-
ENSDARG00000002406	1534	24	1.08	19	0.89	14	0.57	26	0.94	1	22691256	22703383	+	zmynd10	zinc finger%2C MYND-type containing 10 [Source:NCBI gene%3BAcc:393368]	-	-	-
ENSDARG00000002411	3317	104	2.17	74	1.6	98	1.84	113	1.89	11	6684968	6794144	+	pde4cb	phosphodiesterase 4C%2C cAMP-specific b [Source:ZFIN%3BAcc:ZDB-GENE-030131-4075]	-	-	-
ENSDARG00000002445	3694	704	13.18	715	13.9	986	16.64	1118	16.83	16	7430998	7443388	-	prdm1a	PR domain containing 1a%2C with ZNF domain [Source:ZFIN%3BAcc:ZDB-GENE-030131-2193]	GO:0060351:cartilage development involved in endochondral bone morphogenesis;GO:0000122:negative regulation of transcription from RNA polymerase II promoter;GO:0035118:embryonic pectoral fin morphogenesis;GO:0014033:neural crest cell differentiation;GO:0000578:embryonic axis specification;GO:0045666:positive regulation of neuron differentiation;GO:0007521:muscle cell fate determination;GO:0060037…	GO:0005622:intracellular;	GO:0008270:zinc ion binding;GO:0003676:nucleic acid binding;GO:0003700:sequence-specific DNA binding transcription factor activity;
ENSDARG00000002463	3486	385	7.64	291	6	389	6.96	422	6.73	14	24840669	24873654	+	arhgef37	Rho guanine nucleotide exchange factor (GEF) 37 [Source:ZFIN%3BAcc:ZDB-GENE-100514-3]	-	-	-
ENSDARG00000002467	1774	215	8.38	174	7.05	196	6.89	213	6.68	20	9421448	9428021	-	rdh14b	retinol dehydrogenase 14b [Source:ZFIN%3BAcc:ZDB-GENE-030131-6605]	GO:0008152:metabolic process;	-	GO:0016491:oxidoreductase activity;GO:0000166:nucleotide binding;
ENSDARG00000002479	4697	1851	27.26	1705	26.07	2026	26.89	2360	27.95	5	23913585	23926519	+	ercc6l	excision repair cross-complementation group 6-like [Source:NCBI gene%3BAcc:100005291]	GO:0016539:intein-mediated protein splicing;GO:0051301:cell division;GO:0007067:mitotic nuclear division;	GO:0000777:condensed chromosome kinetochore;	GO:0003677:DNA binding;GO:0005524:ATP binding;GO:0004386:helicase activity;
ENSDARG00000002483	1594	17	0.74	17	0.77	44	1.72	70	2.44	23	4414164	4433220	+	wnt7ab	wingless-type MMTV integration site family%2C member 7Ab [Source:ZFIN%3BAcc:ZDB-GENE-100922-44]	-	-	-
ENSDARG00000002487	3002	1406	32.4	1340	32.06	1606	33.35	1814	33.61	12	5399680	5418340	-	noc3l	NOC3-like DNA replication regulator [Source:NCBI gene%3BAcc:321289]	GO:0007517:muscle organ development;GO:0019216:regulation of lipid metabolic process;	GO:0005730:nucleolus;	-
ENSDARG00000002494	5168	207	2.77	232	3.22	255	3.08	284	3.06	11	10975012	11020857	+	itgb6	integrin%2C beta 6 [Source:ZFIN%3BAcc:ZDB-GENE-100812-2]	GO:0007160:cell-matrix adhesion;GO:0007229:integrin-mediated signaling pathway;GO:0007275:multicellular organismal development;	GO:0008305:integrin complex;	GO:0004872:receptor activity;
ENSDARG00000002506	1324	665	34.75	640	34.72	681	32.06	813	34.15	7	41873080	41881238	-	C7H16orf87	zgc:92818 [Source:NCBI gene%3BAcc:436785]	-	-	-
ENSDARG00000002507	8704	142	1.13	97	0.8	116	0.83	149	0.95	16	14276364	14353567	-	itga10	integrin%2C alpha 10 [Source:ZFIN%3BAcc:ZDB-GENE-100922-54]	GO:0007155:cell adhesion;GO:0007229:integrin-mediated signaling pathway;	GO:0008305:integrin complex;	-
ENSDARG00000002508	2257	7	0.21	2	0.06	4	0.11	6	0.15	6	39279104	39286029	+	ankrd33ab	ankyrin repeat domain 33Ab [Source:ZFIN%3BAcc:ZDB-GENE-100729-1]	-	-	-
ENSDARG00000002509	1683	1	0.04	5	0.21	9	0.33	3	0.1	13	35974362	35976986	-	zgc:153911	zgc:153911 [Source:ZFIN%3BAcc:ZDB-GENE-061013-174]	-	GO:0016021:integral component of membrane;	-
ENSDARG00000002510	1430	104	5.03	81	4.07	91	3.97	136	5.29	6	3563890	3573716	-	dmbx1b	diencephalon/mesencephalon homeobox 1b [Source:NCBI gene%3BAcc:550288]	GO:0051726:regulation of cell cycle;GO:0006355:regulation of transcription, DNA-templated;GO:0030901:midbrain development;GO:0060041:retina development in camera-type eye;GO:0050767:regulation of neurogenesis;	GO:0005634:nucleus;	GO:0043565:sequence-specific DNA binding;GO:0003700:sequence-specific DNA binding transcription factor activity;
ENSDARG00000002523	5682	1655	20.15	1579	19.96	1817	19.93	2061	20.18	10	11260170	11283239	+	hsdl2	hydroxysteroid dehydrogenase like 2 [Source:NCBI gene%3BAcc:322347]	GO:0055114:oxidation-reduction process;	GO:0005777:peroxisome;	GO:0016491:oxidoreductase activity;GO:0032934:sterol binding;GO:0000166:nucleotide binding;
ENSDARG00000002533	1602	77	3.33	76	3.41	67	2.61	83	2.88	5	62781626	62801879	-	adora2b	adenosine A2b receptor [Source:ZFIN%3BAcc:ZDB-GENE-060511-1]	GO:0001973:adenosine receptor signaling pathway;	GO:0016021:integral component of membrane;	GO:0001609:G-protein coupled adenosine receptor activity;
ENSDARG00000002536	2466	1571	44.07	1461	42.55	1591	40.22	1831	41.3	23	7548797	7578892	+	tm9sf4	transmembrane 9 superfamily protein member 4 [Source:ZFIN%3BAcc:ZDB-GENE-040426-1575]	-	GO:0016021:integral component of membrane;	-
ENSDARG00000002538	2223	1381	42.98	1432	46.27	1624	45.54	1884	47.14	14	6228996	6245748	+	smu1a	SMU1 DNA replication regulator and spliceosomal factor a [Source:NCBI gene%3BAcc:393168]	-	GO:0005634:nucleus;GO:0005737:cytoplasm;	-
ENSDARG00000002546	2747	72	1.81	74	1.93	112	2.54	132	2.67	12	9817440	9840819	+	rundc3ab	RUN domain containing 3Ab [Source:NCBI gene%3BAcc:393118]	-	-	-
ENSDARG00000002549	4121	151	2.53	156	2.72	155	2.34	199	2.69	19	22622355	22664398	-	eif3eb	eukaryotic translation initiation factor 3%2C subunit E%2C b [Source:NCBI gene%3BAcc:561049]	GO:0006413:translational initiation;	GO:0005852:eukaryotic translation initiation factor 3 complex;GO:0005634:nucleus;GO:0005737:cytoplasm;	GO:0003743:translation initiation factor activity;
ENSDARG00000002552	3310	1629	34.05	1621	35.18	1757	33.09	1900	31.93	11	21154678	21218172	-	mapkapk2a	MAPK activated protein kinase 2a [Source:ZFIN%3BAcc:ZDB-GENE-030131-5532]	-	-	-
ENSDARG00000002564	1366	114	5.77	85	4.47	118	5.38	163	6.64	3	21251627	21280373	-	syngr1a	synaptogyrin 1a [Source:ZFIN%3BAcc:ZDB-GENE-041010-169]	-	GO:0016021:integral component of membrane;	-
ENSDARG00000002571	1476	337	15.8	269	13.09	345	14.57	427	16.09	18	39327010	39382869	+	tmod2	tropomodulin 2 [Source:ZFIN%3BAcc:ZDB-GENE-040912-185]	-	-	-
ENSDARG00000002576	1554	3	0.13	8	0.37	6	0.24	6	0.21	12	3848109	3861759	+	cabp5a	calcium binding protein 5a [Source:ZFIN%3BAcc:ZDB-GENE-040426-1655]	-	-	GO:0005509:calcium ion binding;
ENSDARG00000002582	8686	258	2.05	265	2.19	176	1.26	254	1.63	9	21030930	21067971	-	tbx15	T-box transcription factor 15 [Source:ZFIN%3BAcc:ZDB-GENE-020529-1]	GO:0006355:regulation of transcription, DNA-templated;	GO:0005634:nucleus;	GO:0003700:sequence-specific DNA binding transcription factor activity;GO:0003677:DNA binding;
ENSDARG00000002587	5438	1068	13.59	1128	14.9	1225	14.04	1313	13.43	21	42970983	43022048	-	dpysl3	dihydropyrimidinase like 3 [Source:NCBI gene%3BAcc:553166]	GO:0048936:peripheral nervous system neuron axonogenesis;GO:0006208:pyrimidine nucleobase catabolic process;	GO:0030426:growth cone;GO:0005737:cytoplasm;	GO:0016812:hydrolase activity, acting on carbon-nitrogen (but not peptide) bonds, in cyclic amides;
ENSDARG00000002589	839	634	52.28	674	57.7	848	63	762	50.52	12	15002757	15010996	+	mylpfb	myosin light chain%2C phosphorylatable%2C fast skeletal muscle b [Source:ZFIN%3BAcc:ZDB-GENE-040912-115]	-	-	GO:0005509:calcium ion binding;
ENSDARG00000002591	1898	1727	62.95	1849	69.97	2160	70.94	2852	83.58	6	40832635	40841032	+	ruvbl1	RuvB-like AAA ATPase 1 [Source:NCBI gene%3BAcc:317679]	GO:0006310:DNA recombination;GO:0006355:regulation of transcription, DNA-templated;GO:0060420:regulation of heart growth;GO:0006281:DNA repair;	GO:0031011:Ino80 complex;GO:0071339:MLL1 complex;	GO:0043141:ATP-dependent 5'-3' DNA helicase activity;GO:0005524:ATP binding;
ENSDARG00000002593	1745	127	5.03	132	5.43	171	6.11	194	6.18	21	19445942	19484289	+	slc45a2	solute carrier family 45 member 2 [Source:ZFIN%3BAcc:ZDB-GENE-050208-97]	GO:0009416:response to light stimulus;	-	-
ENSDARG00000002597	2715	0	0	3	0.08	5	0.11	2	0.04	8	45334255	45352219	+	pabpc1l	poly(A) binding protein%2C cytoplasmic 1-like [Source:ZFIN%3BAcc:ZDB-GENE-030131-5836]	-	-	GO:0000166:nucleotide binding;GO:0003723:RNA binding;
ENSDARG00000002600	2516	10	0.27	7	0.2	14	0.35	18	0.4	21	11684830	11722343	+	pcsk1	proprotein convertase subtilisin/kexin type 1 [Source:ZFIN%3BAcc:ZDB-GENE-071009-1]	GO:0006508:proteolysis;	-	GO:0004252:serine-type endopeptidase activity;
ENSDARG00000002601	1187	208	12.12	243	14.7	217	11.4	234	10.97	23	37815645	37816969	+	irx7	iroquois homeobox 7 [Source:ZFIN%3BAcc:ZDB-GENE-020103-1]	GO:0006355:regulation of transcription, DNA-templated;GO:0060059:embryonic retina morphogenesis in camera-type eye;GO:0010842:retina layer formation;GO:0021575:hindbrain morphogenesis;GO:0030182:neuron differentiation;	GO:0005634:nucleus;	GO:0043565:sequence-specific DNA binding;GO:0003700:sequence-specific DNA binding transcription factor activity;
ENSDARG00000002607	4467	45	0.7	39	0.63	52	0.73	75	0.93	11	26476153	26562346	+	unm_sa1614	un-named sa1614 [Source:ZFIN%3BAcc:ZDB-GENE-120411-1]	-	-	-
ENSDARG00000002609	5711	312	3.78	318	4	374	4.08	423	4.12	14	34966598	35012162	+	rnf145a	ring finger protein 145a [Source:ZFIN%3BAcc:ZDB-GENE-111012-3]	-	-	-
ENSDARG00000002613	643	644	69.29	765	85.46	859	83.27	872	75.43	19	25465025	25467185	+	rpa3	replication protein A3 [Source:ZFIN%3BAcc:ZDB-GENE-040426-977]	-	-	-
ENSDARG00000002632	2919	1591	37.71	1554	38.24	1887	40.3	1650	31.44	12	48815988	48837308	+	anxa11b	annexin A11b [Source:ZFIN%3BAcc:ZDB-GENE-030707-5]	-	-	GO:0005509:calcium ion binding;GO:0005544:calcium-dependent phospholipid binding;
ENSDARG00000002634	1123	123	7.58	107	6.84	142	7.88	188	9.31	1	12141876	12161148	-	b4galt1	UDP-Gal:betaGlcNAc beta 1%2C4- galactosyltransferase%2C polypeptide 1 [Source:ZFIN%3BAcc:ZDB-GENE-050417-236]	GO:0005975:carbohydrate metabolic process;GO:0042074:cell migration involved in gastrulation;GO:0048570:notochord morphogenesis;	-	GO:0008378:galactosyltransferase activity;
ENSDARG00000002635	3814	9	0.16	5	0.09	3	0.05	18	0.26	17	15309432	15382704	-	zgc:85722	zgc:85722 [Source:ZFIN%3BAcc:ZDB-GENE-040516-7]	-	-	-
ENSDARG00000002642	2318	708	21.13	633	19.61	770	20.71	1031	24.74	8	18842278	18880399	-	sh3gl1b	SH3-domain GRB2-like 1b [Source:ZFIN%3BAcc:ZDB-GENE-031001-6]	-	GO:0005737:cytoplasm;	-
ENSDARG00000002644	3255	66	1.4	94	2.07	66	1.26	63	1.08	6	35387367	35439406	-	rgs5a	regulator of G protein signaling 5a [Source:ZFIN%3BAcc:ZDB-GENE-030131-7570]	GO:0038032:termination of G-protein coupled receptor signaling pathway;GO:0043547:positive regulation of GTPase activity;	GO:0005737:cytoplasm;GO:0005886:plasma membrane;	GO:0005096:GTPase activator activity;
ENSDARG00000002656	7466	51	0.47	57	0.55	52	0.43	65	0.48	20	31745949	31905968	-	stxbp5a	syntaxin binding protein 5a (tomosyn) [Source:ZFIN%3BAcc:ZDB-GENE-041001-161]	GO:0016192:vesicle-mediated transport;	GO:0016021:integral component of membrane;	-
ENSDARG00000002659	4918	4012	56.44	3765	54.99	4320	54.75	4719	53.37	23	9794730	9807578	-	mapre1b	microtubule-associated protein%2C RP/EB family%2C member 1b [Source:ZFIN%3BAcc:ZDB-GENE-040426-2256]	-	-	GO:0008017:microtubule binding;
ENSDARG00000002663	2455	328	9.24	347	10.15	379	9.62	466	10.56	4	8016457	8027318	+	optn	optineurin [Source:NCBI gene%3BAcc:336159]	-	GO:0005737:cytoplasm;	GO:0008270:zinc ion binding;
ENSDARG00000002666	1527	27	1.22	41	1.93	42	1.71	37	1.35	10	39304422	39307819	+	kcnj1b	potassium inwardly rectifying channel subfamily J member 1b [Source:ZFIN%3BAcc:ZDB-GENE-070620-9]	GO:0034765:regulation of ion transmembrane transport;GO:0006813:potassium ion transport;	GO:0016021:integral component of membrane;	GO:0005242:inward rectifier potassium channel activity;
ENSDARG00000002670	2864	302	7.29	322	8.08	334	7.27	411	7.98	17	10748366	10766679	+	ATG14	zgc:113944 [Source:ZFIN%3BAcc:ZDB-GENE-050913-155]	GO:0010508:positive regulation of autophagy;	-	-
ENSDARG00000002682	6479	246	2.63	253	2.8	246	2.37	252	2.16	15	20940904	20956454	-	tbcela	tubulin folding cofactor E-like a [Source:ZFIN%3BAcc:ZDB-GENE-040426-1719]	-	-	-
ENSDARG00000002685	2039	3	0.1	6	0.21	3	0.09	2	0.05	7	24830576	24838857	-	fam113	family with sequence similarity 113 [Source:ZFIN%3BAcc:ZDB-GENE-041212-23]	-	-	GO:0016787:hydrolase activity;
ENSDARG00000002690	1316	244	12.83	191	10.42	209	9.9	305	12.89	11	24815667	24817637	+	rabif	RAB interacting factor [Source:ZFIN%3BAcc:ZDB-GENE-040718-216]	GO:0007264:small GTPase mediated signal transduction;	-	GO:0005085:guanyl-nucleotide exchange factor activity;
ENSDARG00000002696	2642	5	0.13	1	0.03	2	0.05	3	0.06	19	5106226	5135345	-	gnb3b	guanine nucleotide binding protein (G protein)%2C beta polypeptide 3b [Source:ZFIN%3BAcc:ZDB-GENE-040426-2280]	-	-	-
ENSDARG00000002701	4625	5	0.07	7	0.11	5	0.07	4	0.05	7	13756215	13782279	+	rasl12	RAS-like%2C family 12 [Source:NCBI gene%3BAcc:393366]	GO:0007264:small GTPase mediated signal transduction;	GO:0016020:membrane;	GO:0003924:GTPase activity;GO:0005525:GTP binding;
ENSDARG00000002707	1166	38	2.25	32	1.97	38	2.03	38	1.81	14	30538482	30540967	-	her11	hairy-related 11 [Source:ZFIN%3BAcc:ZDB-GENE-040824-4]	GO:0030917:midbrain-hindbrain boundary development;GO:0050768:negative regulation of neurogenesis;	-	GO:0046982:protein heterodimerization activity;
ENSDARG00000002710	3574	25958	502.45	26685	536.3	30137	525.62	36755	572.02	22	36673312	36690751	-	ncl	nucleolin [Source:ZFIN%3BAcc:ZDB-GENE-030131-6986]	-	-	GO:0003676:nucleic acid binding;GO:0000166:nucleotide binding;
ENSDARG00000002720	1974	922	32.31	1024	37.26	1160	36.63	1357	38.24	18	7037349	7056760	-	utp15	UTP15 small subunit processome component [Source:NCBI gene%3BAcc:325106]	GO:0045766:positive regulation of angiogenesis;GO:0006364:rRNA processing;	GO:0005730:nucleolus;	-
ENSDARG00000002722	888	0	0	0	0	0	0	0	0	13	40729618	40741005	+	ankrd2	ankyrin repeat domain 2 (stretch responsive muscle) [Source:ZFIN%3BAcc:ZDB-GENE-090313-383]	-	-	-
ENSDARG00000002728	1101	0	0	0	0	0	0	0	0	2	33796207	33821163	+	kiss1ra	KISS1 receptor a [Source:ZFIN%3BAcc:ZDB-GENE-070912-521]	GO:0007186:G-protein coupled receptor signaling pathway;	GO:0016021:integral component of membrane;	GO:0008188:neuropeptide receptor activity;
ENSDARG00000002731	1375	1352	68.02	1110	57.98	1449	65.69	1626	65.78	19	47191005	47276297	-	sdc2	syndecan 2 [Source:ZFIN%3BAcc:ZDB-GENE-021206-3]	GO:0055113:epiboly involved in gastrulation with mouth forming second;GO:0043206:extracellular fibril organization;GO:0002040:sprouting angiogenesis;GO:0048565:digestive tract development;GO:0060973:cell migration involved in heart development;	GO:0016021:integral component of membrane;	GO:0008092:cytoskeletal protein binding;
ENSDARG00000002732	2218	14	0.44	14	0.45	19	0.53	24	0.6	14	17376940	17382534	+	spon2b	spondin 2b%2C extracellular matrix protein [Source:ZFIN%3BAcc:ZDB-GENE-990415-161]	-	GO:0005578:proteinaceous extracellular matrix;	-
ENSDARG00000002745	2382	1683	48.88	1541	46.47	1770	46.32	2183	50.98	20	18992679	18998022	+	tdh	L-threonine dehydrogenase [Source:ZFIN%3BAcc:ZDB-GENE-040426-2379]	GO:0044237:cellular metabolic process;	-	GO:0000166:nucleotide binding;GO:0050662:coenzyme binding;GO:0003824:catalytic activity;
ENSDARG00000002748	3378	122	2.5	142	3.02	177	3.27	177	2.91	19	390298	417381	+	sema6d	sema domain%2C transmembrane domain (TM)%2C and cytoplasmic domain%2C (semaphorin) 6D [Source:ZFIN%3BAcc:ZDB-GENE-040426-1933]	GO:0007275:multicellular organismal development;	GO:0016021:integral component of membrane;	GO:0004872:receptor activity;
ENSDARG00000002750	4361	209	3.32	244	4.02	278	3.97	309	3.94	11	25044082	25063586	+	phf20a	PHD finger protein 20%2C a [Source:ZFIN%3BAcc:ZDB-GENE-070912-270]	-	-	-
ENSDARG00000002754	1164	173	10.28	165	10.18	181	9.69	214	10.23	25	30442389	30454772	+	pdcd2l	programmed cell death 2-like [Source:ZFIN%3BAcc:ZDB-GENE-040426-967]	-	GO:0005737:cytoplasm;	-
ENSDARG00000002758	3983	297	5.16	247	4.45	278	4.35	306	4.27	16	10841163	10863041	+	dedd1	death effector domain-containing 1 [Source:ZFIN%3BAcc:ZDB-GENE-000616-2]	GO:0042981:regulation of apoptotic process;	-	-
ENSDARG00000002760	2754	0	0	0	0	0	0	1	0.02	6	52637308	52661824	-	gdf5	growth differentiation factor 5 [Source:ZFIN%3BAcc:ZDB-GENE-990415-39]	-	-	-
ENSDARG00000002764	1311	124	6.54	92	5.04	142	6.75	204	8.66	18	6732195	6742287	-	miox	myo-inositol oxygenase [Source:NCBI gene%3BAcc:571850]	GO:0019310:inositol catabolic process;GO:0055114:oxidation-reduction process;	GO:0005737:cytoplasm;	GO:0008199:ferric iron binding;GO:0050113:inositol oxygenase activity;
ENSDARG00000002768	1181	627	36.73	572	34.79	826	43.6	827	38.95	12	17710425	17712498	-	pvalb2	parvalbumin 2 [Source:NCBI gene%3BAcc:58028]	-	-	GO:0005509:calcium ion binding;
ENSDARG00000002771	6692	4	0.04	8	0.09	3	0.03	6	0.05	5	28045764	28109416	-	si:ch211-48m9.1	si:ch211-48m9.1 [Source:ZFIN%3BAcc:ZDB-GENE-060531-64]	-	-	-
ENSDARG00000002779	1117	19	1.18	17	1.09	52	2.9	48	2.39	24	21684189	21686706	+	pdx1	pancreatic and duodenal homeobox 1 [Source:ZFIN%3BAcc:ZDB-GENE-990415-122]	GO:0031018:endocrine pancreas development;GO:0006355:regulation of transcription, DNA-templated;GO:0071907:determination of digestive tract left/right asymmetry;GO:0071910:determination of liver left/right asymmetry;GO:0035469:determination of pancreatic left/right asymmetry;	GO:0005634:nucleus;	GO:0043565:sequence-specific DNA binding;GO:0003700:sequence-specific DNA binding transcription factor activity;
ENSDARG00000002787	4159	1614	26.85	1586	27.39	1591	23.85	1975	26.41	18	20225961	20257511	+	tle3a	TLE family member 3%2C transcriptional corepressor a [Source:NCBI gene%3BAcc:30206]	GO:0006355:regulation of transcription, DNA-templated;GO:1900052:regulation of retinoic acid biosynthetic process;	GO:0005634:nucleus;	GO:0005515:protein binding;
ENSDARG00000002790	2300	3002	90.29	3002	93.75	3084	83.58	3436	83.09	2	9789811	9818711	-	ap2m1a	adaptor related protein complex 2 subunit mu 1a [Source:NCBI gene%3BAcc:321051]	GO:0016192:vesicle-mediated transport;GO:0006886:intracellular protein transport;GO:0007411:axon guidance;GO:0042059:negative regulation of epidermal growth factor receptor signaling pathway;GO:0016032:viral process;GO:0048011:neurotrophin TRK receptor signaling pathway;GO:0019886:antigen processing and presentation of exogenous peptide antigen via MHC class II;GO:0050690:regulation of defense re…	GO:0030131:clathrin adaptor complex;GO:0030132:clathrin coat of coated pit;GO:0030669:clathrin-coated endocytic vesicle membrane;GO:0005765:lysosomal membrane;GO:0005829:cytosol;GO:0005739:mitochondrion;GO:0030141:secretory granule;	GO:0008289:lipid binding;GO:0005515:protein binding;GO:0005215:transporter activity;
ENSDARG00000002791	4285	7653	123.55	6990	117.17	8367	121.71	9585	124.42	1	1712140	1793371	+	atp1a1a.1	ATPase Na+/K+ transporting subunit alpha 1a%2C tandem duplicate 1 [Source:ZFIN%3BAcc:ZDB-GENE-001212-1]	GO:0048840:otolith development;GO:0030916:otic vesicle formation;GO:0015672:monovalent inorganic cation transport;GO:0030917:midbrain-hindbrain boundary development;GO:0030198:extracellular matrix organization;GO:0006754:ATP biosynthetic process;GO:0003143:embryonic heart tube morphogenesis;GO:0035051:cardiocyte differentiation;GO:0007368:determination of left/right symmetry;GO:0010172:embryonic …	GO:0005887:integral component of plasma membrane;	GO:0046872:metal ion binding;GO:0005391:sodium:potassium-exchanging ATPase activity;GO:0005524:ATP binding;GO:0000166:nucleotide binding;GO:0043167:ion binding;
ENSDARG00000002792	3038	1630	37.12	1650	39.01	1781	36.54	2082	38.12	5	30502249	30516646	-	arcn1a	archain 1a [Source:ZFIN%3BAcc:ZDB-GENE-021031-2]	GO:0006890:retrograde vesicle-mediated transport, Golgi to ER;GO:0006886:intracellular protein transport;	GO:0030131:clathrin adaptor complex;GO:0030126:COPI vesicle coat;	-
ENSDARG00000002795	2373	866	25.25	847	25.64	1286	33.78	1368	32.07	15	6838039	6863317	-	meis3	myeloid ecotropic viral integration site 3 [Source:ZFIN%3BAcc:ZDB-GENE-010406-2]	GO:0045944:positive regulation of transcription from RNA polymerase II promoter;GO:0031017:exocrine pancreas development;GO:0030902:hindbrain development;	GO:0005737:cytoplasm;GO:0005634:nucleus;	GO:0043565:sequence-specific DNA binding;GO:0005515:protein binding;GO:0003700:sequence-specific DNA binding transcription factor activity;
ENSDARG00000002797	1764	5	0.2	6	0.24	5	0.18	6	0.19	3	3693417	3695256	+	BX908804.1	-	-	-	-
ENSDARG00000002798	2210	156	4.88	202	6.57	201	5.67	220	5.54	18	5850837	5859484	+	cog8	component of oligomeric golgi complex 8 [Source:ZFIN%3BAcc:ZDB-GENE-050320-74]	-	GO:0017119:Golgi transport complex;	-
ENSDARG00000002816	4119	3	0.05	0	0	0	0	1	0.01	5	51443009	51581775	+	rasgrf2b	Ras protein-specific guanine nucleotide-releasing factor 2b [Source:NCBI gene%3BAcc:553520]	GO:0035023:regulation of Rho protein signal transduction;	GO:0005789:endoplasmic reticulum membrane;GO:0005886:plasma membrane;	GO:0005089:Rho guanyl-nucleotide exchange factor activity;GO:0005543:phospholipid binding;GO:0005516:calmodulin binding;
ENSDARG00000002826	1909	298	10.8	309	11.63	332	10.84	381	11.1	20	32141562	32149020	-	cep57l1	centrosomal protein 57%2C like 1 [Source:ZFIN%3BAcc:ZDB-GENE-040808-27]	GO:0034453:microtubule anchoring;	-	GO:0015631:tubulin binding;GO:0043015:gamma-tubulin binding;GO:0042802:identical protein binding;GO:0008017:microtubule binding;
ENSDARG00000002830	2466	421	11.81	410	11.94	496	12.54	587	13.24	5	24532401	24543526	-	trmt2a	tRNA methyltransferase 2 homolog A [Source:ZFIN%3BAcc:ZDB-GENE-030131-6876]	GO:0032259:methylation;GO:0006396:RNA processing;	-	GO:0003676:nucleic acid binding;GO:0008173:RNA methyltransferase activity;GO:0000166:nucleotide binding;
ENSDARG00000002831	10607	394	2.57	285	1.93	442	2.6	558	2.93	15	35951888	36055401	-	col4a4	collagen%2C type IV%2C alpha 4 [Source:ZFIN%3BAcc:ZDB-GENE-101001-1]	-	GO:0005581:collagen trimer;	GO:0005201:extracellular matrix structural constituent;
ENSDARG00000002840	5496	332	4.18	242	3.16	300	3.4	363	3.67	1	44651727	44704261	-	si:dkey-28b4.8	si:dkey-28b4.8 [Source:ZFIN%3BAcc:ZDB-GENE-090501-2]	GO:0006816:calcium ion transport;	GO:0016021:integral component of membrane;	GO:0046872:metal ion binding;GO:0005524:ATP binding;GO:0005388:calcium-transporting ATPase activity;
ENSDARG00000002847	6152	43	0.48	37	0.43	35	0.35	24	0.22	20	31002188	31067306	-	fndc1	fibronectin type III domain containing 1 [Source:ZFIN%3BAcc:ZDB-GENE-041210-332]	-	-	-
ENSDARG00000002872	2503	171	4.73	194	5.57	187	4.66	250	5.56	3	52647144	52661242	-	zgc:113210	zgc:113210 [Source:ZFIN%3BAcc:ZDB-GENE-050320-83]	-	-	-
ENSDARG00000002877	6020	584	6.71	557	6.65	747	7.73	855	7.9	20	39223235	39259880	+	reps1	RALBP1 associated Eps domain containing 1 [Source:ZFIN%3BAcc:ZDB-GENE-030131-9536]	GO:0006898:receptor-mediated endocytosis;	-	GO:0005509:calcium ion binding;
ENSDARG00000002880	4161	251	4.17	180	3.11	211	3.16	268	3.58	19	40379874	40686675	+	vps50	VPS50 EARP/GARPII complex subunit [Source:ZFIN%3BAcc:ZDB-GENE-060503-325]	-	-	-
ENSDARG00000002894	2401	423	12.19	397	11.88	399	10.36	461	10.68	20	29231556	29269362	+	aven	apoptosis%2C caspase activation inhibitor [Source:ZFIN%3BAcc:ZDB-GENE-041001-171]	-	-	-
ENSDARG00000002897	3939	97	1.7	81	1.48	103	1.63	143	2.02	11	2616816	2632747	-	si:ch211-160o17.2	si:ch211-160o17.2 [Source:ZFIN%3BAcc:ZDB-GENE-141219-3]	-	-	-
ENSDARG00000002909	4575	838	12.67	730	11.46	902	12.29	1032	12.55	22	17657612	17688873	-	tjp3	tight junction protein 3 [Source:ZFIN%3BAcc:ZDB-GENE-030828-10]	-	-	-
ENSDARG00000002912	3187	437	9.49	435	9.8	525	10.27	453	7.91	11	24800156	24815193	+	adipor1a	adiponectin receptor 1a [Source:ZFIN%3BAcc:ZDB-GENE-040718-169]	-	-	-
ENSDARG00000002916	4867	326	4.63	289	4.27	358	4.59	432	4.94	12	48419226	48467781	-	sec31b	SEC31 homolog B%2C COPII coat complex component [Source:ZFIN%3BAcc:ZDB-GENE-060418-2]	-	-	-
ENSDARG00000002917	2244	3	0.09	1	0.03	7	0.19	6	0.15	22	10098446	10110988	-	gls2b	glutaminase 2b (liver%2C mitochondrial) [Source:ZFIN%3BAcc:ZDB-GENE-050208-408]	GO:0006541:glutamine metabolic process;	-	GO:0004359:glutaminase activity;
ENSDARG00000002933	2095	248	8.19	228	7.82	271	8.06	306	8.12	6	16031189	16034286	+	gbx2	gastrulation brain homeobox 2 [Source:ZFIN%3BAcc:ZDB-GENE-020509-2]	GO:0006355:regulation of transcription, DNA-templated;GO:0030902:hindbrain development;	GO:0005634:nucleus;	GO:0043565:sequence-specific DNA binding;GO:0003700:sequence-specific DNA binding transcription factor activity;
ENSDARG00000002937	2937	568	13.38	715	17.49	854	18.12	997	18.88	1	51475094	51525086	+	meis1a	Meis homeobox 1 a [Source:ZFIN%3BAcc:ZDB-GENE-020122-3]	GO:0006355:regulation of transcription, DNA-templated;	GO:0005634:nucleus;	GO:0003677:DNA binding;GO:0003700:sequence-specific DNA binding transcription factor activity;GO:0043565:sequence-specific DNA binding;
ENSDARG00000002945	3042	6	0.14	2	0.05	13	0.27	17	0.31	23	20014030	20051369	-	bgnb	biglycan b [Source:ZFIN%3BAcc:ZDB-GENE-040426-21]	-	-	-
ENSDARG00000002947	2389	374	10.83	324	9.74	359	9.37	424	9.87	2	15109528	15125512	-	abcd3b	ATP-binding cassette%2C sub-family D (ALD)%2C member 3b [Source:ZFIN%3BAcc:ZDB-GENE-050517-29]	GO:0055085:transmembrane transport;	GO:0016021:integral component of membrane;	GO:0042626:ATPase activity, coupled to transmembrane movement of substances;GO:0005524:ATP binding;
ENSDARG00000002949	1773	1285	50.14	1366	55.34	1594	56.04	1666	52.27	5	31983098	31995401	+	ppp6c	protein phosphatase 6%2C catalytic subunit [Source:ZFIN%3BAcc:ZDB-GENE-040426-949]	GO:0000082:G1/S transition of mitotic cell cycle;GO:0006470:protein dephosphorylation;	GO:0005829:cytosol;	GO:0046872:metal ion binding;GO:0004722:protein serine/threonine phosphatase activity;GO:0005515:protein binding;
ENSDARG00000002952	6212	2526	28.13	2386	27.59	2934	29.44	2995	26.82	4	14971239	14979937	+	smo	smoothened%2C frizzled class receptor [Source:ZFIN%3BAcc:ZDB-GENE-980526-89]	GO:0021696:cerebellar cortex morphogenesis;GO:0035143:caudal fin morphogenesis;GO:0060844:arterial endothelial cell fate commitment;GO:0002053:positive regulation of mesenchymal cell proliferation;GO:0021520:spinal cord motor neuron cell fate specification;GO:0021523:somatic motor neuron differentiation;GO:0008406:gonad development;GO:0042693:muscle cell fate commitment;GO:0009952:anterior/poster…	GO:0005886:plasma membrane;GO:0005737:cytoplasm;GO:0016021:integral component of membrane;GO:0005929:cilium;GO:0043025:neuronal cell body;	GO:0004930:G-protein coupled receptor activity;GO:0017147:Wnt-protein binding;GO:0042813:Wnt-activated receptor activity;GO:0030165:PDZ domain binding;
ENSDARG00000002956	5121	19	0.26	20	0.28	14	0.17	15	0.16	12	4114401	4145033	+	si:dkey-32n7.4	si:dkey-32n7.4 [Source:ZFIN%3BAcc:ZDB-GENE-110411-175]	-	-	-
ENSDARG00000002959	1353	0	0	0	0	0	0	0	0	9	33417969	33419321	+	gpr34b	G protein-coupled receptor 34b [Source:ZFIN%3BAcc:ZDB-GENE-040823-1]	GO:0035589:G-protein coupled purinergic nucleotide receptor signaling pathway;	GO:0005887:integral component of plasma membrane;	GO:0045028:G-protein coupled purinergic nucleotide receptor activity;
ENSDARG00000002967	1421	243	11.83	259	13.09	337	14.78	370	14.48	3	40277704	40284744	-	pdap1b	pdgfa associated protein 1b [Source:ZFIN%3BAcc:ZDB-GENE-040426-942]	-	-	-
ENSDARG00000002968	2584	728	19.49	782	21.74	905	21.83	1138	24.5	12	6160446	6177894	-	a1cf	apobec1 complementation factor [Source:ZFIN%3BAcc:ZDB-GENE-060824-3]	-	-	GO:0003725:double-stranded RNA binding;GO:0000166:nucleotide binding;
ENSDARG00000002970	2085	1579	52.39	1519	52.33	1651	49.36	2093	55.84	2	1348281	1364678	-	ss18	SS18 subunit of BAF chromatin remodeling complex [Source:ZFIN%3BAcc:ZDB-GENE-030131-4867]	-	-	-
ENSDARG00000002971	4515	616	9.44	625	9.94	708	9.77	872	10.74	16	31942527	31960652	+	phc1	polyhomeotic homolog 1 [Source:ZFIN%3BAcc:ZDB-GENE-081022-39]	-	-	-
ENSDARG00000002986	1935	5	0.18	2	0.07	4	0.13	1	0.03	5	25708369	25723079	-	gda	guanine deaminase [Source:ZFIN%3BAcc:ZDB-GENE-050522-434]	GO:0006147:guanine catabolic process;	-	GO:0008892:guanine deaminase activity;GO:0008270:zinc ion binding;
ENSDARG00000002988	968	52	3.72	54	4.01	48	3.09	82	4.71	25	20215964	20226584	+	tnnt2d	troponin T2d%2C cardiac [Source:ZFIN%3BAcc:ZDB-GENE-050626-97]	GO:0045214:sarcomere organization;	GO:0005861:troponin complex;	-
ENSDARG00000002991	4259	558	9.06	520	8.77	587	8.59	718	9.38	20	25711718	25735315	+	cep135	centrosomal protein 135 [Source:NCBI gene%3BAcc:553303]	GO:0010457:centriole-centriole cohesion;GO:0007099:centriole replication;	GO:0005814:centriole;	-
ENSDARG00000002994	3331	468	9.72	478	10.31	543	10.16	610	10.19	21	21279159	21298995	+	itpkca	inositol-trisphosphate 3-kinase Ca [Source:ZFIN%3BAcc:ZDB-GENE-030131-6009]	-	-	-
ENSDARG00000003008	4572	368	5.57	352	5.53	412	5.62	456	5.55	12	25640480	25770232	+	prkcea	protein kinase C%2C epsilon a [Source:ZFIN%3BAcc:ZDB-GENE-030131-8191]	-	-	-
ENSDARG00000003017	1820	539	20.49	549	21.67	606	20.76	614	18.76	9	8968702	8972763	+	ube2al	ubiquitin conjugating enzyme E2 A%2C like [Source:ZFIN%3BAcc:ZDB-GENE-030131-4195]	-	-	GO:0016881:acid-amino acid ligase activity;
ENSDARG00000003020	1935	35	1.25	33	1.22	32	1.03	48	1.38	18	10296228	10298162	-	lrrc4.2	leucine rich repeat containing 4.2 [Source:ZFIN%3BAcc:ZDB-GENE-030131-7997]	-	-	-
ENSDARG00000003021	2393	406	11.74	404	12.13	440	11.46	489	11.37	7	51656099	51710015	-	hdac8	histone deacetylase 8 [Source:NCBI gene%3BAcc:406740]	GO:0006355:regulation of transcription, DNA-templated;GO:0016575:histone deacetylation;GO:0005977:glycogen metabolic process;	GO:0005737:cytoplasm;GO:0005634:nucleus;	GO:0005516:calmodulin binding;GO:0004553:hydrolase activity, hydrolyzing O-glycosyl compounds;GO:0046872:metal ion binding;GO:0032041:NAD-dependent histone deacetylase activity (H3-K14 specific);GO:0046970:NAD-dependent histone deacetylase activity (H4-K16 specific);GO:0046969:NAD-dependent histone deacetylase activity (H3-K9 specific);
ENSDARG00000003022	2584	191	5.11	195	5.42	228	5.5	265	5.7	21	40805336	40835069	-	limk1b	LIM domain kinase 1b [Source:ZFIN%3BAcc:ZDB-GENE-110411-106]	-	-	-
ENSDARG00000003027	1682	81	3.33	78	3.33	80	2.96	110	3.64	16	29685557	29690212	-	scnm1	sodium channel modifier 1 [Source:NCBI gene%3BAcc:321696]	GO:0008380:RNA splicing;GO:0006397:mRNA processing;	GO:0016607:nuclear speck;	GO:0008270:zinc ion binding;
ENSDARG00000003032	2276	3235	98.33	3025	95.47	3392	92.9	3718	90.86	5	24208413	24219344	-	eif4a1b	eukaryotic translation initiation factor 4A1B [Source:ZFIN%3BAcc:ZDB-GENE-040120-6]	GO:0006413:translational initiation;	-	GO:0008026:ATP-dependent helicase activity;GO:0005524:ATP binding;GO:0003743:translation initiation factor activity;
ENSDARG00000003035	4655	5265	78.24	4927	76.02	5933	79.45	6967	83.25	14	12142813	12168897	+	hspa9	heat shock protein 9 [Source:ZFIN%3BAcc:ZDB-GENE-030828-12]	GO:0006457:protein folding;GO:0030097:hemopoiesis;GO:0031101:fin regeneration;	GO:0005759:mitochondrial matrix;	GO:0005524:ATP binding;GO:0016887:ATPase activity;GO:0051082:unfolded protein binding;
ENSDARG00000003041	1239	111	6.2	92	5.33	127	6.39	118	5.3	20	54174978	54192130	-	CABZ01111496.1	E3 ubiquitin-protein ligase pellino homolog 2-like [Source:NCBI gene%3BAcc:100334245]	-	-	-
ENSDARG00000003046	4603	210	3.16	116	1.81	190	2.57	244	2.95	1	17747656	17803614	-	sorbs2a	sorbin and SH3 domain containing 2a [Source:ZFIN%3BAcc:ZDB-GENE-070308-2]	-	-	-
ENSDARG00000003054	3875	4	0.07	13	0.24	10	0.16	13	0.19	1	52518176	52538517	+	tacr3l	tachykinin receptor 3-like [Source:ZFIN%3BAcc:ZDB-GENE-061207-19]	GO:0007268:synaptic transmission;GO:0007217:tachykinin receptor signaling pathway;GO:0007218:neuropeptide signaling pathway;	GO:0005886:plasma membrane;GO:0016021:integral component of membrane;	GO:0004995:tachykinin receptor activity;
ENSDARG00000003058	3083	434	9.74	424	9.88	508	10.27	585	10.55	20	30578163	30610170	+	fgfr1op	FGFR1 oncogene partner [Source:ZFIN%3BAcc:ZDB-GENE-090417-1]	GO:0034453:microtubule anchoring;	GO:0005815:microtubule organizing center;	GO:0005509:calcium ion binding;
ENSDARG00000003061	3814	463	8.4	447	8.42	498	8.14	494	7.2	18	50433722	50524042	-	cd276	CD276 molecule [Source:ZFIN%3BAcc:ZDB-GENE-070112-452]	-	GO:0016021:integral component of membrane;	-
ENSDARG00000003068	5133	1193	16.08	1112	15.56	1322	16.05	1429	15.48	2	23808640	23820280	+	gorasp1a	golgi reassembly stacking protein 1a [Source:ZFIN%3BAcc:ZDB-GENE-030826-23]	-	-	-
ENSDARG00000003069	3905	93	1.65	85	1.56	82	1.31	113	1.61	20	27114874	27190393	-	btbd7	BTB (POZ) domain containing 7 [Source:ZFIN%3BAcc:ZDB-GENE-030131-4477]	-	-	-
ENSDARG00000003077	2695	4	0.1	10	0.27	2	0.05	6	0.12	12	45676667	45688953	+	gpx9	glutathione peroxidase 9 [Source:ZFIN%3BAcc:ZDB-GENE-130603-13]	-	-	-
ENSDARG00000003081	6175	2680	30.02	2847	33.12	3140	31.7	3818	34.39	6	55032439	55082533	+	mybphb	myosin binding protein Hb [Source:ZFIN%3BAcc:ZDB-GENE-030131-9794]	-	-	-
ENSDARG00000003084	4034	14	0.24	11	0.2	17	0.26	27	0.37	25	34887999	34911606	+	spire2	spire-type actin nucleation factor 2 [Source:NCBI gene%3BAcc:492470]	GO:0006810:transport;	GO:0005856:cytoskeleton;GO:0005737:cytoplasm;	GO:0003779:actin binding;
ENSDARG00000003085	3851	113	2.03	98	1.83	124	2.01	107	1.55	12	17117405	17152139	-	stambpl1	STAM binding protein-like 1 [Source:ZFIN%3BAcc:ZDB-GENE-100215-4]	-	-	-
ENSDARG00000003087	2038	344	11.68	281	9.9	303	9.27	370	10.1	22	22260210	22274393	+	ubxn6	UBX domain protein 6 [Source:ZFIN%3BAcc:ZDB-GENE-030131-5680]	-	-	-
ENSDARG00000003090	1209	0	0	0	0	0	0	0	0	15	31438568	31445759	+	or103-4	odorant receptor%2C family C%2C subfamily 103%2C member 4 [Source:ZFIN%3BAcc:ZDB-GENE-000329-12]	GO:0007186:G-protein coupled receptor signaling pathway;GO:0007608:sensory perception of smell;	GO:0005886:plasma membrane;GO:0016021:integral component of membrane;	GO:0004930:G-protein coupled receptor activity;GO:0004984:olfactory receptor activity;
ENSDARG00000003091	2389	632	18.3	585	17.59	695	18.13	690	16.06	5	26212621	26220871	+	oclnb	occludin b [Source:ZFIN%3BAcc:ZDB-GENE-041212-43]	-	GO:0016020:membrane;GO:0005923:bicellular tight junction;GO:0016021:integral component of membrane;	GO:0005198:structural molecule activity;
ENSDARG00000003098	7019	3494	34.44	3462	35.43	4137	36.74	4687	37.14	8	28305213	28342487	-	kdm5bb	lysine (K)-specific demethylase 5Bb [Source:NCBI gene%3BAcc:415256]	GO:0055114:oxidation-reduction process;GO:0034720:histone H3-K4 demethylation;GO:0006355:regulation of transcription, DNA-templated;	GO:0005634:nucleus;	GO:0008270:zinc ion binding;GO:0034647:histone demethylase activity (H3-trimethyl-K4 specific);GO:0016706:oxidoreductase activity, acting on paired donors, with incorporation or reduction of molecular oxygen, 2-oxoglutarate as one donor, and incorporation of one atom each of oxygen into both donors;GO:0016702:oxidoreductase activity, acting on single donors with incorporation of molecular oxygen,…
ENSDARG00000003109	3813	863	15.66	817	15.39	930	15.2	915	13.35	9	35843732	35865528	+	rcan1a	regulator of calcineurin 1a [Source:ZFIN%3BAcc:ZDB-GENE-040801-135]	GO:0019722:calcium-mediated signaling;	-	-
ENSDARG00000003113	2321	20	0.6	19	0.59	24	0.64	16	0.38	23	25946448	25976656	-	ada	adenosine deaminase [Source:NCBI gene%3BAcc:436919]	GO:0046103:inosine biosynthetic process;GO:0009168:purine ribonucleoside monophosphate biosynthetic process;GO:0060169:negative regulation of adenosine receptor signaling pathway;GO:0042110:T cell activation;GO:0043103:hypoxanthine salvage;GO:0006154:adenosine catabolic process;GO:0009117:nucleotide metabolic process;	GO:0060205:cytoplasmic membrane-bounded vesicle lumen;GO:0005829:cytosol;GO:0009897:external side of plasma membrane;GO:0030054:cell junction;	GO:0008270:zinc ion binding;GO:0004000:adenosine deaminase activity;
ENSDARG00000003127	5084	1083	14.74	1115	15.75	1157	14.19	1325	14.5	21	32454896	32467799	-	zgc:123105	Danio rerio zgc:123105 (zgc:123105)%2C transcript variant 2%2C mRNA. [Source:RefSeq mRNA%3BAcc:NM_001365567]	GO:0055114:oxidation-reduction process;	GO:0005737:cytoplasm;	GO:0016491:oxidoreductase activity;
ENSDARG00000003132	873	619	49.05	635	52.25	659	47.05	675	43.01	7	49901483	49908518	+	apip	APAF1 interacting protein [Source:NCBI gene%3BAcc:447941]	GO:0019509:L-methionine biosynthetic process from methylthioadenosine;GO:0006915:apoptotic process;	GO:0005737:cytoplasm;	GO:0046570:methylthioribulose 1-phosphate dehydratase activity;GO:0046872:metal ion binding;
ENSDARG00000003142	3060	140	3.17	118	2.77	118	2.4	155	2.82	1	30585140	30689004	-	dachc	dachshund c [Source:ZFIN%3BAcc:ZDB-GENE-020402-5]	-	-	-
ENSDARG00000003144	1395	22	1.09	21	1.08	35	1.56	25	1	5	20115774	20123002	-	pxmp2	peroxisomal membrane protein 2 [Source:ZFIN%3BAcc:ZDB-GENE-040912-184]	-	GO:0016021:integral component of membrane;	-
ENSDARG00000003146	2216	2	0.06	0	0	2	0.06	1	0.03	13	17702522	17708031	+	si:dkey-27m7.4	si:dkey-27m7.4 [Source:ZFIN%3BAcc:ZDB-GENE-090313-297]	-	-	-
ENSDARG00000003151	1116	2892	179.27	2907	187.1	3259	182.03	3329	165.92	21	45341786	45349548	-	skp1	S-phase kinase-associated protein 1 [Source:ZFIN%3BAcc:ZDB-GENE-040426-1707]	GO:0016310:phosphorylation;GO:0006511:ubiquitin-dependent protein catabolic process;	-	GO:0016301:kinase activity;
ENSDARG00000003153	1201	1533	88.3	1545	92.4	1726	89.58	2170	100.5	18	22721551	22735002	-	nudt21	nudix hydrolase 21 [Source:NCBI gene%3BAcc:394092]	GO:0006378:mRNA polyadenylation;GO:0016567:protein ubiquitination;	GO:0042382:paraspeckles;GO:0005849:mRNA cleavage factor complex;	GO:0003729:mRNA binding;GO:0004842:ubiquitin-protein transferase activity;GO:0017091:AU-rich element binding;GO:0016787:hydrolase activity;
ENSDARG00000003157	3889	153	2.72	125	2.31	138	2.21	169	2.42	10	8034688	8041948	-	nfkbil1	nuclear factor of kappa light polypeptide gene enhancer in B-cells inhibitor-like 1 [Source:ZFIN%3BAcc:ZDB-GENE-040116-7]	-	-	-
ENSDARG00000003165	4077	1671	28.35	1516	26.71	2097	32.06	2219	30.27	11	6115621	6134583	+	nr2f6b	nuclear receptor subfamily 2%2C group F%2C member 6b [Source:ZFIN%3BAcc:ZDB-GENE-040426-2351]	GO:0043401:steroid hormone mediated signaling pathway;GO:0006355:regulation of transcription, DNA-templated;	GO:0005634:nucleus;	GO:0008270:zinc ion binding;GO:0043565:sequence-specific DNA binding;GO:0003707:steroid hormone receptor activity;GO:0004879:ligand-activated sequence-specific DNA binding RNA polymerase II transcription factor activity;
ENSDARG00000003167	4154	463	7.71	398	6.88	477	7.16	540	7.23	12	18542954	18571563	+	mlst8	MTOR associated protein%2C LST8 homolog (S. cerevisiae) [Source:NCBI gene%3BAcc:792689]	-	-	-
ENSDARG00000003169	9164	1410	10.64	1332	10.44	1675	11.39	2063	12.52	11	18873113	19091767	+	magi1b	membrane associated guanylate kinase%2C WW and PDZ domain containing 1b [Source:ZFIN%3BAcc:ZDB-GENE-030131-5110]	-	-	-
ENSDARG00000003175	2622	515	13.59	469	12.85	538	12.79	583	12.37	21	26536950	26554325	+	stx5al	syntaxin 5A%2C like [Source:ZFIN%3BAcc:ZDB-GENE-030131-1825]	-	-	-
ENSDARG00000003181	1362	17	0.86	24	1.27	48	2.2	68	2.78	8	53171002	53179683	-	sult1st4	sulfotransferase family 1%2C cytosolic sulfotransferase 4 [Source:ZFIN%3BAcc:ZDB-GENE-040426-2054]	-	-	GO:0008146:sulfotransferase activity;
ENSDARG00000003189	3555	4345	84.55	4317	87.22	5053	88.6	6334	99.1	22	37631034	37716627	+	psmd1	proteasome 26S subunit%2C non-ATPase 1 [Source:ZFIN%3BAcc:ZDB-GENE-040426-810]	GO:0042176:regulation of protein catabolic process;	GO:0000502:proteasome complex;	GO:0030234:enzyme regulator activity;
ENSDARG00000003193	4406	184	2.89	164	2.67	150	2.12	184	2.32	7	49654588	49692001	+	rassf7b	Ras association domain family member 7b [Source:ZFIN%3BAcc:ZDB-GENE-030429-1]	GO:0007165:signal transduction;	-	-
ENSDARG00000003197	1616	93	3.98	104	4.62	104	4.01	100	3.44	16	3185541	3189799	+	wdr21	WD repeat domain 21 [Source:ZFIN%3BAcc:ZDB-GENE-040109-2]	-	-	-
ENSDARG00000003200	3831	995	17.97	901	16.89	1087	17.69	1344	19.51	4	5807964	5831522	-	foxm1	forkhead box M1 [Source:ZFIN%3BAcc:ZDB-GENE-040426-1275]	GO:0009888:tissue development;GO:0006357:regulation of transcription from RNA polymerase II promoter;GO:0046578:regulation of Ras protein signal transduction;GO:0071156:regulation of cell cycle arrest;GO:0007389:pattern specification process;GO:0032873:negative regulation of stress-activated MAPK cascade;GO:0008284:positive regulation of cell proliferation;GO:0051090:regulation of sequence-specif…	GO:0005667:transcription factor complex;	GO:0019904:protein domain specific binding;GO:0003705:RNA polymerase II distal enhancer sequence-specific DNA binding transcription factor activity;GO:0043565:sequence-specific DNA binding;GO:0003690:double-stranded DNA binding;GO:0008134:transcription factor binding;GO:0008301:DNA binding, bending;
ENSDARG00000003203	2183	0	0	3	0.1	2	0.06	8	0.2	7	14291323	14302716	+	rhcga	Rh family%2C C glycoprotein a [Source:ZFIN%3BAcc:ZDB-GENE-070424-81]	GO:0015696:ammonium transport;	GO:0016021:integral component of membrane;GO:0016020:membrane;	GO:0008519:ammonium transmembrane transporter activity;
ENSDARG00000003205	2844	464	11.29	486	12.27	500	10.96	568	11.11	19	20761108	20777351	-	ngly1	N-glycanase 1 [Source:NCBI gene%3BAcc:553627]	GO:0006516:glycoprotein catabolic process;	GO:0005737:cytoplasm;	GO:0046872:metal ion binding;GO:0000224:peptide-N4-(N-acetyl-beta-glucosaminyl)asparagine amidase activity;
ENSDARG00000003206	1307	73	3.86	90	4.95	120	5.72	130	5.53	23	34047413	34185019	+	chchd6a	coiled-coil-helix-coiled-coil-helix domain containing 6a [Source:NCBI gene%3BAcc:449542]	GO:0042407:cristae formation;GO:0006974:cellular response to DNA damage stimulus;	GO:0005743:mitochondrial inner membrane;	-
ENSDARG00000003207	1471	167	7.85	156	7.62	182	7.71	148	5.6	19	44058557	44065581	-	mterf3	mitochondrial transcription termination factor 3 [Source:ZFIN%3BAcc:ZDB-GENE-040718-359]	-	-	-
ENSDARG00000003208	4584	133	2.01	119	1.86	124	1.69	133	1.61	13	9548849	9558423	+	pomk	protein O-mannose kinase [Source:NCBI gene%3BAcc:492773]	GO:0006468:protein phosphorylation;	GO:0016021:integral component of membrane;	GO:0004672:protein kinase activity;GO:0005524:ATP binding;
ENSDARG00000003210	1649	2	0.08	1	0.04	7	0.26	1	0.03	18	7283283	7304547	+	ano2a	anoctamin 2a [Source:ZFIN%3BAcc:ZDB-GENE-091204-400]	-	-	-
ENSDARG00000003213	3537	3158	61.77	3054	62.02	3574	62.99	4273	67.2	14	46118834	46155077	+	naa15a	N(alpha)-acetyltransferase 15%2C NatA auxiliary subunit a [Source:ZFIN%3BAcc:ZDB-GENE-030131-2392]	-	-	-
ENSDARG00000003216	1723	1629	65.41	1786	74.45	2056	74.38	2606	84.13	25	34013093	34027440	+	anxa2a	annexin A2a [Source:ZFIN%3BAcc:ZDB-GENE-030131-4282]	-	-	GO:0004859:phospholipase inhibitor activity;GO:0008092:cytoskeletal protein binding;GO:0005509:calcium ion binding;GO:0005544:calcium-dependent phospholipid binding;
ENSDARG00000003217	9263	858	6.41	767	5.95	947	6.37	1034	6.21	13	24231327	24263682	-	urb2	URB2 ribosome biogenesis homolog [Source:ZFIN%3BAcc:ZDB-GENE-030131-2621]	-	-	-
ENSDARG00000003219	2119	136	4.44	131	4.44	159	4.68	187	4.91	23	33739215	33753361	-	bin2a	bridging integrator 2a [Source:ZFIN%3BAcc:ZDB-GENE-041114-126]	-	GO:0005737:cytoplasm;	-
ENSDARG00000003229	2099	6	0.2	7	0.24	6	0.18	4	0.11	14	22457230	22464183	+	gdf9	growth differentiation factor 9 [Source:ZFIN%3BAcc:ZDB-GENE-050221-7]	-	GO:0005576:extracellular region;	GO:0008083:growth factor activity;
ENSDARG00000003235	2410	873	25.06	835	24.89	947	24.49	1127	26.01	5	59089699	59111966	-	nup88	nucleoporin 88 [Source:ZFIN%3BAcc:ZDB-GENE-050522-297]	-	-	-
ENSDARG00000003244	3271	212	4.48	210	4.61	242	4.61	258	4.39	2	43894368	43918874	+	gbp3	guanylate binding protein 3 [Source:ZFIN%3BAcc:ZDB-GENE-070912-176]	-	-	-
ENSDARG00000003250	4986	18	0.25	7	0.1	12	0.15	18	0.2	23	29756603	29812667	-	pik3cd	phosphatidylinositol-4%2C5-bisphosphate 3-kinase%2C catalytic subunit delta [Source:ZFIN%3BAcc:ZDB-GENE-040426-1128]	-	-	-
ENSDARG00000003251	2580	148	3.97	132	3.67	103	2.49	146	3.15	19	7001170	7007154	+	zbtb22b	zinc finger and BTB domain containing 22b [Source:ZFIN%3BAcc:ZDB-GENE-010110-4]	-	GO:0005634:nucleus;	GO:0003676:nucleic acid binding;GO:0008270:zinc ion binding;
ENSDARG00000003257	3200	161	3.48	184	4.13	206	4.01	224	3.89	9	17429170	17434157	+	zgc:101559	zgc:101559 [Source:ZFIN%3BAcc:ZDB-GENE-041114-122]	GO:0007264:small GTPase mediated signal transduction;GO:0015031:protein transport;	-	GO:0005525:GTP binding;
ENSDARG00000003259	1930	3	0.11	2	0.07	0	0	2	0.06	10	7738540	7756876	-	loxa	lysyl oxidase a [Source:ZFIN%3BAcc:ZDB-GENE-040426-2398]	GO:0007517:muscle organ development;GO:0022008:neurogenesis;GO:0055114:oxidation-reduction process;GO:0051216:cartilage development;	-	GO:0005507:copper ion binding;GO:0016641:oxidoreductase activity, acting on the CH-NH2 group of donors, oxygen as acceptor;
ENSDARG00000003269	6141	1237	13.94	1240	14.5	1132	11.49	1292	11.7	7	7511914	7643941	+	clcn3	chloride channel 3 [Source:ZFIN%3BAcc:ZDB-GENE-030131-1699]	GO:0055085:transmembrane transport;GO:0006821:chloride transport;	GO:0016021:integral component of membrane;	GO:0005247:voltage-gated chloride channel activity;
ENSDARG00000003270	2267	389	11.87	397	12.58	366	10.06	527	12.93	3	13423935	13437817	-	dhps	deoxyhypusine synthase [Source:ZFIN%3BAcc:ZDB-GENE-040426-2001]	GO:0008612:peptidyl-lysine modification to peptidyl-hypusine;	-	-
ENSDARG00000003281	2094	217	7.17	225	7.72	202	6.01	251	6.67	5	20866572	20879527	-	pik3ip1	phosphoinositide-3-kinase interacting protein 1 [Source:NCBI gene%3BAcc:386643]	GO:0043553:negative regulation of phosphatidylinositol 3-kinase activity;	GO:0016021:integral component of membrane;	-
ENSDARG00000003287	2075	911	30.37	896	31.02	915	27.49	1126	30.18	6	9630523	9646275	-	wdr12	WD repeat domain 12 [Source:NCBI gene%3BAcc:321652]	GO:0008283:cell proliferation;GO:0000463:maturation of LSU-rRNA from tricistronic rRNA transcript (SSU-rRNA, 5.8S rRNA, LSU-rRNA);GO:0000466:maturation of 5.8S rRNA from tricistronic rRNA transcript (SSU-rRNA, 5.8S rRNA, LSU-rRNA);	GO:0005654:nucleoplasm;GO:0070545:PeBoW complex;GO:0030687:preribosome, large subunit precursor;	-
ENSDARG00000003290	2177	20	0.64	24	0.79	27	0.77	34	0.87	2	1522721	1569250	-	dab1b	DAB adaptor protein 1b [Source:ZFIN%3BAcc:ZDB-GENE-060421-7958]	-	-	-
ENSDARG00000003293	1835	500	18.85	420	16.44	446	15.15	557	16.88	12	1947593	1951284	-	sox9a	SRY-box transcription factor 9a [Source:ZFIN%3BAcc:ZDB-GENE-001103-1]	GO:0035118:embryonic pectoral fin morphogenesis;GO:0060536:cartilage morphogenesis;GO:0048709:oligodendrocyte differentiation;GO:0043049:otic placode formation;GO:0048708:astrocyte differentiation;	GO:0005737:cytoplasm;	-
ENSDARG00000003303	990	1	0.07	0	0	0	0	0	0	8	50322769	50346246	-	stc1	stanniocalcin 1 [Source:ZFIN%3BAcc:ZDB-GENE-060825-79]	-	GO:0005576:extracellular region;	GO:0005179:hormone activity;
ENSDARG00000003307	4816	593	8.52	518	7.73	665	8.61	741	8.56	6	49722970	49740750	+	stx16	syntaxin 16 [Source:ZFIN%3BAcc:ZDB-GENE-060810-113]	-	-	-
ENSDARG00000003308	1475	1359	63.74	1294	63.01	1583	66.9	1866	70.37	16	38659475	38729606	+	emc2	ER membrane protein complex subunit 2 [Source:NCBI gene%3BAcc:407073]	-	-	-
ENSDARG00000003311	2570	457	12.3	481	13.44	480	11.64	556	12.03	13	15182200	15226538	+	pank2	pantothenate kinase 2 [Source:ZFIN%3BAcc:ZDB-GENE-070112-1952]	GO:0015937:coenzyme A biosynthetic process;	-	GO:0005524:ATP binding;GO:0004594:pantothenate kinase activity;
ENSDARG00000003313	2665	92	2.39	93	2.51	101	2.36	126	2.63	24	38658309	38694952	+	eps8l1b	eps8 like 1b [Source:ZFIN%3BAcc:ZDB-GENE-050506-143]	-	-	-
ENSDARG00000003320	3940	437	7.67	397	7.24	453	7.17	514	7.26	19	33093395	33137720	+	fam91a1	family with sequence similarity 91 member A1 [Source:NCBI gene%3BAcc:393413]	-	-	-
ENSDARG00000003326	1849	0	0	0	0	0	0	0	0	6	21395051	21455822	+	cacng5a	calcium channel%2C voltage-dependent%2C gamma subunit 5a [Source:ZFIN%3BAcc:ZDB-GENE-120104-4]	-	-	-
ENSDARG00000003328	5531	244	3.05	242	3.14	348	3.92	347	3.49	13	9612395	9657951	+	slf2	SMC5-SMC6 complex localization factor 2 [Source:ZFIN%3BAcc:ZDB-GENE-081107-61]	-	-	-
ENSDARG00000003344	3555	1	0.02	3	0.06	3	0.05	0	0	21	30746348	30765533	+	trpc2b	transient receptor potential cation channel subfamily C member 2b [Source:ZFIN%3BAcc:ZDB-GENE-050712-3]	GO:0070588:calcium ion transmembrane transport;	GO:0016021:integral component of membrane;	GO:0005262:calcium channel activity;
ENSDARG00000003373	914	169	12.79	184	14.46	241	16.44	255	15.52	22	38037530	38045244	+	commd2	COMM domain containing 2 [Source:ZFIN%3BAcc:ZDB-GENE-040718-118]	-	-	-
ENSDARG00000003375	2061	202	6.78	228	7.95	234	7.08	223	6.02	2	10287133	10338813	-	gng12a	guanine nucleotide binding protein (G protein)%2C gamma 12a [Source:ZFIN%3BAcc:ZDB-GENE-040426-2555]	GO:0007186:G-protein coupled receptor signaling pathway;	GO:0005834:heterotrimeric G-protein complex;	GO:0004871:signal transducer activity;
ENSDARG00000003380	3456	0	0	0	0	0	0	1	0.02	13	30655172	30662403	-	si:dkey-275b16.2	si:dkey-275b16.2 [Source:ZFIN%3BAcc:ZDB-GENE-090312-204]	GO:0055114:oxidation-reduction process;	-	GO:0016491:oxidoreductase activity;
ENSDARG00000003381	3137	43	0.95	26	0.6	25	0.5	49	0.87	17	15388479	15410985	+	si:ch211-266g18.6	si:ch211-266g18.6 [Source:ZFIN%3BAcc:ZDB-GENE-131121-599]	-	-	-
ENSDARG00000003382	1937	583	20.82	534	19.8	663	21.34	853	24.49	2	5709424	5723786	-	cwc25	CWC25 spliceosome associated protein homolog [Source:ZFIN%3BAcc:ZDB-GENE-040426-2817]	-	-	-
ENSDARG00000003383	4936	131	1.84	151	2.2	163	2.06	150	1.69	23	27495091	27506161	-	asb8	ankyrin repeat and SOCS box containing 8 [Source:ZFIN%3BAcc:ZDB-GENE-030131-5411]	GO:0035556:intracellular signal transduction;	-	-
ENSDARG00000003395	9726	386	2.75	314	2.32	391	2.51	529	3.03	15	36054864	36112794	+	col4a3	collagen%2C type IV%2C alpha 3 [Source:ZFIN%3BAcc:ZDB-GENE-070802-4]	-	GO:0005581:collagen trimer;	GO:0005201:extracellular matrix structural constituent;
ENSDARG00000003398	5139	1059	14.26	994	13.89	1115	13.52	1249	13.52	1	14454663	14464020	+	rbpja	recombination signal binding protein for immunoglobulin kappa J region a [Source:ZFIN%3BAcc:ZDB-GENE-031117-1]	-	-	-
ENSDARG00000003399	2238	240	7.42	200	6.42	326	9.08	388	9.64	13	28495419	28501985	+	fgf8a	fibroblast growth factor 8a [Source:NCBI gene%3BAcc:30538]	GO:0009880:embryonic pattern specification;GO:0048709:oligodendrocyte differentiation;GO:0030917:midbrain-hindbrain boundary development;GO:0030901:midbrain development;GO:0060271:cilium morphogenesis;GO:0042664:negative regulation of endodermal cell fate specification;GO:0030878:thyroid gland development;GO:0001756:somitogenesis;GO:0043049:otic placode formation;GO:0051216:cartilage development;…	GO:0005615:extracellular space;GO:0005764:lysosome;	GO:0008083:growth factor activity;
ENSDARG00000003403	9037	22	0.17	28	0.22	28	0.19	22	0.14	5	21295747	21524251	-	tenm1	teneurin transmembrane protein 1 [Source:ZFIN%3BAcc:ZDB-GENE-060531-26]	-	-	-
ENSDARG00000003411	1772	289	11.28	236	9.57	236	8.3	316	9.92	17	42565998	42568498	-	foxa2	forkhead box A2 [Source:NCBI gene%3BAcc:30126]	GO:0007492:endoderm development;GO:0045665:negative regulation of neuron differentiation;GO:0006357:regulation of transcription from RNA polymerase II promoter;GO:0033504:floor plate development;GO:0021533:cell differentiation in hindbrain;GO:0060487:lung epithelial cell differentiation;GO:0007418:ventral midline development;GO:0031018:endocrine pancreas development;GO:0060441:epithelial tube bra…	GO:0005667:transcription factor complex;	GO:0019904:protein domain specific binding;GO:0003705:RNA polymerase II distal enhancer sequence-specific DNA binding transcription factor activity;GO:0043565:sequence-specific DNA binding;GO:0003690:double-stranded DNA binding;GO:0008134:transcription factor binding;GO:0008301:DNA binding, bending;
ENSDARG00000003414	1112	33	2.05	33	2.13	26	1.46	40	2	21	22423286	22428328	+	capslb	calcyphosine-like b [Source:ZFIN%3BAcc:ZDB-GENE-050417-298]	-	-	GO:0005509:calcium ion binding;
ENSDARG00000003420	1752	55	2.17	66	2.71	63	2.24	61	1.94	18	40486457	40509006	-	chrna5	cholinergic receptor%2C nicotinic%2C alpha 5 [Source:ZFIN%3BAcc:ZDB-GENE-050417-440]	GO:0006811:ion transport;	GO:0045211:postsynaptic membrane;GO:0030054:cell junction;GO:0005886:plasma membrane;GO:0016021:integral component of membrane;	GO:0004889:acetylcholine-activated cation-selective channel activity;
ENSDARG00000003421	3221	117	2.51	84	1.87	106	2.05	166	2.87	9	12468500	12575776	-	igf2bp2a	insulin-like growth factor 2 mRNA binding protein 2a [Source:ZFIN%3BAcc:ZDB-GENE-070912-44]	-	-	GO:0000166:nucleotide binding;GO:0003723:RNA binding;
ENSDARG00000003429	1836	3638	137.08	3372	131.92	4315	146.5	4802	145.48	10	5017216	5024520	-	hnrnpdl	heterogeneous nuclear ribonucleoprotein D-like [Source:ZFIN%3BAcc:ZDB-GENE-040426-2717]	-	-	-
ENSDARG00000003444	1299	160	8.52	133	7.35	168	8.06	145	6.21	13	31536709	31544365	-	dhrs7	dehydrogenase/reductase (SDR family) member 7 [Source:ZFIN%3BAcc:ZDB-GENE-060825-21]	GO:0008152:metabolic process;	-	GO:0016491:oxidoreductase activity;GO:0000166:nucleotide binding;
ENSDARG00000003446	2412	336	9.64	296	8.81	311	8.04	414	9.55	22	10516332	10539180	-	ippk	inositol 1%2C3%2C4%2C5%2C6-pentakisphosphate 2-kinase [Source:NCBI gene%3BAcc:541511]	GO:0032402:melanosome transport;GO:0016310:phosphorylation;GO:0007368:determination of left/right symmetry;	GO:0005813:centrosome;GO:0005737:cytoplasm;GO:0005634:nucleus;	GO:0035299:inositol pentakisphosphate 2-kinase activity;GO:0005524:ATP binding;
ENSDARG00000003449	3135	71	1.57	43	0.99	86	1.71	78	1.38	13	4505079	4620715	+	pde10a	phosphodiesterase 10A [Source:ZFIN%3BAcc:ZDB-GENE-040426-1115]	GO:0007165:signal transduction;	-	GO:0046872:metal ion binding;GO:0004114:3',5'-cyclic-nucleotide phosphodiesterase activity;
ENSDARG00000003462	1431	131	6.33	97	4.87	96	4.18	150	5.83	21	1647990	1670264	+	fech	ferrochelatase [Source:ZFIN%3BAcc:ZDB-GENE-000928-1]	GO:0043249:erythrocyte maturation;GO:0006783:heme biosynthetic process;	-	GO:0004325:ferrochelatase activity;
ENSDARG00000003469	1967	734	25.81	784	28.63	842	26.68	1056	29.86	23	28343988	28347039	-	neurod4	neuronal differentiation 4 [Source:ZFIN%3BAcc:ZDB-GENE-030730-1]	GO:0006355:regulation of transcription, DNA-templated;GO:0050769:positive regulation of neurogenesis;GO:0001839:neural plate morphogenesis;	GO:0005634:nucleus;	GO:0003677:DNA binding;GO:0046983:protein dimerization activity;
ENSDARG00000003475	1628	0	0	2	0.09	0	0	1	0.03	23	24489077	24493811	-	sult1st5	sulfotransferase family 1%2C cytosolic sulfotransferase 5 [Source:ZFIN%3BAcc:ZDB-GENE-050809-2]	GO:0006805:xenobiotic metabolic process;	-	GO:0008146:sulfotransferase activity;
ENSDARG00000003486	4544	3195	48.64	3123	49.37	3747	51.4	4272	52.29	3	30888126	30909487	-	ppp1caa	protein phosphatase 1%2C catalytic subunit%2C alpha isozyme a [Source:ZFIN%3BAcc:ZDB-GENE-040516-3]	-	-	-
ENSDARG00000003487	6116	2529	28.61	2502	29.38	2834	28.88	3315	30.15	18	17537311	17580522	+	nup93	nucleoporin 93 [Source:NCBI gene%3BAcc:30172]	GO:0051292:nuclear pore complex assembly;GO:0051028:mRNA transport;GO:0015031:protein transport;	GO:0005643:nuclear pore;GO:0031965:nuclear membrane;GO:0034399:nuclear periphery;	GO:0017056:structural constituent of nuclear pore;
ENSDARG00000003495	7797	680	6.03	644	5.93	847	6.77	941	6.71	7	34317401	34413398	-	madd	MAP-kinase activating death domain [Source:ZFIN%3BAcc:ZDB-GENE-030131-8076]	-	-	-
ENSDARG00000003512	6628	333	3.48	281	3.05	350	3.29	394	3.31	4	17886838	18202291	-	anks1b	ankyrin repeat and sterile alpha motif domain containing 1B [Source:NCBI gene%3BAcc:565408]	-	GO:0005737:cytoplasm;	-
ENSDARG00000003517	1314	153	8.06	131	7.16	139	6.59	153	6.48	2	26682913	26688908	+	impa1	inositol monophosphatase 1 [Source:ZFIN%3BAcc:ZDB-GENE-040718-245]	-	-	-
ENSDARG00000003519	2742	183	4.62	172	4.51	173	3.93	132	2.68	7	55530532	55539805	-	aprt	adenine phosphoribosyltransferase [Source:ZFIN%3BAcc:ZDB-GENE-040426-1492]	GO:0009116:nucleoside metabolic process;GO:0006168:adenine salvage;	GO:0005737:cytoplasm;	GO:0003999:adenine phosphoribosyltransferase activity;
ENSDARG00000003520	7070	102	1	93	0.94	147	1.3	177	1.39	7	39679944	39705763	+	tbc1d14	TBC1 domain family%2C member 14 [Source:ZFIN%3BAcc:ZDB-GENE-030131-6136]	-	GO:0005622:intracellular;	-
ENSDARG00000003523	1356	0	0	1	0.05	0	0	1	0.04	14	16345003	16352209	+	itln3	intelectin 3 [Source:ZFIN%3BAcc:ZDB-GENE-090527-4]	-	-	-
ENSDARG00000003526	1444	2832	135.68	2813	139.92	3299	142.41	3186	122.72	11	36342997	36350993	-	psma5	proteasome 20S subunit alpha 5 [Source:ZFIN%3BAcc:ZDB-GENE-040625-96]	GO:0006511:ubiquitin-dependent protein catabolic process;	GO:0005737:cytoplasm;GO:0019773:proteasome core complex, alpha-subunit complex;GO:0005634:nucleus;	GO:0004298:threonine-type endopeptidase activity;
ENSDARG00000003527	2166	1137	36.31	1105	36.64	1226	35.28	1451	37.26	8	45394914	45416187	-	mak16	MAK16 homolog (S. cerevisiae) [Source:NCBI gene%3BAcc:192312]	GO:0007275:multicellular organismal development;	GO:0005634:nucleus;GO:0005730:nucleolus;	-
ENSDARG00000003531	3381	1690	34.58	1677	35.63	1955	36.04	2190	36.03	2	30739680	30748070	+	tcea1	transcription elongation factor A (SII)%2C 1 [Source:ZFIN%3BAcc:ZDB-GENE-030131-8049]	GO:0006357:regulation of transcription from RNA polymerase II promoter;GO:0006414:translational elongation;GO:0032784:regulation of DNA-templated transcription, elongation;	GO:0005634:nucleus;	GO:0003746:translation elongation factor activity;GO:0008270:zinc ion binding;GO:0003677:DNA binding;
ENSDARG00000003533	3998	3	0.05	6	0.11	2	0.03	8	0.11	22	28647130	28668442	-	col8a1b	collagen%2C type VIII%2C alpha 1b [Source:ZFIN%3BAcc:ZDB-GENE-060503-140]	-	-	-
ENSDARG00000003544	2877	139	3.34	119	2.97	132	2.86	236	4.56	9	45227028	45541367	+	adarb1b	adenosine deaminase RNA specific B1b [Source:ZFIN%3BAcc:ZDB-GENE-030219-15]	-	-	-
ENSDARG00000003553	1614	2	0.09	1	0.04	5	0.19	1	0.03	7	52364748	52369218	+	gnrhr2	gonadotropin releasing hormone receptor 2 [Source:ZFIN%3BAcc:ZDB-GENE-090128-3]	GO:0097211:cellular response to gonadotropin-releasing hormone;GO:0007186:G-protein coupled receptor signaling pathway;	GO:0016021:integral component of membrane;	GO:0004968:gonadotropin-releasing hormone receptor activity;
ENSDARG00000003564	1208	715	40.95	685	40.73	795	41.02	744	34.26	8	20852995	20858676	-	dohh	deoxyhypusine hydroxylase/monooxygenase [Source:NCBI gene%3BAcc:321732]	GO:0008612:peptidyl-lysine modification to peptidyl-hypusine;GO:0055114:oxidation-reduction process;	-	GO:0046872:metal ion binding;GO:0019135:deoxyhypusine monooxygenase activity;
ENSDARG00000003570	2764	2570	64.32	2370	61.59	2553	57.58	3054	61.46	4	9836465	9843836	+	hsp90b1	heat shock protein 90%2C beta (grp94)%2C member 1 [Source:ZFIN%3BAcc:ZDB-GENE-031002-1]	-	-	-
ENSDARG00000003573	1028	321	21.6	321	22.43	378	22.92	396	21.43	3	35550870	35554809	-	dctn5	dynactin 5 [Source:ZFIN%3BAcc:ZDB-GENE-040718-201]	-	-	-
ENSDARG00000003576	3295	509	10.69	485	10.57	474	8.97	549	9.27	16	32238020	32276030	+	klhl32	kelch-like family member 32 [Source:ZFIN%3BAcc:ZDB-GENE-070209-47]	-	-	-
ENSDARG00000003584	2740	226	5.71	211	5.53	234	5.32	249	5.05	20	35461736	35471079	-	pla2g7	phospholipase A2%2C group VII (platelet-activating factor acetylhydrolase%2C plasma) [Source:ZFIN%3BAcc:ZDB-GENE-040426-2248]	-	-	-
ENSDARG00000003592	1293	175	9.36	191	10.61	217	10.46	215	9.25	5	33281105	33283718	+	surf1	SURF1 cytochrome c oxidase assembly factor [Source:ZFIN%3BAcc:ZDB-GENE-041108-2]	GO:0048568:embryonic organ development;GO:0021522:spinal cord motor neuron differentiation;	GO:0016020:membrane;	GO:0004129:cytochrome-c oxidase activity;
ENSDARG00000003599	1698	46995	1914.66	46046	1947.81	49609	1821.15	49842	1632.7	3	29867213	29871364	-	rpl3	ribosomal protein L3 [Source:ZFIN%3BAcc:ZDB-GENE-030131-1291]	GO:0031017:exocrine pancreas development;GO:0006412:translation;	GO:0005840:ribosome;	GO:0003735:structural constituent of ribosome;
ENSDARG00000003607	3106	1334	29.71	1424	32.93	1525	30.6	1669	29.89	2	24374305	24386382	+	nr2f6a	nuclear receptor subfamily 2%2C group F%2C member 6a [Source:ZFIN%3BAcc:ZDB-GENE-030131-4362]	GO:0043401:steroid hormone mediated signaling pathway;GO:0006355:regulation of transcription, DNA-templated;	GO:0005634:nucleus;	GO:0008270:zinc ion binding;GO:0043565:sequence-specific DNA binding;GO:0003707:steroid hormone receptor activity;GO:0004879:ligand-activated sequence-specific DNA binding RNA polymerase II transcription factor activity;
ENSDARG00000003615	2687	0	0	0	0	0	0	0	0	4	18804317	18823032	+	slc26a3.2	solute carrier family 26 member 3%2C tandem duplicate 2 [Source:ZFIN%3BAcc:ZDB-GENE-041210-179]	GO:0008272:sulfate transport;GO:0055085:transmembrane transport;	GO:0016021:integral component of membrane;	GO:0008271:secondary active sulfate transmembrane transporter activity;
ENSDARG00000003616	2456	542	15.27	474	13.86	549	13.93	653	14.79	18	18879733	18901017	+	arih1	ariadne ubiquitin-conjugating enzyme E2 binding protein homolog 1 (Drosophila) [Source:NCBI gene%3BAcc:327005]	-	-	-
ENSDARG00000003631	3682	326	6.13	242	4.72	333	5.64	448	6.77	1	19433004	19466453	+	clockb	clock circadian regulator b [Source:ZFIN%3BAcc:ZDB-GENE-030408-2]	GO:0009648:photoperiodism;GO:0006355:regulation of transcription, DNA-templated;GO:0007623:circadian rhythm;GO:0007165:signal transduction;	GO:0005667:transcription factor complex;GO:0005737:cytoplasm;	GO:0004871:signal transducer activity;GO:0003677:DNA binding;GO:0046983:protein dimerization activity;GO:0003700:sequence-specific DNA binding transcription factor activity;GO:0005515:protein binding;
ENSDARG00000003632	1435	2	0.1	0	0	1	0.04	0	0	11	36243774	36249902	+	zgc:172270	zgc:172270 [Source:ZFIN%3BAcc:ZDB-GENE-080204-67]	-	GO:0000139:Golgi membrane;GO:0005901:caveola;	-
ENSDARG00000003635	1434	174	8.39	157	7.86	220	9.56	257	9.97	5	38596630	38604470	+	mogat3b	monoacylglycerol O-acyltransferase 3b [Source:ZFIN%3BAcc:ZDB-GENE-110302-2]	-	-	-
ENSDARG00000003641	1872	1491	55.1	1348	51.72	1651	54.97	1800	53.48	9	30112423	30128760	+	tfg	trafficking from ER to golgi regulator [Source:ZFIN%3BAcc:ZDB-GENE-030131-8410]	-	-	-
ENSDARG00000003642	1293	82	4.39	94	5.22	95	4.58	109	4.69	17	2108984	2126517	-	zfyve19	zinc finger%2C FYVE domain containing 19 [Source:ZFIN%3BAcc:ZDB-GENE-040718-109]	-	-	GO:0046872:metal ion binding;
ENSDARG00000003655	2947	149	3.5	181	4.41	242	5.12	229	4.32	22	21128113	21150845	-	tmem59l	transmembrane protein 59-like [Source:ZFIN%3BAcc:ZDB-GENE-040426-2651]	-	-	-
ENSDARG00000003675	3085	243	5.45	231	5.38	272	5.5	297	5.35	9	21383620	21401302	+	cryl1	crystallin%2C lambda 1 [Source:ZFIN%3BAcc:ZDB-GENE-060810-7]	GO:0006631:fatty acid metabolic process;GO:0055114:oxidation-reduction process;	-	GO:0003857:3-hydroxyacyl-CoA dehydrogenase activity;GO:0070403:NAD+ binding;
ENSDARG00000003680	6062	394	4.5	388	4.6	462	4.75	534	4.9	19	33553586	33785914	+	runx1t1	RUNX1 partner transcriptional co-repressor 1 [Source:ZFIN%3BAcc:ZDB-GENE-060929-164]	GO:0006355:regulation of transcription, DNA-templated;	-	GO:0003700:sequence-specific DNA binding transcription factor activity;GO:0008270:zinc ion binding;
ENSDARG00000003681	5380	5904	75.92	6042	80.67	6805	78.84	7817	80.82	20	18702624	18715649	+	eif5	eukaryotic translation initiation factor 5 [Source:ZFIN%3BAcc:ZDB-GENE-030131-975]	GO:0006413:translational initiation;GO:0016070:RNA metabolic process;	-	GO:0003743:translation initiation factor activity;
ENSDARG00000003684	6339	1119	12.21	1106	12.53	1352	13.29	1789	15.7	6	21157195	21189295	-	obsl1a	obscurin like cytoskeletal adaptor 1a [Source:ZFIN%3BAcc:ZDB-GENE-060503-649]	-	-	-
ENSDARG00000003693	2126	2363	76.89	2134	72.1	2626	76.99	3066	80.22	14	7377552	7395997	+	hars	histidyl-tRNA synthetase [Source:ZFIN%3BAcc:ZDB-GENE-040912-152]	-	-	-
ENSDARG00000003695	1823	4464	169.4	4185	164.89	4589	156.91	5144	156.95	8	2412583	2434287	-	vdac3	voltage-dependent anion channel 3 [Source:ZFIN%3BAcc:ZDB-GENE-040426-2380]	-	-	-
ENSDARG00000003697	2367	26	0.76	17	0.52	50	1.32	41	0.96	6	49063289	49078702	-	slc5a8l	solute carrier family 5 member 8%2C like [Source:NCBI gene%3BAcc:556156]	GO:0006814:sodium ion transport;GO:0055085:transmembrane transport;	GO:0016021:integral component of membrane;	GO:0015355:secondary active monocarboxylate transmembrane transporter activity;GO:0015293:symporter activity;
ENSDARG00000003699	9286	451	3.36	365	2.82	458	3.07	562	3.37	14	22397251	22443502	+	atp7a	ATPase copper transporting alpha [Source:ZFIN%3BAcc:ZDB-GENE-060825-45]	GO:0006825:copper ion transport;GO:0046688:response to copper ion;	GO:0016021:integral component of membrane;	GO:0005507:copper ion binding;GO:0005524:ATP binding;GO:0019829:cation-transporting ATPase activity;
ENSDARG00000003701	1113	38	2.36	21	1.36	26	1.46	16	0.8	1	33645044	33647169	-	cldng	claudin g [Source:NCBI gene%3BAcc:81586]	GO:0016338:calcium-independent cell-cell adhesion via plasma membrane cell-adhesion molecules;	GO:0016021:integral component of membrane;GO:0005923:bicellular tight junction;GO:0005886:plasma membrane;	GO:0005198:structural molecule activity;GO:0042802:identical protein binding;
ENSDARG00000003705	3813	279	5.06	301	5.67	338	5.53	351	5.12	25	3677650	3685280	+	prnprs3	prion protein%2C related sequence 3 [Source:ZFIN%3BAcc:ZDB-GENE-041221-3]	GO:0007156:homophilic cell adhesion via plasma membrane adhesion molecules;GO:0042981:regulation of apoptotic process;GO:0048854:brain morphogenesis;GO:0021731:trigeminal motor nucleus development;	GO:0005886:plasma membrane;	-
ENSDARG00000003706	20050	129	0.45	104	0.37	77	0.24	100	0.28	17	20009132	20118244	-	ryr2b	ryanodine receptor 2b (cardiac) [Source:ZFIN%3BAcc:ZDB-GENE-061226-3]	GO:0070588:calcium ion transmembrane transport;GO:0006874:cellular calcium ion homeostasis;	GO:0016021:integral component of membrane;GO:0005783:endoplasmic reticulum;	GO:0005509:calcium ion binding;GO:0005220:inositol 1,4,5-trisphosphate-sensitive calcium-release channel activity;GO:0005219:ryanodine-sensitive calcium-release channel activity;
ENSDARG00000003732	2282	105	3.18	125	3.93	155	4.23	165	4.02	6	43390387	43433277	+	mitfa	melanocyte inducing transcription factor a [Source:ZFIN%3BAcc:ZDB-GENE-990910-11]	GO:0030318:melanocyte differentiation;GO:0006355:regulation of transcription, DNA-templated;	GO:0005654:nucleoplasm;	GO:0001071:nucleic acid binding transcription factor activity;GO:0046983:protein dimerization activity;
ENSDARG00000003749	1710	777	31.43	829	34.82	968	35.29	1037	33.73	8	2456854	2469761	+	polb	polymerase (DNA directed)%2C beta [Source:NCBI gene%3BAcc:554204]	GO:0006284:base-excision repair;GO:0006260:DNA replication;	GO:0005737:cytoplasm;GO:0005634:nucleus;	GO:0003887:DNA-directed DNA polymerase activity;GO:0046872:metal ion binding;GO:0003677:DNA binding;GO:0016829:lyase activity;
ENSDARG00000003750	5174	4669	62.43	4120	57.2	5337	64.3	5955	64.02	20	25445826	25473275	+	pfas	phosphoribosylformylglycinamidine synthase [Source:ZFIN%3BAcc:ZDB-GENE-030131-4420]	GO:0006189:'de novo' IMP biosynthetic process;	-	GO:0004642:phosphoribosylformylglycinamidine synthase activity;
ENSDARG00000003751	7634	296	2.68	332	3.12	312	2.55	392	2.86	20	1240461	1268869	-	lats1	large tumor suppressor kinase 1 [Source:ZFIN%3BAcc:ZDB-GENE-050523-2]	GO:0060027:convergent extension involved in gastrulation;GO:0006468:protein phosphorylation;	-	GO:0005524:ATP binding;GO:0004674:protein serine/threonine kinase activity;
ENSDARG00000003754	3506	149	2.94	147	3.01	172	3.06	194	3.08	6	49107048	49159207	-	tspan2a	tetraspanin 2a [Source:ZFIN%3BAcc:ZDB-GENE-050522-511]	-	GO:0016021:integral component of membrane;	-
ENSDARG00000003757	1861	363	13.49	309	11.93	342	11.46	357	10.67	2	29985664	29996036	-	cnpy1	canopy FGF signaling regulator 1 [Source:NCBI gene%3BAcc:402819]	GO:0007368:determination of left/right symmetry;GO:0030917:midbrain-hindbrain boundary development;GO:0040036:regulation of fibroblast growth factor receptor signaling pathway;GO:0070121:Kupffer's vesicle development;	GO:0005783:endoplasmic reticulum;	-
ENSDARG00000003769	3503	204	4.03	202	4.14	265	4.72	235	3.73	7	39738505	39743452	+	tada2b	transcriptional adaptor 2B [Source:NCBI gene%3BAcc:554156]	GO:0006355:regulation of transcription, DNA-templated;	GO:0005634:nucleus;	GO:0003677:DNA binding;GO:0003682:chromatin binding;GO:0008270:zinc ion binding;
ENSDARG00000003776	5883	530	6.23	505	6.17	554	5.87	753	7.12	24	17068724	17127833	+	pip4k2aa	phosphatidylinositol-5-phosphate 4-kinase%2C type II%2C alpha a [Source:ZFIN%3BAcc:ZDB-GENE-080721-18]	GO:0006796:phosphate-containing compound metabolic process;	-	GO:0016301:kinase activity;
ENSDARG00000003779	6215	1190	13.25	1207	13.95	1294	12.98	1624	14.53	2	30554256	30693742	-	ctnnd2b	catenin (cadherin-associated protein)%2C delta 2b [Source:ZFIN%3BAcc:ZDB-GENE-070912-532]	-	-	-
ENSDARG00000003789	5612	1450	17.87	1291	16.52	1529	16.98	1883	18.66	4	16649542	16706978	-	dennd5b	DENN/MADD domain containing 5B [Source:NCBI gene%3BAcc:323528]	-	GO:0016021:integral component of membrane;	GO:0017112:Rab guanyl-nucleotide exchange factor activity;
ENSDARG00000003795	975	3381	239.89	3358	247.38	3954	252.79	4151	236.81	18	26096814	26101800	-	idh2	isocitrate dehydrogenase (NADP(+)) 2 [Source:ZFIN%3BAcc:ZDB-GENE-031118-95]	GO:0006099:tricarboxylic acid cycle;GO:0006102:isocitrate metabolic process;	-	GO:0051287:NAD binding;GO:0004450:isocitrate dehydrogenase (NADP+) activity;GO:0000287:magnesium ion binding;
ENSDARG00000003797	5451	7	0.09	4	0.05	16	0.18	17	0.17	20	27295701	27311675	-	asb2a.1	ankyrin repeat and SOCS box containing 2a%2C tandem duplicate 1 [Source:ZFIN%3BAcc:ZDB-GENE-030131-5355]	-	-	-
ENSDARG00000003803	1331	15	0.78	15	0.81	11	0.52	15	0.63	5	71802014	71819807	+	LHX3	LIM homeobox 3 [Source:HGNC Symbol%3BAcc:HGNC:6595]	GO:0006355:regulation of transcription, DNA-templated;	GO:0005634:nucleus;	GO:0003700:sequence-specific DNA binding transcription factor activity;GO:0043565:sequence-specific DNA binding;GO:0008270:zinc ion binding;
ENSDARG00000003808	1806	355	13.6	242	9.62	240	8.28	314	9.67	5	43006422	43011814	+	aqp3a	aquaporin 3a [Source:ZFIN%3BAcc:ZDB-GENE-040426-2826]	GO:0006810:transport;	GO:0016021:integral component of membrane;	GO:0005372:water transmembrane transporter activity;GO:0015204:urea transmembrane transporter activity;GO:0015168:glycerol transmembrane transporter activity;GO:0015105:arsenite transmembrane transporter activity;
ENSDARG00000003811	7524	1348	12.39	1343	12.82	1571	13.02	1791	13.24	4	14449233	14531687	-	plxnb2a	plexin b2a [Source:ZFIN%3BAcc:ZDB-GENE-030131-8917]	GO:0007165:signal transduction;GO:0002040:sprouting angiogenesis;	GO:0005622:intracellular;GO:0016021:integral component of membrane;	GO:0004872:receptor activity;
ENSDARG00000003818	3405	520	10.56	479	10.1	522	9.56	595	9.72	6	2206495	2222707	-	prkag1	protein kinase%2C AMP-activated%2C gamma 1 non-catalytic subunit [Source:ZFIN%3BAcc:ZDB-GENE-040426-2188]	-	-	-
ENSDARG00000003820	4079	45	0.76	37	0.65	39	0.6	50	0.68	16	50089417	50111057	+	nr1d2a	nuclear receptor subfamily 1%2C group D%2C member 2a [Source:ZFIN%3BAcc:ZDB-GENE-040504-1]	GO:0043401:steroid hormone mediated signaling pathway;GO:0006355:regulation of transcription, DNA-templated;	GO:0005634:nucleus;	GO:0008270:zinc ion binding;GO:0004887:thyroid hormone receptor activity;GO:0043565:sequence-specific DNA binding;GO:0003707:steroid hormone receptor activity;
ENSDARG00000003822	1589	112	4.88	102	4.61	110	4.32	98	3.43	4	11458078	11462702	+	ankrd16	ankyrin repeat domain 16 [Source:ZFIN%3BAcc:ZDB-GENE-041210-253]	-	-	-
ENSDARG00000003827	2163	293	9.37	264	8.77	288	8.3	342	8.79	13	37586491	37600600	-	snapc1b	small nuclear RNA activating complex%2C polypeptide 1b [Source:ZFIN%3BAcc:ZDB-GENE-040426-716]	-	-	-
ENSDARG00000003829	4104	901	15.19	751	13.14	819	12.44	983	13.32	13	24068577	24218795	-	galnt2	UDP-N-acetyl-alpha-D-galactosamine:polypeptide N-acetylgalactosaminyltransferase 2 [Source:ZFIN%3BAcc:ZDB-GENE-041111-110]	-	GO:0016021:integral component of membrane;GO:0005794:Golgi apparatus;	GO:0016757:transferase activity, transferring glycosyl groups;
ENSDARG00000003835	4732	1740	25.44	1772	26.9	2023	26.65	2038	23.96	21	17541634	17570251	+	stom	stomatin [Source:ZFIN%3BAcc:ZDB-GENE-980526-486]	-	GO:0016020:membrane;	-
ENSDARG00000003841	1953	72	2.55	46	1.69	52	1.66	72	2.05	25	13677299	13686751	+	usb1	U6 snRNA biogenesis 1 [Source:NCBI gene%3BAcc:445066]	GO:0008380:RNA splicing;GO:0006397:mRNA processing;	GO:0005634:nucleus;	GO:0004518:nuclease activity;
ENSDARG00000003845	2559	266	7.19	255	7.16	300	7.31	306	6.65	21	34686764	34793909	+	chm	CHM Rab escort protein [Source:ZFIN%3BAcc:ZDB-GENE-030318-2]	GO:0060042:retina morphogenesis in camera-type eye;GO:0050910:detection of mechanical stimulus involved in sensory perception of sound;GO:0048798:swim bladder inflation;GO:0042491:auditory receptor cell differentiation;GO:0050935:iridophore differentiation;GO:0006886:intracellular protein transport;	GO:0005968:Rab-protein geranylgeranyltransferase complex;	GO:0004663:Rab geranylgeranyltransferase activity;
ENSDARG00000003846	789	445	39.02	475	43.24	518	40.92	572	40.32	7	72577898	72585111	+	mrpl21	mitochondrial ribosomal protein L21 [Source:ZFIN%3BAcc:ZDB-GENE-061027-183]	GO:0006412:translation;	GO:0005840:ribosome;	GO:0003735:structural constituent of ribosome;GO:0003723:RNA binding;
ENSDARG00000003854	7443	3062	28.46	2936	28.33	3763	31.51	4253	31.78	14	937194	970853	-	acsl1b	acyl-CoA synthetase long chain family member 1b [Source:ZFIN%3BAcc:ZDB-GENE-040801-88]	-	-	-
ENSDARG00000003860	2793	4957	122.78	5117	131.59	6060	135.25	6716	133.75	19	18131512	18136410	-	cbx3a	chromobox homolog 3a (HP1 gamma homolog%2C Drosophila) [Source:ZFIN%3BAcc:ZDB-GENE-030131-1158]	-	GO:0005634:nucleus;	-
ENSDARG00000003865	1146	62	3.74	62	3.89	63	3.43	96	4.66	23	19066696	19103855	-	pard6b	par-6 partitioning defective 6 homolog beta (C. elegans) [Source:ZFIN%3BAcc:ZDB-GENE-090312-133]	-	GO:0016324:apical plasma membrane;	-
ENSDARG00000003866	3232	2119	45.36	2092	46.49	2431	46.89	2557	44.01	1	29798140	29824375	+	tm9sf2	transmembrane 9 superfamily member 2 [Source:ZFIN%3BAcc:ZDB-GENE-030131-6302]	-	GO:0016021:integral component of membrane;	-
ENSDARG00000003867	1573	58	2.55	41	1.87	60	2.38	76	2.69	8	7494941	7504201	-	cdk20	cyclin-dependent kinase 20 [Source:NCBI gene%3BAcc:494112]	GO:0060271:cilium morphogenesis;GO:0006468:protein phosphorylation;GO:0007049:cell cycle;GO:0051301:cell division;GO:0007275:multicellular organismal development;	GO:0005929:cilium;GO:0005737:cytoplasm;GO:0005634:nucleus;	GO:0005524:ATP binding;GO:0004693:cyclin-dependent protein serine/threonine kinase activity;
ENSDARG00000003869	1785	244	9.46	238	9.58	286	9.99	301	9.38	16	36748538	36760156	+	decr1	2%2C4-dienoyl CoA reductase 1%2C mitochondrial [Source:ZFIN%3BAcc:ZDB-GENE-040718-142]	-	-	GO:0000166:nucleotide binding;
ENSDARG00000003872	3844	355	6.39	341	6.37	455	7.38	608	8.8	7	28724910	28837318	+	ccdc102a	coiled-coil domain containing 102A [Source:NCBI gene%3BAcc:325319]	-	-	-
ENSDARG00000003877	5825	86	1.02	109	1.34	122	1.31	109	1.04	11	3909756	3959889	-	pbrm1	polybromo 1 [Source:ZFIN%3BAcc:ZDB-GENE-080926-4]	-	-	-
ENSDARG00000003899	1697	51	2.08	42	1.78	42	1.54	41	1.34	24	21122836	21131607	-	zdhhc23b	zinc finger DHHC-type containing 23b [Source:ZFIN%3BAcc:ZDB-GENE-040808-13]	-	-	GO:0046872:metal ion binding;
ENSDARG00000003900	2597	19	0.51	20	0.55	17	0.41	24	0.51	6	42031836	42036685	-	gpr61l	G protein-coupled receptor 61-like [Source:ZFIN%3BAcc:ZDB-GENE-131127-443]	-	-	-
ENSDARG00000003902	2094	3	0.1	7	0.24	4	0.12	4	0.11	17	27456804	27461321	+	ctsl.1	cathepsin L.1 [Source:ZFIN%3BAcc:ZDB-GENE-040718-61]	GO:0006508:proteolysis;	-	GO:0008234:cysteine-type peptidase activity;
ENSDARG00000003903	1098	0	0	0	0	3	0.17	0	0	16	29303971	29308947	+	hapln2	hyaluronan and proteoglycan link protein 2 [Source:ZFIN%3BAcc:ZDB-GENE-030131-8089]	GO:0007155:cell adhesion;	-	GO:0005540:hyaluronic acid binding;GO:0042802:identical protein binding;
ENSDARG00000003904	3482	1	0.02	0	0	2	0.04	3	0.05	6	49052741	49061086	+	sycp1	synaptonemal complex protein 1 [Source:ZFIN%3BAcc:ZDB-GENE-040910-6]	GO:0007130:synaptonemal complex assembly;	GO:0000795:synaptonemal complex;	-
ENSDARG00000003909	1968	0	0	0	0	2	0.06	4	0.11	2	11670270	11677705	+	ftr01	finTRIM family%2C member 1 [Source:ZFIN%3BAcc:ZDB-GENE-070705-491]	-	-	-
ENSDARG00000003910	8004	1106	9.56	944	8.47	1163	9.06	1322	9.19	15	20060643	20125331	-	med13b	mediator complex subunit 13b [Source:NCBI gene%3BAcc:564707]	GO:0006357:regulation of transcription from RNA polymerase II promoter;	GO:0016592:mediator complex;	GO:0001104:RNA polymerase II transcription cofactor activity;
ENSDARG00000003920	4930	12038	168.92	12473	181.73	14857	187.85	17423	196.57	21	13224239	13231101	-	setb	SET nuclear proto-oncogene b [Source:ZFIN%3BAcc:ZDB-GENE-030131-433]	GO:0006334:nucleosome assembly;	GO:0005634:nucleus;	-
ENSDARG00000003925	835	10	0.83	15	1.29	6	0.45	21	1.4	17	14711765	14712599	+	cx28.6	connexin 28.6 [Source:ZFIN%3BAcc:ZDB-GENE-040406-4]	GO:0007154:cell communication;	GO:0016021:integral component of membrane;GO:0005922:connexon complex;	-
ENSDARG00000003927	3544	766	14.95	715	14.49	801	14.09	784	12.3	16	43227724	43233509	-	cldn12	claudin 12 [Source:ZFIN%3BAcc:ZDB-GENE-010328-14]	-	GO:0016021:integral component of membrane;	-
ENSDARG00000003931	2164	233	7.45	241	8	309	8.9	314	8.07	19	20801060	20823099	+	cndp2	carnosine dipeptidase 2 [Source:ZFIN%3BAcc:ZDB-GENE-030131-5499]	GO:0006508:proteolysis;	-	GO:0008237:metallopeptidase activity;GO:0016805:dipeptidase activity;GO:0034701:tripeptidase activity;
ENSDARG00000003934	962	47	3.38	59	4.41	50	3.24	54	3.12	10	2582254	2585625	+	nxnl2	nucleoredoxin like 2 [Source:ZFIN%3BAcc:ZDB-GENE-041212-55]	-	-	-
ENSDARG00000003938	2421	3973	113.53	3928	116.54	4519	116.35	5112	117.45	15	26498339	26538989	-	rpa1	replication protein A1 [Source:NCBI gene%3BAcc:327491]	-	-	-
ENSDARG00000003940	3084	886	19.87	953	22.2	1101	22.25	1222	22.04	17	24718272	24727255	+	mtfr1l	mitochondrial fission regulator 1-like [Source:NCBI gene%3BAcc:334296]	-	-	-
ENSDARG00000003941	2129	1442	46.86	1530	51.62	1683	49.28	2111	55.15	24	23837519	23839647	-	rrs1	ribosome biogenesis regulator 1 homolog [Source:ZFIN%3BAcc:ZDB-GENE-030131-9345]	GO:0042254:ribosome biogenesis;	GO:0005634:nucleus;	-
ENSDARG00000003944	1211	0	0	0	0	0	0	0	0	2	13376099	13382726	-	nmur1b	neuromedin U receptor 1b [Source:ZFIN%3BAcc:ZDB-GENE-131121-154]	-	-	-
ENSDARG00000003952	3249	3564	75.89	3506	77.51	4040	77.51	4284	73.34	22	35179575	35194243	-	pfn2	profilin 2 [Source:ZFIN%3BAcc:ZDB-GENE-040115-4]	GO:0030036:actin cytoskeleton organization;	-	GO:0003779:actin binding;
ENSDARG00000003961	2456	133	3.75	111	3.25	151	3.83	120	2.72	6	42038358	42049350	-	parp3	poly (ADP-ribose) polymerase family%2C member 3 [Source:ZFIN%3BAcc:ZDB-GENE-030131-7435]	GO:0071696:ectodermal placode development;GO:0090299:regulation of neural crest formation;GO:0006471:protein ADP-ribosylation;	-	GO:0003950:NAD+ ADP-ribosyltransferase activity;
ENSDARG00000003963	3072	1127	25.38	1031	24.11	1215	24.65	1432	25.93	15	15516612	15593263	+	traf4a	tnf receptor-associated factor 4a [Source:ZFIN%3BAcc:ZDB-GENE-040308-1]	-	-	-
ENSDARG00000003965	2223	52	1.62	37	1.2	30	0.84	47	1.18	13	28267997	28272299	-	tlx1	T cell leukemia homeobox 1 [Source:ZFIN%3BAcc:ZDB-GENE-021021-2]	GO:0006355:regulation of transcription, DNA-templated;	GO:0005634:nucleus;	GO:0003700:sequence-specific DNA binding transcription factor activity;GO:0043565:sequence-specific DNA binding;
ENSDARG00000003968	1773	0	0	2	0.08	0	0	1	0.03	11	6446235	6452492	-	larp6b	La ribonucleoprotein 6%2C translational regulator b [Source:ZFIN%3BAcc:ZDB-GENE-041008-244]	GO:0006396:RNA processing;	GO:0030529:ribonucleoprotein complex;GO:0005634:nucleus;	GO:0003723:RNA binding;
ENSDARG00000003970	1551	2	0.09	0	0	1	0.04	0	0	3	52607039	52614747	-	trim35-13	tripartite motif containing 35-13 [Source:ZFIN%3BAcc:ZDB-GENE-110920-5]	-	-	-
ENSDARG00000003971	1686	304	12.47	303	12.91	309	11.42	388	12.8	25	32746014	32751982	-	isl2a	ISL LIM homeobox 2a [Source:NCBI gene%3BAcc:30157]	GO:0048675:axon extension;GO:0048665:neuron fate specification;GO:0006355:regulation of transcription, DNA-templated;	GO:0005634:nucleus;	GO:0008270:zinc ion binding;GO:0043565:sequence-specific DNA binding;GO:0003700:sequence-specific DNA binding transcription factor activity;
ENSDARG00000003973	1381	123	6.16	133	6.92	130	5.87	171	6.89	15	43961814	43978141	-	chordc1a	cysteine and histidine-rich domain (CHORD) containing 1a [Source:ZFIN%3BAcc:ZDB-GENE-050626-79]	-	-	-
ENSDARG00000003974	2560	667	18.02	606	17	694	16.9	939	20.4	11	33818179	33842715	+	spoplb	speckle type BTB/POZ protein like b [Source:NCBI gene%3BAcc:558170]	-	-	-
ENSDARG00000003977	3179	58	1.26	62	1.4	72	1.41	58	1.01	20	25879826	25887231	+	zgc:153896	zgc:153896 [Source:ZFIN%3BAcc:ZDB-GENE-060825-119]	-	-	-
ENSDARG00000003984	10673	685	4.44	579	3.9	726	4.24	753	3.92	10	23099365	23143104	+	LTN1	si:dkey-175g6.5 [Source:ZFIN%3BAcc:ZDB-GENE-091204-127]	-	-	-
ENSDARG00000003989	9998	13	0.09	8	0.06	21	0.13	26	0.14	3	21669545	21889616	+	crhr1	corticotropin releasing hormone receptor 1 [Source:ZFIN%3BAcc:ZDB-GENE-081231-1]	-	-	-
ENSDARG00000003991	2280	3	0.09	11	0.35	12	0.33	6	0.15	6	15071399	15101477	-	fhl2b	four and a half LIM domains 2b [Source:ZFIN%3BAcc:ZDB-GENE-041010-121]	-	-	GO:0008270:zinc ion binding;
ENSDARG00000003994	4089	48	0.81	32	0.56	42	0.64	83	1.13	18	28988373	29060842	+	syt9a	synaptotagmin IXa [Source:ZFIN%3BAcc:ZDB-GENE-031002-18]	-	-	-
ENSDARG00000003998	3459	5	0.1	3	0.06	11	0.2	16	0.26	17	20963477	20979077	-	phyhipla	phytanoyl-CoA 2-hydroxylase interacting protein-like a [Source:ZFIN%3BAcc:ZDB-GENE-061215-64]	-	-	-
ENSDARG00000004015	1902	3	0.11	10	0.38	8	0.26	5	0.15	7	71547747	71556734	+	adcyap1a	adenylate cyclase activating polypeptide 1a [Source:ZFIN%3BAcc:ZDB-GENE-020809-4]	GO:0007420:brain development;GO:0043010:camera-type eye development;	GO:0005576:extracellular region;	GO:0005179:hormone activity;
ENSDARG00000004017	2843	243	5.91	180	4.55	197	4.32	259	5.07	19	11984725	12018446	+	spag1a	sperm associated antigen 1a [Source:NCBI gene%3BAcc:564953]	-	-	-
ENSDARG00000004018	1250	60	3.32	68	3.91	63	3.14	93	4.14	23	34990693	35025117	+	CHST13	si:ch211-236h17.3 [Source:ZFIN%3BAcc:ZDB-GENE-030131-738]	-	-	-
ENSDARG00000004023	2303	370	11.11	398	12.41	413	11.18	534	12.9	5	40728613	40734045	-	isl1	ISL LIM homeobox 1 [Source:NCBI gene%3BAcc:30147]	GO:0048665:neuron fate specification;GO:0055011:atrial cardiac muscle cell differentiation;GO:0031017:exocrine pancreas development;GO:0048936:peripheral nervous system neuron axonogenesis;GO:0006355:regulation of transcription, DNA-templated;GO:0055012:ventricular cardiac muscle cell differentiation;GO:0021522:spinal cord motor neuron differentiation;	GO:0005634:nucleus;	GO:0008270:zinc ion binding;GO:0043565:sequence-specific DNA binding;GO:0003700:sequence-specific DNA binding transcription factor activity;
ENSDARG00000004034	3355	1393	28.72	1304	27.92	1309	24.32	1445	23.96	3	27713610	27769232	+	arhgdig	Rho GDP dissociation inhibitor (GDI) gamma [Source:ZFIN%3BAcc:ZDB-GENE-040426-1493]	-	-	-
ENSDARG00000004037	2926	388	9.17	365	8.96	425	9.05	530	10.08	13	23996070	24018916	-	cog2	component of oligomeric golgi complex 2 [Source:ZFIN%3BAcc:ZDB-GENE-040426-2671]	GO:0015031:protein transport;GO:0007030:Golgi organization;	GO:0016020:membrane;	-
ENSDARG00000004046	2355	480	14.1	573	17.48	665	17.6	672	15.87	14	31488579	31507744	+	phf6	PHD finger protein 6 [Source:ZFIN%3BAcc:ZDB-GENE-030131-5278]	-	-	GO:0008270:zinc ion binding;
ENSDARG00000004049	1776	906	35.29	813	32.88	908	31.87	1136	35.58	20	3312859	3319736	-	marcksa	myristoylated alanine-rich protein kinase C substrate a [Source:ZFIN%3BAcc:ZDB-GENE-050522-145]	-	-	-
ENSDARG00000004051	4305	12	0.19	2	0.03	1	0.01	7	0.09	7	58270474	58289847	-	CR354540.1	cytochrome P450%2C family 7%2C subfamily A%2C polypeptide 1b [Source:NCBI gene%3BAcc:559097]	-	-	-
ENSDARG00000004055	6300	371	4.07	303	3.45	352	3.48	469	4.14	4	18207655	18281160	-	uhrf1bp1l	UHRF1 binding protein 1-like [Source:ZFIN%3BAcc:ZDB-GENE-041210-177]	-	-	-
ENSDARG00000004059	1973	54	1.89	36	1.31	70	2.21	42	1.18	25	32390794	32400209	+	galk2	galactokinase 2 [Source:ZFIN%3BAcc:ZDB-GENE-041114-143]	-	-	-
ENSDARG00000004060	2804	885	21.83	758	19.42	1032	22.94	1159	22.99	11	35759652	35763323	-	bhlhe40	basic helix-loop-helix family%2C member e40 [Source:ZFIN%3BAcc:ZDB-GENE-030131-3133]	GO:0045892:negative regulation of transcription, DNA-templated;	GO:0005634:nucleus;	GO:0003677:DNA binding;GO:0046983:protein dimerization activity;
ENSDARG00000004074	5373	353	4.55	306	4.09	399	4.63	569	5.89	20	23972948	24122881	-	bach2b	BTB and CNC homology 1%2C basic leucine zipper transcription factor 2b [Source:ZFIN%3BAcc:ZDB-GENE-041001-139]	-	-	-
ENSDARG00000004078	3852	1217	21.86	1227	22.88	1835	29.69	2043	29.5	14	28438947	28459446	+	acsl4a	acyl-CoA synthetase long chain family member 4a [Source:ZFIN%3BAcc:ZDB-GENE-040426-1565]	-	-	-
ENSDARG00000004082	1404	154	7.59	125	6.39	189	8.39	186	7.37	5	23630384	23635908	+	cx39.9	connexin 39.9 [Source:ZFIN%3BAcc:ZDB-GENE-040406-2]	GO:0010644:cell communication by electrical coupling;GO:0031444:slow-twitch skeletal muscle fiber contraction;	GO:0016021:integral component of membrane;GO:0005922:connexon complex;	-
ENSDARG00000004094	4717	1204	17.66	1202	18.3	1290	17.05	1440	16.98	8	20140321	20192151	+	acsbg2	acyl-CoA synthetase bubblegum family member 2 [Source:ZFIN%3BAcc:ZDB-GENE-030131-7099]	-	-	-
ENSDARG00000004105	9153	398	3.01	320	2.51	382	2.6	524	3.18	6	33979523	34008901	-	tie1	tyrosine kinase with immunoglobulin-like and EGF-like domains 1 [Source:NCBI gene%3BAcc:30746]	-	-	-
ENSDARG00000004111	3663	5	0.09	2	0.04	0	0	1	0.02	20	26359756	26383375	-	esr1	estrogen receptor 1 [Source:NCBI gene%3BAcc:259252]	GO:0043401:steroid hormone mediated signaling pathway;GO:0006355:regulation of transcription, DNA-templated;GO:0009410:response to xenobiotic stimulus;GO:0032355:response to estradiol;GO:0048920:posterior lateral line neuromast primordium migration;	GO:0005634:nucleus;	GO:0008270:zinc ion binding;GO:0005496:steroid binding;GO:0043565:sequence-specific DNA binding;GO:0003700:sequence-specific DNA binding transcription factor activity;GO:0030284:estrogen receptor activity;
ENSDARG00000004114	3631	237	4.52	202	4	227	3.9	272	4.17	23	43424518	43448409	+	tti1	TELO2 interacting protein 1 [Source:ZFIN%3BAcc:ZDB-GENE-080819-3]	-	-	-
ENSDARG00000004115	3199	147	3.18	180	4.04	155	3.02	157	2.73	14	16483926	16754262	-	mgat4b	alpha-1%2C3-mannosyl-glycoprotein 4-beta-N-acetylglucosaminyltransferase B [Source:NCBI gene%3BAcc:431727]	-	-	-
ENSDARG00000004130	1775	71	2.77	88	3.56	77	2.7	85	2.66	5	19494198	19509695	+	mvk	mevalonate kinase [Source:ZFIN%3BAcc:ZDB-GENE-041114-37]	GO:0016310:phosphorylation;GO:0008299:isoprenoid biosynthetic process;	GO:0005737:cytoplasm;	GO:0004496:mevalonate kinase activity;GO:0005524:ATP binding;
ENSDARG00000004131	8188	175	1.48	144	1.26	216	1.64	278	1.89	24	15130979	15263142	-	rttn	rotatin [Source:ZFIN%3BAcc:ZDB-GENE-090609-5]	-	-	-
ENSDARG00000004132	6094	1007	11.43	880	10.37	980	10.02	1295	11.82	23	20145300	20177527	-	usp19	ubiquitin specific peptidase 19 [Source:ZFIN%3BAcc:ZDB-GENE-030131-3055]	-	-	-
ENSDARG00000004141	1485	53	2.47	34	1.64	53	2.22	49	1.84	15	15415623	15437530	+	zgc:92630	zgc:92630 [Source:ZFIN%3BAcc:ZDB-GENE-040718-449]	-	-	-
ENSDARG00000004150	3363	10	0.21	12	0.26	19	0.35	14	0.23	6	42051480	42112191	-	grm2a	glutamate receptor%2C metabotropic 2a [Source:ZFIN%3BAcc:ZDB-GENE-030131-8097]	-	-	-
ENSDARG00000004151	1521	191	8.69	162	7.65	188	7.7	230	8.41	13	1381953	1395002	+	rab23	RAB23%2C member RAS oncogene family [Source:ZFIN%3BAcc:ZDB-GENE-050522-328]	GO:0007264:small GTPase mediated signal transduction;GO:0015031:protein transport;	-	GO:0005525:GTP binding;
ENSDARG00000004154	1299	89	4.74	84	4.64	103	4.94	92	3.94	10	41914084	41921417	+	orai1b	ORAI calcium release-activated calcium modulator 1b [Source:NCBI gene%3BAcc:402892]	GO:0051928:positive regulation of calcium ion transport;GO:0045214:sarcomere organization;GO:0070588:calcium ion transmembrane transport;	GO:0005887:integral component of plasma membrane;	GO:0015279:store-operated calcium channel activity;
ENSDARG00000004158	4553	12	0.18	14	0.22	15	0.21	23	0.28	17	44780166	44923661	+	tmem63c	transmembrane protein 63C [Source:ZFIN%3BAcc:ZDB-GENE-120928-2]	-	-	-
ENSDARG00000004160	1816	923	35.16	829	32.79	914	31.37	1074	32.9	12	8822717	8882186	+	reep3b	receptor accessory protein 3b [Source:NCBI gene%3BAcc:393130]	-	GO:0016021:integral component of membrane;	-
ENSDARG00000004161	2114	1760	57.6	1795	60.99	1978	58.32	2631	69.23	21	43987153	44037106	+	ik	IK cytokine [Source:ZFIN%3BAcc:ZDB-GENE-030131-960]	-	-	-
ENSDARG00000004167	1604	125	5.39	118	5.28	105	4.08	128	4.44	2	7132281	7148449	+	zgc:110366	zgc:110366 [Source:ZFIN%3BAcc:ZDB-GENE-050417-302]	GO:0055114:oxidation-reduction process;	-	GO:0016491:oxidoreductase activity;
ENSDARG00000004169	4134	2310	38.66	2223	38.62	2852	43	3238	43.57	19	17205143	17210928	-	stmn1a	stathmin 1a [Source:ZFIN%3BAcc:ZDB-GENE-031006-14]	GO:0031110:regulation of microtubule polymerization or depolymerization;	-	-
ENSDARG00000004171	2325	577	17.17	566	17.49	652	17.48	713	17.06	16	10828787	10837245	-	rabac1	Rab acceptor 1 (prenylated) [Source:ZFIN%3BAcc:ZDB-GENE-040625-146]	-	-	-
ENSDARG00000004173	4337	4533	72.31	4025	66.66	4533	65.15	5181	66.45	2	37176814	37206080	+	copa	coatomer protein complex%2C subunit alpha [Source:ZFIN%3BAcc:ZDB-GENE-020905-2]	GO:0016192:vesicle-mediated transport;GO:0030903:notochord development;GO:0006886:intracellular protein transport;	GO:0030126:COPI vesicle coat;	GO:0005198:structural molecule activity;
ENSDARG00000004174	8596	6160	49.57	5705	47.67	6587	47.77	7975	51.6	25	17313568	17346929	+	cnot1	CCR4-NOT transcription complex%2C subunit 1 [Source:NCBI gene%3BAcc:448949]	GO:0006355:regulation of transcription, DNA-templated;	-	-
ENSDARG00000004176	5259	114	1.5	120	1.64	122	1.45	152	1.61	16	5898878	6182429	+	ulk4	unc-51 like kinase 4 [Source:ZFIN%3BAcc:ZDB-GENE-100922-243]	-	-	-
ENSDARG00000004177	1725	91	3.65	83	3.46	60	2.17	109	3.51	21	15870752	15898689	+	fam169ab	family with sequence similarity 169 member Ab [Source:ZFIN%3BAcc:ZDB-GENE-091118-95]	-	-	-
ENSDARG00000004184	8675	406	3.24	350	2.9	424	3.05	600	3.85	10	37268854	37394957	+	nf1b	neurofibromin 1b [Source:ZFIN%3BAcc:ZDB-GENE-091111-4]	-	-	-
ENSDARG00000004187	1612	12	0.51	5	0.22	8	0.31	13	0.45	21	5169154	5174054	+	zgc:122979	zgc:122979 [Source:ZFIN%3BAcc:ZDB-GENE-051127-45]	-	-	-
ENSDARG00000004189	2509	2378	65.57	2295	65.7	2883	71.63	3102	68.77	3	24050043	24071582	+	cbx1a	chromobox homolog 1a (HP1 beta homolog Drosophila) [Source:ZFIN%3BAcc:ZDB-GENE-030131-4945]	-	GO:0005634:nucleus;	-
ENSDARG00000004196	6425	761	8.19	663	7.41	789	7.65	927	8.03	7	22911610	22956889	-	tnfsf10l	TNF superfamily member 10%2C like [Source:ZFIN%3BAcc:ZDB-GENE-010801-1]	GO:0006955:immune response;	GO:0005615:extracellular space;GO:0016020:membrane;	GO:0005125:cytokine activity;GO:0005164:tumor necrosis factor receptor binding;
ENSDARG00000004199	5755	36	0.43	47	0.59	48	0.52	43	0.42	25	27531874	27541621	-	spam1	sperm adhesion molecule 1 [Source:ZFIN%3BAcc:ZDB-GENE-050506-63]	GO:0005975:carbohydrate metabolic process;	-	GO:0004415:hyalurononglucosaminidase activity;
ENSDARG00000004204	2483	49	1.37	53	1.53	48	1.21	38	0.85	9	33758720	33781845	-	efhc2	EF-hand domain (C-terminal) containing 2 [Source:NCBI gene%3BAcc:567323]	-	-	GO:0005509:calcium ion binding;
ENSDARG00000004211	2168	376	12	354	11.73	384	11.04	378	9.7	16	17639896	17660594	-	ccdc106a	coiled-coil domain containing 106a [Source:ZFIN%3BAcc:ZDB-GENE-050220-4]	-	-	-
ENSDARG00000004218	3115	680	15.1	654	15.08	718	14.37	900	16.07	23	26979174	27006062	+	rnd1b	Rho family GTPase 1b [Source:ZFIN%3BAcc:ZDB-GENE-060315-7]	GO:0007264:small GTPase mediated signal transduction;	GO:0005622:intracellular;GO:0016020:membrane;	GO:0005525:GTP binding;
ENSDARG00000004219	1890	5	0.18	9	0.34	7	0.23	8	0.24	16	248239	263658	-	slc6a3	solute carrier family 6 member 3 [Source:ZFIN%3BAcc:ZDB-GENE-010316-1]	GO:0006836:neurotransmitter transport;	GO:0016021:integral component of membrane;	GO:0005328:neurotransmitter:sodium symporter activity;
ENSDARG00000004227	4092	144	2.43	116	2.04	118	1.8	147	2	4	2752852	2868112	-	pde3a	phosphodiesterase 3A%2C cGMP-inhibited [Source:ZFIN%3BAcc:ZDB-GENE-041210-23]	-	-	-
ENSDARG00000004232	3094	1852	41.41	1886	43.78	1919	38.66	2226	40.02	5	36693859	36701760	+	dlb	deltaB [Source:NCBI gene%3BAcc:30141]	GO:0030154:cell differentiation;GO:0007219:Notch signaling pathway;GO:0021536:diencephalon development;GO:0030901:midbrain development;	GO:0016021:integral component of membrane;	GO:0005509:calcium ion binding;
ENSDARG00000004243	2316	9	0.27	0	0	3	0.08	4	0.1	6	13606410	13688991	+	asic4b	acid-sensing (proton-gated) ion channel family member 4b [Source:NCBI gene%3BAcc:407667]	GO:0006814:sodium ion transport;	GO:0005887:integral component of plasma membrane;	GO:0005272:sodium channel activity;
ENSDARG00000004246	10246	1180	7.97	1111	7.79	1287	7.83	1558	8.46	1	23783349	23912788	+	slit2	slit homolog 2 (Drosophila) [Source:ZFIN%3BAcc:ZDB-GENE-010306-3]	GO:0033564:anterior/posterior axon guidance;GO:0007414:axonal defasciculation;GO:0030517:negative regulation of axon extension;GO:0001763:morphogenesis of a branching structure;GO:0003262:endocardial progenitor cell migration to the midline involved in heart field formation;	GO:0005576:extracellular region;	GO:0005509:calcium ion binding;
ENSDARG00000004251	1734	750	29.92	564	23.36	681	24.48	898	28.81	5	26138313	26146488	+	dhfr	dihydrofolate reductase [Source:ZFIN%3BAcc:ZDB-GENE-010406-5]	GO:0055114:oxidation-reduction process;GO:0046655:folic acid metabolic process;GO:0009165:nucleotide biosynthetic process;GO:0001947:heart looping;GO:0006545:glycine biosynthetic process;GO:0060047:heart contraction;	-	GO:0004146:dihydrofolate reductase activity;GO:0050661:NADP binding;
ENSDARG00000004256	2132	136	4.41	125	4.21	165	4.82	179	4.67	5	36513605	36520117	+	wnt11f2	wnt 11%2C family member 2 [Source:NCBI gene%3BAcc:791595]	GO:0045892:negative regulation of transcription, DNA-templated;GO:0031016:pancreas development;GO:0000132:establishment of mitotic spindle orientation;GO:0090037:positive regulation of protein kinase C signaling;GO:0009952:anterior/posterior pattern specification;GO:0030336:negative regulation of cell migration;GO:0016337:single organismal cell-cell adhesion;GO:0035567:non-canonical Wnt signaling…	GO:0005615:extracellular space;GO:0005886:plasma membrane;GO:0005737:cytoplasm;GO:0005578:proteinaceous extracellular matrix;	GO:0044212:transcription regulatory region DNA binding;GO:0001664:G-protein coupled receptor binding;GO:0030295:protein kinase activator activity;
ENSDARG00000004260	2406	8	0.23	0	0	2	0.05	5	0.12	21	22124736	22142972	+	cul5b	cullin 5b [Source:ZFIN%3BAcc:ZDB-GENE-091113-45]	GO:0006511:ubiquitin-dependent protein catabolic process;	GO:0031461:cullin-RING ubiquitin ligase complex;	GO:0031625:ubiquitin protein ligase binding;
ENSDARG00000004261	2010	2498	85.98	2423	86.59	2735	84.82	2996	82.91	14	26404640	26411918	-	tmed9	transmembrane p24 trafficking protein 9 [Source:ZFIN%3BAcc:ZDB-GENE-050417-434]	GO:0006810:transport;	GO:0016021:integral component of membrane;	-
ENSDARG00000004262	1829	59	2.23	55	2.16	52	1.77	57	1.73	20	5237286	5254610	-	cyp46a1.2	cytochrome P450%2C family 46%2C subfamily A%2C polypeptide 1%2C tandem duplicate 2 [Source:ZFIN%3BAcc:ZDB-GENE-040426-1184]	GO:0055114:oxidation-reduction process;	-	GO:0020037:heme binding;GO:0016705:oxidoreductase activity, acting on paired donors, with incorporation or reduction of molecular oxygen;GO:0004497:monooxygenase activity;GO:0005506:iron ion binding;GO:0009055:electron carrier activity;
ENSDARG00000004270	4852	286	4.08	258	3.82	285	3.66	341	3.91	14	30773764	30794824	+	atl3	atlastin 3 [Source:ZFIN%3BAcc:ZDB-GENE-041010-109]	-	-	GO:0003924:GTPase activity;GO:0005525:GTP binding;
ENSDARG00000004274	1067	31	2.01	62	4.17	52	3.04	40	2.09	24	37631632	37640705	-	zgc:112496	zgc:112496 [Source:ZFIN%3BAcc:ZDB-GENE-050320-25]	GO:0006281:DNA repair;	-	GO:0003677:DNA binding;
ENSDARG00000004280	3665	1228	23.18	1249	24.48	1446	24.59	1513	22.96	19	12406583	12431988	+	seh1l	SEH1-like (S. cerevisiae) [Source:NCBI gene%3BAcc:334749]	GO:0006999:nuclear pore organization;GO:0006810:transport;GO:0051315:attachment of mitotic spindle microtubules to kinetochore;GO:0007080:mitotic metaphase plate congression;GO:0051301:cell division;GO:0015031:protein transport;GO:0051028:mRNA transport;	GO:0031080:nuclear pore outer ring;GO:0000776:kinetochore;GO:0000777:condensed chromosome kinetochore;	-
ENSDARG00000004282	1552	101	4.5	74	3.42	83	3.33	89	3.19	11	457423	472547	-	zgc:77375	zgc:77375 [Source:ZFIN%3BAcc:ZDB-GENE-040426-1827]	GO:0008152:metabolic process;	-	GO:0016787:hydrolase activity;
ENSDARG00000004291	4716	67	0.98	50	0.76	86	1.14	98	1.16	2	49884696	49978227	-	hecw1b	HECT%2C C2 and WW domain containing E3 ubiquitin protein ligase 1b [Source:ZFIN%3BAcc:ZDB-GENE-060503-2]	-	-	-
ENSDARG00000004296	2559	615	16.63	653	18.33	744	18.12	816	17.74	10	10801564	10824286	+	ambp	alpha-1-microglobulin/bikunin precursor [Source:ZFIN%3BAcc:ZDB-GENE-040426-1608]	-	GO:0005576:extracellular region;	GO:0004867:serine-type endopeptidase inhibitor activity;GO:0036094:small molecule binding;
ENSDARG00000004297	2796	843	20.86	903	23.2	869	19.37	965	19.2	17	11327164	11329959	-	irf2bpl	interferon regulatory factor 2 binding protein-like [Source:ZFIN%3BAcc:ZDB-GENE-040426-1968]	-	-	-
ENSDARG00000004301	1957	107	3.78	98	3.6	127	4.05	150	4.26	21	30937690	30951909	+	rhogb	ras homolog family member Gb [Source:ZFIN%3BAcc:ZDB-GENE-030131-8877]	GO:0009617:response to bacterium;GO:0007264:small GTPase mediated signal transduction;	GO:0005622:intracellular;GO:0016020:membrane;	GO:0005525:GTP binding;
ENSDARG00000004302	3102	13	0.29	30	0.69	25	0.5	38	0.68	11	40649412	40674070	+	slc45a1	solute carrier family 45 member 1 [Source:ZFIN%3BAcc:ZDB-GENE-070112-2152]	GO:0055085:transmembrane transport;	GO:0016021:integral component of membrane;	-
ENSDARG00000004305	1672	59	2.44	43	1.85	56	2.09	60	2	9	33009284	33055440	+	vangl1	VANGL planar cell polarity protein 1 [Source:ZFIN%3BAcc:ZDB-GENE-040621-2]	GO:0007275:multicellular organismal development;	GO:0016021:integral component of membrane;	-
ENSDARG00000004306	2122	144	4.69	138	4.67	165	4.85	189	4.95	2	32743807	32756706	+	klhl18	kelch-like family member 18 [Source:ZFIN%3BAcc:ZDB-GENE-030131-5785]	-	-	-
ENSDARG00000004307	1237	84	4.7	100	5.81	126	6.35	146	6.56	9	23071149	23118350	-	lypd6	LY6/PLAUR domain containing 6 [Source:NCBI gene%3BAcc:447932]	-	-	-
ENSDARG00000004308	1782	218	8.46	197	7.94	263	9.2	232	7.24	16	25593339	25597909	-	fam8a1b	family with sequence similarity 8 member A1b [Source:ZFIN%3BAcc:ZDB-GENE-050410-14]	-	-	-
ENSDARG00000004311	1490	293	13.6	293	14.12	336	14.06	302	11.27	19	29337789	29363779	+	ldlrap1a	low density lipoprotein receptor adaptor protein 1a [Source:ZFIN%3BAcc:ZDB-GENE-030328-13]	-	-	-
ENSDARG00000004318	1653	184	7.7	159	6.91	190	7.16	246	8.28	8	30425700	30450072	+	cbwd	COBW domain containing [Source:ZFIN%3BAcc:ZDB-GENE-040426-2388]	-	-	-
ENSDARG00000004322	6103	9	0.1	2	0.02	3	0.03	12	0.11	3	56882832	56896702	-	ush1ga	Usher syndrome 1Ga (autosomal recessive) [Source:ZFIN%3BAcc:ZDB-GENE-131120-173]	-	-	-
ENSDARG00000004325	2090	92	3.05	92	3.16	99	2.95	105	2.79	23	24973773	24985272	+	casp9	caspase 9%2C apoptosis-related cysteine peptidase [Source:ZFIN%3BAcc:ZDB-GENE-030825-5]	GO:0006508:proteolysis;GO:0043065:positive regulation of apoptotic process;	GO:0005622:intracellular;	GO:0004197:cysteine-type endopeptidase activity;
ENSDARG00000004328	1102	342	21.47	296	19.29	387	21.89	502	25.34	16	4654333	4686245	+	LIN28A	si:ch1073-284b18.2 [Source:ZFIN%3BAcc:ZDB-GENE-110914-157]	-	-	-
ENSDARG00000004336	3102	471	10.5	413	9.56	534	10.73	674	12.09	4	15605844	15816540	+	exoc4	exocyst complex component 4 [Source:ZFIN%3BAcc:ZDB-GENE-041210-112]	GO:0006904:vesicle docking involved in exocytosis;GO:0015031:protein transport;	GO:0000145:exocyst;	-
ENSDARG00000004343	3168	584	12.75	600	13.6	610	12	766	13.45	19	26922780	26932829	+	nelfe	negative elongation factor complex member E [Source:ZFIN%3BAcc:ZDB-GENE-040718-69]	-	-	GO:0003676:nucleic acid binding;GO:0000166:nucleotide binding;
ENSDARG00000004358	1958	3	0.11	2	0.07	6	0.19	6	0.17	16	12022543	12049762	+	gnb3a	guanine nucleotide binding protein (G protein)%2C beta polypeptide 3a [Source:ZFIN%3BAcc:ZDB-GENE-040718-134]	-	-	-
ENSDARG00000004363	6115	506	5.72	509	5.98	468	4.77	502	4.57	10	31938796	32041846	+	lhfpl6	LHFPL tetraspan subfamily member 6 [Source:NCBI gene%3BAcc:494110]	-	GO:0016021:integral component of membrane;	-
ENSDARG00000004372	5982	639	7.39	536	6.44	640	6.67	844	7.85	23	25354856	25448872	+	fmnl3	formin-like 3 [Source:NCBI gene%3BAcc:407694]	-	-	-
ENSDARG00000004377	4978	488	6.78	491	7.08	756	9.47	771	8.61	17	14614145	14691576	-	ppp1r13ba	protein phosphatase 1%2C regulatory subunit 13Ba [Source:ZFIN%3BAcc:ZDB-GENE-030131-9805]	-	-	-
ENSDARG00000004378	4404	321	5.04	295	4.81	356	5.04	481	6.07	19	43359075	43432415	+	yrk	Yes-related kinase [Source:ZFIN%3BAcc:ZDB-GENE-030131-9517]	GO:0006468:protein phosphorylation;	-	GO:0004713:protein tyrosine kinase activity;GO:0005524:ATP binding;
ENSDARG00000004386	3824	141	2.55	141	2.65	185	3.02	273	3.97	4	9669717	9690419	+	si:dkey-153k10.9	si:dkey-153k10.9 [Source:ZFIN%3BAcc:ZDB-GENE-030131-3893]	-	-	-
ENSDARG00000004392	1647	296	12.43	304	13.26	254	9.61	313	10.57	5	27404946	27415081	+	hdr	hematopoietic death receptor [Source:ZFIN%3BAcc:ZDB-GENE-030826-5]	GO:0043280:positive regulation of cysteine-type endopeptidase activity involved in apoptotic process;GO:0007165:signal transduction;GO:0043065:positive regulation of apoptotic process;	-	-
ENSDARG00000004396	1810	161	6.15	166	6.59	229	7.89	201	6.18	2	7749394	7757273	-	b3gnt5b	UDP-GlcNAc:betaGal beta-1%2C3-N-acetylglucosaminyltransferase 5b [Source:NCBI gene%3BAcc:791470]	GO:0006486:protein glycosylation;	GO:0000139:Golgi membrane;GO:0016021:integral component of membrane;	GO:0008378:galactosyltransferase activity;GO:0047256:lactosylceramide 1,3-N-acetyl-beta-D-glucosaminyltransferase activity;
ENSDARG00000004402	2062	189	6.34	177	6.17	226	6.83	236	6.37	14	36231126	36268710	+	elovl6	ELOVL fatty acid elongase 6 [Source:NCBI gene%3BAcc:317738]	GO:0019367:fatty acid elongation, saturated fatty acid;GO:0042759:long-chain fatty acid biosynthetic process;	GO:0005789:endoplasmic reticulum membrane;GO:0016021:integral component of membrane;	GO:0016740:transferase activity;
ENSDARG00000004405	2586	55	1.47	31	0.86	17	0.41	51	1.1	19	18118321	18130567	-	snx10a	sorting nexin 10a [Source:NCBI gene%3BAcc:403027]	GO:0007154:cell communication;	-	GO:0035091:phosphatidylinositol binding;
ENSDARG00000004406	2579	82	2.2	66	1.84	64	1.55	77	1.66	5	72129708	72136548	-	spra	sepiapterin reductase a [Source:ZFIN%3BAcc:ZDB-GENE-050522-412]	GO:0006729:tetrahydrobiopterin biosynthetic process;GO:0055114:oxidation-reduction process;	-	GO:0004757:sepiapterin reductase activity;GO:0000166:nucleotide binding;
ENSDARG00000004415	7466	819	7.59	747	7.19	944	7.88	1034	7.7	12	30977736	31103906	-	tcf7l2	transcription factor 7 like 2 [Source:ZFIN%3BAcc:ZDB-GENE-991110-8]	GO:0044333:Wnt signaling pathway involved in digestive tract morphogenesis;GO:0006357:regulation of transcription from RNA polymerase II promoter;GO:0007420:brain development;GO:0060729:intestinal epithelial structure maintenance;GO:0060070:canonical Wnt signaling pathway;GO:0048699:generation of neurons;	GO:0005667:transcription factor complex;	GO:0008013:beta-catenin binding;GO:0044212:transcription regulatory region DNA binding;GO:0043565:sequence-specific DNA binding;GO:0003700:sequence-specific DNA binding transcription factor activity;GO:0003682:chromatin binding;
ENSDARG00000004427	630	835	91.69	884	100.79	962	95.18	738	65.16	1	51039558	51042328	+	dpy30	dpy-30 histone methyltransferase complex regulatory subunit [Source:ZFIN%3BAcc:ZDB-GENE-040718-136]	-	-	-
ENSDARG00000004433	2634	79	2.07	77	2.1	104	2.46	83	1.75	14	38891722	38929885	-	btk	Bruton agammaglobulinemia tyrosine kinase [Source:ZFIN%3BAcc:ZDB-GENE-070531-1]	-	-	-
ENSDARG00000004436	1894	220	8.04	258	9.78	327	10.76	324	9.52	19	33258572	33275035	-	fam92a1	family with sequence similarity 92 member A1 [Source:NCBI gene%3BAcc:445210]	-	-	-
ENSDARG00000004445	7623	1	0.01	0	0	3	0.02	0	0	10	25219728	25272236	+	grm5a	glutamate receptor%2C metabotropic 5a [Source:ZFIN%3BAcc:ZDB-GENE-090821-9]	-	-	-
ENSDARG00000004447	2250	185	5.69	149	4.76	238	6.59	230	5.69	7	38685545	38689562	-	aplnr2	apelin receptor 2 [Source:ZFIN%3BAcc:ZDB-GENE-030131-4347]	-	-	-
ENSDARG00000004451	1686	216	8.86	198	8.44	199	7.36	282	9.3	21	16172931	16219400	-	tnfrsfa	tumor necrosis factor receptor superfamily%2C member a [Source:ZFIN%3BAcc:ZDB-GENE-010802-1]	GO:0007165:signal transduction;GO:0043065:positive regulation of apoptotic process;	-	-
ENSDARG00000004452	3244	5039	107.46	4898	108.45	5658	108.72	6518	111.76	23	29357790	29362845	+	tardbpl	TAR DNA binding protein%2C like [Source:ZFIN%3BAcc:ZDB-GENE-031030-1]	-	-	GO:0003676:nucleic acid binding;GO:0000166:nucleotide binding;
ENSDARG00000004455	2337	107	3.17	121	3.72	158	4.21	202	4.81	5	42097608	42120927	+	p2rx5	purinergic receptor P2X%2C ligand-gated ion channel%2C 5 [Source:ZFIN%3BAcc:ZDB-GENE-030319-5]	GO:0035590:purinergic nucleotide receptor signaling pathway;GO:0006812:cation transport;	GO:0016021:integral component of membrane;GO:0005886:plasma membrane;	GO:0005524:ATP binding;GO:0004931:extracellular ATP-gated cation channel activity;GO:0001614:purinergic nucleotide receptor activity;
ENSDARG00000004459	1161	0	0	2	0.12	0	0	9	0.43	3	32594357	32619634	+	unc119.2	unc-119 lipid binding chaperone B homolog 2 [Source:ZFIN%3BAcc:ZDB-GENE-030131-7635]	-	-	-
ENSDARG00000004460	1764	447	17.53	377	15.35	474	16.75	572	18.04	13	11550454	11570568	+	desi2	desumoylating isopeptidase 2 [Source:NCBI gene%3BAcc:445138]	GO:0006508:proteolysis;GO:0060027:convergent extension involved in gastrulation;	GO:0005737:cytoplasm;	GO:0008233:peptidase activity;
ENSDARG00000004470	5968	1189	13.78	1153	13.88	1232	12.87	1403	13.08	3	46762703	46795783	+	prkcsh	protein kinase C substrate 80K-H [Source:ZFIN%3BAcc:ZDB-GENE-040426-770]	GO:0016310:phosphorylation;GO:0006491:N-glycan processing;GO:0048793:pronephros development;	GO:0005783:endoplasmic reticulum;	GO:0016301:kinase activity;GO:0005509:calcium ion binding;
ENSDARG00000004472	2764	108	2.7	97	2.52	98	2.21	132	2.66	19	27479563	27515651	+	atat1	alpha tubulin acetyltransferase 1 [Source:NCBI gene%3BAcc:406389]	GO:0071929:alpha-tubulin acetylation;	-	GO:0019799:tubulin N-acetyltransferase activity;
ENSDARG00000004473	2280	4	0.12	9	0.28	6	0.16	16	0.39	12	28749189	28770817	+	tbx21	T-box transcription factor 21 [Source:ZFIN%3BAcc:ZDB-GENE-080104-3]	GO:0006355:regulation of transcription, DNA-templated;	GO:0005634:nucleus;	GO:0003700:sequence-specific DNA binding transcription factor activity;GO:0003677:DNA binding;
ENSDARG00000004492	1080	146	9.35	140	9.31	184	10.62	198	10.2	18	46010081	46020138	-	pcyt1ab	phosphate cytidylyltransferase 1%2C choline%2C alpha b [Source:ZFIN%3BAcc:ZDB-GENE-050522-114]	-	-	-
ENSDARG00000004497	1762	141	5.54	122	4.97	116	4.1	118	3.72	4	14957360	14968641	+	tspan33a	tetraspanin 33a [Source:NCBI gene%3BAcc:436890]	-	GO:0016021:integral component of membrane;	-
ENSDARG00000004498	1396	0	0	0	0	0	0	1	0.04	19	24982672	24988640	-	xkr8.1	XK%2C Kell blood group complex subunit-related family%2C member 8%2C tandem duplicate 1 [Source:ZFIN%3BAcc:ZDB-GENE-110106-1]	-	-	-
ENSDARG00000004502	1869	56	2.07	67	2.57	63	2.1	87	2.59	22	38276024	38294242	+	rcor3	REST corepressor 3 [Source:ZFIN%3BAcc:ZDB-GENE-050208-371]	-	GO:0005634:nucleus;	GO:0003677:DNA binding;GO:0003682:chromatin binding;
ENSDARG00000004517	2680	1329	34.31	1289	34.55	1442	33.54	1500	31.13	20	25625872	25639508	+	ppat	phosphoribosyl pyrophosphate amidotransferase [Source:ZFIN%3BAcc:ZDB-GENE-041210-323]	GO:0009113:purine nucleobase biosynthetic process;GO:0009116:nucleoside metabolic process;GO:0006189:'de novo' IMP biosynthetic process;GO:0006164:purine nucleotide biosynthetic process;	-	GO:0051536:iron-sulfur cluster binding;GO:0046872:metal ion binding;GO:0004044:amidophosphoribosyltransferase activity;
ENSDARG00000004525	2859	315	7.62	354	8.89	394	8.59	461	8.97	2	3044992	3062793	+	C2H1orf35	zgc:63882 [Source:ZFIN%3BAcc:ZDB-GENE-040426-1286]	-	-	-
ENSDARG00000004527	785	606	53.4	644	58.93	763	60.59	744	52.72	14	28432737	28437426	+	pin4	protein (peptidylprolyl cis/trans isomerase) NIMA-interacting%2C 4 (parvulin) [Source:NCBI gene%3BAcc:553574]	-	-	GO:0016853:isomerase activity;
ENSDARG00000004529	2616	1	0.03	2	0.05	8	0.19	3	0.06	18	14277003	14332060	+	zgc:173742	zgc:173742 [Source:ZFIN%3BAcc:ZDB-GENE-030131-6489]	-	-	-
ENSDARG00000004537	13970	2208	10.93	1802	9.27	2175	9.7	3035	12.08	15	23382199	23420170	-	kmt2a	lysine (K)-specific methyltransferase 2A [Source:ZFIN%3BAcc:ZDB-GENE-080521-3]	GO:0035556:intracellular signal transduction;GO:0032259:methylation;	GO:0005634:nucleus;	GO:0003677:DNA binding;GO:0008270:zinc ion binding;GO:0008168:methyltransferase activity;
ENSDARG00000004539	2373	408	11.89	399	12.08	360	9.46	468	10.97	2	20916497	20923864	-	ptgs2a	prostaglandin-endoperoxide synthase 2a [Source:ZFIN%3BAcc:ZDB-GENE-020530-2]	GO:0055114:oxidation-reduction process;GO:0042221:response to chemical;GO:0006979:response to oxidative stress;	-	GO:0020037:heme binding;GO:0004601:peroxidase activity;
ENSDARG00000004561	1964	2	0.07	4	0.15	3	0.1	1	0.03	16	13020776	13109749	-	prkcg	protein kinase C%2C gamma [Source:ZFIN%3BAcc:ZDB-GENE-090206-1]	-	-	-
ENSDARG00000004574	3527	272	5.34	226	4.6	278	4.91	340	5.36	20	38543314	38584161	+	gtf3c2	general transcription factor IIIC%2C polypeptide 2%2C beta [Source:ZFIN%3BAcc:ZDB-GENE-041014-349]	-	-	-
ENSDARG00000004576	3297	444	9.32	462	10.07	529	10	607	10.24	17	43410753	43428397	-	plk4	polo-like kinase 4 (Drosophila) [Source:NCBI gene%3BAcc:368390]	GO:0006468:protein phosphorylation;GO:0046601:positive regulation of centriole replication;	GO:0005730:nucleolus;GO:0005814:centriole;	GO:0004674:protein serine/threonine kinase activity;GO:0004713:protein tyrosine kinase activity;GO:0005524:ATP binding;
ENSDARG00000004577	1165	24	1.43	26	1.6	27	1.44	35	1.67	25	19999623	20003528	+	zgc:194665	zgc:194665 [Source:ZFIN%3BAcc:ZDB-GENE-080722-38]	-	GO:0016021:integral component of membrane;	-
ENSDARG00000004580	1761	49	1.92	72	2.94	64	2.27	70	2.21	2	36026183	36040820	-	nmnat2	nicotinamide nucleotide adenylyltransferase 2 [Source:NCBI gene%3BAcc:336257]	GO:0009435:NAD biosynthetic process;	GO:0005794:Golgi apparatus;	GO:0004515:nicotinate-nucleotide adenylyltransferase activity;GO:0005524:ATP binding;
ENSDARG00000004581	4360	910	14.44	825	13.59	877	12.54	1199	15.3	20	26987416	27003298	+	sel1l	SEL1L adaptor subunit of ERAD E3 ubiquitin ligase [Source:ZFIN%3BAcc:ZDB-GENE-041001-122]	-	-	-
ENSDARG00000004586	3114	15	0.33	27	0.62	19	0.38	42	0.75	16	45796602	45854882	-	ntrk1	neurotrophic tyrosine kinase%2C receptor%2C type 1 [Source:ZFIN%3BAcc:ZDB-GENE-980526-118]	-	-	-
ENSDARG00000004587	2264	443	13.54	405	12.85	480	13.22	639	15.7	5	23597140	23605948	+	kat5a	K(lysine) acetyltransferase 5a [Source:ZFIN%3BAcc:ZDB-GENE-040718-57]	GO:0006355:regulation of transcription, DNA-templated;	GO:0005634:nucleus;	GO:0016747:transferase activity, transferring acyl groups other than amino-acyl groups;
ENSDARG00000004588	3261	1112	23.59	1153	25.4	1299	24.83	1539	26.25	19	28786149	28789409	-	sox4a	SRY-box transcription factor 4a [Source:ZFIN%3BAcc:ZDB-GENE-030131-8290]	-	-	-
ENSDARG00000004592	3156	20	0.44	17	0.39	28	0.55	33	0.58	4	2619132	2623487	+	gpr22a	G protein-coupled receptor 22a [Source:NCBI gene%3BAcc:504167]	-	-	-
ENSDARG00000004594	6146	491	5.53	500	5.84	563	5.71	699	6.33	25	26895962	26913274	+	znf800a	zinc finger protein 800a [Source:ZFIN%3BAcc:ZDB-GENE-041008-151]	-	-	-
ENSDARG00000004597	4695	10	0.15	26	0.4	22	0.29	25	0.3	3	30369765	30434016	-	lrrc4ba	leucine rich repeat containing 4Ba [Source:ZFIN%3BAcc:ZDB-GENE-080327-25]	-	-	-
ENSDARG00000004598	3124	0	0	0	0	0	0	0	0	15	31466978	31470101	+	or102-2	odorant receptor%2C family C%2C subfamily 102%2C member 2 [Source:ZFIN%3BAcc:ZDB-GENE-010308-4]	GO:0007186:G-protein coupled receptor signaling pathway;GO:0007608:sensory perception of smell;	GO:0005886:plasma membrane;GO:0016021:integral component of membrane;	GO:0004930:G-protein coupled receptor activity;GO:0004984:olfactory receptor activity;
ENSDARG00000004616	2132	504	16.35	505	17.01	531	15.52	623	16.25	5	23608026	23619911	-	mtmr2	myotubularin related protein 2 [Source:NCBI gene%3BAcc:30644]	GO:0006470:protein dephosphorylation;	GO:0016020:membrane;GO:0005737:cytoplasm;	GO:0004725:protein tyrosine phosphatase activity;
ENSDARG00000004618	2149	55	1.77	73	2.44	66	1.91	72	1.86	21	17951286	17956739	-	stx2a	syntaxin 2a [Source:ZFIN%3BAcc:ZDB-GENE-040801-80]	-	-	-
ENSDARG00000004621	4527	630	9.63	542	8.6	634	8.73	599	7.36	1	38649141	38756904	-	gpm6ab	glycoprotein M6Ab [Source:ZFIN%3BAcc:ZDB-GENE-030710-8]	GO:0031175:neuron projection development;GO:0051489:regulation of filopodium assembly;	GO:0016021:integral component of membrane;	-
ENSDARG00000004627	4563	0	0	1	0.02	1	0.01	1	0.01	10	30997238	31016806	-	panx3	pannexin 3 [Source:ZFIN%3BAcc:ZDB-GENE-091204-114]	-	-	-
ENSDARG00000004632	2335	327	9.69	281	8.64	280	7.47	340	8.1	11	31558006	31603692	+	egln1b	egl-9 family hypoxia-inducible factor 1b [Source:ZFIN%3BAcc:ZDB-GENE-040718-338]	GO:0055114:oxidation-reduction process;	-	GO:0031418:L-ascorbic acid binding;GO:0005506:iron ion binding;GO:0016706:oxidoreductase activity, acting on paired donors, with incorporation or reduction of molecular oxygen, 2-oxoglutarate as one donor, and incorporation of one atom each of oxygen into both donors;GO:0008270:zinc ion binding;
ENSDARG00000004633	1694	2	0.08	4	0.17	2	0.07	3	0.1	1	57331813	57340192	+	epn3b	epsin 3b [Source:ZFIN%3BAcc:ZDB-GENE-121214-173]	-	-	-
ENSDARG00000004634	2537	539	14.7	477	13.5	530	13.02	700	15.35	1	52662203	52699063	+	osbp	oxysterol binding protein [Source:ZFIN%3BAcc:ZDB-GENE-090312-18]	GO:0006869:lipid transport;	-	GO:0005543:phospholipid binding;
ENSDARG00000004635	7150	784	7.59	750	7.53	808	7.04	898	6.99	20	24817118	24963092	-	epha7	eph receptor A7 [Source:ZFIN%3BAcc:ZDB-GENE-030131-3745]	-	-	-
ENSDARG00000004636	4278	598	9.67	599	10.06	728	10.61	940	12.22	15	26903267	26931541	-	ccdc9	coiled-coil domain containing 9 [Source:ZFIN%3BAcc:ZDB-GENE-060929-520]	-	-	-
ENSDARG00000004643	4850	99	1.41	77	1.14	80	1.03	121	1.39	13	29480010	29505946	-	cdhr1a	cadherin-related family member 1a [Source:NCBI gene%3BAcc:449008]	-	-	-
ENSDARG00000004647	2498	133	3.68	104	2.99	126	3.14	134	2.98	24	21330753	21343982	-	spice1	spindle and centriole associated protein 1 [Source:ZFIN%3BAcc:ZDB-GENE-041212-64]	-	-	-
ENSDARG00000004648	918	3	0.23	6	0.47	7	0.48	16	0.97	14	23811808	23812725	+	kctd16a	potassium channel tetramerization domain containing 16a [Source:ZFIN%3BAcc:ZDB-GENE-060117-1]	GO:0051260:protein homooligomerization;	-	-
ENSDARG00000004658	2135	704	22.81	662	22.27	667	19.47	732	19.07	7	7378920	7398350	-	zgc:101810	zgc:101810 [Source:ZFIN%3BAcc:ZDB-GENE-041121-7]	-	-	-
ENSDARG00000004672	8799	864	6.79	815	6.65	865	6.13	1132	7.16	16	30735426	30870170	-	ptk2ab	protein tyrosine kinase 2ab [Source:ZFIN%3BAcc:ZDB-GENE-020114-1]	GO:0016310:phosphorylation;GO:0006468:protein phosphorylation;GO:0007172:signal complex assembly;	GO:0005856:cytoskeleton;GO:0005925:focal adhesion;	GO:0004672:protein kinase activity;GO:0000166:nucleotide binding;GO:0004871:signal transducer activity;GO:0004713:protein tyrosine kinase activity;GO:0005524:ATP binding;
ENSDARG00000004680	1533	737	33.26	631	29.57	803	32.65	912	33.09	2	30103131	30116467	+	dnajb6a	DnaJ heat shock protein family (Hsp40) member B6a [Source:ZFIN%3BAcc:ZDB-GENE-040718-45]	-	-	-
ENSDARG00000004687	1781	185	7.19	202	8.15	240	8.4	242	7.56	24	20325312	20332460	+	acaa1	acetyl-CoA acyltransferase 1 [Source:ZFIN%3BAcc:ZDB-GENE-040704-48]	GO:0008152:metabolic process;	-	GO:0003985:acetyl-CoA C-acetyltransferase activity;
ENSDARG00000004692	2323	537	15.99	498	15.4	629	16.88	654	15.66	9	24214660	24218367	-	nabp1a	nucleic acid binding protein 1a [Source:NCBI gene%3BAcc:494100]	GO:0000075:cell cycle checkpoint;GO:0000724:double-strand break repair via homologous recombination;GO:0010212:response to ionizing radiation;	GO:0070876:SOSS complex;	GO:0003697:single-stranded DNA binding;
ENSDARG00000004695	2363	388	11.36	304	9.24	385	10.16	448	10.55	13	31636732	31647323	-	six4a	SIX homeobox 4a [Source:ZFIN%3BAcc:ZDB-GENE-010201-2]	GO:0006355:regulation of transcription, DNA-templated;	GO:0005634:nucleus;	GO:0003700:sequence-specific DNA binding transcription factor activity;GO:0043565:sequence-specific DNA binding;
ENSDARG00000004696	2093	171	5.65	195	6.69	205	6.11	261	6.94	6	40822587	40832245	-	eefsec	eukaryotic elongation factor%2C selenocysteine-tRNA-specific [Source:ZFIN%3BAcc:ZDB-GENE-051120-72]	GO:0006414:translational elongation;	-	GO:0003746:translation elongation factor activity;GO:0005525:GTP binding;GO:0003924:GTPase activity;
ENSDARG00000004697	2729	72	1.83	51	1.34	103	2.35	82	1.67	20	33875256	33920055	+	rxrgb	retinoid X receptor%2C gamma b [Source:NCBI gene%3BAcc:436617]	GO:0043401:steroid hormone mediated signaling pathway;GO:0006355:regulation of transcription, DNA-templated;	GO:0005634:nucleus;	GO:0008270:zinc ion binding;GO:0043565:sequence-specific DNA binding;GO:0003700:sequence-specific DNA binding transcription factor activity;GO:0003707:steroid hormone receptor activity;
ENSDARG00000004702	1001	412	28.47	369	26.48	556	34.62	598	33.23	13	49443226	49444636	-	irf2bp2a	interferon regulatory factor 2 binding protein 2a [Source:NCBI gene%3BAcc:335866]	GO:0006355:regulation of transcription, DNA-templated;	GO:0005634:nucleus;	GO:0046872:metal ion binding;
ENSDARG00000004706	1622	919	39.2	799	35.38	926	35.59	1004	34.43	13	45431660	45443008	+	syf2	SYF2 pre-mRNA-splicing factor [Source:NCBI gene%3BAcc:445043]	GO:0006397:mRNA processing;GO:0008380:RNA splicing;	GO:0005634:nucleus;	-
ENSDARG00000004712	6172	150	1.68	136	1.58	163	1.65	153	1.38	9	51427826	51436377	-	tbr1b	T-box brain transcription factor 1b [Source:ZFIN%3BAcc:ZDB-GENE-000323-1]	GO:0006355:regulation of transcription, DNA-templated;	GO:0005634:nucleus;	GO:0003700:sequence-specific DNA binding transcription factor activity;GO:0003677:DNA binding;
ENSDARG00000004713	872	1421	112.73	1491	122.82	1642	117.38	1668	106.4	7	57629370	57637779	-	mad2l1	MAD2 mitotic arrest deficient-like 1 (yeast) [Source:ZFIN%3BAcc:ZDB-GENE-030515-3]	GO:0007094:mitotic spindle assembly checkpoint;	-	-
ENSDARG00000004714	6495	1611	17.16	1486	16.43	1554	14.91	1844	15.79	7	52516706	52709935	-	tcf12	transcription factor 12 [Source:ZFIN%3BAcc:ZDB-GENE-040516-11]	-	-	GO:0046983:protein dimerization activity;
ENSDARG00000004721	2097	8	0.26	5	0.17	8	0.24	13	0.34	20	51006362	51081372	+	mpp5b	membrane protein%2C palmitoylated 5b (MAGUK p55 subfamily member 5) [Source:ZFIN%3BAcc:ZDB-GENE-060531-2]	-	-	-
ENSDARG00000004724	2108	265	8.7	237	8.08	233	6.89	310	8.18	16	34111919	34135244	+	tcea3	transcription elongation factor A (SII)%2C 3 [Source:ZFIN%3BAcc:ZDB-GENE-040426-1860]	GO:0006355:regulation of transcription, DNA-templated;	-	GO:0003676:nucleic acid binding;
ENSDARG00000004726	3843	1201	21.62	1064	19.89	1268	20.57	1502	21.74	14	7320948	7375049	-	trappc11	trafficking protein particle complex 11 [Source:NCBI gene%3BAcc:323003]	-	-	-
ENSDARG00000004735	4447	7894	122.8	7938	128.21	9376	131.42	10541	131.84	20	35058634	35070476	+	hnrnpub	heterogeneous nuclear ribonucleoprotein Ub [Source:ZFIN%3BAcc:ZDB-GENE-030131-6422]	-	GO:0030529:ribonucleoprotein complex;GO:0005634:nucleus;	GO:0003676:nucleic acid binding;
ENSDARG00000004745	2673	392	10.15	355	9.54	456	10.63	421	8.76	23	27703749	27727512	+	lmbr1l	limb development membrane protein 1-like [Source:NCBI gene%3BAcc:321314]	GO:0006897:endocytosis;	GO:0005886:plasma membrane;GO:0016021:integral component of membrane;	-
ENSDARG00000004748	4748	639	9.31	655	9.91	679	8.91	587	6.88	3	39472342	39488639	-	zgc:100868	zgc:100868 [Source:ZFIN%3BAcc:ZDB-GENE-040801-33]	-	-	GO:0008236:serine-type peptidase activity;
ENSDARG00000004753	3594	23	0.44	20	0.4	22	0.38	33	0.51	6	13458257	13498745	-	mylkb	myosin light chain kinase b [Source:ZFIN%3BAcc:ZDB-GENE-041111-150]	-	-	-
ENSDARG00000004754	3219	1715	36.86	1662	37.09	2017	39.06	2332	40.3	21	43137500	43171249	-	hspa4a	heat shock protein 4a [Source:ZFIN%3BAcc:ZDB-GENE-040426-2832]	GO:0006950:response to stress;	-	GO:0005524:ATP binding;
ENSDARG00000004757	2192	25408	801.88	25278	828.31	28909	822.08	35271	895	8	47143829	47152086	-	ybx1	Y box binding protein 1 [Source:ZFIN%3BAcc:ZDB-GENE-000629-3]	-	-	-
ENSDARG00000004763	1765	45	1.76	29	1.18	36	1.27	43	1.36	10	35439952	35452191	+	hhla2a.2	HERV-H LTR-associating 2a%2C tandem duplicate 2 [Source:ZFIN%3BAcc:ZDB-GENE-091204-324]	-	-	-
ENSDARG00000004771	2190	229	7.23	188	6.17	224	6.38	266	6.76	9	8929764	8967936	+	ankrd10b	ankyrin repeat domain 10b [Source:ZFIN%3BAcc:ZDB-GENE-061013-49]	-	-	-
ENSDARG00000004774	2917	1278	30.31	1276	31.42	1444	30.86	1556	29.67	5	55866769	55914268	-	wdr36	WD repeat domain 36 [Source:ZFIN%3BAcc:ZDB-GENE-030131-464]	-	-	-
ENSDARG00000004782	8112	1861	15.87	1692	14.98	2348	18.04	2695	18.48	13	13213567	13294872	-	fgfr3	fibroblast growth factor receptor 3 [Source:NCBI gene%3BAcc:58129]	-	-	-
ENSDARG00000004785	2009	1685	58.02	1598	57.13	2024	62.8	2562	70.93	25	32366071	32381663	-	cops2	COP9 signalosome subunit 2 [Source:NCBI gene%3BAcc:415145]	-	GO:0005737:cytoplasm;GO:0008180:COP9 signalosome;	-
ENSDARG00000004789	10386	0	0	3	0.02	0	0	9	0.05	22	14445713	14739491	-	lrp1ba	low density lipoprotein receptor-related protein 1Ba [Source:ZFIN%3BAcc:ZDB-GENE-050208-608]	-	-	-
ENSDARG00000004794	3370	127	2.61	85	1.81	121	2.24	132	2.18	4	20177526	20199224	+	ccdc146	coiled-coil domain containing 146 [Source:ZFIN%3BAcc:ZDB-GENE-041210-217]	-	-	-
ENSDARG00000004796	6604	188	1.97	179	1.95	221	2.09	211	1.78	3	54849083	54875874	+	mgrn1b	mahogunin%2C ring finger 1b [Source:ZFIN%3BAcc:ZDB-GENE-110401-3]	-	-	GO:0008270:zinc ion binding;
ENSDARG00000004806	1646	847	35.6	879	38.36	1024	38.78	1193	40.31	16	13860299	13870899	+	grwd1	glutamate-rich WD repeat containing 1 [Source:ZFIN%3BAcc:ZDB-GENE-030131-9844]	-	-	-
ENSDARG00000004823	1725	7	0.28	7	0.29	11	0.4	12	0.39	18	20642378	20674121	-	asz1	ankyrin repeat%2C SAM and basic leucine zipper domain containing 1 [Source:ZFIN%3BAcc:ZDB-GENE-040426-988]	-	-	-
ENSDARG00000004830	2472	4739	132.62	4301	124.97	5170	130.37	6122	137.75	5	42835082	42872712	-	flot2a	flotillin 2a [Source:NCBI gene%3BAcc:245698]	-	-	-
ENSDARG00000004836	5521	385	4.82	403	5.24	463	5.23	416	4.19	23	17472702	17509656	-	dnajc5ab	DnaJ (Hsp40) homolog%2C subfamily C%2C member 5ab [Source:ZFIN%3BAcc:ZDB-GENE-081021-2]	-	-	-
ENSDARG00000004840	2448	316	8.93	349	10.24	336	8.56	475	10.79	22	10645088	10658520	+	rassf1	Ras association domain family member 1 [Source:ZFIN%3BAcc:ZDB-GENE-040912-14]	GO:0035556:intracellular signal transduction;	-	GO:0046872:metal ion binding;
ENSDARG00000004843	6663	928	9.64	918	9.9	986	9.22	1093	9.12	23	10634837	10723009	-	foxp1a	forkhead box P1a [Source:ZFIN%3BAcc:ZDB-GENE-060929-624]	-	-	GO:0003677:DNA binding;
ENSDARG00000004851	5192	142	1.89	134	1.85	126	1.51	198	2.12	5	30596477	30608624	+	hinfp	histone H4 transcription factor [Source:ZFIN%3BAcc:ZDB-GENE-040426-2764]	-	GO:0005622:intracellular;	GO:0008270:zinc ion binding;GO:0003676:nucleic acid binding;
ENSDARG00000004861	1991	88	3.06	71	2.56	122	3.82	125	3.49	17	29797876	29902187	-	esrrga	estrogen-related receptor gamma a [Source:ZFIN%3BAcc:ZDB-GENE-030821-2]	GO:0043401:steroid hormone mediated signaling pathway;GO:0006355:regulation of transcription, DNA-templated;	GO:0005634:nucleus;	GO:0008270:zinc ion binding;GO:0005496:steroid binding;GO:0043565:sequence-specific DNA binding;GO:0003700:sequence-specific DNA binding transcription factor activity;GO:0003707:steroid hormone receptor activity;
ENSDARG00000004864	1219	0	0	0	0	0	0	0	0	5	58679071	58684455	+	foxr1	forkhead box R1 [Source:ZFIN%3BAcc:ZDB-GENE-070928-26]	GO:0006355:regulation of transcription, DNA-templated;	-	GO:0003700:sequence-specific DNA binding transcription factor activity;GO:0043565:sequence-specific DNA binding;
ENSDARG00000004866	2628	424	11.16	390	10.66	467	11.08	492	10.41	19	7453996	7478597	+	mindy1	MINDY lysine 48 deubiquitinase 1 [Source:NCBI gene%3BAcc:563470]	-	-	-
ENSDARG00000004869	1436	10	0.48	12	0.6	12	0.52	34	1.32	2	11508691	11512819	-	penka	proenkephalin a [Source:ZFIN%3BAcc:ZDB-GENE-030729-31]	GO:0007218:neuropeptide signaling pathway;	-	-
ENSDARG00000004870	3182	1161	25.24	1030	23.25	1265	24.78	1242	21.71	17	51206225	51224800	-	psen1	presenilin 1 [Source:NCBI gene%3BAcc:30221]	GO:0060070:canonical Wnt signaling pathway;GO:0034205:beta-amyloid formation;GO:0007219:Notch signaling pathway;GO:0043085:positive regulation of catalytic activity;GO:0061053:somite development;GO:0051563:smooth endoplasmic reticulum calcium ion homeostasis;GO:0006816:calcium ion transport;GO:0006509:membrane protein ectodomain proteolysis;GO:0030318:melanocyte differentiation;GO:0001946:lymphan…	GO:0045121:membrane raft;GO:0043198:dendritic shaft;GO:0000139:Golgi membrane;GO:0031594:neuromuscular junction;GO:0030426:growth cone;GO:0035253:ciliary rootlet;GO:0005743:mitochondrial inner membrane;GO:0005789:endoplasmic reticulum membrane;GO:0005765:lysosomal membrane;GO:0009986:cell surface;GO:0043025:neuronal cell body;GO:0030424:axon;GO:0030018:Z disc;GO:0048471:perinuclear region of cyto…	GO:0045296:cadherin binding;GO:0004190:aspartic-type endopeptidase activity;GO:0010309:acireductone dioxygenase [iron(II)-requiring] activity;GO:0046872:metal ion binding;
ENSDARG00000004871	4221	3	0.05	4	0.07	1	0.01	3	0.04	11	35196587	35238756	+	mst1rb	macrophage stimulating 1 receptor b [Source:ZFIN%3BAcc:ZDB-GENE-071218-3]	-	-	-
ENSDARG00000004874	2543	44	1.2	52	1.47	43	1.05	43	0.94	7	69478914	69494504	+	spata6l	spermatogenesis associated 6-like [Source:ZFIN%3BAcc:ZDB-GENE-040426-1369]	-	-	-
ENSDARG00000004875	2661	297	7.72	296	7.99	285	6.68	367	7.67	11	45219558	45244641	+	tmc6b	transmembrane channel-like 6b [Source:ZFIN%3BAcc:ZDB-GENE-040718-460]	-	GO:0016021:integral component of membrane;	-
ENSDARG00000004877	5319	640	8.32	577	7.79	747	8.75	862	9.01	20	33601046	33705044	-	rock2b	rho-associated%2C coiled-coil containing protein kinase 2b [Source:ZFIN%3BAcc:ZDB-GENE-060125-2]	GO:0006468:protein phosphorylation;GO:0035556:intracellular signal transduction;GO:0060287:epithelial cilium movement involved in determination of left/right asymmetry;GO:0070121:Kupffer's vesicle development;	-	GO:0004674:protein serine/threonine kinase activity;GO:0046872:metal ion binding;GO:0005543:phospholipid binding;GO:0005524:ATP binding;GO:0017048:Rho GTPase binding;
ENSDARG00000004880	3790	111	2.03	135	2.56	110	1.81	104	1.53	2	44725550	44746723	-	acsm3	acyl-CoA synthetase medium chain family member 3 [Source:ZFIN%3BAcc:ZDB-GENE-080220-22]	-	-	-
ENSDARG00000004889	1286	210	11.3	209	11.67	266	12.89	287	12.41	14	36428441	36437249	-	aga	aspartylglucosaminidase [Source:ZFIN%3BAcc:ZDB-GENE-040426-2311]	-	-	GO:0016787:hydrolase activity;
ENSDARG00000004891	2212	593	18.55	583	18.93	691	19.47	694	17.45	2	37134281	37146572	+	pex19	peroxisomal biogenesis factor 19 [Source:ZFIN%3BAcc:ZDB-GENE-050417-424]	-	GO:0005777:peroxisome;	-
ENSDARG00000004898	1259	1	0.05	10	0.57	3	0.15	4	0.18	6	9945303	9952103	-	zp2l2	zona pellucida glycoprotein 2%2C like 2 [Source:ZFIN%3BAcc:ZDB-GENE-060818-4]	-	-	-
ENSDARG00000004904	2593	114	3.04	117	3.24	138	3.32	243	5.21	4	16783972	16824556	-	gys2	glycogen synthase 2 [Source:ZFIN%3BAcc:ZDB-GENE-030826-31]	GO:0009749:response to glucose;GO:0005978:glycogen biosynthetic process;	GO:0005829:cytosol;GO:0030864:cortical actin cytoskeleton;GO:0043265:ectoplasm;	GO:0004373:glycogen (starch) synthase activity;
ENSDARG00000004906	3145	2656	58.42	2618	59.79	2911	57.7	3756	66.43	5	66807179	66823794	-	stip1	stress-induced phosphoprotein 1 [Source:ZFIN%3BAcc:ZDB-GENE-041121-17]	-	-	-
ENSDARG00000004925	2619	57	1.51	51	1.4	57	1.36	46	0.98	25	21296588	21507676	-	immp2l	inner mitochondrial membrane peptidase subunit 2 [Source:NCBI gene%3BAcc:445299]	GO:0006627:protein processing involved in protein targeting to mitochondrion;GO:0006508:proteolysis;	GO:0016021:integral component of membrane;GO:0042720:mitochondrial inner membrane peptidase complex;	GO:0008236:serine-type peptidase activity;
ENSDARG00000004930	7151	925	8.95	875	8.79	1113	9.7	1265	9.84	9	21893757	21970067	-	lmo7a	LIM domain 7a [Source:ZFIN%3BAcc:ZDB-GENE-030219-74]	-	-	GO:0008270:zinc ion binding;
ENSDARG00000004931	2960	135	3.16	140	3.4	140	2.95	201	3.78	13	36196778	36264861	-	slc8a3	solute carrier family 8 member 3 [Source:ZFIN%3BAcc:ZDB-GENE-050810-1]	GO:0006816:calcium ion transport;GO:0055085:transmembrane transport;GO:0007154:cell communication;	GO:0016021:integral component of membrane;	GO:0005432:calcium:sodium antiporter activity;
ENSDARG00000004932	4367	140	2.22	125	2.06	201	2.87	160	2.04	22	38824012	38913871	+	anos1b	anosmin 1b [Source:ZFIN%3BAcc:ZDB-GENE-000201-13]	-	GO:0005576:extracellular region;	GO:0030414:peptidase inhibitor activity;
ENSDARG00000004937	2345	834	24.6	860	26.34	1043	27.72	1074	25.47	21	22347120	22359336	-	skp2	S-phase kinase-associated protein 2%2C E3 ubiquitin protein ligase [Source:ZFIN%3BAcc:ZDB-GENE-030219-158]	-	-	-
ENSDARG00000004939	2226	651	20.23	572	18.46	730	20.44	833	20.81	16	41717313	41732459	+	mtdhb	metadherin b [Source:ZFIN%3BAcc:ZDB-GENE-090929-2]	-	-	-
ENSDARG00000004948	4209	1531	25.16	1387	23.67	1591	23.56	1693	22.37	12	45186533	45197038	-	bccip	BRCA2 and CDKN1A interacting protein [Source:NCBI gene%3BAcc:541348]	GO:0007049:cell cycle;GO:0006281:DNA repair;	GO:0005634:nucleus;	-
ENSDARG00000004952	1623	0	0	1	0.04	2	0.08	4	0.14	17	35357451	35361322	-	rsad2	radical S-adenosyl methionine domain containing 2 [Source:NCBI gene%3BAcc:570456]	GO:0051607:defense response to virus;GO:0045087:innate immune response;	GO:0005789:endoplasmic reticulum membrane;GO:0005811:lipid particle;	GO:0046872:metal ion binding;GO:0051539:4 iron, 4 sulfur cluster binding;GO:0003824:catalytic activity;
ENSDARG00000004953	2291	1	0.03	4	0.13	4	0.11	0	0	1	7574351	7603734	-	mxb	myxovirus (influenza) resistance B [Source:NCBI gene%3BAcc:360143]	GO:0046685:response to arsenic-containing substance;GO:0009615:response to virus;	GO:0005737:cytoplasm;	GO:0005525:GTP binding;GO:0003924:GTPase activity;
ENSDARG00000004954	4227	16	0.26	12	0.2	14	0.21	14	0.18	3	29914427	29941357	-	grna	granulin a [Source:ZFIN%3BAcc:ZDB-GENE-030131-8434]	-	-	-
ENSDARG00000004956	1196	1340	77.51	1300	78.07	1426	74.32	1465	68.13	21	30293564	30300049	+	zmat2	zinc finger%2C matrin-type 2 [Source:ZFIN%3BAcc:ZDB-GENE-030131-3197]	-	GO:0005622:intracellular;	GO:0008270:zinc ion binding;GO:0003676:nucleic acid binding;
ENSDARG00000004964	2381	665	19.32	705	21.27	837	21.91	879	20.53	16	4615661	4640578	-	cyp4t8	cytochrome P450%2C family 4%2C subfamily T%2C polypeptide 8 [Source:ZFIN%3BAcc:ZDB-GENE-031219-3]	GO:0055114:oxidation-reduction process;	-	GO:0020037:heme binding;GO:0016705:oxidoreductase activity, acting on paired donors, with incorporation or reduction of molecular oxygen;GO:0004497:monooxygenase activity;GO:0005506:iron ion binding;GO:0009055:electron carrier activity;
ENSDARG00000004979	2696	556	14.27	487	12.97	626	14.47	660	13.62	13	2394264	2417409	+	elovl5	ELOVL fatty acid elongase 5 [Source:ZFIN%3BAcc:ZDB-GENE-040407-2]	GO:0019368:fatty acid elongation, unsaturated fatty acid;GO:0042759:long-chain fatty acid biosynthetic process;GO:0042761:very long-chain fatty acid biosynthetic process;	GO:0005887:integral component of plasma membrane;	GO:0009922:fatty acid elongase activity;
ENSDARG00000004988	3509	103	2.03	104	2.13	128	2.27	158	2.5	21	28958471	29075815	+	ppp3ca	protein phosphatase 3%2C catalytic subunit%2C alpha isozyme [Source:ZFIN%3BAcc:ZDB-GENE-091113-24]	-	-	GO:0004721:phosphoprotein phosphatase activity;
ENSDARG00000005002	4529	208	3.18	199	3.16	207	2.85	252	3.09	20	20901791	21018334	+	brf1b	BRF1 RNA polymerase III transcription initiation factor subunit b [Source:ZFIN%3BAcc:ZDB-GENE-030131-6248]	GO:0006352:DNA-templated transcription, initiation;GO:0045893:positive regulation of transcription, DNA-templated;	GO:0005634:nucleus;	GO:0017025:TBP-class protein binding;GO:0008270:zinc ion binding;
ENSDARG00000005004	2363	11	0.32	3	0.09	1	0.03	7	0.16	25	35474987	35524166	-	slc5a12	solute carrier family 5 member 12 [Source:NCBI gene%3BAcc:393339]	GO:0006814:sodium ion transport;GO:0055085:transmembrane transport;	GO:0016021:integral component of membrane;	GO:0015355:secondary active monocarboxylate transmembrane transporter activity;GO:0015293:symporter activity;
ENSDARG00000005010	808	51	4.37	66	5.87	77	5.94	101	6.95	13	44818447	44819254	-	si:dkeyp-2e4.8	si:dkeyp-2e4.8 [Source:ZFIN%3BAcc:ZDB-GENE-061207-81]	-	-	-
ENSDARG00000005015	3406	946	19.21	978	20.62	1165	21.32	1368	22.34	8	25708067	25716074	-	tspy	testis specific protein Y-linked [Source:ZFIN%3BAcc:ZDB-GENE-030131-9158]	GO:0006334:nucleosome assembly;	GO:0005634:nucleus;	-
ENSDARG00000005023	2235	4475	138.51	4902	157.54	5309	148.07	6040	150.32	19	42591150	42607451	-	fkbp9	FKBP prolyl isomerase 9 [Source:ZFIN%3BAcc:ZDB-GENE-040801-23]	GO:0006457:protein folding;GO:0000413:protein peptidyl-prolyl isomerization;	GO:0016020:membrane;	GO:0003755:peptidyl-prolyl cis-trans isomerase activity;GO:0005509:calcium ion binding;GO:0005528:FK506 binding;
ENSDARG00000005026	12103	619	3.54	579	3.44	1089	5.61	1328	6.1	19	21266008	21416407	+	tshz1	teashirt zinc finger homeobox 1 [Source:NCBI gene%3BAcc:369196]	GO:0006355:regulation of transcription, DNA-templated;GO:0007275:multicellular organismal development;	GO:0005634:nucleus;	GO:0008270:zinc ion binding;GO:0043565:sequence-specific DNA binding;GO:0003700:sequence-specific DNA binding transcription factor activity;
ENSDARG00000005034	2056	201	6.76	180	6.29	156	4.73	190	5.14	15	34495056	34568705	-	crppa	CDP-L-ribitol pyrophosphorylase A [Source:NCBI gene%3BAcc:798716]	GO:0035269:protein O-linked mannosylation;GO:0060049:regulation of protein glycosylation;GO:0048854:brain morphogenesis;GO:0048747:muscle fiber development;GO:0008299:isoprenoid biosynthetic process;	-	GO:0016779:nucleotidyltransferase activity;
ENSDARG00000005049	1412	35	1.71	59	3	74	3.27	88	3.47	9	8887528	8895243	-	rab20	RAB20%2C member RAS oncogene family [Source:ZFIN%3BAcc:ZDB-GENE-030131-9143]	GO:0007264:small GTPase mediated signal transduction;	-	GO:0005525:GTP binding;
ENSDARG00000005050	1771	12	0.47	4	0.16	4	0.14	7	0.22	6	48253449	48271687	+	wnt2ba	wingless-type MMTV integration site family%2C member 2Ba [Source:ZFIN%3BAcc:ZDB-GENE-030717-2]	-	-	-
ENSDARG00000005057	2287	503	15.22	483	15.17	502	13.68	527	12.82	8	17184602	17193041	+	dimt1l	DIM1 dimethyladenosine transferase 1-like (S. cerevisiae) [Source:ZFIN%3BAcc:ZDB-GENE-040801-75]	GO:0000154:rRNA modification;	-	GO:0000179:rRNA (adenine-N6,N6-)-dimethyltransferase activity;
ENSDARG00000005058	5618	2880	35.46	2754	35.21	3318	36.81	3904	38.65	2	44749201	44777679	-	ncapd2	non-SMC condensin I complex%2C subunit D2 [Source:ZFIN%3BAcc:ZDB-GENE-050506-59]	GO:0007076:mitotic chromosome condensation;	GO:0005634:nucleus;	-
ENSDARG00000005078	2937	547	12.88	500	12.23	613	13.01	599	11.34	23	10724042	10745319	-	eif4e3	eukaryotic translation initiation factor 4E family member 3 [Source:NCBI gene%3BAcc:447850]	GO:0006413:translational initiation;GO:0006417:regulation of translation;	GO:0005737:cytoplasm;GO:0005845:mRNA cap binding complex;	GO:0003743:translation initiation factor activity;
ENSDARG00000005085	2050	284	9.58	336	11.77	157	4.77	214	5.81	16	53685812	53709101	+	ggctb	gamma-glutamylcyclotransferase b [Source:ZFIN%3BAcc:ZDB-GENE-040426-1939]	-	-	-
ENSDARG00000005092	3799	162	2.95	173	3.27	163	2.67	194	2.84	7	38395197	38500305	+	cep89	centrosomal protein 89 [Source:NCBI gene%3BAcc:393852]	-	GO:0005737:cytoplasm;GO:0005813:centrosome;GO:0000922:spindle pole;	-
ENSDARG00000005095	2660	27	0.7	35	0.95	21	0.49	39	0.82	25	7918695	7925269	-	glcea	glucuronic acid epimerase a [Source:ZFIN%3BAcc:ZDB-GENE-040630-9]	GO:0009950:dorsal/ventral axis specification;GO:0030201:heparan sulfate proteoglycan metabolic process;GO:0006024:glycosaminoglycan biosynthetic process;	GO:0016021:integral component of membrane;	GO:0047464:heparosan-N-sulfate-glucuronate 5-epimerase activity;
ENSDARG00000005098	3305	834	17.46	794	17.26	963	18.16	1196	20.13	21	20309085	20322816	-	zgc:86764	zgc:86764 [Source:ZFIN%3BAcc:ZDB-GENE-040718-435]	GO:0000226:microtubule cytoskeleton organization;GO:0000910:cytokinesis;	-	GO:0008017:microtubule binding;
ENSDARG00000005104	3796	367	6.69	384	7.27	372	6.11	416	6.1	5	20823409	20863374	+	limk2	LIM domain kinase 2 [Source:ZFIN%3BAcc:ZDB-GENE-040718-398]	GO:0006468:protein phosphorylation;	-	GO:0004672:protein kinase activity;GO:0005524:ATP binding;GO:0008270:zinc ion binding;
ENSDARG00000005108	3018	669	15.34	711	16.92	629	12.99	653	12.03	10	2924775	2943474	-	oclna	occludin a [Source:ZFIN%3BAcc:ZDB-GENE-040426-2685]	-	GO:0005923:bicellular tight junction;GO:0016021:integral component of membrane;	GO:0005198:structural molecule activity;
ENSDARG00000005112	3663	1101	20.79	999	19.59	1601	27.24	1727	26.22	16	26774182	26802798	+	cdh17	cadherin 17%2C LI cadherin (liver-intestine) [Source:ZFIN%3BAcc:ZDB-GENE-030910-3]	GO:0007156:homophilic cell adhesion via plasma membrane adhesion molecules;GO:0048793:pronephros development;	GO:0005886:plasma membrane;GO:0016021:integral component of membrane;	GO:0005509:calcium ion binding;
ENSDARG00000005115	3325	880	18.31	783	16.91	959	17.98	1175	19.66	18	7015283	7032227	-	calub	calumenin b [Source:NCBI gene%3BAcc:394057]	-	-	-
ENSDARG00000005122	5931	3396	39.61	3279	39.71	4009	42.13	4674	43.83	21	17051478	17108649	+	atp2a2b	ATPase sarcoplasmic/endoplasmic reticulum Ca2+ transporting 2b [Source:ZFIN%3BAcc:ZDB-GENE-030131-867]	GO:0006816:calcium ion transport;	GO:0016021:integral component of membrane;	GO:0046872:metal ion binding;GO:0005524:ATP binding;GO:0005388:calcium-transporting ATPase activity;
ENSDARG00000005126	3149	201	4.42	160	3.65	229	4.53	248	4.38	4	75013307	75057322	-	large1	LARGE xylosyl- and glucuronyltransferase 1 [Source:NCBI gene%3BAcc:446213]	-	GO:0000139:Golgi membrane;GO:0016021:integral component of membrane;	GO:0016757:transferase activity, transferring glycosyl groups;
ENSDARG00000005128	1122	1015	62.58	878	56.21	1008	56	1010	50.07	9	29671553	29679172	+	rnaseh2b	ribonuclease H2%2C subunit B [Source:ZFIN%3BAcc:ZDB-GENE-040426-1090]	-	GO:0005634:nucleus;	-
ENSDARG00000005134	5914	1358	15.89	1378	16.74	1509	15.9	1786	16.8	12	28346722	28363166	-	psmd11b	proteasome 26S subunit%2C non-ATPase 11b [Source:NCBI gene%3BAcc:322265]	GO:0048863:stem cell differentiation;GO:0043248:proteasome assembly;GO:0006511:ubiquitin-dependent protein catabolic process;	GO:0022624:proteasome accessory complex;GO:0005634:nucleus;GO:0005829:cytosol;	-
ENSDARG00000005139	2949	123	2.89	124	3.02	178	3.76	203	3.83	24	20559009	20572170	+	hhatlb	hedgehog acyltransferase like%2C b [Source:ZFIN%3BAcc:ZDB-GENE-050506-130]	-	GO:0016021:integral component of membrane;	-
ENSDARG00000005141	5850	16	0.19	13	0.16	30	0.32	28	0.27	11	35364445	35441348	+	camkvb	CaM kinase-like vesicle-associated b [Source:NCBI gene%3BAcc:393422]	GO:0006468:protein phosphorylation;	GO:0030659:cytoplasmic vesicle membrane;	GO:0004672:protein kinase activity;GO:0005524:ATP binding;GO:0005516:calmodulin binding;
ENSDARG00000005150	2126	128	4.17	102	3.45	97	2.84	142	3.72	16	42509011	42523744	-	tbx20	T-box transcription factor 20 [Source:NCBI gene%3BAcc:57936]	GO:0035844:cloaca development;GO:0001570:vasculogenesis;GO:0001947:heart looping;GO:0035162:embryonic hemopoiesis;GO:0045892:negative regulation of transcription, DNA-templated;	GO:0005634:nucleus;	GO:0003677:DNA binding;GO:0003700:sequence-specific DNA binding transcription factor activity;
ENSDARG00000005154	1269	31	1.69	44	2.49	52	2.55	59	2.59	5	62340799	62356975	+	aspa	aspartoacylase [Source:NCBI gene%3BAcc:557232]	GO:0008152:metabolic process;	GO:0005737:cytoplasm;GO:0005634:nucleus;	GO:0016788:hydrolase activity, acting on ester bonds;GO:0046872:metal ion binding;GO:0019807:aspartoacylase activity;
ENSDARG00000005159	2531	61	1.67	88	2.5	87	2.14	91	2	3	56408840	56541751	-	cyth1a	cytohesin 1a [Source:ZFIN%3BAcc:ZDB-GENE-030131-657]	-	-	-
ENSDARG00000005162	6957	9812	97.57	9260	95.61	10893	97.6	12999	103.93	19	10985369	11031394	-	tpm3	tropomyosin 3 [Source:ZFIN%3BAcc:ZDB-GENE-030826-16]	-	-	-
ENSDARG00000005163	4414	166	2.6	104	1.69	116	1.64	170	2.14	2	42871831	42936509	+	efr3a	EFR3 homolog A (S. cerevisiae) [Source:ZFIN%3BAcc:ZDB-GENE-040426-1681]	-	-	-
ENSDARG00000005172	807	214	18.35	239	21.27	224	17.3	182	12.54	21	39557433	39566854	-	dynll2b	dynein%2C light chain%2C LC8-type 2b [Source:ZFIN%3BAcc:ZDB-GENE-050320-132]	-	-	-
ENSDARG00000005176	1345	96	4.94	99	5.29	194	8.99	203	8.4	18	40479684	40481028	-	zgc:101040	zgc:101040 [Source:ZFIN%3BAcc:ZDB-GENE-040801-107]	GO:0008152:metabolic process;	-	GO:0016407:acetyltransferase activity;
ENSDARG00000005179	4025	46	0.79	31	0.55	18	0.28	30	0.41	17	38738840	38778901	-	dglucy	D-glutamate cyclase [Source:ZFIN%3BAcc:ZDB-GENE-070725-6]	-	-	-
ENSDARG00000005185	2250	43	1.32	47	1.5	42	1.16	44	1.09	12	31616412	31631297	+	cpn1	carboxypeptidase N%2C polypeptide 1 [Source:ZFIN%3BAcc:ZDB-GENE-030131-9116]	GO:0006508:proteolysis;GO:0042221:response to chemical;	GO:0005615:extracellular space;	GO:0004181:metallocarboxypeptidase activity;GO:0008270:zinc ion binding;
ENSDARG00000005186	5629	410	5.04	372	4.75	396	4.39	457	4.52	19	2364552	2563324	+	sp4	sp4 transcription factor [Source:ZFIN%3BAcc:ZDB-GENE-031202-3]	-	-	GO:0005488:binding;
ENSDARG00000005191	1922	6890	248	6551	244.82	7366	238.89	8001	231.55	6	49926115	49966288	+	ahcy	adenosylhomocysteinase [Source:ZFIN%3BAcc:ZDB-GENE-031219-6]	GO:0033353:S-adenosylmethionine cycle;GO:0006730:one-carbon metabolic process;	-	GO:0004013:adenosylhomocysteinase activity;GO:0000166:nucleotide binding;
ENSDARG00000005210	3836	556	10.03	540	10.11	640	10.4	717	10.4	1	26605065	26654311	+	coro2a	coronin%2C actin binding protein%2C 2A [Source:ZFIN%3BAcc:ZDB-GENE-030131-2258]	GO:0030036:actin cytoskeleton organization;	GO:0015629:actin cytoskeleton;	GO:0051015:actin filament binding;
ENSDARG00000005216	3421	452	9.14	390	8.19	348	6.34	524	8.52	15	35253247	35339302	+	zgc:158328	zgc:158328 [Source:ZFIN%3BAcc:ZDB-GENE-070112-1202]	-	-	GO:0005509:calcium ion binding;
ENSDARG00000005218	2302	59	1.77	45	1.4	71	1.92	88	2.13	2	374365	389867	-	wrnip1	WRN helicase interacting protein 1 [Source:ZFIN%3BAcc:ZDB-GENE-040426-2415]	-	-	GO:0017111:nucleoside-triphosphatase activity;GO:0005524:ATP binding;
ENSDARG00000005220	1278	129	6.98	161	9.05	180	8.78	203	8.84	24	12629649	12689571	-	pdcd6	programmed cell death 6 [Source:ZFIN%3BAcc:ZDB-GENE-040426-1307]	-	-	GO:0005509:calcium ion binding;
ENSDARG00000005221	2252	1	0.03	1	0.03	1	0.03	0	0	6	13871641	13891727	-	desmb	desmin b [Source:ZFIN%3BAcc:ZDB-GENE-061027-102]	-	GO:0005882:intermediate filament;	GO:0005198:structural molecule activity;
ENSDARG00000005230	1045	3061	202.64	3013	207.1	3482	207.7	3184	169.47	19	11231083	11238721	-	ssr2	signal sequence receptor%2C beta [Source:ZFIN%3BAcc:ZDB-GENE-010413-1]	-	GO:0016021:integral component of membrane;GO:0005783:endoplasmic reticulum;	-
ENSDARG00000005232	2367	308	9	347	10.53	401	10.56	564	13.25	17	17914369	18025691	+	ccdc85ca	coiled-coil domain containing 85C%2C a [Source:NCBI gene%3BAcc:751667]	GO:0007275:multicellular organismal development;	-	-
ENSDARG00000005236	14407	3870	18.58	3518	17.54	4218	18.25	5938	22.93	12	27061720	27092286	+	srcap	Snf2-related CREBBP activator protein [Source:ZFIN%3BAcc:ZDB-GENE-041008-127]	-	-	-
ENSDARG00000005246	1890	62	2.27	84	3.19	86	2.84	73	2.15	12	24060894	24077141	+	asb3	ankyrin repeat and SOCS box containing 3 [Source:ZFIN%3BAcc:ZDB-GENE-030131-6142]	GO:0035556:intracellular signal transduction;	-	-
ENSDARG00000005251	1834	975	36.78	958	37.52	963	32.73	979	29.69	9	24025444	24031461	-	rpe	ribulose-5-phosphate-3-epimerase [Source:ZFIN%3BAcc:ZDB-GENE-030131-6837]	GO:0006098:pentose-phosphate shunt;	-	GO:0004750:ribulose-phosphate 3-epimerase activity;GO:0046872:metal ion binding;
ENSDARG00000005254	2422	3068	87.63	3084	91.46	3717	95.66	4065	93.35	3	18376269	18384501	-	kdelr2a	KDEL endoplasmic reticulum protein retention receptor 2a [Source:NCBI gene%3BAcc:373129]	GO:0006621:protein retention in ER lumen;GO:0015031:protein transport;GO:0016192:vesicle-mediated transport;	GO:0016021:integral component of membrane;GO:0005783:endoplasmic reticulum;GO:0005789:endoplasmic reticulum membrane;	GO:0046923:ER retention sequence binding;
ENSDARG00000005271	1100	26	1.64	38	2.48	16	0.91	53	2.68	16	3982590	4001743	+	zc3h12a	zinc finger CCCH-type containing 12A [Source:ZFIN%3BAcc:ZDB-GENE-110411-6]	-	-	-
ENSDARG00000005274	2434	172	4.89	156	4.6	190	4.87	215	4.91	25	21098675	21115213	+	rad52	RAD52 homolog%2C DNA repair protein [Source:ZFIN%3BAcc:ZDB-GENE-050731-10]	GO:0006281:DNA repair;GO:0006310:DNA recombination;	-	-
ENSDARG00000005284	1903	31	1.13	43	1.62	42	1.38	23	0.67	12	45661810	45669050	-	fbxl15	F-box and leucine-rich repeat protein 15 [Source:NCBI gene%3BAcc:405878]	GO:0000086:G2/M transition of mitotic cell cycle;GO:0009953:dorsal/ventral pattern formation;GO:0030282:bone mineralization;GO:0016567:protein ubiquitination;GO:0030513:positive regulation of BMP signaling pathway;GO:0031146:SCF-dependent proteasomal ubiquitin-dependent protein catabolic process;	GO:0019005:SCF ubiquitin ligase complex;GO:0005737:cytoplasm;	GO:0004842:ubiquitin-protein transferase activity;
ENSDARG00000005314	1011	0	0	0	0	0	0	0	0	1	49501171	49505449	-	CALHM1	si:dkeyp-80c12.5 [Source:ZFIN%3BAcc:ZDB-GENE-090312-195]	-	-	-
ENSDARG00000005315	4055	3367	57.44	3294	58.35	3823	58.77	4115	56.45	7	38535934	38570940	-	celf1	cugbp%2C Elav-like family member 1 [Source:NCBI gene%3BAcc:58137]	-	-	-
ENSDARG00000005318	2962	605	14.13	609	14.77	692	14.56	767	14.4	9	38043337	38065147	+	stam2	signal transducing adaptor molecule (SH3 domain and ITAM motif) 2 [Source:ZFIN%3BAcc:ZDB-GENE-041114-64]	GO:0006886:intracellular protein transport;	-	-
ENSDARG00000005320	1472	248	11.66	249	12.15	416	17.62	439	16.59	5	12032802	12063381	-	nipsnap1	nipsnap homolog 1 (C. elegans) [Source:NCBI gene%3BAcc:30231]	-	-	-
ENSDARG00000005327	1847	6	0.22	2	0.08	2	0.07	4	0.12	2	37762924	37770331	+	ftr66	finTRIM family%2C member 66 [Source:ZFIN%3BAcc:ZDB-GENE-070912-661]	-	-	-
ENSDARG00000005332	1762	10	0.39	13	0.53	24	0.85	18	0.57	24	24086249	24101132	+	lipib	lipase%2C member Ib [Source:ZFIN%3BAcc:ZDB-GENE-091118-47]	-	-	-
ENSDARG00000005335	2055	5	0.17	2	0.07	0	0	1	0.03	21	45897814	45903536	+	slc22a4	solute carrier family 22 member 4 [Source:ZFIN%3BAcc:ZDB-GENE-040426-1517]	GO:0055085:transmembrane transport;	GO:0016021:integral component of membrane;	GO:0022857:transmembrane transporter activity;
ENSDARG00000005343	2875	31	0.75	29	0.72	26	0.56	25	0.48	6	6736925	6775821	-	ccdc85al	coiled-coil domain containing 85A%2C like [Source:ZFIN%3BAcc:ZDB-GENE-040912-92]	-	-	-
ENSDARG00000005350	6269	1415	15.61	1219	13.97	1531	15.22	1581	14.03	23	27358722	27442544	-	dip2ba	disco-interacting protein 2 homolog Ba [Source:NCBI gene%3BAcc:405899]	-	-	-
ENSDARG00000005355	2246	145	4.47	171	5.47	144	4	141	3.49	18	173603	194844	+	larp6a	La ribonucleoprotein 6%2C translational regulator a [Source:ZFIN%3BAcc:ZDB-GENE-030131-6403]	GO:0001756:somitogenesis;GO:0006396:RNA processing;	GO:0030529:ribonucleoprotein complex;GO:0005634:nucleus;	GO:0003723:RNA binding;GO:0000166:nucleotide binding;
ENSDARG00000005356	3493	166	3.29	171	3.52	199	3.55	225	3.58	17	10501647	10553538	+	tyro3	TYRO3 protein tyrosine kinase [Source:NCBI gene%3BAcc:30709]	GO:0007155:cell adhesion;GO:0006468:protein phosphorylation;	GO:0005886:plasma membrane;GO:0016021:integral component of membrane;	GO:0004714:transmembrane receptor protein tyrosine kinase activity;GO:0005524:ATP binding;
ENSDARG00000005359	2111	2148	70.39	2093	71.22	2433	71.84	2957	77.91	6	10037252	10056640	+	sucla2	succinate-CoA ligase%2C ADP-forming%2C beta subunit [Source:ZFIN%3BAcc:ZDB-GENE-040426-1963]	GO:0008152:metabolic process;	-	GO:0005524:ATP binding;GO:0016874:ligase activity;GO:0003824:catalytic activity;
ENSDARG00000005364	4090	35	0.59	20	0.35	16	0.24	26	0.35	2	26060528	26156784	+	grin3ba	glutamate receptor%2C ionotropic%2C N-methyl-D-aspartate 3Ba [Source:ZFIN%3BAcc:ZDB-GENE-070912-354]	-	-	-
ENSDARG00000005368	3597	693	13.33	711	14.2	844	14.63	929	14.37	15	23271862	23342752	-	mcamb	melanoma cell adhesion molecule b [Source:ZFIN%3BAcc:ZDB-GENE-030219-213]	GO:0001525:angiogenesis;	GO:0016021:integral component of membrane;	-
ENSDARG00000005371	2694	3	0.08	1	0.03	0	0	2	0.04	16	32152612	32159033	+	gprc6a	G protein-coupled receptor%2C class C%2C group 6%2C member A [Source:NCBI gene%3BAcc:494131]	GO:0006874:cellular calcium ion homeostasis;GO:0007186:G-protein coupled receptor signaling pathway;GO:0007608:sensory perception of smell;	GO:0005886:plasma membrane;GO:0016021:integral component of membrane;	GO:0004930:G-protein coupled receptor activity;GO:0016595:glutamate binding;
ENSDARG00000005372	2611	17	0.45	18	0.5	23	0.55	7	0.15	5	55763276	55848511	-	camk4	calcium/calmodulin-dependent protein kinase IV [Source:ZFIN%3BAcc:ZDB-GENE-050417-76]	GO:0006468:protein phosphorylation;	GO:0005634:nucleus;GO:0005829:cytosol;	GO:0005524:ATP binding;GO:0004674:protein serine/threonine kinase activity;
ENSDARG00000005374	5910	449	5.26	443	5.38	579	6.11	526	4.95	7	52929964	52950123	-	tubgcp4	tubulin%2C gamma complex associated protein 4 [Source:ZFIN%3BAcc:ZDB-GENE-081022-124]	-	-	-
ENSDARG00000005382	3133	326	7.2	338	7.75	379	7.54	458	8.13	12	9781524	9796237	-	prdm9	PR domain containing 9 [Source:NCBI gene%3BAcc:393876]	GO:0016568:chromatin modification;GO:0007126:meiotic nuclear division;GO:0006355:regulation of transcription, DNA-templated;GO:0032259:methylation;	GO:0005694:chromosome;GO:0005634:nucleus;	GO:0008270:zinc ion binding;GO:0018024:histone-lysine N-methyltransferase activity;GO:0003677:DNA binding;
ENSDARG00000005392	2029	3	0.1	6	0.21	4	0.12	3	0.08	8	13364950	13382351	+	slc5a5	solute carrier family 5 member 5 [Source:ZFIN%3BAcc:ZDB-GENE-060503-585]	GO:0055085:transmembrane transport;	GO:0016021:integral component of membrane;	GO:0005215:transporter activity;
ENSDARG00000005394	3186	186	4.04	125	2.82	340	6.65	526	9.18	20	46967269	47051996	-	dnmt3aa	DNA (cytosine-5-)-methyltransferase 3 alpha a [Source:ZFIN%3BAcc:ZDB-GENE-050314-5]	GO:0006306:DNA methylation;	-	GO:0003677:DNA binding;GO:0008168:methyltransferase activity;
ENSDARG00000005397	6149	353	3.97	290	3.39	379	3.84	393	3.55	10	26129830	26179805	-	trim3b	tripartite motif containing 3b [Source:ZFIN%3BAcc:ZDB-GENE-070112-1132]	-	GO:0005622:intracellular;	GO:0008270:zinc ion binding;
ENSDARG00000005414	1419	15	0.73	25	1.27	19	0.83	30	1.18	3	39630930	39648021	-	grapa	GRB2 related adaptor protein a [Source:ZFIN%3BAcc:ZDB-GENE-050522-347]	-	-	-
ENSDARG00000005416	6737	244	2.51	214	2.28	245	2.27	251	2.07	20	3005472	3087162	-	map3k5	mitogen-activated protein kinase kinase kinase 5 [Source:ZFIN%3BAcc:ZDB-GENE-030827-3]	GO:0006468:protein phosphorylation;	-	GO:0005524:ATP binding;GO:0004674:protein serine/threonine kinase activity;
ENSDARG00000005423	1774	652	25.43	644	26.08	828	29.09	848	26.59	13	31393192	31397987	-	pgam1a	phosphoglycerate mutase 1a [Source:ZFIN%3BAcc:ZDB-GENE-030131-1827]	GO:0006096:glycolytic process;	-	GO:0004619:phosphoglycerate mutase activity;
ENSDARG00000005425	1794	149	5.75	142	5.69	138	4.79	187	5.8	15	43208593	43238220	-	wdfy1	WD repeat and FYVE domain containing 1 [Source:ZFIN%3BAcc:ZDB-GENE-041024-4]	-	-	GO:0046872:metal ion binding;
ENSDARG00000005448	1655	96	4.01	89	3.86	84	3.16	128	4.3	7	52753067	52761572	+	mtfmt	mitochondrial methionyl-tRNA formyltransferase [Source:ZFIN%3BAcc:ZDB-GENE-060929-120]	GO:0071951:conversion of methionyl-tRNA to N-formyl-methionyl-tRNA;GO:0009058:biosynthetic process;	-	GO:0004479:methionyl-tRNA formyltransferase activity;
ENSDARG00000005451	2542	5819	158.36	5680	160.5	6359	155.93	7265	158.97	4	11464255	11477630	+	gdi2	GDP dissociation inhibitor 2 [Source:ZFIN%3BAcc:ZDB-GENE-030131-2485]	GO:0015031:protein transport;	-	GO:0005093:Rab GDP-dissociation inhibitor activity;
ENSDARG00000005453	3951	141	2.47	138	2.51	121	1.91	182	2.56	4	6423041	6623645	-	foxp2	forkhead box P2 [Source:ZFIN%3BAcc:ZDB-GENE-041203-2]	GO:0060013:righting reflex;GO:0006357:regulation of transcription from RNA polymerase II promoter;GO:0040007:growth;GO:0048286:lung alveolus development;GO:0043010:camera-type eye development;GO:0007389:pattern specification process;GO:0009791:post-embryonic development;GO:0021987:cerebral cortex development;GO:0051090:regulation of sequence-specific DNA binding transcription factor activity;GO:0…	GO:0005737:cytoplasm;GO:0005667:transcription factor complex;	GO:0008270:zinc ion binding;GO:0046982:protein heterodimerization activity;GO:0003705:RNA polymerase II distal enhancer sequence-specific DNA binding transcription factor activity;GO:0043565:sequence-specific DNA binding;GO:0003690:double-stranded DNA binding;GO:0042803:protein homodimerization activity;GO:0003682:chromatin binding;GO:0008134:transcription factor binding;GO:0008301:DNA binding, b…
ENSDARG00000005454	3337	3188	66.09	2983	64.21	3572	66.72	4252	70.87	13	35880573	35892305	-	tacc3	transforming%2C acidic coiled-coil containing protein 3 [Source:ZFIN%3BAcc:ZDB-GENE-050522-327]	-	-	-
ENSDARG00000005456	3378	784	16.06	712	15.14	792	14.61	925	15.23	7	52158818	52285349	+	katnb1	katanin p80 (WD repeat containing) subunit B 1 [Source:NCBI gene%3BAcc:406291]	GO:0051013:microtubule severing;GO:0007067:mitotic nuclear division;GO:0051301:cell division;GO:0007049:cell cycle;	GO:0000922:spindle pole;GO:0008352:katanin complex;GO:0005874:microtubule;GO:0005737:cytoplasm;GO:0043234:protein complex;GO:0044430:cytoskeletal part;GO:0015630:microtubule cytoskeleton;	GO:0008017:microtubule binding;
ENSDARG00000005458	3324	1073	22.33	943	20.38	1170	21.94	1367	22.87	2	23039041	23078748	+	csnk1g2a	casein kinase 1%2C gamma 2a [Source:ZFIN%3BAcc:ZDB-GENE-030131-6445]	GO:0006468:protein phosphorylation;	-	GO:0005524:ATP binding;GO:0004674:protein serine/threonine kinase activity;
ENSDARG00000005462	7976	1809	15.69	1711	15.41	1924	15.04	2426	16.92	21	44735181	44772738	-	kif4	kinesin family member 4 [Source:ZFIN%3BAcc:ZDB-GENE-040426-1545]	GO:0007018:microtubule-based movement;	GO:0005875:microtubule associated complex;GO:0005874:microtubule;	GO:0005524:ATP binding;GO:0003777:microtubule motor activity;
ENSDARG00000005463	2996	484	11.18	509	12.2	523	10.88	617	11.45	20	13894123	13913790	+	slc30a1a	solute carrier family 30 member 1a [Source:ZFIN%3BAcc:ZDB-GENE-040426-1840]	GO:0006829:zinc II ion transport;GO:0010043:response to zinc ion;GO:0055085:transmembrane transport;	GO:0016021:integral component of membrane;	GO:0005385:zinc ion transmembrane transporter activity;
ENSDARG00000005464	1741	189	7.51	165	6.81	189	6.77	203	6.49	23	19701587	19711988	+	dnase1l1	deoxyribonuclease I-like 1 [Source:ZFIN%3BAcc:ZDB-GENE-040426-2170]	GO:0006308:DNA catabolic process;	-	GO:0016888:endodeoxyribonuclease activity, producing 5'-phosphomonoesters;
ENSDARG00000005468	3178	675	14.69	688	15.55	796	15.61	956	16.73	18	46361544	46369516	-	irf2bp1	interferon regulatory factor 2 binding protein 1 [Source:NCBI gene%3BAcc:556852]	-	-	-
ENSDARG00000005476	8267	755	6.32	625	5.43	834	6.29	988	6.65	4	20812900	20987564	+	nav3	neuron navigator 3 [Source:NCBI gene%3BAcc:567779]	-	-	-
ENSDARG00000005479	15558	2248	10	1980	9.14	2631	10.54	3303	11.81	1	39387876	39779913	+	tenm3	Teneurin-3 [Source:UniProtKB/Swiss-Prot%3BAcc:Q9W7R4]	-	-	-
ENSDARG00000005481	1553	114	5.08	113	5.23	88	3.53	115	4.12	20	16881883	16884737	+	nfkbiaa	nuclear factor of kappa light polypeptide gene enhancer in B-cells inhibitor%2C alpha a [Source:ZFIN%3BAcc:ZDB-GENE-040426-2227]	GO:0009615:response to virus;	-	-
ENSDARG00000005482	10701	663	4.29	634	4.26	779	4.54	956	4.97	14	47779846	48033073	-	rapgef2	Rap guanine nucleotide exchange factor (GEF) 2 [Source:ZFIN%3BAcc:ZDB-GENE-030131-6959]	-	-	-
ENSDARG00000005485	1422	121	5.89	113	5.71	152	6.66	151	5.91	25	7982979	7988936	+	ucmab	upper zone of growth plate and cartilage matrix associated b [Source:NCBI gene%3BAcc:405870]	GO:0048706:embryonic skeletal system development;	GO:0005578:proteinaceous extracellular matrix;GO:0005576:extracellular region;	-
ENSDARG00000005500	5969	140	1.62	153	1.84	154	1.61	172	1.6	8	1632622	1649242	-	dgcr6	DiGeorge syndrome critical region gene 6 [Source:ZFIN%3BAcc:ZDB-GENE-040912-125]	-	-	-
ENSDARG00000005510	1610	72	3.09	62	2.77	134	5.19	114	3.94	19	22999181	23002883	+	gdf6b	growth differentiation factor 6b [Source:NCBI gene%3BAcc:30180]	GO:0040007:growth;	GO:0005576:extracellular region;	GO:0008083:growth factor activity;
ENSDARG00000005513	6590	23193	243.47	24151	263.23	25676	242.87	29068	245.34	23	17865554	17876777	+	naca	nascent polypeptide associated complex subunit alpha [Source:NCBI gene%3BAcc:195823]	GO:0030239:myofibril assembly;GO:0015031:protein transport;	GO:0005737:cytoplasm;GO:0005634:nucleus;	-
ENSDARG00000005518	2201	6	0.19	11	0.36	41	1.16	62	1.57	8	15254564	15268932	+	slc5a9	solute carrier family 5 member 9 [Source:NCBI gene%3BAcc:564815]	GO:0006814:sodium ion transport;GO:0055085:transmembrane transport;GO:0006811:ion transport;	GO:0016021:integral component of membrane;GO:0016020:membrane;	GO:0005215:transporter activity;
ENSDARG00000005522	2535	0	0	0	0	6	0.15	6	0.13	19	21919856	21924241	+	galr1a	galanin receptor 1a [Source:ZFIN%3BAcc:ZDB-GENE-060503-290]	-	-	-
ENSDARG00000005525	3536	465	9.1	423	8.59	610	10.75	583	9.17	1	52489962	52498146	-	acy3.2	aspartoacylase (aminocyclase) 3%2C tandem duplicate 2 [Source:NCBI gene%3BAcc:436619]	GO:0008152:metabolic process;	GO:0016324:apical plasma membrane;GO:0005737:cytoplasm;	GO:0016788:hydrolase activity, acting on ester bonds;GO:0046872:metal ion binding;GO:0016811:hydrolase activity, acting on carbon-nitrogen (but not peptide) bonds, in linear amides;
ENSDARG00000005526	2290	187	5.65	112	3.51	200	5.44	244	5.93	6	46878889	46941245	-	igfn1.1	immunoglobulin like and fibronectin type III domain containing 1%2C tandem duplicate 1 [Source:ZFIN%3BAcc:ZDB-GENE-050327-30]	-	-	-
ENSDARG00000005536	2123	729	23.76	630	21.31	809	23.75	918	24.05	20	27093042	27107709	+	ubr7	ubiquitin protein ligase E3 component n-recognin 7 [Source:ZFIN%3BAcc:ZDB-GENE-030131-1535]	-	-	GO:0008270:zinc ion binding;GO:0004842:ubiquitin-protein transferase activity;
ENSDARG00000005540	5036	1527	20.98	1421	20.27	1559	19.3	1919	21.2	10	20070178	20128254	+	xpo7	exportin 7 [Source:ZFIN%3BAcc:ZDB-GENE-060628-2]	-	-	-
ENSDARG00000005541	1883	352	12.93	307	11.71	351	11.62	448	13.23	4	12931763	12956718	+	wif1	wnt inhibitory factor 1 [Source:NCBI gene%3BAcc:30476]	GO:0090090:negative regulation of canonical Wnt signaling pathway;GO:0007275:multicellular organismal development;	GO:0005576:extracellular region;	-
ENSDARG00000005544	2157	93	2.98	80	2.66	77	2.23	101	2.6	1	51191049	51197601	+	btbd3a	BTB (POZ) domain containing 3a [Source:ZFIN%3BAcc:ZDB-GENE-090312-7]	-	-	-
ENSDARG00000005547	2611	202	5.35	248	6.82	299	7.14	293	6.24	4	18500012	18512550	-	rint1	RAD50 interactor 1 [Source:ZFIN%3BAcc:ZDB-GENE-041210-174]	-	-	-
ENSDARG00000005549	3256	515	10.94	412	9.09	483	9.25	593	10.13	7	30209911	30227878	-	znf710b	zinc finger protein 710b [Source:ZFIN%3BAcc:ZDB-GENE-120503-2]	-	-	-
ENSDARG00000005551	1865	5222	193.7	5446	209.74	6263	209.33	6730	200.72	21	30169610	30181764	-	hnrnph1l	heterogeneous nuclear ribonucleoprotein H1%2C like [Source:ZFIN%3BAcc:ZDB-GENE-030131-275]	-	-	GO:0003676:nucleic acid binding;GO:0000166:nucleotide binding;
ENSDARG00000005559	2732	48	1.22	62	1.63	81	1.85	65	1.32	6	4539953	4543005	+	pou4f1	POU class 4 homeobox 1 [Source:ZFIN%3BAcc:ZDB-GENE-000523-2]	-	-	-
ENSDARG00000005560	2482	2032	56.64	1936	56.03	2313	58.09	2405	53.9	10	17166035	17170086	-	ywhah	tyrosine 3-monooxygenase/tryptophan 5-monooxygenase activation protein%2C eta polypeptide [Source:ZFIN%3BAcc:ZDB-GENE-040426-2191]	-	-	GO:0004497:monooxygenase activity;GO:0019904:protein domain specific binding;
ENSDARG00000005561	2815	178	4.37	175	4.47	182	4.03	218	4.31	5	34578479	34600710	+	gfm2	G elongation factor%2C mitochondrial 2 [Source:NCBI gene%3BAcc:558184]	GO:0032790:ribosome disassembly;GO:0032543:mitochondrial translation;	GO:0005739:mitochondrion;	GO:0005525:GTP binding;GO:0003924:GTPase activity;
ENSDARG00000005565	6278	4	0.04	5	0.06	16	0.16	14	0.12	6	41038757	41060423	+	entpd8	ectonucleoside triphosphate diphosphohydrolase 8 [Source:ZFIN%3BAcc:ZDB-GENE-040724-142]	-	-	GO:0016787:hydrolase activity;
ENSDARG00000005574	1720	710	28.56	631	26.35	723	26.2	883	28.55	17	31652640	31659670	-	vsx2	visual system homeobox 2 [Source:NCBI gene%3BAcc:796163]	GO:0050896:response to stimulus;GO:0000122:negative regulation of transcription from RNA polymerase II promoter;GO:0007601:visual perception;GO:0007275:multicellular organismal development;	GO:0005634:nucleus;	GO:0043565:sequence-specific DNA binding;GO:0003700:sequence-specific DNA binding transcription factor activity;
ENSDARG00000005576	4109	1382	23.27	1406	24.58	1610	24.42	2061	27.9	9	21462467	21488976	-	mphosph8	M-phase phosphoprotein 8 [Source:ZFIN%3BAcc:ZDB-GENE-050309-191]	-	GO:0005634:nucleus;	-
ENSDARG00000005578	1817	23	0.88	29	1.15	25	0.86	28	0.86	1	50997156	51015627	+	ugp2a	UDP-glucose pyrophosphorylase 2a [Source:ZFIN%3BAcc:ZDB-GENE-090311-46]	-	-	-
ENSDARG00000005586	4184	4	0.07	4	0.07	2	0.03	5	0.07	5	67533180	67661102	-	zbtb20	zinc finger and BTB domain containing 20 [Source:ZFIN%3BAcc:ZDB-GENE-070112-1992]	-	GO:0005634:nucleus;	GO:0003676:nucleic acid binding;GO:0008270:zinc ion binding;
ENSDARG00000005590	6664	599	6.22	555	5.98	713	6.67	720	6.01	2	10603550	10641998	-	mtf2	metal response element binding transcription factor 2 [Source:ZFIN%3BAcc:ZDB-GENE-060512-94]	-	-	GO:0008270:zinc ion binding;
ENSDARG00000005593	1867	71	2.63	52	2	170	5.68	166	4.95	2	20725684	20776841	+	rxrga	retinoid x receptor%2C gamma a [Source:NCBI gene%3BAcc:30464]	-	-	-
ENSDARG00000005595	5313	31	0.4	31	0.42	39	0.46	30	0.31	20	31929377	32007209	-	adgb	androglobin [Source:ZFIN%3BAcc:ZDB-GENE-041001-205]	-	-	-
ENSDARG00000005606	4637	1269	18.93	1161	17.98	1418	19.06	1771	21.24	2	29902294	29923630	-	paxip1	PAX interacting (with transcription-activation domain) protein 1 [Source:NCBI gene%3BAcc:449658]	-	-	-
ENSDARG00000005612	2406	761	21.88	805	24.03	994	25.75	1008	23.3	7	29176924	29186939	+	aph1b	APH1B gamma secretase subunit [Source:NCBI gene%3BAcc:386808]	GO:0043085:positive regulation of catalytic activity;GO:0016485:protein processing;GO:0007219:Notch signaling pathway;	GO:0016021:integral component of membrane;	-
ENSDARG00000005616	1779	1	0.04	3	0.12	2	0.07	1	0.03	21	27437867	27443995	-	bfb	complement component bfb [Source:ZFIN%3BAcc:ZDB-GENE-990415-34]	GO:0006956:complement activation;GO:0009617:response to bacterium;GO:0006508:proteolysis;	GO:0005576:extracellular region;	GO:0004252:serine-type endopeptidase activity;
ENSDARG00000005619	2999	240	5.54	233	5.58	261	5.42	348	6.45	20	13883131	13894916	+	nek2	NIMA-related kinase 2 [Source:ZFIN%3BAcc:ZDB-GENE-040426-752]	GO:0006468:protein phosphorylation;	-	GO:0005524:ATP binding;GO:0004674:protein serine/threonine kinase activity;
ENSDARG00000005625	2577	143	3.84	109	3.04	124	3	169	3.65	19	29303847	29333867	+	maco1a	macoilin 1a [Source:NCBI gene%3BAcc:393289]	-	GO:0016021:integral component of membrane;GO:0030424:axon;GO:0031965:nuclear membrane;	-
ENSDARG00000005626	1554	30	1.34	17	0.79	21	0.84	10	0.36	1	53980120	53988017	-	RHOU	si:ch211-133l11.10 [Source:ZFIN%3BAcc:ZDB-GENE-141219-14]	-	-	-
ENSDARG00000005627	513	31	4.18	20	2.8	19	2.31	24	2.6	17	53356451	53360342	+	zmp:0000000527	zmp:0000000527 [Source:ZFIN%3BAcc:ZDB-GENE-130530-530]	-	-	-
ENSDARG00000005629	5723	431	5.21	416	5.22	486	5.29	749	7.28	20	572037	592746	+	smyd2b	SET and MYND domain containing 2b [Source:NCBI gene%3BAcc:568616]	GO:0000122:negative regulation of transcription from RNA polymerase II promoter;GO:0018026:peptidyl-lysine monomethylation;GO:0008285:negative regulation of cell proliferation;GO:0018027:peptidyl-lysine dimethylation;GO:0043516:regulation of DNA damage response, signal transduction by p53 class mediator;GO:0016568:chromatin modification;	GO:0005829:cytosol;GO:0005634:nucleus;	GO:0046975:histone methyltransferase activity (H3-K36 specific);GO:0000993:RNA polymerase II core binding;GO:0008270:zinc ion binding;
ENSDARG00000005640	1485	80	3.73	110	5.32	99	4.16	120	4.49	9	41035925	41040492	-	adat3	adenosine deaminase tRNA specific 3 [Source:NCBI gene%3BAcc:368634]	GO:0008033:tRNA processing;	-	GO:0016787:hydrolase activity;GO:0008270:zinc ion binding;
ENSDARG00000005643	1722	481	19.32	455	18.98	507	18.35	550	17.77	3	25990052	25998243	+	gcat	glycine C-acetyltransferase [Source:ZFIN%3BAcc:ZDB-GENE-060518-3]	GO:0009058:biosynthetic process;	-	GO:0030170:pyridoxal phosphate binding;GO:0008890:glycine C-acetyltransferase activity;
ENSDARG00000005645	7082	1648	16.1	1647	16.7	1877	16.52	2652	20.83	10	31298972	31563049	-	robo3	roundabout%2C axon guidance receptor%2C homolog 3 (Drosophila) [Source:ZFIN%3BAcc:ZDB-GENE-000209-4]	GO:0048675:axon extension;GO:0071679:commissural neuron axon guidance;GO:0048264:determination of ventral identity;GO:0016199:axon midline choice point recognition;	GO:0005887:integral component of plasma membrane;	GO:0005515:protein binding;
ENSDARG00000005648	2099	94	3.1	129	4.41	174	5.17	209	5.54	8	41281801	41342918	+	olfml2a	olfactomedin-like 2A [Source:ZFIN%3BAcc:ZDB-GENE-081105-107]	-	-	-
ENSDARG00000005651	3051	303	6.87	371	8.73	393	8.03	422	7.69	7	49638413	49654492	-	hrasb	HRas proto-oncogene%2C GTPase b [Source:ZFIN%3BAcc:ZDB-GENE-050522-466]	GO:0007264:small GTPase mediated signal transduction;	GO:0016020:membrane;	GO:0003924:GTPase activity;GO:0005525:GTP binding;
ENSDARG00000005652	7969	1174	10.19	1056	9.52	1265	9.89	1355	9.46	20	41021054	41242638	+	man1a1	mannosidase%2C alpha%2C class 1A%2C member 1 [Source:ZFIN%3BAcc:ZDB-GENE-041014-321]	-	-	-
ENSDARG00000005670	4521	61	0.93	62	0.99	61	0.84	85	1.05	17	45216084	45254585	-	ttbk2a	tau tubulin kinase 2a [Source:ZFIN%3BAcc:ZDB-GENE-120928-3]	-	-	-
ENSDARG00000005673	1353	43	2.2	45	2.39	44	2.03	74	3.04	2	15100742	15106968	+	f3b	coagulation factor IIIb [Source:ZFIN%3BAcc:ZDB-GENE-050417-234]	GO:0007596:blood coagulation;GO:0001944:vasculature development;	GO:0016021:integral component of membrane;	-
ENSDARG00000005675	2903	1534	36.56	1579	39.07	1640	35.21	1735	33.24	6	42377911	42388608	-	sec61a1l	SEC61 translocon alpha 1 subunit%2C like [Source:NCBI gene%3BAcc:266796]	GO:0015031:protein transport;	GO:0016021:integral component of membrane;GO:0005789:endoplasmic reticulum membrane;	-
ENSDARG00000005679	6150	227	2.55	198	2.31	256	2.59	291	2.63	3	54431093	54500354	-	trip10a	thyroid hormone receptor interactor 10a [Source:NCBI gene%3BAcc:492762]	GO:0006897:endocytosis;	GO:0005856:cytoskeleton;GO:0005764:lysosome;GO:0005938:cell cortex;GO:0005886:plasma membrane;	GO:0008289:lipid binding;
ENSDARG00000005690	6252	186	2.06	215	2.47	211	2.1	278	2.47	1	54974191	54997746	-	slc25a23a	solute carrier family 25 member 23a [Source:ZFIN%3BAcc:ZDB-GENE-121214-154]	-	-	-
ENSDARG00000005699	3355	2444	50.39	2389	51.15	2856	53.06	3032	50.27	11	3523358	3535581	-	ddx19	DEAD/H (Asp-Glu-Ala-Asp/His) box polypeptide 19 (DBP5 homolog%2C yeast) [Source:ZFIN%3BAcc:ZDB-GENE-020419-30]	-	-	GO:0003676:nucleic acid binding;GO:0005524:ATP binding;GO:0008026:ATP-dependent helicase activity;
ENSDARG00000005704	3266	8	0.17	4	0.09	7	0.13	9	0.15	8	25308003	25329967	-	eps8l3b	EPS8-like 3b [Source:ZFIN%3BAcc:ZDB-GENE-040426-1335]	-	-	-
ENSDARG00000005713	1394	56	2.78	59	3.04	43	1.92	59	2.35	16	54303491	54320489	+	ethe1	ETHE1 persulfide dioxygenase [Source:ZFIN%3BAcc:ZDB-GENE-040426-2503]	-	-	GO:0016787:hydrolase activity;
ENSDARG00000005716	2652	28	0.73	23	0.62	18	0.42	26	0.55	20	33792156	33806508	+	olfml2ba	olfactomedin-like 2Ba [Source:ZFIN%3BAcc:ZDB-GENE-041014-329]	-	-	-
ENSDARG00000005738	1617	895	38.29	978	43.44	1010	38.93	1241	42.69	11	16094661	16115804	-	rpf1	ribosome production factor 1 homolog [Source:NCBI gene%3BAcc:415250]	GO:0006364:rRNA processing;	GO:0005730:nucleolus;	GO:0019843:rRNA binding;
ENSDARG00000005739	2308	295	8.84	296	9.21	329	8.89	329	7.93	1	28961653	29045426	-	gpm6ba	glycoprotein M6Ba [Source:ZFIN%3BAcc:ZDB-GENE-030710-9]	-	GO:0016021:integral component of membrane;	-
ENSDARG00000005749	4872	38	0.54	36	0.53	47	0.6	78	0.89	22	31045277	31060579	-	cand2	cullin-associated and neddylation-dissociated 2 (putative) [Source:ZFIN%3BAcc:ZDB-GENE-060503-645]	-	-	-
ENSDARG00000005754	8404	3465	28.52	3054	26.1	3632	26.94	4518	29.9	2	17578320	17947389	-	ptprfb	protein tyrosine phosphatase receptor type Fb [Source:NCBI gene%3BAcc:799867]	GO:0007155:cell adhesion;GO:0006470:protein dephosphorylation;	GO:0016021:integral component of membrane;	GO:0004725:protein tyrosine phosphatase activity;GO:0008201:heparin binding;
ENSDARG00000005762	8308	2570	21.4	2321	20.07	2759	20.7	3429	22.96	16	14684916	15050842	+	col14a1a	collagen%2C type XIV%2C alpha 1a [Source:ZFIN%3BAcc:ZDB-GENE-030131-9889]	-	-	-
ENSDARG00000005772	1132	824	50.36	881	55.9	1039	57.21	1075	52.82	8	8341082	8349653	-	tsr2	TSR2 ribosome maturation factor [Source:NCBI gene%3BAcc:317639]	GO:0006364:rRNA processing;	-	-
ENSDARG00000005774	5959	7512	87.21	7583	91.4	9051	94.68	9832	91.77	6	59832786	59850404	+	ddx3xb	DEAD-box helicase 3 X-linked b [Source:ZFIN%3BAcc:ZDB-GENE-980526-150]	-	-	GO:0003676:nucleic acid binding;GO:0005524:ATP binding;GO:0008026:ATP-dependent helicase activity;
ENSDARG00000005775	6816	253	2.57	213	2.24	290	2.65	311	2.54	23	27251626	27345425	-	scn8aa	sodium channel%2C voltage gated%2C type VIII%2C alpha subunit a [Source:ZFIN%3BAcc:ZDB-GENE-000828-1]	GO:0006814:sodium ion transport;GO:0034765:regulation of ion transmembrane transport;GO:0007638:mechanosensory behavior;GO:0008345:larval locomotory behavior;GO:0008045:motor neuron axon guidance;	GO:0001518:voltage-gated sodium channel complex;	GO:0005248:voltage-gated sodium channel activity;
ENSDARG00000005776	1578	1	0.04	1	0.05	0	0	2	0.07	8	18230948	18239498	-	guk1b	guanylate kinase 1b [Source:ZFIN%3BAcc:ZDB-GENE-020916-1]	GO:0016310:phosphorylation;GO:0006163:purine nucleotide metabolic process;	-	GO:0004385:guanylate kinase activity;
ENSDARG00000005780	1128	5	0.31	3	0.19	4	0.22	3	0.15	8	51634803	51635930	-	npy8br	neuropeptide Y receptor Y8b [Source:ZFIN%3BAcc:ZDB-GENE-980526-208]	GO:0007218:neuropeptide signaling pathway;	GO:0016021:integral component of membrane;	GO:0004983:neuropeptide Y receptor activity;
ENSDARG00000005783	4470	53	0.82	53	0.85	49	0.68	109	1.36	22	17864872	18116635	-	ncanb	neurocan b [Source:ZFIN%3BAcc:ZDB-GENE-050208-586]	-	-	-
ENSDARG00000005786	1924	48	1.73	30	1.12	44	1.43	56	1.62	5	13181029	13206878	-	ppm1f	protein phosphatase%2C Mg2+/Mn2+ dependent%2C 1F [Source:ZFIN%3BAcc:ZDB-GENE-051128-2]	GO:0006470:protein dephosphorylation;GO:0016310:phosphorylation;	-	GO:0016301:kinase activity;GO:0046872:metal ion binding;GO:0004722:protein serine/threonine phosphatase activity;
ENSDARG00000005789	4508	335	5.14	341	5.43	446	6.17	457	5.64	20	13403281	13521010	+	enpp1	ectonucleotide pyrophosphatase/phosphodiesterase 1 [Source:ZFIN%3BAcc:ZDB-GENE-040724-172]	GO:0006955:immune response;GO:0008152:metabolic process;	-	GO:0046872:metal ion binding;GO:0003676:nucleic acid binding;GO:0030247:polysaccharide binding;GO:0016787:hydrolase activity;GO:0005044:scavenger receptor activity;
ENSDARG00000005791	2188	13559	428.7	12757	418.79	14901	424.51	18295	465.09	16	51883725	51889734	-	rpl28	ribosomal protein L28 [Source:ZFIN%3BAcc:ZDB-GENE-040930-10]	GO:0009790:embryo development;GO:0006412:translation;	GO:0005840:ribosome;	GO:0003735:structural constituent of ribosome;
ENSDARG00000005799	2287	36	1.09	34	1.07	32	0.87	35	0.85	1	23297623	23308308	-	smim14	small integral membrane protein 14 [Source:ZFIN%3BAcc:ZDB-GENE-040426-22]	-	-	-
ENSDARG00000005800	5615	2	0.02	0	0	3	0.03	0	0	7	66836476	66868543	-	ampd3a	adenosine monophosphate deaminase 3a [Source:ZFIN%3BAcc:ZDB-GENE-110407-2]	-	-	-
ENSDARG00000005814	1881	0	0	2	0.08	1	0.03	0	0	17	4386649	4396692	-	klhl10a	kelch-like family member 10a [Source:ZFIN%3BAcc:ZDB-GENE-131015-1]	-	-	-
ENSDARG00000005821	3407	46	0.93	40	0.84	46	0.84	54	0.88	7	41329748	41338923	-	ncf2	neutrophil cytosolic factor 2 [Source:ZFIN%3BAcc:ZDB-GENE-070209-29]	-	-	-
ENSDARG00000005823	5848	1250	14.79	1183	14.53	1322	14.09	1468	13.96	9	24920677	24951662	+	slc39a10	solute carrier family 39 member 10 [Source:NCBI gene%3BAcc:393644]	GO:0006829:zinc II ion transport;GO:0010043:response to zinc ion;GO:0055085:transmembrane transport;	GO:0016021:integral component of membrane;	GO:0005385:zinc ion transmembrane transporter activity;
ENSDARG00000005827	1523	1943	88.26	2101	99.09	2358	96.51	2616	95.54	17	34244345	34254233	+	eif2s1a	eukaryotic translation initiation factor 2%2C subunit 1 alpha a [Source:ZFIN%3BAcc:ZDB-GENE-030131-526]	GO:0006413:translational initiation;	GO:0005850:eukaryotic translation initiation factor 2 complex;	GO:0003743:translation initiation factor activity;
ENSDARG00000005828	1744	39	1.55	39	1.61	63	2.25	50	1.59	9	23748133	23755337	+	faima	Fas apoptotic inhibitory molecule a [Source:ZFIN%3BAcc:ZDB-GENE-040718-323]	GO:0043066:negative regulation of apoptotic process;	-	-
ENSDARG00000005834	2635	160	4.2	146	3.98	140	3.31	234	4.94	19	41701660	41724246	+	gatad2b	GATA zinc finger domain containing 2B [Source:ZFIN%3BAcc:ZDB-GENE-060503-655]	-	-	GO:0005488:binding;
ENSDARG00000005840	1981	1266	44.21	1272	46.12	1398	43.99	1407	39.51	7	51774502	51793881	+	got2b	glutamic-oxaloacetic transaminase 2b%2C mitochondrial [Source:ZFIN%3BAcc:ZDB-GENE-030131-7917]	GO:0006520:cellular amino acid metabolic process;GO:0009058:biosynthetic process;	-	GO:0030170:pyridoxal phosphate binding;GO:0004069:L-aspartate:2-oxoglutarate aminotransferase activity;GO:0080130:L-phenylalanine:2-oxoglutarate aminotransferase activity;
ENSDARG00000005841	3676	6	0.11	12	0.23	18	0.31	3	0.05	25	31238606	31248602	+	tnni2a.2	troponin I type 2a (skeletal%2C fast)%2C tandem duplicate 2 [Source:ZFIN%3BAcc:ZDB-GENE-040426-970]	-	GO:0005861:troponin complex;	-
ENSDARG00000005842	1719	138	5.55	135	5.64	115	4.17	101	3.27	18	7122577	7143920	-	cd9a	CD9 molecule a [Source:ZFIN%3BAcc:ZDB-GENE-030131-1175]	-	GO:0016021:integral component of membrane;	-
ENSDARG00000005846	2092	8	0.26	4	0.14	9	0.27	8	0.21	6	3730843	3813374	+	SP5	Sp5 transcription factor b [Source:NCBI gene%3BAcc:799504]	-	-	-
ENSDARG00000005853	1238	5	0.28	11	0.64	1	0.05	9	0.4	9	34866576	34871900	-	slc25a6	solute carrier family 25 member 6 [Source:ZFIN%3BAcc:ZDB-GENE-070912-446]	GO:0055085:transmembrane transport;	GO:0005743:mitochondrial inner membrane;GO:0016021:integral component of membrane;	GO:0005215:transporter activity;
ENSDARG00000005861	8039	329	2.83	312	2.79	304	2.36	355	2.46	17	41475606	41798856	-	ralgapa2	Ral GTPase activating protein%2C alpha subunit 2 (catalytic) [Source:ZFIN%3BAcc:ZDB-GENE-131122-56]	-	-	-
ENSDARG00000005865	1911	0	0	0	0	1	0.03	0	0	15	18221859	18223769	-	or131-1	odorant receptor%2C family H%2C subfamily 131%2C member 1 [Source:ZFIN%3BAcc:ZDB-GENE-070806-45]	GO:0007186:G-protein coupled receptor signaling pathway;	GO:0016021:integral component of membrane;	GO:0004930:G-protein coupled receptor activity;
ENSDARG00000005867	6756	1030	10.55	937	9.96	1134	10.46	1488	12.25	16	28994709	29024769	+	gon4l	gon-4-like (C. elegans) [Source:ZFIN%3BAcc:ZDB-GENE-070117-2447]	GO:0006355:regulation of transcription, DNA-templated;	GO:0005634:nucleus;	GO:0003677:DNA binding;
ENSDARG00000005870	1464	308	14.55	285	13.98	323	13.75	352	13.37	9	23049500	23056240	+	mmadhc	metabolism of cobalamin associated D [Source:ZFIN%3BAcc:ZDB-GENE-040704-50]	GO:0009235:cobalamin metabolic process;	GO:0005739:mitochondrion;	-
ENSDARG00000005883	3598	118	2.27	83	1.66	115	1.99	119	1.84	3	19152222	19200651	-	rfx1a	regulatory factor X%2C 1a (influences HLA class II expression) [Source:ZFIN%3BAcc:ZDB-GENE-070424-94]	GO:0006355:regulation of transcription, DNA-templated;	GO:0005634:nucleus;	GO:0003677:DNA binding;
ENSDARG00000005891	1907	810	29.38	691	26.03	801	26.18	862	25.14	4	11804675	11810799	-	cyb5r3	cytochrome b5 reductase 3 [Source:ZFIN%3BAcc:ZDB-GENE-030131-3281]	GO:0055114:oxidation-reduction process;	-	GO:0016491:oxidoreductase activity;
ENSDARG00000005894	2327	13	0.39	16	0.49	35	0.94	55	1.31	7	38507006	38527833	+	slc7a9	solute carrier family 7 member 9 [Source:ZFIN%3BAcc:ZDB-GENE-080116-2]	-	-	-
ENSDARG00000005897	1444	105	5.03	90	4.48	107	4.62	141	5.43	4	12755136	12766418	-	dera	deoxyribose-phosphate aldolase (putative) [Source:ZFIN%3BAcc:ZDB-GENE-041010-200]	-	-	-
ENSDARG00000005908	3968	735	12.81	706	12.78	826	12.98	825	11.56	21	32280175	32301109	-	clk4b	CDC-like kinase 4b [Source:ZFIN%3BAcc:ZDB-GENE-050227-19]	-	-	-
ENSDARG00000005913	2459	2	0.06	7	0.2	1	0.03	1	0.02	23	40234602	40250886	-	tgm1l3	transglutaminase 1 like 3 [Source:ZFIN%3BAcc:ZDB-GENE-120718-1]	-	-	-
ENSDARG00000005915	3102	752	16.77	582	13.48	750	15.07	1010	18.11	2	57310523	57379216	-	tcf3a	transcription factor 3a [Source:ZFIN%3BAcc:ZDB-GENE-990415-51]	GO:0055002:striated muscle cell development;	-	GO:0046983:protein dimerization activity;
ENSDARG00000005916	2557	298	8.06	300	8.43	341	8.31	427	9.29	8	8291492	8339372	+	srpk3	SRSF protein kinase 3 [Source:ZFIN%3BAcc:ZDB-GENE-101025-2]	-	-	-
ENSDARG00000005924	2750	64	1.61	89	2.32	149	3.38	108	2.18	20	27371394	27381691	-	serpina10a	serpin peptidase inhibitor%2C clade A (alpha-1 antiproteinase%2C antitrypsin)%2C member 10a [Source:ZFIN%3BAcc:ZDB-GENE-041014-246]	-	-	-
ENSDARG00000005926	1575	2116	92.94	1996	91.03	2102	83.19	2461	86.91	19	35418683	35428914	-	ak2	adenylate kinase 2 [Source:NCBI gene%3BAcc:321793]	GO:0046939:nucleotide phosphorylation;GO:0002521:leukocyte differentiation;	GO:0005758:mitochondrial intermembrane space;	GO:0004017:adenylate kinase activity;GO:0005524:ATP binding;
ENSDARG00000005927	2438	476	13.51	438	12.9	523	13.37	531	12.11	3	30166946	30186298	-	tbc1d17	TBC1 domain family%2C member 17 [Source:ZFIN%3BAcc:ZDB-GENE-050522-79]	-	GO:0005622:intracellular;	-
ENSDARG00000005941	6578	2482	26.1	2315	25.28	2762	26.17	3183	26.91	2	31271082	31364659	+	clul1	clusterin-like 1 (retinal) [Source:ZFIN%3BAcc:ZDB-GENE-031118-57]	GO:0046777:protein autophosphorylation;GO:0045859:regulation of protein kinase activity;GO:0060027:convergent extension involved in gastrulation;	GO:0005815:microtubule organizing center;GO:0005829:cytosol;GO:0005886:plasma membrane;	GO:0005524:ATP binding;GO:0004715:non-membrane spanning protein tyrosine kinase activity;
ENSDARG00000005942	2790	0	0	0	0	0	0	0	0	18	34225520	34242558	+	vmn2r1	vomeronasal 2%2C receptor 1 [Source:ZFIN%3BAcc:ZDB-GENE-050419-65]	-	-	-
ENSDARG00000005943	2299	8	0.24	6	0.19	2	0.05	5	0.12	5	26930062	26950374	-	htra4	HtrA serine peptidase 4 [Source:ZFIN%3BAcc:ZDB-GENE-131120-192]	-	-	-
ENSDARG00000005945	2788	2434	60.4	2385	61.45	2807	62.76	3853	76.87	21	27302752	27324771	+	sart1	spliceosome associated factor 1%2C recruiter of U4/U6.U5 tri-snRNP [Source:ZFIN%3BAcc:ZDB-GENE-040718-422]	-	-	-
ENSDARG00000005948	2189	253	8	261	8.56	302	8.6	293	7.45	15	34573311	34590820	-	ankmy2a	ankyrin repeat and MYND domain containing 2a [Source:ZFIN%3BAcc:ZDB-GENE-030131-6321]	-	-	GO:0008270:zinc ion binding;
ENSDARG00000005972	2937	453	10.67	441	10.79	495	10.51	698	13.22	18	15287065	15329471	-	ric8b	RIC8 guanine nucleotide exchange factor B [Source:NCBI gene%3BAcc:334503]	GO:0070285:pigment cell development;	GO:0005737:cytoplasm;	GO:0005085:guanyl-nucleotide exchange factor activity;
ENSDARG00000005980	3660	813	15.37	695	13.64	833	14.19	1015	15.43	21	15125497	15282452	-	sfswap	splicing factor SWAP [Source:ZFIN%3BAcc:ZDB-GENE-040426-931]	-	-	-
ENSDARG00000005989	4786	1158	16.74	1150	17.26	1097	14.29	1372	15.95	8	19283143	19342111	-	rgl1	ral guanine nucleotide dissociation stimulator-like 1 [Source:NCBI gene%3BAcc:402933]	GO:0051056:regulation of small GTPase mediated signal transduction;	GO:0005622:intracellular;	GO:0005085:guanyl-nucleotide exchange factor activity;
ENSDARG00000005993	2391	704	20.37	675	20.28	745	19.42	788	18.33	7	50353297	50367642	-	prc1b	protein regulator of cytokinesis 1b [Source:ZFIN%3BAcc:ZDB-GENE-040426-777]	GO:0000226:microtubule cytoskeleton organization;GO:0000910:cytokinesis;	-	GO:0008017:microtubule binding;
ENSDARG00000006003	2174	780	24.82	780	25.77	910	26.09	1015	25.97	13	35904335	35908275	-	mycla	MYCL proto-oncogene%2C bHLH transcription factor a [Source:NCBI gene%3BAcc:405873]	GO:0006355:regulation of transcription, DNA-templated;	GO:0005634:nucleus;	GO:0003700:sequence-specific DNA binding transcription factor activity;GO:0003677:DNA binding;GO:0046983:protein dimerization activity;
ENSDARG00000006008	2180	341	10.82	314	10.35	340	9.72	519	13.24	9	53327332	53352682	+	dct	dopachrome tautomerase [Source:ZFIN%3BAcc:ZDB-GENE-000508-1]	GO:0008152:metabolic process;	-	GO:0046872:metal ion binding;GO:0016491:oxidoreductase activity;
ENSDARG00000006010	2655	676	17.61	785	21.24	838	19.67	908	19.02	24	17260001	17267235	+	bmi1a	bmi1 polycomb ring finger oncogene 1a [Source:NCBI gene%3BAcc:321505]	GO:0016568:chromatin modification;GO:0006355:regulation of transcription, DNA-templated;GO:0021549:cerebellum development;	GO:0031519:PcG protein complex;	GO:0008270:zinc ion binding;
ENSDARG00000006011	3649	13	0.25	24	0.47	29	0.5	21	0.32	4	17634311	17642168	-	klhl42	kelch-like family%2C member 42 [Source:ZFIN%3BAcc:ZDB-GENE-041210-190]	-	-	-
ENSDARG00000006019	3022	11803	270.19	10757	255.68	13252	273.34	15595	287.04	23	20113378	20126257	-	tktb	transketolase b [Source:ZFIN%3BAcc:ZDB-GENE-030909-13]	GO:0008152:metabolic process;	-	GO:0004802:transketolase activity;
ENSDARG00000006025	4934	172	2.41	146	2.13	119	1.5	156	1.76	18	27439680	27570030	+	tp53i11b	tumor protein p53 inducible protein 11b [Source:ZFIN%3BAcc:ZDB-GENE-030131-6328]	-	-	-
ENSDARG00000006029	2183	660	20.92	615	20.24	749	21.39	767	19.54	4	7653607	7673165	-	lta4h	leukotriene A4 hydrolase [Source:ZFIN%3BAcc:ZDB-GENE-040426-2477]	GO:0006954:inflammatory response;GO:0019370:leukotriene biosynthetic process;GO:0006508:proteolysis;	-	GO:0004463:leukotriene-A4 hydrolase activity;GO:0008270:zinc ion binding;GO:0008237:metallopeptidase activity;
ENSDARG00000006031	6209	333	3.71	316	3.66	456	4.58	480	4.3	3	27832500	27880229	-	abat	4-aminobutyrate aminotransferase [Source:ZFIN%3BAcc:ZDB-GENE-031006-4]	-	-	-
ENSDARG00000006038	2814	653	16.05	702	17.92	753	16.68	1005	19.87	4	2923199	2945306	-	aebp2	AE binding protein 2 [Source:NCBI gene%3BAcc:406815]	-	-	-
ENSDARG00000006040	1751	1041	41.13	1006	41.27	1213	43.18	1260	40.03	6	9952678	9969458	+	cyp20a1	cytochrome P450%2C family 20%2C subfamily A%2C polypeptide 1 [Source:ZFIN%3BAcc:ZDB-GENE-040426-2646]	GO:0055114:oxidation-reduction process;	-	GO:0020037:heme binding;GO:0016705:oxidoreductase activity, acting on paired donors, with incorporation or reduction of molecular oxygen;GO:0005506:iron ion binding;GO:0009055:electron carrier activity;
ENSDARG00000006044	2904	93	2.22	96	2.37	177	3.8	153	2.93	20	31309364	31427390	-	usta	uronyl 2-sulfotransferase a [Source:ZFIN%3BAcc:ZDB-GENE-041001-163]	-	GO:0016021:integral component of membrane;	GO:0008146:sulfotransferase activity;
ENSDARG00000006052	3148	36	0.79	34	0.78	25	0.5	42	0.74	22	15706062	15717897	-	malt2	MALT paracaspase 2 [Source:ZFIN%3BAcc:ZDB-GENE-020801-2]	GO:0006508:proteolysis;	-	GO:0004197:cysteine-type endopeptidase activity;
ENSDARG00000006060	9736	810	5.76	700	5.16	904	5.79	1055	6.03	4	861444	890220	-	crybg1b	crystallin beta-gamma domain containing 1b [Source:ZFIN%3BAcc:ZDB-GENE-030131-7179]	-	-	-
ENSDARG00000006062	6881	2009	20.2	1931	20.16	2214	20.06	2658	21.49	15	30836981	30857350	-	akap1b	A kinase (PRKA) anchor protein 1b [Source:ZFIN%3BAcc:ZDB-GENE-030131-6844]	-	-	GO:0003723:RNA binding;
ENSDARG00000006065	1918	32	1.15	27	1.01	15	0.49	42	1.22	9	43243212	43538328	-	znf385b	zinc finger protein 385B [Source:NCBI gene%3BAcc:368405]	-	GO:0005634:nucleus;	GO:0003676:nucleic acid binding;GO:0008270:zinc ion binding;
ENSDARG00000006074	3918	543	9.59	573	10.5	591	9.4	652	9.26	8	21114338	21133119	+	uck2a	uridine-cytidine kinase 2a [Source:NCBI gene%3BAcc:100005763]	GO:0016310:phosphorylation;	-	GO:0016773:phosphotransferase activity, alcohol group as acceptor;GO:0004849:uridine kinase activity;GO:0005524:ATP binding;
ENSDARG00000006079	1485	27	1.26	22	1.06	33	1.39	19	0.71	22	696931	701105	+	gpr37l1a	G protein-coupled receptor 37 like 1a [Source:ZFIN%3BAcc:ZDB-GENE-110411-20]	-	-	-
ENSDARG00000006092	3111	8959	199.22	9041	208.74	9856	197.48	12141	217.07	16	48409066	48430272	-	rad21a	RAD21 cohesin complex component a [Source:NCBI gene%3BAcc:322275]	GO:0006357:regulation of transcription from RNA polymerase II promoter;GO:0007064:mitotic sister chromatid cohesion;GO:0043280:positive regulation of cysteine-type endopeptidase activity involved in apoptotic process;	GO:0000228:nuclear chromosome;	GO:0043565:sequence-specific DNA binding;
ENSDARG00000006093	2115	9	0.29	9	0.31	14	0.41	10	0.26	6	9747108	9792004	-	cdk15	cyclin-dependent kinase 15 [Source:NCBI gene%3BAcc:791619]	GO:0006468:protein phosphorylation;	-	GO:0046872:metal ion binding;GO:0004693:cyclin-dependent protein serine/threonine kinase activity;GO:0005524:ATP binding;
ENSDARG00000006094	7969	589	5.11	447	4.03	594	4.65	898	6.27	20	42563618	42660656	+	igf2r	insulin-like growth factor 2 receptor [Source:ZFIN%3BAcc:ZDB-GENE-041014-300]	GO:0006810:transport;	GO:0005737:cytoplasm;GO:0016021:integral component of membrane;	GO:0005215:transporter activity;
ENSDARG00000006109	1009	4	0.27	2	0.14	8	0.49	1	0.06	8	47817454	47819141	+	pimr185	Pim proto-oncogene%2C serine/threonine kinase%2C related 185 [Source:ZFIN%3BAcc:ZDB-GENE-081104-450]	-	-	-
ENSDARG00000006110	4558	115	1.75	142	2.24	115	1.57	118	1.44	15	46790676	46828958	-	chrd	chordin [Source:NCBI gene%3BAcc:30161]	GO:0035143:caudal fin morphogenesis;GO:0030514:negative regulation of BMP signaling pathway;GO:0048264:determination of ventral identity;GO:0043049:otic placode formation;GO:0035162:embryonic hemopoiesis;GO:0010159:specification of organ position;GO:0070121:Kupffer's vesicle development;GO:0001947:heart looping;GO:0060030:dorsal convergence;GO:0009948:anterior/posterior axis specification;GO:2000…	GO:0005576:extracellular region;	GO:0005515:protein binding;
ENSDARG00000006112	6668	486	5.04	462	4.98	585	5.47	718	5.99	12	10517473	10567188	-	myof	myoferlin [Source:ZFIN%3BAcc:ZDB-GENE-040426-1138]	-	-	-
ENSDARG00000006120	2616	650	17.19	573	15.73	651	15.51	917	19.5	15	27364394	27371340	+	tbx2b	T-box transcription factor 2b [Source:NCBI gene%3BAcc:30253]	GO:0007155:cell adhesion;GO:0008016:regulation of heart contraction;GO:0006355:regulation of transcription, DNA-templated;GO:0042074:cell migration involved in gastrulation;GO:0046548:retinal rod cell development;GO:0008283:cell proliferation;GO:0046549:retinal cone cell development;GO:0030903:notochord development;GO:0048318:axial mesoderm development;GO:0001947:heart looping;GO:0043704:photorec…	GO:0005634:nucleus;	GO:0003677:DNA binding;GO:0003700:sequence-specific DNA binding transcription factor activity;
ENSDARG00000006124	6384	4459	48.32	4142	46.6	4605	44.96	6075	52.93	8	36983559	37026607	+	kdm5c	lysine (K)-specific demethylase 5C [Source:ZFIN%3BAcc:ZDB-GENE-060810-94]	GO:0043524:negative regulation of neuron apoptotic process;GO:0055114:oxidation-reduction process;	GO:0005634:nucleus;	GO:0003677:DNA binding;GO:0016706:oxidoreductase activity, acting on paired donors, with incorporation or reduction of molecular oxygen, 2-oxoglutarate as one donor, and incorporation of one atom each of oxygen into both donors;GO:0008270:zinc ion binding;
ENSDARG00000006125	3081	1547	34.74	1538	35.86	1636	33.1	1845	33.31	12	33320504	33336787	+	csnk1db	casein kinase 1%2C delta b [Source:NCBI gene%3BAcc:406533]	-	-	-
ENSDARG00000006128	7933	896	7.81	883	7.99	1000	7.86	1247	8.74	13	10980755	11072964	-	cep170aa	centrosomal protein 170Aa [Source:NCBI gene%3BAcc:557463]	-	-	-
ENSDARG00000006137	1378	1	0.05	1	0.05	1	0.05	0	0	8	44703854	44707937	+	star	steroidogenic acute regulatory protein [Source:NCBI gene%3BAcc:63999]	GO:0006694:steroid biosynthetic process;GO:0006869:lipid transport;	GO:0005739:mitochondrion;	GO:0017127:cholesterol transporter activity;GO:0015485:cholesterol binding;
ENSDARG00000006151	3085	8	0.18	8	0.19	10	0.2	23	0.41	16	21144669	21185778	-	pde11al	phosphodiesterase 11a%2C like [Source:ZFIN%3BAcc:ZDB-GENE-031118-106]	-	-	-
ENSDARG00000006169	9170	221	1.67	198	1.55	229	1.56	339	2.06	25	35603107	35664817	-	lrrk2	leucine-rich repeat kinase 2 [Source:ZFIN%3BAcc:ZDB-GENE-071218-6]	GO:0006468:protein phosphorylation;GO:0007264:small GTPase mediated signal transduction;	GO:0005622:intracellular;	GO:0005525:GTP binding;GO:0005524:ATP binding;GO:0004674:protein serine/threonine kinase activity;
ENSDARG00000006174	1636	17	0.72	12	0.53	18	0.69	24	0.82	23	20127883	20133994	-	lrrc23	leucine rich repeat containing 23 [Source:ZFIN%3BAcc:ZDB-GENE-041010-153]	-	-	-
ENSDARG00000006181	2233	5	0.15	5	0.16	18	0.5	17	0.42	13	31757331	31783663	+	hif1aa	hypoxia inducible factor 1 subunit alpha a [Source:ZFIN%3BAcc:ZDB-GENE-080917-55]	-	-	-
ENSDARG00000006192	8585	1180	9.51	1181	9.88	1215	8.82	1549	10.04	22	18315490	18387919	+	gatad2ab	GATA zinc finger domain containing 2Ab [Source:ZFIN%3BAcc:ZDB-GENE-040426-2372]	GO:0006355:regulation of transcription, DNA-templated;	-	GO:0003700:sequence-specific DNA binding transcription factor activity;GO:0043565:sequence-specific DNA binding;GO:0008270:zinc ion binding;
ENSDARG00000006196	2282	625	18.95	581	18.29	628	17.15	754	18.38	13	36787077	36798204	-	sav1	salvador family WW domain containing protein 1 [Source:ZFIN%3BAcc:ZDB-GENE-040912-28]	-	-	-
ENSDARG00000006200	10190	9743	66.14	9303	65.58	11078	67.77	13637	74.44	2	16798652	16842699	+	eif4g1a	eukaryotic translation initiation factor 4 gamma%2C 1a [Source:ZFIN%3BAcc:ZDB-GENE-070112-702]	GO:0016070:RNA metabolic process;	-	GO:0003676:nucleic acid binding;GO:0003723:RNA binding;GO:0003677:DNA binding;
ENSDARG00000006202	6761	669	6.85	621	6.6	691	6.37	828	6.81	6	7466223	7531427	+	erbb3a	erb-b2 receptor tyrosine kinase 3a [Source:ZFIN%3BAcc:ZDB-GENE-030916-3]	GO:0006468:protein phosphorylation;GO:0007169:transmembrane receptor protein tyrosine kinase signaling pathway;	GO:0016021:integral component of membrane;	GO:0004716:receptor signaling protein tyrosine kinase activity;GO:0005524:ATP binding;GO:0004714:transmembrane receptor protein tyrosine kinase activity;
ENSDARG00000006206	996	5	0.35	3	0.22	2	0.13	0	0	9	54290896	54292162	+	pou4f3	POU class 4 homeobox 3 [Source:NCBI gene%3BAcc:30534]	GO:0006355:regulation of transcription, DNA-templated;GO:0007420:brain development;	GO:0005634:nucleus;	GO:0043565:sequence-specific DNA binding;GO:0003700:sequence-specific DNA binding transcription factor activity;
ENSDARG00000006207	866	21	1.68	15	1.24	35	2.52	41	2.63	6	42338309	42341219	+	gpx1b	glutathione peroxidase 1b [Source:ZFIN%3BAcc:ZDB-GENE-040912-60]	-	-	-
ENSDARG00000006215	5581	360	4.46	325	4.18	420	4.69	494	4.92	4	14899720	14910386	+	akr1b1.1	aldo-keto reductase family 1%2C member B1 (aldose reductase)%2C tandem duplicate 1 [Source:ZFIN%3BAcc:ZDB-GENE-040625-7]	-	-	-
ENSDARG00000006219	2169	1996	63.66	1976	65.44	2236	64.26	2575	66.03	11	3959495	3971035	+	gnl3	guanine nucleotide binding protein-like 3 (nucleolar) [Source:NCBI gene%3BAcc:321897]	GO:0042127:regulation of cell proliferation;GO:0007096:regulation of exit from mitosis;GO:0045664:regulation of neuron differentiation;GO:0003407:neural retina development;GO:0042254:ribosome biogenesis;	GO:0005730:nucleolus;	GO:0005525:GTP binding;GO:0003924:GTPase activity;
ENSDARG00000006220	7969	89	0.77	72	0.65	79	0.62	87	0.61	9	9969987	10003782	-	ugt1a1	UDP glucuronosyltransferase 1 family%2C polypeptide A1 [Source:ZFIN%3BAcc:ZDB-GENE-071004-4]	GO:0008152:metabolic process;	-	GO:0016787:hydrolase activity;GO:0016758:transferase activity, transferring hexosyl groups;
ENSDARG00000006225	1745	4865	192.87	5274	217.09	5243	187.29	5870	187.11	1	45205920	45215343	-	ddx39aa	DEAD (Asp-Glu-Ala-Asp) box polypeptide 39Aa [Source:ZFIN%3BAcc:ZDB-GENE-030131-4275]	-	-	GO:0003676:nucleic acid binding;GO:0005524:ATP binding;GO:0008026:ATP-dependent helicase activity;
ENSDARG00000006235	2311	558	16.7	620	19.27	657	17.72	689	16.58	17	12753579	12764360	-	brms1la	BRMS1 like transcriptional repressor a [Source:NCBI gene%3BAcc:792017]	GO:0006355:regulation of transcription, DNA-templated;	GO:0005634:nucleus;	-
ENSDARG00000006240	2906	399	9.5	417	10.31	455	9.76	567	10.85	3	52545014	52603683	+	slc27a1a	solute carrier family 27 member 1a [Source:ZFIN%3BAcc:ZDB-GENE-050320-112]	GO:0008152:metabolic process;	-	GO:0003824:catalytic activity;
ENSDARG00000006242	2498	3002	83.14	3070	88.28	3341	83.37	3768	83.9	11	11267493	11274919	+	ptp4a1	protein tyrosine phosphatase 4A1 [Source:ZFIN%3BAcc:ZDB-GENE-041121-11]	GO:0006470:protein dephosphorylation;	-	GO:0008138:protein tyrosine/serine/threonine phosphatase activity;
ENSDARG00000006251	4266	1134	18.39	1045	17.59	1170	17.1	1371	17.88	21	11749097	11774964	+	ell2	elongation factor%2C RNA polymerase II%2C 2 [Source:ZFIN%3BAcc:ZDB-GENE-030131-1717]	GO:0006368:transcription elongation from RNA polymerase II promoter;	GO:0008023:transcription elongation factor complex;	-
ENSDARG00000006253	2321	385	11.48	413	12.78	465	12.49	503	12.05	10	2695464	2713240	-	mier3a	mesoderm induction early response 1%2C family member 3 a [Source:ZFIN%3BAcc:ZDB-GENE-050913-97]	-	GO:0005634:nucleus;	GO:0003677:DNA binding;GO:0003682:chromatin binding;
ENSDARG00000006257	4732	256	3.74	248	3.76	282	3.71	263	3.09	10	15255012	15305767	+	vldlr	very low density lipoprotein receptor [Source:ZFIN%3BAcc:ZDB-GENE-040426-803]	-	-	-
ENSDARG00000006260	1709	27770	1124.12	29710	1248.69	30089	1097.46	31263	1017.5	6	6972953	6976107	-	tuba8l4	tubulin%2C alpha 8 like 4 [Source:ZFIN%3BAcc:ZDB-GENE-040426-860]	GO:0051258:protein polymerization;GO:0007017:microtubule-based process;	GO:0005874:microtubule;GO:0005737:cytoplasm;	GO:0003924:GTPase activity;GO:0005200:structural constituent of cytoskeleton;GO:0005525:GTP binding;
ENSDARG00000006266	4430	112	1.75	150	2.43	177	2.49	184	2.31	22	12798569	12826962	+	stat1a	signal transducer and activator of transcription 1a [Source:ZFIN%3BAcc:ZDB-GENE-980526-499]	GO:0006355:regulation of transcription, DNA-templated;GO:0007165:signal transduction;	GO:0005634:nucleus;	GO:0005509:calcium ion binding;GO:0004871:signal transducer activity;GO:0003700:sequence-specific DNA binding transcription factor activity;
ENSDARG00000006272	3052	814	18.45	743	17.49	847	17.3	1178	21.47	17	34186632	34239514	+	mpp5a	membrane protein%2C palmitoylated 5a (MAGUK p55 subfamily member 5) [Source:NCBI gene%3BAcc:252845]	GO:0008078:mesodermal cell migration;GO:0045176:apical protein localization;GO:0016337:single organismal cell-cell adhesion;GO:0021744:dorsal motor nucleus of vagus nerve development;GO:0001841:neural tube formation;GO:0002011:morphogenesis of an epithelial sheet;GO:0060059:embryonic retina morphogenesis in camera-type eye;GO:0045199:maintenance of epithelial cell apical/basal polarity;GO:0016332…	GO:0005923:bicellular tight junction;GO:0001917:photoreceptor inner segment;GO:0016324:apical plasma membrane;GO:0031226:intrinsic component of plasma membrane;GO:0005634:nucleus;	-
ENSDARG00000006279	2669	61	1.58	43	1.16	64	1.49	111	2.31	17	15788100	15820304	+	rragd	ras-related GTP binding D [Source:ZFIN%3BAcc:ZDB-GENE-070620-6]	-	GO:0005737:cytoplasm;GO:0005634:nucleus;	GO:0005525:GTP binding;
ENSDARG00000006283	2805	478	11.79	450	11.52	508	11.29	601	11.92	4	4079418	4111767	+	waslb	WASP like actin nucleation promoting factor b [Source:ZFIN%3BAcc:ZDB-GENE-040426-718]	GO:0006461:protein complex assembly;GO:0008154:actin polymerization or depolymerization;	GO:0015629:actin cytoskeleton;	GO:0003779:actin binding;
ENSDARG00000006288	3185	126	2.74	128	2.89	97	1.9	100	1.75	23	1926562	2037659	-	prdm5	PR domain containing 5 [Source:ZFIN%3BAcc:ZDB-GENE-040708-1]	GO:0006355:regulation of transcription, DNA-templated;GO:0060828:regulation of canonical Wnt signaling pathway;GO:2000050:regulation of non-canonical Wnt signaling pathway;	GO:0005622:intracellular;	GO:0008270:zinc ion binding;GO:0000976:transcription regulatory region sequence-specific DNA binding;
ENSDARG00000006290	542	934	119.21	979	129.74	1072	123.29	1355	139.06	19	35357196	35361556	-	ndufs5	NADH:ubiquinone oxidoreductase subunit S5 [Source:ZFIN%3BAcc:ZDB-GENE-050522-437]	-	-	-
ENSDARG00000006292	5854	28	0.33	23	0.28	24	0.26	30	0.29	9	9441453	9501931	+	maats1	MYCBP-associated%2C testis expressed 1 [Source:ZFIN%3BAcc:ZDB-GENE-070912-489]	-	-	-
ENSDARG00000006299	8448	338	2.77	369	3.14	403	2.97	507	3.34	9	21535885	21570566	+	arhgef7a	Rho guanine nucleotide exchange factor (GEF) 7a [Source:ZFIN%3BAcc:ZDB-GENE-060322-11]	GO:0035023:regulation of Rho protein signal transduction;	GO:0005622:intracellular;	GO:0005089:Rho guanyl-nucleotide exchange factor activity;GO:0005543:phospholipid binding;
ENSDARG00000006300	950	271	19.73	307	23.21	301	19.75	282	16.51	7	72003301	72011167	+	psmd9	proteasome 26S subunit%2C non-ATPase 9 [Source:ZFIN%3BAcc:ZDB-GENE-030131-431]	-	-	-
ENSDARG00000006301	4950	589	8.23	522	7.57	667	8.4	803	9.02	9	13814963	13963078	-	wu:fj59g11	wu:fj59g11 [Source:ZFIN%3BAcc:ZDB-GENE-030131-8202]	-	-	-
ENSDARG00000006307	5176	102	1.36	59	0.82	91	1.1	117	1.26	11	24877820	24888595	+	shisa4	shisa family member 4 [Source:ZFIN%3BAcc:ZDB-GENE-050417-419]	-	-	-
ENSDARG00000006308	2453	26	0.73	20	0.59	29	0.74	17	0.39	8	9641252	9684872	-	ptpn18	protein tyrosine phosphatase non-receptor type 18 [Source:ZFIN%3BAcc:ZDB-GENE-050320-12]	GO:0006470:protein dephosphorylation;	-	GO:0004725:protein tyrosine phosphatase activity;
ENSDARG00000006314	5012	1402	19.35	1232	17.66	1550	19.28	1823	20.23	9	11597500	11655031	-	itgav	integrin%2C alpha V [Source:ZFIN%3BAcc:ZDB-GENE-060616-382]	GO:0001525:angiogenesis;GO:0007229:integrin-mediated signaling pathway;GO:0007155:cell adhesion;GO:0042074:cell migration involved in gastrulation;GO:0070121:Kupffer's vesicle development;GO:0001935:endothelial cell proliferation;	GO:0008305:integrin complex;	GO:0005515:protein binding;
ENSDARG00000006316	1312	25549	1347.16	25650	1404.25	28721	1364.55	32018	1357.4	21	26071874	26074640	+	rpl23a	ribosomal protein L23a [Source:ZFIN%3BAcc:ZDB-GENE-030131-7479]	GO:0051726:regulation of cell cycle;GO:0006412:translation;	GO:0005840:ribosome;	GO:0003735:structural constituent of ribosome;GO:0000166:nucleotide binding;
ENSDARG00000006332	3419	431	8.72	401	8.42	465	8.48	578	9.4	20	851583	894374	-	snx14	sorting nexin 14 [Source:NCBI gene%3BAcc:555970]	GO:0038032:termination of G-protein coupled receptor signaling pathway;	-	GO:0035091:phosphatidylinositol binding;
ENSDARG00000006341	2555	1	0.03	2	0.06	0	0	4	0.09	11	40731602	40742507	-	tas1r3	taste receptor%2C type 1%2C member 3 [Source:ZFIN%3BAcc:ZDB-GENE-070917-3]	GO:0007186:G-protein coupled receptor signaling pathway;	GO:0016021:integral component of membrane;GO:0005886:plasma membrane;	GO:0004930:G-protein coupled receptor activity;
ENSDARG00000006345	1240	314	17.52	228	13.21	304	15.28	367	16.46	15	436776	446010	+	med17	mediator complex subunit 17 [Source:NCBI gene%3BAcc:567560]	GO:0006357:regulation of transcription from RNA polymerase II promoter;	GO:0016592:mediator complex;	GO:0001104:RNA polymerase II transcription cofactor activity;
ENSDARG00000006350	3319	42	0.88	50	1.08	88	1.65	92	1.54	13	40770628	40775530	+	nkx1.2la	NK1 transcription factor related 2-like%2Ca [Source:ZFIN%3BAcc:ZDB-GENE-040615-1]	GO:0006355:regulation of transcription, DNA-templated;	GO:0005634:nucleus;	GO:0003700:sequence-specific DNA binding transcription factor activity;GO:0043565:sequence-specific DNA binding;
ENSDARG00000006353	5776	431	5.16	455	5.66	678	7.32	721	6.94	23	33447625	33558161	-	itga5	integrin%2C alpha 5 (fibronectin receptor%2C alpha polypeptide) [Source:ZFIN%3BAcc:ZDB-GENE-031116-52]	GO:0085029:extracellular matrix assembly;GO:0001501:skeletal system development;GO:0007229:integrin-mediated signaling pathway;GO:0007155:cell adhesion;GO:0001756:somitogenesis;	GO:0008305:integrin complex;	GO:0046982:protein heterodimerization activity;GO:0001968:fibronectin binding;
ENSDARG00000006356	2406	104	2.99	85	2.54	125	3.24	149	3.44	13	29422049	29424454	-	slc18a3a	solute carrier family 18 member 3a [Source:NCBI gene%3BAcc:559347]	GO:0015893:drug transport;GO:0006836:neurotransmitter transport;GO:0055085:transmembrane transport;	GO:0016021:integral component of membrane;	GO:0015238:drug transmembrane transporter activity;
ENSDARG00000006368	1734	42	1.68	41	1.7	42	1.51	63	2.02	22	21152847	21165192	+	crlf1b	cytokine receptor-like factor 1b [Source:ZFIN%3BAcc:ZDB-GENE-080108-1]	-	-	-
ENSDARG00000006370	2151	745	23.96	705	23.54	858	24.86	842	21.77	2	30786773	30846927	+	atp6v1h	ATPase H+ transporting V1 subunit H [Source:ZFIN%3BAcc:ZDB-GENE-021219-2]	GO:0060041:retina development in camera-type eye;GO:0015991:ATP hydrolysis coupled proton transport;	GO:0000221:vacuolar proton-transporting V-type ATPase, V1 domain;	GO:0046961:proton-transporting ATPase activity, rotational mechanism;
ENSDARG00000006372	1872	1	0.04	0	0	3	0.1	2	0.06	18	40462445	40469527	+	ugt5c2	UDP glucuronosyltransferase 5 family%2C polypeptide C2 [Source:ZFIN%3BAcc:ZDB-GENE-060825-206]	GO:0008152:metabolic process;	-	GO:0016758:transferase activity, transferring hexosyl groups;
ENSDARG00000006383	4941	23	0.32	13	0.19	27	0.34	44	0.5	9	27415754	27649406	-	stxbp5l	syntaxin binding protein 5-like [Source:NCBI gene%3BAcc:567605]	-	-	-
ENSDARG00000006385	2348	254	7.48	240	7.34	248	6.58	288	6.82	3	1167026	1180520	+	triobpb	TRIO and F-actin binding protein b [Source:ZFIN%3BAcc:ZDB-GENE-061215-80]	-	-	GO:0005543:phospholipid binding;
ENSDARG00000006389	4051	500	8.54	485	8.6	588	9.05	583	8	10	14871136	14943281	-	smad2	SMAD family member 2 [Source:NCBI gene%3BAcc:30639]	GO:0009880:embryonic pattern specification;GO:0060282:positive regulation of oocyte development;GO:0007179:transforming growth factor beta receptor signaling pathway;GO:0045892:negative regulation of transcription, DNA-templated;GO:0035556:intracellular signal transduction;	GO:0005737:cytoplasm;GO:0005667:transcription factor complex;GO:0044424:intracellular part;	GO:0046872:metal ion binding;GO:0003677:DNA binding;GO:0003700:sequence-specific DNA binding transcription factor activity;
ENSDARG00000006392	1393	696	34.56	707	36.46	844	37.77	894	35.7	1	19083501	19092155	+	exosc9	exosome component 9 [Source:NCBI gene%3BAcc:450057]	-	-	-
ENSDARG00000006395	3331	2776	57.65	2778	59.9	3266	61.12	3879	64.77	20	51131933	51186565	-	rbm25b	RNA binding motif protein 25b [Source:ZFIN%3BAcc:ZDB-GENE-030131-5547]	GO:0006397:mRNA processing;	-	GO:0097159:organic cyclic compound binding;GO:1901363:heterocyclic compound binding;GO:0003676:nucleic acid binding;GO:0000166:nucleotide binding;
ENSDARG00000006396	4505	104	1.6	77	1.23	111	1.54	144	1.78	4	13696537	13728375	+	nrcama	neuronal cell adhesion molecule a [Source:ZFIN%3BAcc:ZDB-GENE-041210-235]	-	-	-
ENSDARG00000006397	2081	747	24.83	710	24.51	756	22.65	890	23.79	20	43775793	43786515	-	laptm4a	lysosomal protein transmembrane 4 alpha [Source:ZFIN%3BAcc:ZDB-GENE-030131-1024]	-	GO:0016021:integral component of membrane;	-
ENSDARG00000006399	1818	4699	178.81	4803	189.76	5764	197.63	6032	184.55	15	24746444	24754895	+	ywhae1	tyrosine 3-monooxygenase/tryptophan 5-monooxygenase activation protein%2C epsilon polypeptide 1 [Source:ZFIN%3BAcc:ZDB-GENE-030131-779]	GO:0001764:neuron migration;GO:0035308:negative regulation of protein dephosphorylation;GO:0021766:hippocampus development;GO:0006605:protein targeting;GO:0021987:cerebral cortex development;GO:0007165:signal transduction;	GO:0042470:melanosome;GO:0033267:axon part;GO:0005871:kinesin complex;GO:0005739:mitochondrion;	GO:0042826:histone deacetylase binding;GO:0050815:phosphoserine binding;GO:0019904:protein domain specific binding;GO:0008426:protein kinase C inhibitor activity;GO:0032403:protein complex binding;GO:0004497:monooxygenase activity;
ENSDARG00000006408	1599	1324	57.28	1283	57.63	1445	56.33	1583	55.07	21	34119759	34129776	+	hmgb3b	high mobility group box 3b [Source:ZFIN%3BAcc:ZDB-GENE-050417-290]	-	GO:0005634:nucleus;	GO:0003677:DNA binding;
ENSDARG00000006409	1695	587	23.96	601	25.47	745	27.4	735	24.12	4	5523690	5530441	+	mapk12b	mitogen-activated protein kinase 12b [Source:ZFIN%3BAcc:ZDB-GENE-041210-123]	GO:0006468:protein phosphorylation;	-	GO:0004707:MAP kinase activity;GO:0005524:ATP binding;
ENSDARG00000006413	1060	4009	261.64	4673	316.65	4003	235.4	3000	157.42	12	38556462	38561842	+	rpl38	ribosomal protein L38 [Source:ZFIN%3BAcc:ZDB-GENE-030131-8752]	GO:0006412:translation;	GO:0005840:ribosome;	GO:0003735:structural constituent of ribosome;
ENSDARG00000006420	7028	811	7.98	786	8.03	929	8.24	993	7.86	12	29842836	30032188	-	atrnl1b	attractin-like 1b [Source:ZFIN%3BAcc:ZDB-GENE-030131-8092]	-	-	-
ENSDARG00000006422	3184	363	7.89	323	7.29	403	7.89	520	9.08	9	23783856	23807032	-	esyt3	extended synaptotagmin-like protein 3 [Source:ZFIN%3BAcc:ZDB-GENE-050809-35]	-	-	-
ENSDARG00000006427	1337	12578	650.82	12933	694.8	15006	699.61	15534	646.25	1	25848231	25851575	+	fabp2	fatty acid binding protein 2%2C intestinal [Source:ZFIN%3BAcc:ZDB-GENE-991019-5]	GO:0006810:transport;	-	GO:0008289:lipid binding;GO:0005215:transporter activity;
ENSDARG00000006434	1908	684	24.8	708	26.65	836	27.31	957	27.9	1	19637312	19648227	-	polr1e	RNA polymerase I subunit E [Source:ZFIN%3BAcc:ZDB-GENE-050522-251]	GO:0006351:transcription, DNA-templated;	GO:0005634:nucleus;	GO:0003899:DNA-directed RNA polymerase activity;GO:0003677:DNA binding;
ENSDARG00000006447	2115	2	0.07	5	0.17	3	0.09	2	0.05	15	35139457	35156791	+	slc19a3a	solute carrier family 19 member 3a [Source:ZFIN%3BAcc:ZDB-GENE-110411-41]	-	-	-
ENSDARG00000006456	1402	77	3.8	57	2.92	56	2.49	47	1.86	14	30359124	30366196	-	pdgfrl	platelet-derived growth factor receptor-like [Source:ZFIN%3BAcc:ZDB-GENE-040426-901]	-	-	GO:0042802:identical protein binding;
ENSDARG00000006467	6292	410	4.51	426	4.86	415	4.11	569	5.03	9	53654866	53666031	-	pcdh8	protocadherin 8 [Source:ZFIN%3BAcc:ZDB-GENE-980526-242]	GO:0007156:homophilic cell adhesion via plasma membrane adhesion molecules;	GO:0016021:integral component of membrane;GO:0005886:plasma membrane;	GO:0005509:calcium ion binding;
ENSDARG00000006468	1829	10	0.38	5	0.2	6	0.2	5	0.15	3	29445473	29468859	+	grap2a	GRB2 related adaptor protein 2a [Source:ZFIN%3BAcc:ZDB-GENE-050417-275]	-	-	-
ENSDARG00000006474	1526	49	2.22	58	2.73	42	1.72	52	1.9	7	12371061	12380200	+	saxo2	stabilizer of axonemal microtubules 2 [Source:ZFIN%3BAcc:ZDB-GENE-051127-27]	-	-	-
ENSDARG00000006477	4199	1998	32.92	1914	32.74	2194	32.57	2519	33.37	6	40554551	40563509	+	ddi2	DNA-damage inducible protein 2 [Source:NCBI gene%3BAcc:386644]	GO:0006508:proteolysis;	-	GO:0004190:aspartic-type endopeptidase activity;
ENSDARG00000006487	2522	12310	337.67	11953	340.43	13693	338.44	14441	318.49	7	33345624	33351532	-	anp32a	acidic (leucine-rich) nuclear phosphoprotein 32 family%2C member A [Source:NCBI gene%3BAcc:335907]	GO:0006913:nucleocytoplasmic transport;	GO:0005783:endoplasmic reticulum;GO:0048471:perinuclear region of cytoplasm;GO:0005634:nucleus;	-
ENSDARG00000006491	2453	282	7.95	260	7.61	308	7.83	362	8.21	5	8919698	8957068	+	agpat9l	1-acylglycerol-3-phosphate O-acyltransferase 9%2C like [Source:NCBI gene%3BAcc:567414]	GO:0019432:triglyceride biosynthetic process;GO:0008654:phospholipid biosynthetic process;	GO:0005789:endoplasmic reticulum membrane;GO:0016021:integral component of membrane;	GO:0004366:glycerol-3-phosphate O-acyltransferase activity;
ENSDARG00000006494	5278	204	2.67	213	2.9	188	2.22	201	2.12	7	9840994	9873652	-	asb7	ankyrin repeat and SOCS box containing 7 [Source:ZFIN%3BAcc:ZDB-GENE-040426-2429]	GO:0035556:intracellular signal transduction;	-	-
ENSDARG00000006497	3972	1880	32.74	1895	34.27	2166	33.99	2210	30.95	13	31424586	31470439	-	rtn1a	reticulon 1a [Source:ZFIN%3BAcc:ZDB-GENE-030131-2426]	-	GO:0005783:endoplasmic reticulum;	-
ENSDARG00000006501	1741	3	0.12	1	0.04	1	0.04	1	0.03	7	51950614	51953850	-	cyp2x10.2	cytochrome P450%2C family 2%2C subfamily X%2C polypeptide 10.2 [Source:ZFIN%3BAcc:ZDB-GENE-060818-12]	GO:0055114:oxidation-reduction process;	-	GO:0020037:heme binding;GO:0016705:oxidoreductase activity, acting on paired donors, with incorporation or reduction of molecular oxygen;GO:0004497:monooxygenase activity;GO:0005506:iron ion binding;GO:0009055:electron carrier activity;
ENSDARG00000006508	2743	95	2.4	111	2.91	136	3.09	150	3.04	8	11234168	11324143	-	pip5k1bb	phosphatidylinositol-4-phosphate 5-kinase%2C type I%2C beta b [Source:ZFIN%3BAcc:ZDB-GENE-040912-141]	-	-	-
ENSDARG00000006514	1538	1075	48.35	1091	50.95	1235	50.05	1561	56.45	6	36551083	36552844	-	her6	hairy-related 6 [Source:ZFIN%3BAcc:ZDB-GENE-980526-144]	GO:0001757:somite specification;GO:0045664:regulation of neuron differentiation;GO:0006355:regulation of transcription, DNA-templated;GO:0021794:thalamus development;GO:0007219:Notch signaling pathway;	GO:0005634:nucleus;	GO:0003677:DNA binding;GO:0046983:protein dimerization activity;
ENSDARG00000006522	2060	0	0	0	0	0	0	0	0	3	56905103	56918442	+	otop2	otopetrin 2 [Source:ZFIN%3BAcc:ZDB-GENE-050104-2]	-	-	-
ENSDARG00000006524	6394	3832	41.46	3504	39.36	4067	39.65	5312	46.21	21	26028947	26058547	+	supt6h	SPT6 homolog%2C histone chaperone and transcription elongation factor [Source:NCBI gene%3BAcc:337866]	GO:0006357:regulation of transcription from RNA polymerase II promoter;GO:0071599:otic vesicle development;GO:0035050:embryonic heart tube development;GO:0032784:regulation of DNA-templated transcription, elongation;GO:0001756:somitogenesis;	GO:0005634:nucleus;	GO:0003723:RNA binding;GO:0016788:hydrolase activity, acting on ester bonds;
ENSDARG00000006526	9157	2602	19.66	2284	17.92	2557	17.41	3296	20.02	1	5504128	5543065	-	fn1b	fibronectin 1b [Source:ZFIN%3BAcc:ZDB-GENE-030131-6545]	GO:0001756:somitogenesis;	GO:0005576:extracellular region;	-
ENSDARG00000006527	3439	2429	48.86	2349	49.06	2657	48.16	3425	55.4	21	18266319	18275337	-	brd3a	bromodomain containing 3a [Source:ZFIN%3BAcc:ZDB-GENE-030131-6141]	-	-	-
ENSDARG00000006544	2173	0	0	0	0	0	0	2	0.05	6	214269	218882	-	c1qtnf6b	C1q and TNF related 6b [Source:ZFIN%3BAcc:ZDB-GENE-080411-1]	-	-	-
ENSDARG00000006545	6720	190	1.96	212	2.27	219	2.03	276	2.28	7	24627076	24645540	-	rgp1	GP1 homolog%2C RAB6A GEF complex partner 1 [Source:ZFIN%3BAcc:ZDB-GENE-040718-352]	-	-	-
ENSDARG00000006546	4493	207	3.19	243	3.88	275	3.82	259	3.21	6	31350101	31364551	-	ak4	adenylate kinase 4 [Source:ZFIN%3BAcc:ZDB-GENE-040426-2505]	GO:0046939:nucleotide phosphorylation;	-	GO:0004017:adenylate kinase activity;GO:0005524:ATP binding;
ENSDARG00000006553	2802	1117	27.58	1105	28.33	1200	26.7	1356	26.92	3	32410746	32416121	+	rras	RAS related [Source:ZFIN%3BAcc:ZDB-GENE-041010-217]	-	-	-
ENSDARG00000006560	1633	8	0.34	7	0.31	5	0.19	3	0.1	2	854444	879800	-	irf4a	interferon regulatory factor 4a [Source:ZFIN%3BAcc:ZDB-GENE-070912-330]	GO:0006355:regulation of transcription, DNA-templated;	-	GO:0003700:sequence-specific DNA binding transcription factor activity;GO:0000975:regulatory region DNA binding;
ENSDARG00000006566	4973	1475	20.52	1310	18.92	1524	19.1	1484	16.6	3	21066315	21094525	-	nlk1	nemo-like kinase%2C type 1 [Source:ZFIN%3BAcc:ZDB-GENE-040701-1]	GO:0006468:protein phosphorylation;GO:0030177:positive regulation of Wnt signaling pathway;	-	GO:0004707:MAP kinase activity;GO:0005524:ATP binding;
ENSDARG00000006567	1190	115	6.69	124	7.48	129	6.76	136	6.36	4	2637947	2642535	+	dus4l	dihydrouridine synthase 4-like (S. cerevisiae) [Source:ZFIN%3BAcc:ZDB-GENE-040801-233]	GO:0008033:tRNA processing;GO:0055114:oxidation-reduction process;	-	GO:0050660:flavin adenine dinucleotide binding;GO:0017150:tRNA dihydrouridine synthase activity;
ENSDARG00000006568	1182	2	0.12	2	0.12	4	0.21	3	0.14	2	7818368	7829400	+	kcnmb2	potassium large conductance calcium-activated channel%2C subfamily M%2C beta member 2 [Source:ZFIN%3BAcc:ZDB-GENE-050320-97]	GO:0006813:potassium ion transport;	GO:0016020:membrane;	GO:0015269:calcium-activated potassium channel activity;
ENSDARG00000006577	605	282	32.25	209	24.81	254	26.17	340	31.26	8	53051701	53062017	+	nadka	NAD kinase a [Source:ZFIN%3BAcc:ZDB-GENE-050417-39]	GO:0006741:NADP biosynthetic process;GO:0019674:NAD metabolic process;	-	GO:0003951:NAD+ kinase activity;
ENSDARG00000006580	777	2	0.18	4	0.37	5	0.4	2	0.14	21	25777425	25778201	+	cldnd	claudin d [Source:NCBI gene%3BAcc:81583]	GO:0016338:calcium-independent cell-cell adhesion via plasma membrane cell-adhesion molecules;	GO:0016021:integral component of membrane;GO:0005923:bicellular tight junction;GO:0005886:plasma membrane;	GO:0005198:structural molecule activity;GO:0042802:identical protein binding;
ENSDARG00000006584	5110	1298	17.57	1198	16.84	1452	17.71	1821	19.82	23	27591366	27608257	-	phf8	PHD finger protein 8 [Source:NCBI gene%3BAcc:566534]	GO:0007420:brain development;GO:0048703:embryonic viscerocranium morphogenesis;GO:0043523:regulation of neuron apoptotic process;	-	-
ENSDARG00000006585	5272	46	0.6	52	0.71	59	0.7	58	0.61	15	47883585	47895200	-	DMWD	zmp:0000000529 [Source:ZFIN%3BAcc:ZDB-GENE-130530-532]	-	-	-
ENSDARG00000006588	2242	476	14.69	598	19.16	366	10.18	564	13.99	1	45173421	45177401	-	zgc:111983	zgc:111983 [Source:ZFIN%3BAcc:ZDB-GENE-050417-335]	-	-	-
ENSDARG00000006598	1959	45	1.59	32	1.17	72	2.29	58	1.65	16	26530426	26537114	-	sgk2b	serum/glucocorticoid regulated kinase 2b [Source:ZFIN%3BAcc:ZDB-GENE-060929-44]	GO:0006468:protein phosphorylation;	-	GO:0005524:ATP binding;GO:0004674:protein serine/threonine kinase activity;
ENSDARG00000006600	3889	942	16.76	783	14.46	1011	16.2	1166	16.68	25	35889102	35909626	+	lsm14aa	LSM14A mRNA processing body assembly factor a [Source:ZFIN%3BAcc:ZDB-GENE-040426-1567]	-	-	-
ENSDARG00000006601	4797	155	2.24	138	2.07	174	2.26	218	2.53	11	25857941	26180714	-	kaznb	kazrin%2C periplakin interacting protein b [Source:ZFIN%3BAcc:ZDB-GENE-061215-31]	-	-	-
ENSDARG00000006602	2368	21	0.61	31	0.94	40	1.05	67	1.57	17	6079881	6101820	+	chrna2a	cholinergic receptor%2C nicotinic%2C alpha 2a (neuronal) [Source:ZFIN%3BAcc:ZDB-GENE-040108-2]	GO:0006811:ion transport;	GO:0045211:postsynaptic membrane;GO:0030054:cell junction;GO:0005892:acetylcholine-gated channel complex;	GO:0004889:acetylcholine-activated cation-selective channel activity;GO:0015464:acetylcholine receptor activity;
ENSDARG00000006603	2786	413	10.26	390	10.05	401	8.97	499	9.96	23	5765514	5818992	-	csrp1a	cysteine and glycine-rich protein 1a [Source:ZFIN%3BAcc:ZDB-GENE-030909-4]	GO:0060027:convergent extension involved in gastrulation;GO:0016055:Wnt signaling pathway;GO:0007254:JNK cascade;GO:0042074:cell migration involved in gastrulation;GO:0003007:heart morphogenesis;	GO:0005622:intracellular;	GO:0008270:zinc ion binding;GO:0046872:metal ion binding;
ENSDARG00000006604	2620	377	9.95	353	9.68	301	7.16	458	9.72	21	21448996	21515466	-	nectin3b	nectin cell adhesion molecule 3b [Source:NCBI gene%3BAcc:541491]	GO:0007155:cell adhesion;	GO:0005886:plasma membrane;GO:0016021:integral component of membrane;	-
ENSDARG00000006607	4113	29	0.49	16	0.28	37	0.56	30	0.41	6	43903209	43907321	+	gpr27	G protein-coupled receptor 27 [Source:ZFIN%3BAcc:ZDB-GENE-071022-3]	GO:0007186:G-protein coupled receptor signaling pathway;	GO:0016021:integral component of membrane;	GO:0004930:G-protein coupled receptor activity;
ENSDARG00000006609	3193	949	20.56	845	19.01	1048	20.46	1142	19.89	22	20388621	20403194	-	map2k2a	mitogen-activated protein kinase kinase 2a [Source:ZFIN%3BAcc:ZDB-GENE-041027-1]	GO:0006468:protein phosphorylation;	-	GO:0004713:protein tyrosine kinase activity;GO:0005524:ATP binding;GO:0004674:protein serine/threonine kinase activity;
ENSDARG00000006615	4167	330	5.48	277	4.77	402	6.01	496	6.62	15	15997149	16012963	-	hnf1ba	HNF1 homeobox Ba [Source:NCBI gene%3BAcc:792391]	GO:0031016:pancreas development;GO:0021575:hindbrain morphogenesis;GO:0048566:embryonic digestive tract development;GO:0032474:otolith morphogenesis;GO:0043049:otic placode formation;GO:0072576:liver morphogenesis;GO:0021664:rhombomere 5 morphogenesis;GO:0035622:intrahepatic bile duct development;GO:0035148:tube formation;GO:0048752:semicircular canal morphogenesis;GO:0009952:anterior/posterior p…	GO:0005634:nucleus;	GO:0046983:protein dimerization activity;GO:0043565:sequence-specific DNA binding;GO:0003700:sequence-specific DNA binding transcription factor activity;
ENSDARG00000006617	2526	252	6.9	253	7.19	265	6.54	295	6.5	24	947473	982443	-	napga	N-ethylmaleimide-sensitive factor attachment protein%2C gamma a [Source:ZFIN%3BAcc:ZDB-GENE-050320-46]	-	-	-
ENSDARG00000006621	2100	915	30.14	888	30.37	1095	32.5	1385	36.68	1	27808916	27861148	+	pspc1	paraspeckle component 1 [Source:NCBI gene%3BAcc:692285]	GO:0006355:regulation of transcription, DNA-templated;	GO:0016363:nuclear matrix;GO:0005730:nucleolus;GO:0016607:nuclear speck;GO:0005737:cytoplasm;	GO:0003723:RNA binding;GO:0000166:nucleotide binding;
ENSDARG00000006624	2347	1227	36.17	1210	37.03	1422	37.77	1971	46.71	10	18877362	18906672	+	ppp2r2ab	protein phosphatase 2%2C regulatory subunit B%2C alpha b [Source:ZFIN%3BAcc:ZDB-GENE-030131-5474]	GO:0010458:exit from mitosis;GO:0007067:mitotic nuclear division;GO:0007165:signal transduction;GO:0051301:cell division;	GO:0005737:cytoplasm;GO:0000159:protein phosphatase type 2A complex;	GO:0008601:protein phosphatase type 2A regulator activity;
ENSDARG00000006636	3032	15	0.34	11	0.26	7	0.14	9	0.17	14	19258702	19261733	+	slitrk2	SLIT and NTRK-like family%2C member 2 [Source:ZFIN%3BAcc:ZDB-GENE-080327-7]	-	-	-
ENSDARG00000006639	5218	229	3.04	218	3	265	3.17	264	2.81	6	10836147	10863669	-	lnpk	lunapark%2C ER junction formation factor [Source:NCBI gene%3BAcc:337509]	-	GO:0016021:integral component of membrane;	-
ENSDARG00000006640	2875	208	5	182	4.55	210	4.55	251	4.86	19	860830	874888	-	eomesa	eomesodermin homolog a [Source:ZFIN%3BAcc:ZDB-GENE-001228-1]	-	-	-
ENSDARG00000006642	2163	832	26.61	929	30.85	1029	29.65	1032	26.54	3	40153819	40162867	-	drg2	developmentally regulated GTP binding protein 2 [Source:ZFIN%3BAcc:ZDB-GENE-040808-29]	-	-	GO:0005525:GTP binding;GO:0000166:nucleotide binding;
ENSDARG00000006666	1782	181	7.03	201	8.1	230	8.05	222	6.93	21	22697059	22705347	+	bud13	BUD13 homolog [Source:ZFIN%3BAcc:ZDB-GENE-030131-6333]	-	-	-
ENSDARG00000006672	2972	682	15.87	773	18.68	769	16.13	939	17.57	20	35255403	35298023	+	fam49a	family with sequence similarity 49 member A [Source:ZFIN%3BAcc:ZDB-GENE-031002-50]	-	-	-
ENSDARG00000006677	2194	119	3.75	100	3.27	137	3.89	205	5.2	2	904362	920580	+	ripk1l	receptor (TNFRSF)-interacting serine-threonine kinase 1%2C like [Source:ZFIN%3BAcc:ZDB-GENE-070705-132]	-	-	-
ENSDARG00000006678	2871	9	0.22	5	0.13	12	0.26	17	0.33	9	29122039	29321665	-	pth2ra	parathyroid hormone 2 receptor a [Source:ZFIN%3BAcc:ZDB-GENE-991123-10]	GO:0006171:cAMP biosynthetic process;GO:0007186:G-protein coupled receptor signaling pathway;	GO:0016021:integral component of membrane;GO:0005886:plasma membrane;	GO:0004930:G-protein coupled receptor activity;GO:0001653:peptide receptor activity;
ENSDARG00000006683	6858	435	4.39	377	3.95	480	4.36	560	4.54	14	31799787	31856819	-	arhgef6	Rac/Cdc42 guanine nucleotide exchange factor (GEF) 6 [Source:ZFIN%3BAcc:ZDB-GENE-101013-2]	-	-	-
ENSDARG00000006691	1570	32029	1411.31	31826	1456.04	33315	1322.71	30219	1070.6	5	32882688	32887020	+	rpl12	ribosomal protein L12 [Source:ZFIN%3BAcc:ZDB-GENE-030131-5297]	GO:0006412:translation;	GO:0005840:ribosome;	GO:0003735:structural constituent of ribosome;
ENSDARG00000006712	3031	368	8.4	304	7.2	290	5.96	423	7.76	19	5604241	5621298	+	wipf2b	WAS/WASL interacting protein family%2C member 2b [Source:ZFIN%3BAcc:ZDB-GENE-040625-182]	-	-	-
ENSDARG00000006719	7167	920	8.88	824	8.26	983	8.55	1090	8.46	8	30600386	30664631	+	specc1la	sperm antigen with calponin homology and coiled-coil domains 1-like a [Source:NCBI gene%3BAcc:561775]	GO:0007049:cell cycle;GO:0051301:cell division;	GO:0005737:cytoplasm;GO:0005819:spindle;GO:0005921:gap junction;	-
ENSDARG00000006747	10605	39	0.25	57	0.39	66	0.39	89	0.47	4	12111154	12239160	+	tmem178b	transmembrane protein 178B [Source:NCBI gene%3BAcc:436669]	-	GO:0005923:bicellular tight junction;GO:0016021:integral component of membrane;	GO:0005198:structural molecule activity;
ENSDARG00000006754	3239	970	20.72	949	21.04	878	16.9	1054	18.1	7	18779555	18881358	-	mllt3	MLLT3 super elongation complex subunit [Source:ZFIN%3BAcc:ZDB-GENE-050417-356]	GO:0006355:regulation of transcription, DNA-templated;	GO:0005634:nucleus;	-
ENSDARG00000006757	4255	4014	65.26	3939	66.49	4567	66.9	5156	67.4	6	3680651	3692280	+	klhl41b	kelch-like family member 41b [Source:NCBI gene%3BAcc:321064]	-	-	-
ENSDARG00000006758	3525	99	1.94	97	1.98	98	1.73	105	1.66	3	1191370	1204341	-	fam234b	family with sequence similarity 234 member B [Source:ZFIN%3BAcc:ZDB-GENE-030131-3308]	-	-	-
ENSDARG00000006760	1839	238	8.95	192	7.5	230	7.8	225	6.81	13	27073901	27210001	+	slc24a3	solute carrier family 24 member 3 [Source:ZFIN%3BAcc:ZDB-GENE-090312-67]	-	-	-
ENSDARG00000006766	4220	5497	90.11	4974	84.66	6004	88.69	6773	89.27	4	19396945	19694108	-	snd1	staphylococcal nuclease and tudor domain containing 1 [Source:NCBI gene%3BAcc:324404]	-	-	-
ENSDARG00000006773	2172	233	7.42	168	5.56	234	6.72	329	8.43	16	5156420	5167280	+	elovl4a	ELOVL fatty acid elongase 4a [Source:ZFIN%3BAcc:ZDB-GENE-040426-1767]	GO:0042761:very long-chain fatty acid biosynthetic process;	GO:0016021:integral component of membrane;	-
ENSDARG00000006775	3027	250	5.71	211	5.01	241	4.96	310	5.7	11	27745618	27778831	-	cass4	Cas scaffold protein family member 4 [Source:ZFIN%3BAcc:ZDB-GENE-110131-9]	-	-	-
ENSDARG00000006782	3746	1231	22.73	1142	21.9	1271	21.15	1489	22.11	21	22960735	23017478	-	rb1	retinoblastoma 1 [Source:ZFIN%3BAcc:ZDB-GENE-040428-1]	-	-	-
ENSDARG00000006786	2255	486	14.91	535	17.04	589	16.28	569	14.04	3	24094581	24111412	+	copz2	coatomer protein complex%2C subunit zeta 2 [Source:ZFIN%3BAcc:ZDB-GENE-000406-5]	GO:0006810:transport;	-	-
ENSDARG00000006791	2413	260	7.45	297	8.84	295	7.62	363	8.37	25	17893784	17918810	-	arntl1a	aryl hydrocarbon receptor nuclear translocator-like 1a [Source:ZFIN%3BAcc:ZDB-GENE-000509-1]	GO:0009648:photoperiodism;GO:0007623:circadian rhythm;GO:0007165:signal transduction;GO:0045892:negative regulation of transcription, DNA-templated;GO:0045893:positive regulation of transcription, DNA-templated;	GO:0005667:transcription factor complex;GO:0005737:cytoplasm;	GO:0004871:signal transducer activity;GO:0003677:DNA binding;GO:0003700:sequence-specific DNA binding transcription factor activity;GO:0046982:protein heterodimerization activity;
ENSDARG00000006797	1958	71	2.51	49	1.8	64	2.04	67	1.9	20	474288	530663	+	nt5dc1	5'-nucleotidase domain containing 1 [Source:ZFIN%3BAcc:ZDB-GENE-030131-8274]	-	-	-
ENSDARG00000006811	1600	1	0.04	4	0.18	0	0	1	0.03	12	15197857	15205087	-	sult1st6	sulfotransferase family 1%2C cytosolic sulfotransferase 6 [Source:ZFIN%3BAcc:ZDB-GENE-040718-343]	-	-	GO:0004304:estrone sulfotransferase activity;
ENSDARG00000006812	5478	940	11.87	859	11.26	997	11.34	1162	11.8	20	46699021	46734051	+	wdr26b	WD repeat domain 26b [Source:NCBI gene%3BAcc:564794]	-	GO:0005737:cytoplasm;	-
ENSDARG00000006816	1050	2	0.13	1	0.07	1	0.06	0	0	9	18829360	18905317	+	gtf2f2b	general transcription factor IIF%2C polypeptide 2b [Source:ZFIN%3BAcc:ZDB-GENE-050417-374]	GO:0006367:transcription initiation from RNA polymerase II promoter;	GO:0005674:transcription factor TFIIF complex;	GO:0008026:ATP-dependent helicase activity;GO:0005524:ATP binding;
ENSDARG00000006818	1292	1638	87.71	1575	87.56	1550	74.78	1946	83.78	2	27556168	27575803	-	urod	uroporphyrinogen decarboxylase [Source:NCBI gene%3BAcc:30617]	-	-	-
ENSDARG00000006832	6456	26	0.28	32	0.36	40	0.39	29	0.25	5	16797209	16996482	-	galnt9	polypeptide N-acetylgalactosaminyltransferase 9 [Source:ZFIN%3BAcc:ZDB-GENE-060526-21]	GO:0006486:protein glycosylation;	GO:0005794:Golgi apparatus;GO:0016021:integral component of membrane;	GO:0016757:transferase activity, transferring glycosyl groups;
ENSDARG00000006837	2488	2127	59.14	2211	63.83	2693	67.47	3116	69.66	20	33294428	33299384	+	mycn	MYCN proto-oncogene%2C bHLH transcription factor [Source:NCBI gene%3BAcc:252851]	GO:0006355:regulation of transcription, DNA-templated;	GO:0005634:nucleus;	GO:0003700:sequence-specific DNA binding transcription factor activity;GO:0046983:protein dimerization activity;
ENSDARG00000006838	2030	0	0	0	0	0	0	0	0	23	15850938	15878879	-	eef1a2	eukaryotic translation elongation factor 1 alpha 2 [Source:ZFIN%3BAcc:ZDB-GENE-040718-64]	GO:0006414:translational elongation;	GO:0005737:cytoplasm;	GO:0003746:translation elongation factor activity;GO:0005525:GTP binding;GO:0003924:GTPase activity;
ENSDARG00000006840	2564	193	5.21	197	5.52	204	4.96	287	6.23	17	48920799	48936123	-	gnmt	glycine N-methyltransferase [Source:ZFIN%3BAcc:ZDB-GENE-040227-1]	GO:0032259:methylation;	-	GO:0017174:glycine N-methyltransferase activity;
ENSDARG00000006848	7162	0	0	0	0	0	0	0	0	9	23754275	23765480	-	parp9	poly(ADP-ribose) polymerase family member 9 [Source:ZFIN%3BAcc:ZDB-GENE-081104-179]	-	-	GO:0003950:NAD+ ADP-ribosyltransferase activity;
ENSDARG00000006849	3155	16	0.35	10	0.23	15	0.3	25	0.44	3	37824268	38625940	+	asic2	acid-sensing (proton-gated) ion channel 2 [Source:NCBI gene%3BAcc:407669]	GO:0006814:sodium ion transport;	GO:0005886:plasma membrane;GO:0016021:integral component of membrane;	GO:0015280:ligand-gated sodium channel activity;
ENSDARG00000006859	6663	960	9.97	1086	11.71	1238	11.58	1409	11.76	19	43017628	43035187	+	nkain1	sodium/potassium transporting ATPase interacting 1 [Source:NCBI gene%3BAcc:393517]	-	GO:0005886:plasma membrane;GO:0016021:integral component of membrane;	-
ENSDARG00000006862	3963	311	5.43	321	5.82	347	5.46	411	5.77	2	23222939	23293501	+	kifap3b	kinesin-associated protein 3b [Source:ZFIN%3BAcc:ZDB-GENE-030131-2219]	-	GO:0005871:kinesin complex;	GO:0019894:kinesin binding;
ENSDARG00000006863	4816	48	0.69	47	0.7	62	0.8	65	0.75	9	7732714	7767156	+	si:ch1073-349o24.2	si:ch1073-349o24.2 [Source:ZFIN%3BAcc:ZDB-GENE-081104-83]	-	-	-
ENSDARG00000006865	2971	31	0.72	27	0.65	26	0.55	41	0.77	14	39002116	39074539	-	glra4a	glycine receptor%2C alpha 4a [Source:ZFIN%3BAcc:ZDB-GENE-010410-3]	GO:0007417:central nervous system development;GO:0045664:regulation of neuron differentiation;GO:0006821:chloride transport;GO:0043200:response to amino acid;	GO:0030054:cell junction;GO:0045211:postsynaptic membrane;GO:0005887:integral component of plasma membrane;	GO:0016594:glycine binding;GO:0016934:extracellular-glycine-gated chloride channel activity;GO:0022824:transmitter-gated ion channel activity;
ENSDARG00000006868	1768	63	2.47	62	2.52	71	2.5	68	2.14	8	54220551	54223316	-	trh	thyrotropin-releasing hormone [Source:NCBI gene%3BAcc:266721]	GO:0009755:hormone-mediated signaling pathway;	GO:0005576:extracellular region;	GO:0005184:neuropeptide hormone activity;
ENSDARG00000006869	1573	62	2.73	60	2.74	79	3.13	73	2.58	16	27383717	27405460	+	stx17	syntaxin 17 [Source:ZFIN%3BAcc:ZDB-GENE-041114-164]	GO:0006887:exocytosis;GO:0006886:intracellular protein transport;	GO:0031201:SNARE complex;	GO:0005484:SNAP receptor activity;GO:0000149:SNARE binding;
ENSDARG00000006877	1938	41	1.46	28	1.04	29	0.93	39	1.12	17	5599014	5610514	-	enpp4	ectonucleotide pyrophosphatase/phosphodiesterase 4 [Source:NCBI gene%3BAcc:550586]	GO:0008152:metabolic process;	GO:0016021:integral component of membrane;	GO:0016787:hydrolase activity;
ENSDARG00000006878	5780	1179	14.11	1046	13	1265	13.64	1513	14.56	7	38821438	38861741	-	phf21aa	PHD finger protein 21Aa [Source:ZFIN%3BAcc:ZDB-GENE-050208-99]	-	-	-
ENSDARG00000006889	3126	185	4.09	173	3.98	205	4.09	224	3.99	7	16348835	16461232	+	mpped2a	metallophosphoesterase domain containing 2a [Source:ZFIN%3BAcc:ZDB-GENE-050417-241]	-	-	GO:0016787:hydrolase activity;
ENSDARG00000006891	1610	11	0.47	3	0.13	2	0.08	3	0.1	13	32575777	32577386	-	kcns3a	potassium voltage-gated channel%2C delayed-rectifier%2C subfamily S%2C member 3a [Source:ZFIN%3BAcc:ZDB-GENE-080723-45]	-	-	-
ENSDARG00000006892	3835	28	0.51	21	0.39	25	0.41	29	0.42	9	3699397	3866707	-	myo3b	myosin IIIB [Source:ZFIN%3BAcc:ZDB-GENE-070706-2]	-	-	-
ENSDARG00000006894	1486	3	0.14	1	0.05	0	0	2	0.07	2	30878864	30886567	+	oprk1	opioid receptor%2C kappa 1 [Source:ZFIN%3BAcc:ZDB-GENE-030729-1]	GO:0007186:G-protein coupled receptor signaling pathway;	GO:0016021:integral component of membrane;	GO:0042277:peptide binding;GO:0004985:opioid receptor activity;
ENSDARG00000006896	3278	4	0.08	8	0.18	6	0.11	5	0.08	10	9372702	9395220	+	lhx6	LIM homeobox 6 [Source:ZFIN%3BAcc:ZDB-GENE-041025-1]	GO:0006355:regulation of transcription, DNA-templated;	GO:0005634:nucleus;	GO:0003700:sequence-specific DNA binding transcription factor activity;GO:0043565:sequence-specific DNA binding;GO:0008270:zinc ion binding;
ENSDARG00000006899	2787	330	8.19	259	6.68	336	7.51	418	8.34	25	16079913	16129678	+	far1	fatty acyl CoA reductase 1 [Source:ZFIN%3BAcc:ZDB-GENE-040426-2908]	-	-	GO:0080019:fatty-acyl-CoA reductase (alcohol-forming) activity;GO:0000166:nucleotide binding;
ENSDARG00000006900	2335	1199	35.52	1142	35.13	1435	38.31	1724	41.07	8	26059677	26079140	+	impdh2	IMP (inosine 5'-monophosphate) dehydrogenase 2 [Source:NCBI gene%3BAcc:317745]	GO:0055114:oxidation-reduction process;GO:0006177:GMP biosynthetic process;	GO:0005737:cytoplasm;GO:0005634:nucleus;	GO:0046872:metal ion binding;GO:0000166:nucleotide binding;GO:0003938:IMP dehydrogenase activity;
ENSDARG00000006901	4181	147	2.43	87	1.49	103	1.54	104	1.38	8	44759576	44800841	+	si:ch1073-459j12.1	si:ch1073-459j12.1 [Source:ZFIN%3BAcc:ZDB-GENE-030131-8546]	-	-	-
ENSDARG00000006911	3669	101	1.9	88	1.72	106	1.8	85	1.29	13	29991090	30006260	-	wnt8b	wingless-type MMTV integration site family%2C member 8b [Source:NCBI gene%3BAcc:30144]	GO:0021881:Wnt-activated signaling pathway involved in forebrain neuron fate commitment;GO:0022002:negative regulation of anterior neural cell fate commitment of the neural plate by Wnt signaling pathway;GO:0009880:embryonic pattern specification;GO:0021854:hypothalamus development;GO:0070654:sensory epithelium regeneration;GO:0007492:endoderm development;GO:0060070:canonical Wnt signaling pathwa…	GO:0005615:extracellular space;GO:0005578:proteinaceous extracellular matrix;GO:0005886:plasma membrane;	GO:0001664:G-protein coupled receptor binding;
ENSDARG00000006915	1772	286	11.17	250	10.13	375	13.19	445	13.97	6	42951960	42971184	-	arl8ba	ADP-ribosylation factor-like 8Ba [Source:NCBI gene%3BAcc:337424]	GO:0007264:small GTPase mediated signal transduction;GO:0007059:chromosome segregation;GO:0051301:cell division;GO:0007067:mitotic nuclear division;	GO:0005765:lysosomal membrane;GO:0031902:late endosome membrane;GO:0005819:spindle;	GO:0005525:GTP binding;
ENSDARG00000006921	10218	1397	9.46	1263	8.88	1379	8.41	1705	9.28	25	10640623	10769039	-	lrp5	low density lipoprotein receptor-related protein 5 [Source:ZFIN%3BAcc:ZDB-GENE-050518-2]	-	-	-
ENSDARG00000006923	8718	27	0.21	17	0.14	29	0.21	39	0.25	11	30817943	31026335	+	cacna1ab	calcium channel%2C voltage-dependent%2C P/Q type%2C alpha 1A subunit%2C b [Source:ZFIN%3BAcc:ZDB-GENE-090514-3]	-	-	-
ENSDARG00000006924	6521	509	5.4	449	4.95	523	5	670	5.71	14	38656776	38690871	+	fbxo38	F-box protein 38 [Source:ZFIN%3BAcc:ZDB-GENE-030131-2797]	-	-	-
ENSDARG00000006939	3080	356	8	283	6.6	325	6.58	382	6.9	5	42280372	42297333	+	tbx16l	T-box transcription factor 16%2C like [Source:NCBI gene%3BAcc:30254]	GO:0006355:regulation of transcription, DNA-templated;GO:0021523:somatic motor neuron differentiation;GO:0001756:somitogenesis;	GO:0005634:nucleus;	GO:0003677:DNA binding;GO:0003700:sequence-specific DNA binding transcription factor activity;
ENSDARG00000006944	1088	0	0	0	0	1	0.06	0	0	12	3893032	3904011	-	gdpd3b	glycerophosphodiester phosphodiesterase domain containing 3b [Source:ZFIN%3BAcc:ZDB-GENE-121210-2]	-	-	-
ENSDARG00000006963	6648	1464	15.23	1310	14.15	1649	15.46	1926	16.11	11	5468629	5493191	+	cse1l	CSE1 chromosome segregation 1-like (yeast) [Source:NCBI gene%3BAcc:30707]	GO:0006886:intracellular protein transport;	GO:0005737:cytoplasm;GO:0005643:nuclear pore;	GO:0008565:protein transporter activity;
ENSDARG00000006978	3466	64	1.28	55	1.14	46	0.83	88	1.41	9	2896009	2945008	-	zak	sterile alpha motif and leucine zipper containing kinase AZK [Source:ZFIN%3BAcc:ZDB-GENE-070912-386]	-	-	-
ENSDARG00000006981	1144	19	1.15	9	0.57	10	0.54	17	0.83	25	13662606	13668229	+	ccdc113	coiled-coil domain containing 113 [Source:NCBI gene%3BAcc:450041]	-	-	-
ENSDARG00000006983	1419	122	5.95	85	4.3	166	7.29	156	6.11	16	1334431	1359903	+	celf3b	cugbp%2C Elav-like family member 3b [Source:ZFIN%3BAcc:ZDB-GENE-110408-50]	-	-	-
ENSDARG00000006990	1221	123	6.97	159	9.35	178	9.09	206	9.38	8	54202554	54210276	+	creld1b	cysteine-rich with EGF-like domains 1b [Source:ZFIN%3BAcc:ZDB-GENE-161219-1]	-	-	-
ENSDARG00000007009	1878	350	12.89	358	13.69	352	11.68	347	10.28	16	20904754	20907378	+	hoxa11b	homeobox A11b [Source:NCBI gene%3BAcc:30382]	GO:0007275:multicellular organismal development;GO:0006355:regulation of transcription, DNA-templated;	GO:0005634:nucleus;	GO:0003700:sequence-specific DNA binding transcription factor activity;GO:0043565:sequence-specific DNA binding;
ENSDARG00000007018	1035	0	0	2	0.14	0	0	0	0	4	76735113	76742479	+	ms4a17a.6	membrane-spanning 4-domains%2C subfamily A%2C member 17A.6 [Source:ZFIN%3BAcc:ZDB-GENE-070209-265]	-	GO:0016021:integral component of membrane;	-
ENSDARG00000007024	1236	524	29.33	505	29.35	513	25.87	614	27.63	11	8160894	8168011	-	uox	urate oxidase [Source:NCBI gene%3BAcc:436604]	GO:0006144:purine nucleobase metabolic process;GO:0055114:oxidation-reduction process;	GO:0005777:peroxisome;	GO:0004846:urate oxidase activity;
ENSDARG00000007025	1071	134	8.66	129	8.65	139	8.09	120	6.23	14	45350008	45363735	+	ttc9c	tetratricopeptide repeat domain 9C [Source:ZFIN%3BAcc:ZDB-GENE-040426-1053]	-	-	-
ENSDARG00000007034	4012	1855	31.99	1829	32.75	1974	30.67	2680	37.16	5	55602720	55625247	-	hnrpkl	heterogeneous nuclear ribonucleoprotein K%2C like [Source:ZFIN%3BAcc:ZDB-GENE-040426-1923]	-	GO:0030529:ribonucleoprotein complex;	GO:0003676:nucleic acid binding;GO:0003723:RNA binding;
ENSDARG00000007040	1933	13	0.47	6	0.22	16	0.52	7	0.2	21	39925379	39931400	-	tmigd1	transmembrane and immunoglobulin domain containing 1 [Source:ZFIN%3BAcc:ZDB-GENE-080303-6]	-	-	-
ENSDARG00000007045	2619	578	15.27	528	14.48	602	14.33	933	19.81	25	20004835	20024860	-	cnot4a	CCR4-NOT transcription complex%2C subunit 4a [Source:ZFIN%3BAcc:ZDB-GENE-090313-262]	-	-	-
ENSDARG00000007065	1124	465	28.62	457	29.2	528	29.28	543	26.87	19	30423117	30428901	+	mrps18b	mitochondrial ribosomal protein S18B [Source:ZFIN%3BAcc:ZDB-GENE-050417-278]	GO:0006412:translation;	GO:0005840:ribosome;	GO:0003735:structural constituent of ribosome;
ENSDARG00000007067	399	0	0	0	0	0	0	0	0	22	6084771	6085666	+	si:dkey-19a16.16	si:dkey-19a16.16 [Source:ZFIN%3BAcc:ZDB-GENE-141212-322]	-	-	-
ENSDARG00000007077	6026	672	7.71	618	7.37	705	7.29	773	7.14	9	32859967	32875568	+	ankrd50l	ankyrin repeat domain 50-like [Source:ZFIN%3BAcc:ZDB-GENE-041008-117]	-	-	-
ENSDARG00000007080	1983	0	0	1	0.04	0	0	3	0.08	6	36381709	36391687	+	rhcgl1	Rh family%2C C glycoprotein%2C like 1 [Source:ZFIN%3BAcc:ZDB-GENE-060209-2]	GO:0015696:ammonium transport;	GO:0016021:integral component of membrane;	GO:0008519:ammonium transmembrane transporter activity;
ENSDARG00000007081	4101	1607	27.11	1359	23.8	1704	25.9	1794	24.33	22	20406410	20419660	-	pias4a	protein inhibitor of activated STAT%2C 4a [Source:NCBI gene%3BAcc:406712]	GO:0032480:negative regulation of type I interferon production;GO:0060339:negative regulation of type I interferon-mediated signaling pathway;	GO:0005634:nucleus;	GO:0008270:zinc ion binding;GO:0003676:nucleic acid binding;GO:0019789:SUMO transferase activity;
ENSDARG00000007086	1508	13	0.6	9	0.43	22	0.91	13	0.48	16	22288777	22294265	-	aqp10a	aquaporin 10a [Source:ZFIN%3BAcc:ZDB-GENE-040718-40]	GO:0006810:transport;	GO:0016021:integral component of membrane;	GO:0005372:water transmembrane transporter activity;GO:0015204:urea transmembrane transporter activity;GO:0015168:glycerol transmembrane transporter activity;GO:0015105:arsenite transmembrane transporter activity;
ENSDARG00000007092	2903	1180	28.12	1009	24.97	1174	25.21	1394	26.71	3	53317040	53350547	+	xab2	XPA binding protein 2 [Source:ZFIN%3BAcc:ZDB-GENE-040426-685]	GO:0006396:RNA processing;	GO:0005622:intracellular;	-
ENSDARG00000007097	1526	268	12.15	317	14.92	402	16.42	366	13.34	15	7187228	7190183	+	her13	hairy-related 13 [Source:ZFIN%3BAcc:ZDB-GENE-050228-1]	GO:0006355:regulation of transcription, DNA-templated;	GO:0005634:nucleus;	GO:0003677:DNA binding;GO:0046983:protein dimerization activity;
ENSDARG00000007098	1859	2218	82.54	2225	85.97	2433	81.58	2800	83.78	6	10015525	10026858	-	itm2ba	integral membrane protein 2Ba [Source:ZFIN%3BAcc:ZDB-GENE-030131-2352]	-	-	-
ENSDARG00000007099	2391	7280	210.63	7505	225.46	8181	213.28	9572	222.67	9	46405587	46415847	-	cx43.4	connexin 43.4 [Source:NCBI gene%3BAcc:30276]	GO:0007154:cell communication;	GO:0016021:integral component of membrane;GO:0005922:connexon complex;	-
ENSDARG00000007108	2002	233	8.05	202	7.25	242	7.53	254	7.06	21	34945033	34972872	-	lipia	lipase%2C member Ia [Source:NCBI gene%3BAcc:445105]	GO:0016042:lipid catabolic process;	GO:0005576:extracellular region;GO:0016020:membrane;	GO:0016787:hydrolase activity;
ENSDARG00000007125	1714	220	8.88	206	8.63	219	7.96	288	9.35	8	6903327	6918721	-	asb6	ankyrin repeat and SOCS box containing 6 [Source:ZFIN%3BAcc:ZDB-GENE-050522-338]	GO:0035556:intracellular signal transduction;	-	-
ENSDARG00000007127	1945	728	25.89	736	27.18	923	29.58	845	24.16	20	30922595	30931146	-	acat2	acetyl-CoA acetyltransferase 2 [Source:ZFIN%3BAcc:ZDB-GENE-990714-22]	GO:0008152:metabolic process;	-	GO:0016747:transferase activity, transferring acyl groups other than amino-acyl groups;
ENSDARG00000007129	2332	59	1.75	51	1.57	61	1.63	61	1.45	3	16566361	16591648	+	slc6a16a	solute carrier family 6 member 16a [Source:ZFIN%3BAcc:ZDB-GENE-061009-43]	-	-	-
ENSDARG00000007130	1061	1190	77.59	1265	85.64	1376	80.84	1840	96.46	11	41846059	41853874	-	mrto4	MRT4 homolog%2C ribosome maturation factor [Source:ZFIN%3BAcc:ZDB-GENE-050417-142]	GO:0042254:ribosome biogenesis;	GO:0005840:ribosome;	-
ENSDARG00000007135	4220	1358	22.26	1271	21.63	1430	21.12	1853	24.42	16	32110195	32128345	-	cnot3a	CCR4-NOT transcription complex%2C subunit 3a [Source:ZFIN%3BAcc:ZDB-GENE-040927-6]	-	-	-
ENSDARG00000007136	10513	140	0.92	94	0.64	156	0.92	133	0.7	19	27283072	27336092	-	gtf2h4	general transcription factor IIH%2C polypeptide 4 [Source:ZFIN%3BAcc:ZDB-GENE-030131-6779]	GO:0006289:nucleotide-excision repair;	GO:0000439:core TFIIH complex;	GO:0004003:ATP-dependent DNA helicase activity;
ENSDARG00000007141	1860	3135	116.6	3244	125.27	3692	123.73	3843	114.92	7	38680034	38685337	+	psmc3	proteasome 26S subunit%2C ATPase 3 [Source:ZFIN%3BAcc:ZDB-GENE-030131-666]	GO:0030163:protein catabolic process;GO:0006508:proteolysis;	GO:0005737:cytoplasm;GO:0000502:proteasome complex;	GO:0008233:peptidase activity;GO:0005524:ATP binding;GO:0017111:nucleoside-triphosphatase activity;
ENSDARG00000007149	4119	154	2.59	102	1.78	117	1.77	151	2.04	23	28582865	28681775	+	l1cama	L1 cell adhesion molecule%2C paralog a [Source:NCBI gene%3BAcc:30634]	GO:0007155:cell adhesion;GO:0030154:cell differentiation;GO:0007399:nervous system development;	GO:0016021:integral component of membrane;GO:0005886:plasma membrane;	-
ENSDARG00000007151	1470	33	1.55	22	1.07	35	1.48	49	1.85	20	591505	605512	+	kcnk2b	potassium channel%2C subfamily K%2C member 2b [Source:ZFIN%3BAcc:ZDB-GENE-051120-69]	GO:0071805:potassium ion transmembrane transport;	GO:0016021:integral component of membrane;	GO:0005267:potassium channel activity;
ENSDARG00000007169	1394	147	7.3	127	6.54	133	5.95	144	5.75	17	35225614	35238359	-	itgb1bp1	integrin beta 1 binding protein 1 [Source:ZFIN%3BAcc:ZDB-GENE-051113-264]	GO:0007229:integrin-mediated signaling pathway;	-	-
ENSDARG00000007171	1881	8	0.29	11	0.42	24	0.8	20	0.59	20	37661229	37736703	+	aig1	androgen-induced 1 (H. sapiens) [Source:ZFIN%3BAcc:ZDB-GENE-041014-358]	-	-	-
ENSDARG00000007172	6597	1279	13.41	1152	12.54	1295	12.24	1655	13.95	8	9222684	9570511	-	plxna3	plexin A3 [Source:NCBI gene%3BAcc:567422]	GO:0048675:axon extension;GO:0060272:embryonic skeletal joint morphogenesis;GO:0008045:motor neuron axon guidance;GO:0007165:signal transduction;GO:0048755:branching morphogenesis of a nerve;	GO:0016021:integral component of membrane;GO:0005622:intracellular;GO:0005886:plasma membrane;	GO:0004872:receptor activity;
ENSDARG00000007175	3578	594	11.48	582	11.68	639	11.13	674	10.48	4	17424855	17538270	+	recql	RecQ helicase-like [Source:ZFIN%3BAcc:ZDB-GENE-050809-134]	GO:0006260:DNA replication;GO:0006310:DNA recombination;GO:0006281:DNA repair;	-	GO:0043140:ATP-dependent 3'-5' DNA helicase activity;GO:0003676:nucleic acid binding;GO:0005524:ATP binding;
ENSDARG00000007179	9014	812	6.23	688	5.48	830	5.74	1043	6.44	20	31428819	31743817	-	sash1a	SAM and SH3 domain containing 1a [Source:ZFIN%3BAcc:ZDB-GENE-030131-9960]	-	-	-
ENSDARG00000007180	3295	183	3.84	191	4.16	173	3.27	201	3.39	18	5510251	5541784	+	slc30a4	solute carrier family 30 member 4 [Source:ZFIN%3BAcc:ZDB-GENE-040426-1408]	GO:0006829:zinc II ion transport;	-	GO:0005385:zinc ion transmembrane transporter activity;
ENSDARG00000007181	2115	188	6.15	155	5.26	194	5.72	222	5.84	21	22330005	22346723	+	nadk2	NAD kinase 2%2C mitochondrial [Source:ZFIN%3BAcc:ZDB-GENE-040801-202]	GO:0006741:NADP biosynthetic process;GO:0019674:NAD metabolic process;	-	GO:0003951:NAD+ kinase activity;
ENSDARG00000007184	8126	7119	60.61	6366	56.27	7188	55.14	7899	54.07	21	23159385	23331619	-	zbtb16a	zinc finger and BTB domain containing 16a [Source:NCBI gene%3BAcc:323269]	GO:0006355:regulation of transcription, DNA-templated;GO:0050767:regulation of neurogenesis;	GO:0005737:cytoplasm;GO:0005634:nucleus;	GO:0008270:zinc ion binding;GO:0003677:DNA binding;
ENSDARG00000007186	1282	105	5.67	120	6.72	132	6.42	162	7.03	19	15521997	15532515	+	ppp1r8a	protein phosphatase 1%2C regulatory subunit 8a [Source:ZFIN%3BAcc:ZDB-GENE-060503-681]	-	-	-
ENSDARG00000007195	5545	151	1.88	150	1.94	188	2.11	209	2.1	11	36158134	36216651	+	grm2b	glutamate receptor%2C metabotropic 2b [Source:ZFIN%3BAcc:ZDB-GENE-060201-5]	-	-	-
ENSDARG00000007196	1560	1147	50.86	1154	53.13	1174	46.91	1229	43.82	6	22326624	22334059	+	rae1	ribonucleic acid export 1 [Source:NCBI gene%3BAcc:393973]	-	GO:0005634:nucleus;GO:0005737:cytoplasm;	-
ENSDARG00000007198	3717	358	6.66	351	6.78	437	7.33	501	7.5	17	37510808	37618891	+	mta1	metastasis associated 1 [Source:ZFIN%3BAcc:ZDB-GENE-131121-353]	-	-	-
ENSDARG00000007199	1967	0	0	0	0	0	0	0	0	7	25702443	25709533	+	CR846090.1	-	-	-	-
ENSDARG00000007207	3990	93	1.61	108	1.94	115	1.8	116	1.62	11	2540139	2549140	-	cnpy2	canopy FGF signaling regulator 2 [Source:ZFIN%3BAcc:ZDB-GENE-060315-4]	-	-	-
ENSDARG00000007216	3311	4977	103.99	4714	102.26	5456	102.72	6198	104.12	23	43695036	43718067	-	abce1	ATP-binding cassette%2C sub-family E (OABP)%2C member 1 [Source:ZFIN%3BAcc:ZDB-GENE-040426-1995]	-	-	GO:0016887:ATPase activity;GO:0005524:ATP binding;GO:0009055:electron carrier activity;GO:0051536:iron-sulfur cluster binding;
ENSDARG00000007217	5284	332	4.35	338	4.59	345	4.07	436	4.59	21	34814444	34843004	+	wdr55	WD repeat domain 55 [Source:NCBI gene%3BAcc:445394]	GO:0060465:pharynx development;GO:0048538:thymus development;GO:0006364:rRNA processing;GO:0001654:eye development;GO:0048794:swim bladder development;	GO:0005730:nucleolus;	-
ENSDARG00000007219	4390	1827	28.79	1640	26.83	1907	27.08	2381	30.17	13	36321088	36391502	-	actn1	actinin%2C alpha 1 [Source:ZFIN%3BAcc:ZDB-GENE-081113-4]	GO:0051017:actin filament bundle assembly;GO:0051764:actin crosslink formation;	-	GO:0003779:actin binding;GO:0005509:calcium ion binding;
ENSDARG00000007220	4020	404	6.95	323	5.77	560	8.68	706	9.77	15	18368809	18574716	-	ncam1b	neural cell adhesion molecule 1b [Source:ZFIN%3BAcc:ZDB-GENE-010822-2]	GO:0007155:cell adhesion;	GO:0016020:membrane;	-
ENSDARG00000007221	1960	757	26.72	780	28.58	969	30.82	897	25.46	20	39359729	39368079	-	pbk	PDZ binding kinase [Source:NCBI gene%3BAcc:360218]	GO:0006468:protein phosphorylation;	-	GO:0005524:ATP binding;GO:0004674:protein serine/threonine kinase activity;
ENSDARG00000007231	3984	906	15.73	858	15.47	971	15.19	1170	16.33	6	27514465	27615701	+	ryk	receptor like tyrosine kinase [Source:ZFIN%3BAcc:ZDB-GENE-070209-277]	GO:0006468:protein phosphorylation;GO:0051209:release of sequestered calcium ion into cytosol;GO:0060030:dorsal convergence;GO:0007223:Wnt signaling pathway, calcium modulating pathway;GO:0060028:convergent extension involved in axis elongation;	GO:0005886:plasma membrane;	GO:0017147:Wnt-protein binding;GO:0004713:protein tyrosine kinase activity;GO:0005524:ATP binding;
ENSDARG00000007241	1822	744	28.25	855	33.71	787	26.92	924	28.21	2	32016256	32018371	+	mycb	MYC proto-oncogene%2C bHLH transcription factor b [Source:NCBI gene%3BAcc:393141]	GO:0006355:regulation of transcription, DNA-templated;GO:0006351:transcription, DNA-templated;	GO:0005634:nucleus;	GO:0003700:sequence-specific DNA binding transcription factor activity;GO:0003677:DNA binding;GO:0046983:protein dimerization activity;GO:0005488:binding;
ENSDARG00000007244	1209	255	14.59	214	12.71	283	14.59	275	12.65	7	39360797	39371386	+	acp2	acid phosphatase 2%2C lysosomal [Source:ZFIN%3BAcc:ZDB-GENE-050306-40]	-	-	GO:0003993:acid phosphatase activity;
ENSDARG00000007245	1776	27	1.05	27	1.09	20	0.7	36	1.13	3	21018053	21037840	-	rundc3aa	RUN domain containing 3Aa [Source:ZFIN%3BAcc:ZDB-GENE-130530-533]	-	-	-
ENSDARG00000007247	2535	37	1.01	38	1.08	29	0.71	44	0.97	25	10458990	10483226	+	ric8a	RIC8 guanine nucleotide exchange factor A [Source:NCBI gene%3BAcc:449546]	-	GO:0005737:cytoplasm;GO:0005886:plasma membrane;	GO:0005085:guanyl-nucleotide exchange factor activity;
ENSDARG00000007250	1836	151	5.69	154	6.02	170	5.77	162	4.91	22	11070842	11079068	-	use1	unconventional SNARE in the ER 1 homolog (S. cerevisiae) [Source:NCBI gene%3BAcc:393294]	GO:0015031:protein transport;GO:0016192:vesicle-mediated transport;	GO:0016021:integral component of membrane;GO:0005789:endoplasmic reticulum membrane;	-
ENSDARG00000007257	1279	619	33.48	598	33.58	716	34.9	840	36.53	16	49647402	49661406	+	rab5ab	RAB5A%2C member RAS oncogene family%2C b [Source:ZFIN%3BAcc:ZDB-GENE-040122-3]	GO:0007264:small GTPase mediated signal transduction;GO:0015031:protein transport;	-	GO:0005525:GTP binding;
ENSDARG00000007264	855	202	16.34	220	18.48	242	17.64	238	15.48	15	404891	413541	+	nipsnap2	-	-	GO:0005739:mitochondrion;	-
ENSDARG00000007271	3044	924	21	1038	24.49	1250	25.6	1390	25.4	24	26328787	26343203	+	mynn	myoneurin [Source:NCBI gene%3BAcc:327167]	GO:0006355:regulation of transcription, DNA-templated;	GO:0005634:nucleus;	GO:0003677:DNA binding;GO:0008270:zinc ion binding;
ENSDARG00000007275	2261	447	13.68	398	12.64	147	4.05	183	4.5	8	47633438	47665026	+	si:ch211-251b21.1	si:ch211-251b21.1 [Source:ZFIN%3BAcc:ZDB-GENE-060809-5]	-	-	-
ENSDARG00000007276	973	0	0	0	0	0	0	0	0	5	26111596	26118855	-	ela3l	elastase 3 like [Source:ZFIN%3BAcc:ZDB-GENE-060710-2]	-	-	-
ENSDARG00000007277	1415	276	13.49	254	12.89	276	12.16	329	12.93	4	21741228	21745107	+	myf5	myogenic factor 5 [Source:ZFIN%3BAcc:ZDB-GENE-000616-6]	GO:0048741:skeletal muscle fiber development;GO:0002074:extraocular skeletal muscle development;GO:0006355:regulation of transcription, DNA-templated;GO:0043282:pharyngeal muscle development;	GO:0005730:nucleolus;GO:0005654:nucleoplasm;	GO:0003677:DNA binding;GO:0046983:protein dimerization activity;
ENSDARG00000007278	9707	804	5.73	749	5.54	1013	6.51	1152	6.6	11	10388303	10456553	-	ect2	epithelial cell transforming 2 [Source:ZFIN%3BAcc:ZDB-GENE-040831-2]	GO:0000910:cytokinesis;GO:0000902:cell morphogenesis;GO:0035023:regulation of Rho protein signal transduction;GO:0045666:positive regulation of neuron differentiation;	GO:0005737:cytoplasm;GO:0005634:nucleus;	GO:0005089:Rho guanyl-nucleotide exchange factor activity;GO:0005096:GTPase activator activity;
ENSDARG00000007279	1430	609	29.46	529	26.57	609	26.55	812	31.58	21	40930177	40938382	-	yipf5	Yip1 domain family%2C member 5 [Source:NCBI gene%3BAcc:393265]	-	-	-
ENSDARG00000007285	1394	572	28.39	622	32.05	685	30.63	814	32.48	17	26608510	26610862	-	mrpl57	mitochondrial ribosomal protein L57 [Source:NCBI gene%3BAcc:393748]	-	GO:0005840:ribosome;GO:0005739:mitochondrion;	-
ENSDARG00000007289	1144	27	1.63	31	1.95	49	2.67	52	2.53	1	57371447	57382010	+	metrnlb	meteorin like%2C glial cell differentiation regulator b [Source:ZFIN%3BAcc:ZDB-GENE-121214-223]	-	-	-
ENSDARG00000007294	3495	3069	60.75	2916	59.93	3728	66.49	4241	67.49	12	19106571	19119176	-	aco2	aconitase 2%2C mitochondrial [Source:ZFIN%3BAcc:ZDB-GENE-030131-1390]	GO:0006099:tricarboxylic acid cycle;	-	GO:0003994:aconitate hydratase activity;GO:0051539:4 iron, 4 sulfur cluster binding;
ENSDARG00000007302	3153	86	1.89	86	1.96	106	2.1	157	2.77	25	19522954	19537323	+	sh3gl3b	SH3-domain GRB2-like 3b [Source:ZFIN%3BAcc:ZDB-GENE-040121-4]	GO:0048514:blood vessel morphogenesis;	GO:0005737:cytoplasm;	-
ENSDARG00000007315	2587	1430	38.24	1386	38.48	1718	41.4	1804	38.79	4	16857722	16876336	-	tmpoa	thymopoietin a [Source:ZFIN%3BAcc:ZDB-GENE-030131-6003]	GO:0007084:mitotic nuclear envelope reassembly;	GO:0042175:nuclear outer membrane-endoplasmic reticulum membrane network;GO:0000793:condensed chromosome;GO:0016021:integral component of membrane;	GO:0003677:DNA binding;GO:0003682:chromatin binding;
ENSDARG00000007320	1039	25177	1676.36	24373	1684.95	24998	1499.73	22497	1204.36	2	30177476	30182353	-	rpl7	ribosomal protein L7 [Source:ZFIN%3BAcc:ZDB-GENE-030131-8654]	GO:0051726:regulation of cell cycle;	GO:0005840:ribosome;	-
ENSDARG00000007323	1783	994	38.57	985	39.68	1130	39.5	1290	40.24	8	45361735	45375108	+	chmp4bb	charged multivesicular body protein 4Bb [Source:NCBI gene%3BAcc:406766]	GO:0006810:transport;	GO:0016020:membrane;GO:0005768:endosome;GO:0005737:cytoplasm;	-
ENSDARG00000007329	4949	222	3.1	205	2.98	211	2.66	229	2.57	8	51733907	51753604	-	tbx16	T-box transcription factor 16 [Source:ZFIN%3BAcc:ZDB-GENE-990615-5]	GO:0001525:angiogenesis;GO:0048389:intermediate mesoderm development;GO:0060218:hematopoietic stem cell differentiation;GO:0001947:heart looping;GO:0060809:mesodermal to mesenchymal transition involved in gastrulation;GO:0030218:erythrocyte differentiation;GO:0007525:somatic muscle development;GO:0039023:pronephric duct morphogenesis;GO:2000223:regulation of BMP signaling pathway involved in hear…	GO:0005634:nucleus;	GO:0044212:transcription regulatory region DNA binding;GO:0003700:sequence-specific DNA binding transcription factor activity;
ENSDARG00000007344	1190	11	0.64	6	0.36	10	0.52	6	0.28	3	21240594	21242460	-	tcap	titin-cap (telethonin) [Source:ZFIN%3BAcc:ZDB-GENE-070501-5]	-	-	-
ENSDARG00000007347	1639	752	31.74	752	32.96	911	34.65	791	26.84	13	502230	514843	+	degs1	delta(4)-desaturase%2C sphingolipid 1 [Source:ZFIN%3BAcc:ZDB-GENE-030131-5283]	GO:0006633:fatty acid biosynthetic process;GO:0055114:oxidation-reduction process;	GO:0016021:integral component of membrane;	GO:0016705:oxidoreductase activity, acting on paired donors, with incorporation or reduction of molecular oxygen;
ENSDARG00000007349	3500	15	0.3	28	0.57	54	0.96	36	0.57	5	44944778	44991344	+	dmrt1	doublesex and mab-3 related transcription factor 1 [Source:NCBI gene%3BAcc:402923]	GO:0044699:single-organism process;GO:0006351:transcription, DNA-templated;GO:0032502:developmental process;GO:0007548:sex differentiation;GO:0006355:regulation of transcription, DNA-templated;GO:0030154:cell differentiation;GO:0007275:multicellular organismal development;	GO:0005634:nucleus;	GO:0003677:DNA binding;GO:0046872:metal ion binding;GO:0043565:sequence-specific DNA binding;
ENSDARG00000007356	1107	20	1.25	27	1.75	31	1.75	26	1.31	1	16393077	16394814	-	fgf20a	fibroblast growth factor 20a [Source:ZFIN%3BAcc:ZDB-GENE-060110-1]	GO:0060249:anatomical structure homeostasis;GO:0031101:fin regeneration;	-	GO:0008083:growth factor activity;
ENSDARG00000007358	2860	21	0.51	17	0.43	7	0.15	15	0.29	16	11853212	11859309	-	cxcr3.1	chemokine (C-X-C motif) receptor 3%2C tandem duplicate 1 [Source:ZFIN%3BAcc:ZDB-GENE-060130-38]	GO:0006935:chemotaxis;GO:0007204:positive regulation of cytosolic calcium ion concentration;GO:0007186:G-protein coupled receptor signaling pathway;	GO:0016021:integral component of membrane;	GO:0016494:C-X-C chemokine receptor activity;
ENSDARG00000007359	845	257	21.04	289	24.57	298	21.98	260	17.11	8	50953776	50962889	+	UBL4A	zgc:56596 [Source:NCBI gene%3BAcc:393270]	GO:0006810:transport;GO:0071816:tail-anchored membrane protein insertion into ER membrane;	GO:0071818:BAT3 complex;GO:0016020:membrane;	-
ENSDARG00000007362	2548	269	7.3	206	5.81	290	7.09	303	6.61	13	4368504	4400816	+	sft2d1	SFT2 domain containing 1 [Source:ZFIN%3BAcc:ZDB-GENE-040426-1350]	GO:0016192:vesicle-mediated transport;	GO:0016021:integral component of membrane;	-
ENSDARG00000007366	2516	17	0.47	30	0.86	41	1.02	43	0.95	7	19389304	19401501	+	AMDHD1	si:ch73-71d17.1 [Source:NCBI gene%3BAcc:402826]	GO:0019556:histidine catabolic process to glutamate and formamide;	GO:0005737:cytoplasm;	GO:0016812:hydrolase activity, acting on carbon-nitrogen (but not peptide) bonds, in cyclic amides;
ENSDARG00000007369	5114	648	8.77	589	8.27	688	8.39	786	8.55	8	52106818	52230115	-	tcf7l1b	transcription factor 7 like 1b [Source:NCBI gene%3BAcc:30556]	GO:0006357:regulation of transcription from RNA polymerase II promoter;GO:0010456:cell proliferation in dorsal spinal cord;GO:0009880:embryonic pattern specification;GO:0021513:spinal cord dorsal/ventral patterning;GO:0030901:midbrain development;GO:0021903:rostrocaudal neural tube patterning;GO:0030902:hindbrain development;GO:0060070:canonical Wnt signaling pathway;GO:0008284:positive regulatio…	GO:0005667:transcription factor complex;	GO:0008013:beta-catenin binding;GO:0044212:transcription regulatory region DNA binding;GO:0043565:sequence-specific DNA binding;GO:0003700:sequence-specific DNA binding transcription factor activity;GO:0003682:chromatin binding;
ENSDARG00000007370	9317	984	7.31	905	6.98	1467	9.81	1696	10.13	7	25558275	25697285	-	dysf	dysferlin%2C limb girdle muscular dystrophy 2B (autosomal recessive) [Source:ZFIN%3BAcc:ZDB-GENE-070501-1]	GO:0001778:plasma membrane repair;GO:0048644:muscle organ morphogenesis;GO:0033292:T-tubule organization;	GO:0016021:integral component of membrane;GO:0030315:T-tubule;	-
ENSDARG00000007371	2244	0	0	0	0	0	0	0	0	4	18824959	18835544	+	slc26a3.1	solute carrier family 26 member 3 [Source:ZFIN%3BAcc:ZDB-GENE-041210-180]	-	-	-
ENSDARG00000007377	5194	3907	52.04	3935	54.42	4796	57.56	5115	54.78	17	51743908	51760243	+	odc1	ornithine decarboxylase 1 [Source:ZFIN%3BAcc:ZDB-GENE-010816-1]	GO:0006596:polyamine biosynthetic process;GO:0042462:eye photoreceptor cell development;	-	GO:0003824:catalytic activity;
ENSDARG00000007382	2272	47	1.43	47	1.49	56	1.54	65	1.59	13	31371536	31378683	-	ubtd1a	ubiquitin domain containing 1a [Source:ZFIN%3BAcc:ZDB-GENE-070424-93]	-	-	-
ENSDARG00000007383	4113	177	2.98	145	2.53	178	2.7	163	2.2	18	46171104	46183462	-	kcnk6	potassium channel%2C subfamily K%2C member 6 [Source:ZFIN%3BAcc:ZDB-GENE-050309-213]	GO:0071805:potassium ion transmembrane transport;	GO:0016021:integral component of membrane;	GO:0005267:potassium channel activity;
ENSDARG00000007385	2226	7760	241.17	7616	245.75	8872	248.44	10034	250.72	7	60148452	60156409	-	cct7	chaperonin containing TCP1%2C subunit 7 (eta) [Source:ZFIN%3BAcc:ZDB-GENE-020419-7]	GO:0006457:protein folding;	GO:0005737:cytoplasm;	GO:0005524:ATP binding;GO:0051082:unfolded protein binding;
ENSDARG00000007387	2421	584	16.69	628	18.63	769	19.8	776	17.83	1	39859782	39880189	+	irf2a	interferon regulatory factor 2a [Source:ZFIN%3BAcc:ZDB-GENE-030131-4135]	-	-	-
ENSDARG00000007396	1473	103	4.84	118	5.75	138	5.84	152	5.74	9	23026324	23033818	-	rnd3b	Rho family GTPase 3b [Source:ZFIN%3BAcc:ZDB-GENE-040718-331]	-	-	-
ENSDARG00000007398	6534	66	0.7	34	0.37	38	0.36	83	0.71	7	9526268	9717020	-	lrrk1	leucine-rich repeat kinase 1 [Source:ZFIN%3BAcc:ZDB-GENE-101019-2]	-	-	-
ENSDARG00000007405	1823	1183	44.89	1045	41.17	1270	43.43	1427	43.54	4	16876831	16883051	-	strap	serine/threonine kinase receptor associated protein [Source:ZFIN%3BAcc:ZDB-GENE-040426-1110]	GO:0016310:phosphorylation;	-	GO:0016301:kinase activity;
ENSDARG00000007406	3891	62	1.1	69	1.27	66	1.06	79	1.13	15	47440477	47449248	+	phox2a	paired like homeobox 2A [Source:ZFIN%3BAcc:ZDB-GENE-000223-14]	-	-	-
ENSDARG00000007407	1430	33	1.6	39	1.96	29	1.26	38	1.48	11	27543093	27545719	+	barx1	BARX homeobox 1 [Source:NCBI gene%3BAcc:553644]	GO:0060037:pharyngeal system development;GO:0051216:cartilage development;GO:0006355:regulation of transcription, DNA-templated;GO:0002053:positive regulation of mesenchymal cell proliferation;	GO:0005634:nucleus;	GO:0003700:sequence-specific DNA binding transcription factor activity;GO:0000976:transcription regulatory region sequence-specific DNA binding;
ENSDARG00000007409	1032	12	0.8	31	2.16	36	2.17	41	2.21	13	30572172	30575799	+	ppifa	peptidylprolyl isomerase Fa [Source:ZFIN%3BAcc:ZDB-GENE-040912-52]	GO:0006457:protein folding;	-	GO:0003755:peptidyl-prolyl cis-trans isomerase activity;
ENSDARG00000007412	1903	67	2.44	47	1.77	52	1.7	67	1.96	6	48068695	48094342	-	slc2a1b	solute carrier family 2 member 1b [Source:ZFIN%3BAcc:ZDB-GENE-090915-1]	GO:0035428:hexose transmembrane transport;GO:0015758:glucose transport;	GO:0016021:integral component of membrane;	GO:0055056:D-glucose transmembrane transporter activity;
ENSDARG00000007413	6475	1433	15.31	1276	14.15	1485	14.3	1936	16.63	4	1647098	1684347	-	arid2	AT rich interactive domain 2 (ARID%2C RFX-like) [Source:ZFIN%3BAcc:ZDB-GENE-030131-6311]	GO:0006355:regulation of transcription, DNA-templated;	GO:0005622:intracellular;	GO:0003677:DNA binding;GO:0008270:zinc ion binding;
ENSDARG00000007418	1212	94	5.37	88	5.22	122	6.27	127	5.83	24	11070110	11076400	-	chmp4c	charged multivesicular body protein 4C [Source:ZFIN%3BAcc:ZDB-GENE-050417-389]	GO:0015031:protein transport;	-	-
ENSDARG00000007421	1707	13	0.53	10	0.42	23	0.84	36	1.17	22	12770877	12786532	+	ftcd	formimidoyltransferase cyclodeaminase [Source:ZFIN%3BAcc:ZDB-GENE-030131-9643]	GO:0044237:cellular metabolic process;	GO:0005794:Golgi apparatus;	GO:0005542:folic acid binding;GO:0016740:transferase activity;
ENSDARG00000007425	1741	49	1.95	52	2.15	52	1.86	73	2.33	2	37971353	37974725	+	apol1	apolipoprotein L%2C 1 [Source:ZFIN%3BAcc:ZDB-GENE-030131-3217]	GO:0006869:lipid transport;GO:0042157:lipoprotein metabolic process;	GO:0005576:extracellular region;	GO:0008289:lipid binding;
ENSDARG00000007429	2096	300	9.9	314	10.76	366	10.88	376	9.98	5	32490238	32498736	+	ndor1	NADPH dependent diflavin oxidoreductase 1 [Source:NCBI gene%3BAcc:393621]	GO:0036245:cellular response to menadione;GO:0008219:cell death;GO:0055114:oxidation-reduction process;	GO:0005829:cytosol;GO:0048471:perinuclear region of cytoplasm;	GO:0003958:NADPH-hemoprotein reductase activity;GO:0005506:iron ion binding;GO:0016709:oxidoreductase activity, acting on paired donors, with incorporation or reduction of molecular oxygen, NAD(P)H as one donor, and incorporation of one atom of oxygen;GO:0010181:FMN binding;
ENSDARG00000007430	3027	627	14.33	595	14.12	591	12.17	697	12.81	5	63509761	63515210	-	prdm12b	PR domain containing 12b [Source:ZFIN%3BAcc:ZDB-GENE-041114-172]	-	GO:0005622:intracellular;	GO:0008270:zinc ion binding;GO:0003676:nucleic acid binding;
ENSDARG00000007436	1351	8	0.41	6	0.32	2	0.09	7	0.29	23	25038995	25050521	-	avpr2aa	arginine vasopressin receptor 2a%2C duplicate a [Source:ZFIN%3BAcc:ZDB-GENE-090313-344]	-	-	-
ENSDARG00000007438	1252	2708	149.63	2680	153.75	2942	146.47	4019	178.55	24	37257596	37272116	-	ube2ib	ubiquitin-conjugating enzyme E2Ib [Source:NCBI gene%3BAcc:30622]	GO:0016925:protein sumoylation;GO:0007088:regulation of mitotic nuclear division;GO:0007059:chromosome segregation;GO:0061484:hematopoietic stem cell homeostasis;GO:0051301:cell division;GO:0007275:multicellular organismal development;	GO:0005634:nucleus;	GO:0005524:ATP binding;GO:0019789:SUMO transferase activity;
ENSDARG00000007443	2626	129	3.4	118	3.23	125	2.97	128	2.71	1	8638162	8646941	-	fbxl18	F-box and leucine-rich repeat protein 18 [Source:ZFIN%3BAcc:ZDB-GENE-050913-65]	-	-	-
ENSDARG00000007444	3840	146	2.63	93	1.74	136	2.21	176	2.55	8	11642070	11681559	+	ift81	intraflagellar transport 81 homolog [Source:ZFIN%3BAcc:ZDB-GENE-040714-3]	GO:0048793:pronephros development;GO:0032006:regulation of TOR signaling;	-	-
ENSDARG00000007449	2223	545	16.96	540	17.45	580	16.26	634	15.86	3	29872819	29891500	-	slc25a39	solute carrier family 25 member 39 [Source:NCBI gene%3BAcc:393458]	GO:0006783:heme biosynthetic process;GO:0006828:manganese ion transport;GO:0055085:transmembrane transport;	GO:0005743:mitochondrial inner membrane;GO:0016021:integral component of membrane;	GO:0016530:metallochaperone activity;
ENSDARG00000007461	3747	583	10.76	475	9.11	667	11.1	815	12.1	18	12867400	13056801	-	srgap1a	SLIT-ROBO Rho GTPase activating protein 1a [Source:ZFIN%3BAcc:ZDB-GENE-050420-284]	-	-	-
ENSDARG00000007465	6183	18	0.2	18	0.21	24	0.24	28	0.25	12	30344076	30359540	-	tdrd1	tudor domain containing 1 [Source:NCBI gene%3BAcc:553522]	GO:0007126:meiotic nuclear division;GO:0007283:spermatogenesis;GO:0031047:gene silencing by RNA;GO:0030719:P granule organization;GO:0043046:DNA methylation involved in gamete generation;GO:0034587:piRNA metabolic process;	GO:0071546:pi-body;	GO:0008270:zinc ion binding;GO:0034584:piRNA binding;
ENSDARG00000007467	1979	5	0.17	11	0.4	10	0.31	11	0.31	12	17025726	17028255	-	ifit10	interferon-induced protein with tetratricopeptide repeats 10 [Source:ZFIN%3BAcc:ZDB-GENE-121214-248]	-	-	-
ENSDARG00000007477	1815	62	2.36	70	2.77	62	2.13	67	2.05	1	38346043	38361496	-	fbxo8	F-box protein 8 [Source:ZFIN%3BAcc:ZDB-GENE-060421-7091]	GO:0032012:regulation of ARF protein signal transduction;GO:0016192:vesicle-mediated transport;GO:0050790:regulation of catalytic activity;GO:0030036:actin cytoskeleton organization;	GO:0030054:cell junction;GO:0005634:nucleus;GO:0005802:trans-Golgi network;	GO:0005086:ARF guanyl-nucleotide exchange factor activity;
ENSDARG00000007480	1910	53	1.92	15	0.56	22	0.72	37	1.08	2	1428696	1443692	-	rpe65a	retinoid isomerohydrolase RPE65 a [Source:NCBI gene%3BAcc:393724]	-	-	-
ENSDARG00000007485	3111	516	11.47	513	11.84	636	12.74	711	12.71	9	25347814	25366541	-	epc2	enhancer of polycomb homolog 2 (Drosophila) [Source:ZFIN%3BAcc:ZDB-GENE-040426-802]	-	GO:0032777:Piccolo NuA4 histone acetyltransferase complex;	-
ENSDARG00000007490	1333	38	1.97	26	1.4	34	1.59	45	1.88	12	30442230	30443562	-	adrb1	adrenoceptor beta 1 [Source:ZFIN%3BAcc:ZDB-GENE-081022-145]	GO:0002027:regulation of heart rate;GO:0071875:adrenergic receptor signaling pathway;	GO:0005886:plasma membrane;GO:0016021:integral component of membrane;	GO:0004935:adrenergic receptor activity;
ENSDARG00000007494	1918	311	11.22	307	11.5	330	10.72	439	12.73	11	26568492	26590429	-	st3gal8	ST3 beta-galactoside alpha-2%2C3-sialyltransferase 8 [Source:ZFIN%3BAcc:ZDB-GENE-050417-286]	GO:0006486:protein glycosylation;	GO:0030173:integral component of Golgi membrane;	GO:0003836:beta-galactoside (CMP) alpha-2,3-sialyltransferase activity;
ENSDARG00000007496	2872	558	13.44	574	14.36	606	13.15	692	13.4	20	418513	438646	-	ufl1	UFM1-specific ligase 1 [Source:NCBI gene%3BAcc:393578]	GO:0071569:protein ufmylation;	GO:0005783:endoplasmic reticulum;	GO:0071568:UFM1 transferase activity;
ENSDARG00000007523	5497	1281	16.12	1197	15.64	1245	14.12	1680	17	4	22424451	22472653	-	kmt2e	lysine (K)-specific methyltransferase 2E [Source:ZFIN%3BAcc:ZDB-GENE-030131-4120]	-	-	GO:0008270:zinc ion binding;
ENSDARG00000007526	1593	1815	78.82	1833	82.65	2102	82.25	2407	84.04	7	19043750	19068539	-	ndufs2	NADH:ubiquinone oxidoreductase core subunit S2 [Source:ZFIN%3BAcc:ZDB-GENE-050522-273]	-	-	-
ENSDARG00000007531	1701	311	12.65	379	16	390	14.29	343	11.22	10	42898103	42903716	+	zcchc9	zinc finger%2C CCHC domain containing 9 [Source:ZFIN%3BAcc:ZDB-GENE-031030-9]	-	-	GO:0008270:zinc ion binding;GO:0003676:nucleic acid binding;
ENSDARG00000007534	2191	0	0	6	0.2	0	0	0	0	1	15204633	15224338	+	itln1	intelectin 1 [Source:ZFIN%3BAcc:ZDB-GENE-060929-564]	-	-	-
ENSDARG00000007553	3192	2	0.04	6	0.14	5	0.1	3	0.05	2	32843133	32846324	+	opn4.1	opsin 4.1 [Source:NCBI gene%3BAcc:352918]	GO:0008377:light-induced release of internally sequestered calcium ion;GO:0018298:protein-chromophore linkage;GO:0007601:visual perception;	GO:0016021:integral component of membrane;	GO:0004930:G-protein coupled receptor activity;GO:0009881:photoreceptor activity;
ENSDARG00000007560	3253	184	3.91	175	3.86	236	4.52	266	4.55	8	26522013	26573963	+	sema3bl	sema domain%2C immunoglobulin domain (Ig)%2C short basic domain%2C secreted%2C (semaphorin) 3bl [Source:ZFIN%3BAcc:ZDB-GENE-030131-2956]	GO:0007275:multicellular organismal development;	GO:0016020:membrane;	GO:0004872:receptor activity;
ENSDARG00000007561	9179	7	0.05	26	0.2	29	0.2	17	0.1	13	43050562	43213012	+	cdh23	cadherin-related 23 [Source:ZFIN%3BAcc:ZDB-GENE-040513-7]	-	-	-
ENSDARG00000007566	2895	901	21.53	866	21.49	1010	21.75	1153	22.15	15	23922264	23942861	-	appbp2	amyloid beta precursor protein (cytoplasmic tail) binding protein 2 [Source:ZFIN%3BAcc:ZDB-GENE-030131-1715]	-	-	-
ENSDARG00000007576	4211	41	0.67	39	0.67	60	0.89	39	0.52	14	46301973	46310549	-	crybb1l1	crystallin%2C beta B1%2C like 1 [Source:ZFIN%3BAcc:ZDB-GENE-100112-3]	-	-	-
ENSDARG00000007582	3479	174	3.46	144	2.97	215	3.85	213	3.41	20	98179	106012	+	olfcb1	olfactory receptor C family%2C b1 [Source:ZFIN%3BAcc:ZDB-GENE-030131-2664]	GO:0007186:G-protein coupled receptor signaling pathway;	GO:0016021:integral component of membrane;GO:0005886:plasma membrane;	GO:0004930:G-protein coupled receptor activity;
ENSDARG00000007597	1380	162	8.12	158	8.22	190	8.58	197	7.94	19	25679538	25693728	-	bloc1s4	biogenesis of lysosomal organelles complex-1%2C subunit 4%2C cappuccino [Source:ZFIN%3BAcc:ZDB-GENE-040801-215]	-	-	-
ENSDARG00000007601	6487	118	1.26	107	1.18	121	1.16	165	1.41	11	18560667	18604542	-	zmynd8	zinc finger%2C MYND-type containing 8 [Source:ZFIN%3BAcc:ZDB-GENE-041119-1]	-	-	-
ENSDARG00000007603	2529	424	11.6	318	9.03	391	9.64	433	9.52	3	53240562	53274285	+	stxbp2	syntaxin binding protein 2 [Source:ZFIN%3BAcc:ZDB-GENE-040426-2482]	GO:0006904:vesicle docking involved in exocytosis;	-	-
ENSDARG00000007614	1652	57	2.39	63	2.74	91	3.43	81	2.73	25	36960724	37071036	-	wwox	WW domain containing oxidoreductase [Source:NCBI gene%3BAcc:393887]	GO:0016055:Wnt signaling pathway;GO:0006915:apoptotic process;GO:0055114:oxidation-reduction process;	GO:0005737:cytoplasm;GO:0005634:nucleus;	GO:0016491:oxidoreductase activity;GO:0000166:nucleotide binding;
ENSDARG00000007624	1163	345	20.52	321	19.83	378	20.26	500	23.91	13	7164345	7170351	+	gins1	GINS complex subunit 1 (Psf1 homolog) [Source:ZFIN%3BAcc:ZDB-GENE-041010-184]	GO:0006260:DNA replication;	GO:0005634:nucleus;	-
ENSDARG00000007630	3617	167	3.19	162	3.22	126	2.17	201	3.09	11	543365	575786	-	mkrn2	makorin%2C ring finger protein%2C 2 [Source:NCBI gene%3BAcc:170783]	GO:0006355:regulation of transcription, DNA-templated;GO:0007399:nervous system development;GO:0030154:cell differentiation;	GO:0005622:intracellular;	GO:0008270:zinc ion binding;GO:0003676:nucleic acid binding;GO:0016874:ligase activity;
ENSDARG00000007639	4501	338	5.2	363	5.79	409	5.66	591	7.3	4	12243698	12286067	-	cnot4b	CCR4-NOT transcription complex%2C subunit 4b [Source:ZFIN%3BAcc:ZDB-GENE-040426-1164]	-	-	GO:0008270:zinc ion binding;GO:0000166:nucleotide binding;GO:0003723:RNA binding;
ENSDARG00000007654	3373	108	2.22	98	2.09	105	1.94	137	2.26	3	34766989	34801041	-	nsfa	N-ethylmaleimide-sensitive factor a [Source:ZFIN%3BAcc:ZDB-GENE-030616-37]	GO:0048914:myelination of anterior lateral line nerve axons;GO:0014044:Schwann cell development;GO:0048794:swim bladder development;GO:0045162:clustering of voltage-gated sodium channels;GO:0048929:efferent axon development in posterior lateral line nerve;GO:0048932:myelination of posterior lateral line nerve axons;GO:0048592:eye morphogenesis;GO:0051875:pigment granule localization;GO:0021854:hy…	-	GO:0017111:nucleoside-triphosphatase activity;GO:0005524:ATP binding;
ENSDARG00000007655	1293	1	0.05	2	0.11	0	0	0	0	15	28096152	28104403	+	crybb1l3	crystallin%2C beta B1%2C like 3 [Source:ZFIN%3BAcc:ZDB-GENE-070820-11]	-	-	-
ENSDARG00000007657	1298	165	8.79	165	9.13	179	8.6	148	6.34	5	47963940	47975440	-	ccnh	cyclin H [Source:ZFIN%3BAcc:ZDB-GENE-050320-13]	GO:0006355:regulation of transcription, DNA-templated;GO:0000079:regulation of cyclin-dependent protein serine/threonine kinase activity;	GO:0070985:TFIIK complex;	GO:0019901:protein kinase binding;GO:0016538:cyclin-dependent protein serine/threonine kinase regulator activity;
ENSDARG00000007663	3651	126	2.39	144	2.83	184	3.14	203	3.09	2	31891335	31937005	-	amph	amphiphysin [Source:ZFIN%3BAcc:ZDB-GENE-040426-1711]	-	GO:0005737:cytoplasm;	-
ENSDARG00000007671	3937	234	4.11	189	3.45	222	3.51	229	3.24	21	20742876	20765338	-	ghrb	growth hormone receptor b [Source:ZFIN%3BAcc:ZDB-GENE-071119-4]	-	-	-
ENSDARG00000007678	6346	698	7.61	691	7.82	743	7.3	882	7.73	1	11781544	11850353	-	ttyh3b	tweety family member 3b [Source:NCBI gene%3BAcc:798421]	GO:0006821:chloride transport;	GO:0005886:plasma membrane;GO:0034707:chloride channel complex;	GO:0005254:chloride channel activity;
ENSDARG00000007682	1309	645	34.09	607	33.31	711	33.86	891	37.86	8	23213320	23216035	+	ppdpfa	pancreatic progenitor cell differentiation and proliferation factor a [Source:NCBI gene%3BAcc:338304]	GO:0031017:exocrine pancreas development;GO:0001708:cell fate specification;GO:0008283:cell proliferation;	-	-
ENSDARG00000007691	3503	721	14.24	682	13.98	771	13.72	935	14.85	24	17364745	17400472	-	cul1b	cullin 1b [Source:ZFIN%3BAcc:ZDB-GENE-040426-2887]	GO:0006511:ubiquitin-dependent protein catabolic process;	GO:0031461:cullin-RING ubiquitin ligase complex;	GO:0031625:ubiquitin protein ligase binding;
ENSDARG00000007693	5342	518	6.71	486	6.53	533	6.22	693	7.22	17	12942021	12949754	+	nfkbiab	nuclear factor of kappa light polypeptide gene enhancer in B-cells inhibitor%2C alpha b [Source:ZFIN%3BAcc:ZDB-GENE-030131-1819]	-	-	-
ENSDARG00000007697	858	1182	95.3	1087	91	1252	90.96	1346	87.26	17	15433518	15435887	+	fabp7a	fatty acid binding protein 7%2C brain%2C a [Source:ZFIN%3BAcc:ZDB-GENE-000627-1]	GO:0006810:transport;	-	GO:0005504:fatty acid binding;GO:0005215:transporter activity;
ENSDARG00000007708	1162	4898	291.6	4828	298.44	5263	282.33	6356	304.25	21	3789839	3796461	-	nsa2	NSA2 ribosome biogenesis homolog (S. cerevisiae) [Source:ZFIN%3BAcc:ZDB-GENE-030131-488]	-	-	-
ENSDARG00000007709	2676	34	0.88	23	0.62	36	0.84	36	0.75	5	30155834	30176970	-	adamts8a	ADAM metallopeptidase with thrombospondin type 1 motif%2C 8a [Source:ZFIN%3BAcc:ZDB-GENE-060526-202]	-	-	-
ENSDARG00000007711	2062	116	3.89	107	3.73	122	3.69	158	4.26	25	3099073	3118114	+	rab3il1	RAB3A interacting protein (rabin3)-like 1 [Source:ZFIN%3BAcc:ZDB-GENE-110921-5]	-	-	-
ENSDARG00000007715	2297	0	0	2	0.06	4	0.11	1	0.02	11	11263451	11266882	-	lgsn	lengsin%2C lens protein with glutamine synthetase domain [Source:ZFIN%3BAcc:ZDB-GENE-060312-26]	GO:0002089:lens morphogenesis in camera-type eye;GO:0006542:glutamine biosynthetic process;GO:0030154:cell differentiation;	GO:0005884:actin filament;	GO:0004356:glutamate-ammonia ligase activity;
ENSDARG00000007720	3010	482	11.08	495	11.81	604	12.51	519	9.59	5	41143563	41153469	+	sub1b	SUB1 regulator of transcription b [Source:ZFIN%3BAcc:ZDB-GENE-040718-209]	GO:0006355:regulation of transcription, DNA-templated;	-	GO:0003713:transcription coactivator activity;GO:0003677:DNA binding;
ENSDARG00000007722	1633	109	4.62	89	3.91	76	2.9	123	4.19	15	499848	506010	-	nudt8	nudix (nucleoside diphosphate linked moiety X)-type motif 8 [Source:ZFIN%3BAcc:ZDB-GENE-061013-219]	-	-	GO:0016787:hydrolase activity;
ENSDARG00000007723	1026	442	29.8	392	27.44	393	23.88	604	32.74	5	36271016	36328688	-	efnb1	ephrin-B1 [Source:ZFIN%3BAcc:ZDB-GENE-010618-2]	-	GO:0016020:membrane;	-
ENSDARG00000007727	2458	132	3.72	106	3.1	149	3.78	169	3.82	16	45364153	45398408	-	rgl2	ral guanine nucleotide dissociation stimulator-like 2 [Source:ZFIN%3BAcc:ZDB-GENE-010131-1]	-	-	-
ENSDARG00000007734	1495	178	8.24	165	7.93	165	6.88	181	6.73	1	47499888	47513484	+	stn1	STN1 subunit of CST complex [Source:NCBI gene%3BAcc:393360]	GO:0010833:telomere maintenance via telomere lengthening;	GO:0000784:nuclear chromosome, telomeric region;	GO:0043047:single-stranded telomeric DNA binding;
ENSDARG00000007737	3801	250	4.55	251	4.74	226	3.71	233	3.41	20	16170848	16212016	+	zyg11	zyg-11 homolog (C. elegans) [Source:NCBI gene%3BAcc:555349]	-	-	-
ENSDARG00000007739	3311	694	14.5	655	14.21	736	13.86	699	11.74	1	1789357	1796832	+	atp1a1a.2	ATPase Na+/K+ transporting subunit alpha 1a%2C tandem duplicate 2 [Source:ZFIN%3BAcc:ZDB-GENE-001212-2]	GO:0015672:monovalent inorganic cation transport;GO:0006754:ATP biosynthetic process;GO:0048752:semicircular canal morphogenesis;	GO:0016021:integral component of membrane;	GO:0019829:cation-transporting ATPase activity;GO:0046872:metal ion binding;GO:0015077:monovalent inorganic cation transmembrane transporter activity;GO:0005524:ATP binding;
ENSDARG00000007743	3025	68	1.56	67	1.59	35	0.72	60	1.1	15	20352123	20363786	+	il15l	interleukin 15%2C like [Source:ZFIN%3BAcc:ZDB-GENE-041111-173]	GO:0006955:immune response;	GO:0005615:extracellular space;	GO:0005126:cytokine receptor binding;GO:0005125:cytokine activity;
ENSDARG00000007744	2658	2174	56.58	2211	59.75	2423	56.82	2646	55.37	15	25635326	25656331	+	tsr1	TSR1 ribosome maturation factor [Source:ZFIN%3BAcc:ZDB-GENE-030131-3762]	-	-	-
ENSDARG00000007745	3965	2726	47.56	2616	47.39	3237	50.89	3544	49.72	7	45400716	45406089	+	uqcrfs1	ubiquinol-cytochrome c reductase%2C Rieske iron-sulfur polypeptide 1 [Source:ZFIN%3BAcc:ZDB-GENE-040426-2060]	-	-	-
ENSDARG00000007751	6626	13	0.14	13	0.14	12	0.11	21	0.18	23	45845159	45860097	+	lmnl3	lamin L3 [Source:ZFIN%3BAcc:ZDB-GENE-020424-4]	-	GO:0005882:intermediate filament;	GO:0005198:structural molecule activity;
ENSDARG00000007753	3633	13	0.25	24	0.47	11	0.19	15	0.23	18	17660158	17704546	+	cpne2	copine II [Source:ZFIN%3BAcc:ZDB-GENE-030131-7896]	-	-	-
ENSDARG00000007755	1319	377	19.77	402	21.89	358	16.92	456	19.23	25	6280991	6292560	-	wdr61	WD repeat domain 61 [Source:NCBI gene%3BAcc:393827]	GO:0045944:positive regulation of transcription from RNA polymerase II promoter;GO:0032968:positive regulation of transcription elongation from RNA polymerase II promoter;	GO:0055087:Ski complex;GO:0016593:Cdc73/Paf1 complex;GO:0035327:transcriptionally active chromatin;	-
ENSDARG00000007760	1407	210	10.33	209	10.67	297	13.16	298	11.78	7	13625929	13648663	-	spg21	SPG21 abhydrolase domain containing%2C maspardin [Source:NCBI gene%3BAcc:406704]	-	GO:0005829:cytosol;GO:0030140:trans-Golgi network transport vesicle;	GO:0042609:CD4 receptor binding;
ENSDARG00000007764	3018	342	7.84	348	8.28	404	8.34	460	8.48	4	14991789	15003893	-	klhdc10	kelch domain containing 10 [Source:ZFIN%3BAcc:ZDB-GENE-040426-776]	-	-	-
ENSDARG00000007769	1980	0	0	1	0.04	0	0	0	0	7	56602521	56606752	-	sult5a1	sulfotransferase family 5A%2C member 1 [Source:ZFIN%3BAcc:ZDB-GENE-060929-978]	-	-	GO:0008146:sulfotransferase activity;
ENSDARG00000007774	5557	1318	16.41	1289	16.66	1504	16.87	1675	16.77	20	37866171	37916522	+	vash2	vasohibin 2 [Source:ZFIN%3BAcc:ZDB-GENE-041014-355]	-	-	-
ENSDARG00000007783	4580	0	0	2	0.03	1	0.01	0	0	20	19175031	19198334	+	blk	BLK proto-oncogene%2C Src family tyrosine kinase [Source:ZFIN%3BAcc:ZDB-GENE-040724-106]	-	-	-
ENSDARG00000007786	3447	709	14.23	756	15.75	767	13.87	927	14.96	1	44569282	44581937	-	tmx2b	thioredoxin-related transmembrane protein 2b [Source:NCBI gene%3BAcc:415203]	GO:0045454:cell redox homeostasis;	GO:0016021:integral component of membrane;	-
ENSDARG00000007787	1436	9	0.43	6	0.3	25	1.09	27	1.05	3	10728970	10751491	-	zgc:112965	zgc:112965 [Source:ZFIN%3BAcc:ZDB-GENE-050522-10]	-	-	-
ENSDARG00000007788	5392	58	0.74	53	0.71	75	0.87	87	0.9	25	19609713	19666107	-	atp2b1b	ATPase plasma membrane Ca2+ transporting 1b [Source:ZFIN%3BAcc:ZDB-GENE-080409-1]	GO:0048840:otolith development;GO:0070588:calcium ion transmembrane transport;GO:0060119:inner ear receptor cell development;GO:0048919:posterior lateral line neuromast development;GO:0007605:sensory perception of sound;	GO:0016021:integral component of membrane;	GO:0005388:calcium-transporting ATPase activity;GO:0046872:metal ion binding;GO:0005524:ATP binding;
ENSDARG00000007791	2883	4736	113.64	4405	109.75	5223	112.93	5857	113	5	57773222	57798096	+	ppp2r1ba	protein phosphatase 2%2C regulatory subunit A%2C beta a [Source:ZFIN%3BAcc:ZDB-GENE-040426-2700]	-	-	-
ENSDARG00000007795	1678	3686	151.96	4220	180.64	4793	178.05	4724	156.59	13	33675556	33683913	-	cst3	cystatin C (amyloid angiopathy and cerebral hemorrhage) [Source:ZFIN%3BAcc:ZDB-GENE-030131-373]	GO:0010466:negative regulation of peptidase activity;	-	GO:0004869:cysteine-type endopeptidase inhibitor activity;
ENSDARG00000007804	2637	610	16	642	17.49	691	16.33	614	12.95	1	312784	338445	-	gas6	growth arrest-specific 6 [Source:ZFIN%3BAcc:ZDB-GENE-030131-7773]	-	GO:0005576:extracellular region;	GO:0005509:calcium ion binding;
ENSDARG00000007807	3275	59	1.25	40	0.88	46	0.88	45	0.76	12	17504559	17562703	+	cyth3a	cytohesin 3a [Source:ZFIN%3BAcc:ZDB-GENE-120612-1]	-	-	-
ENSDARG00000007808	2906	196	4.67	194	4.8	245	5.26	247	4.73	13	31379784	31389661	-	zdhhc16a	zinc finger DHHC-type containing 16a [Source:NCBI gene%3BAcc:394017]	-	-	GO:0008270:zinc ion binding;
ENSDARG00000007812	4681	1408	20.81	1356	20.81	1524	20.29	1854	22.03	6	10721765	10740365	-	sp3b	Sp3b transcription factor [Source:ZFIN%3BAcc:ZDB-GENE-110815-3]	-	-	-
ENSDARG00000007813	6032	161	1.85	156	1.86	195	2.02	202	1.86	18	45862414	45887894	+	rnpepl1	arginyl aminopeptidase like 1 [Source:ZFIN%3BAcc:ZDB-GENE-030131-5522]	-	-	-
ENSDARG00000007818	2759	365	9.15	334	8.7	453	10.23	524	10.56	2	26237322	26284245	+	palm1b	paralemmin 1b [Source:ZFIN%3BAcc:ZDB-GENE-040426-1147]	GO:0008360:regulation of cell shape;	GO:0016020:membrane;	-
ENSDARG00000007823	2701	132	3.38	91	2.42	119	2.75	126	2.59	20	37794633	37800737	+	atf3	activating transcription factor 3 [Source:ZFIN%3BAcc:ZDB-GENE-040426-728]	GO:0009615:response to virus;GO:0006355:regulation of transcription, DNA-templated;	GO:0005634:nucleus;	GO:0003700:sequence-specific DNA binding transcription factor activity;GO:0043565:sequence-specific DNA binding;
ENSDARG00000007824	9538	62	0.45	47	0.35	79	0.52	92	0.54	11	39672874	39926872	+	camta1b	calmodulin binding transcription activator 1b [Source:ZFIN%3BAcc:ZDB-GENE-080229-1]	-	-	-
ENSDARG00000007825	2093	258	8.53	232	7.96	284	8.46	391	10.39	18	19419120	19451165	+	map2k1	mitogen-activated protein kinase kinase 1 [Source:ZFIN%3BAcc:ZDB-GENE-040426-2759]	GO:0006468:protein phosphorylation;	-	GO:0005524:ATP binding;GO:0004674:protein serine/threonine kinase activity;
ENSDARG00000007836	2083	19793	657.36	17784	613.24	17847	534.07	20526	548.1	5	44804791	44810920	+	ctsla	cathepsin La [Source:ZFIN%3BAcc:ZDB-GENE-030131-106]	GO:0006508:proteolysis;	-	GO:0008234:cysteine-type peptidase activity;
ENSDARG00000007842	4346	0	0	1	0.02	2	0.03	3	0.04	16	32820327	32837806	-	MCHR2	si:dkey-165n16.5 [Source:ZFIN%3BAcc:ZDB-GENE-100922-121]	-	-	-
ENSDARG00000007856	1345	2	0.1	4	0.21	3	0.14	4	0.17	10	35952532	35959571	+	rtn4rl1a	reticulon 4 receptor-like 1a [Source:ZFIN%3BAcc:ZDB-GENE-091118-38]	-	-	-
ENSDARG00000007863	3575	2063	39.92	2008	40.34	2221	38.73	2711	42.18	19	20177208	20191378	+	tra2a	transformer 2 alpha homolog [Source:ZFIN%3BAcc:ZDB-GENE-040426-1391]	-	-	GO:0003676:nucleic acid binding;GO:0000166:nucleotide binding;
ENSDARG00000007864	1411	0	0	1	0.05	0	0	1	0.04	14	21005372	21007653	+	pimr195	Pim proto-oncogene%2C serine/threonine kinase%2C related 195 [Source:ZFIN%3BAcc:ZDB-GENE-141216-224]	-	-	-
ENSDARG00000007867	2241	754	23.28	650	20.83	787	21.89	993	24.65	23	33718602	33729552	+	dazap2	DAZ associated protein 2 [Source:ZFIN%3BAcc:ZDB-GENE-030131-3036]	-	-	-
ENSDARG00000007869	2680	328	8.47	285	7.64	356	8.28	410	8.51	20	38201644	38241859	+	ehd3	EH-domain containing 3 [Source:ZFIN%3BAcc:ZDB-GENE-041014-352]	-	-	GO:0003924:GTPase activity;GO:0005509:calcium ion binding;GO:0005525:GTP binding;
ENSDARG00000007885	2029	52	1.77	54	1.91	70	2.15	70	1.92	13	26703897	26780797	+	fancl	FA complementation group L [Source:ZFIN%3BAcc:ZDB-GENE-040426-1045]	GO:0006281:DNA repair;GO:0048599:oocyte development;	GO:0043240:Fanconi anaemia nuclear complex;	GO:0008270:zinc ion binding;GO:0004842:ubiquitin-protein transferase activity;
ENSDARG00000007886	3321	261	5.44	250	5.41	304	5.71	341	5.71	20	51237646	51267192	-	slc35b2	solute carrier family 35 member B2 [Source:ZFIN%3BAcc:ZDB-GENE-050213-1]	GO:0042476:odontogenesis;GO:0055085:transmembrane transport;GO:0006024:glycosaminoglycan biosynthetic process;GO:0051216:cartilage development;GO:0030166:proteoglycan biosynthetic process;GO:0001649:osteoblast differentiation;GO:0031290:retinal ganglion cell axon guidance;GO:0030198:extracellular matrix organization;	GO:0016021:integral component of membrane;	-
ENSDARG00000007891	2771	901	22.49	903	23.41	943	21.21	978	19.63	12	27462225	27469267	+	meox1	mesenchyme homeobox 1 [Source:NCBI gene%3BAcc:436723]	-	-	-
ENSDARG00000007892	1410	208	10.21	203	10.34	228	10.08	222	8.76	13	24380132	24383805	+	pdcd2	programmed cell death 2 [Source:ZFIN%3BAcc:ZDB-GENE-040426-1236]	-	GO:0005737:cytoplasm;	GO:0008270:zinc ion binding;
ENSDARG00000007901	2371	1235	36.03	1216	36.84	1441	37.88	1891	44.36	20	49081967	49103317	+	crnkl1	crooked neck pre-mRNA splicing factor 1 [Source:ZFIN%3BAcc:ZDB-GENE-040426-694]	-	-	-
ENSDARG00000007906	14302	5	0.02	3	0.02	3	0.01	3	0.01	12	16132612	16229402	+	lrp2b	low density lipoprotein receptor-related protein 2b [Source:ZFIN%3BAcc:ZDB-GENE-111115-1]	-	-	-
ENSDARG00000007912	6041	51	0.58	50	0.59	123	1.27	120	1.1	21	14253404	14310159	-	si:ch211-196i2.1	si:ch211-196i2.1 [Source:ZFIN%3BAcc:ZDB-GENE-091204-150]	-	-	-
ENSDARG00000007916	2130	317	10.3	295	9.95	285	8.34	351	9.17	3	25059502	25086986	-	xpnpep3	X-prolyl aminopeptidase 3%2C mitochondrial [Source:ZFIN%3BAcc:ZDB-GENE-040426-2076]	GO:0009987:cellular process;GO:0007369:gastrulation;	-	GO:0030145:manganese ion binding;GO:0004177:aminopeptidase activity;
ENSDARG00000007918	3939	732	12.86	730	13.31	744	11.77	893	12.61	17	22760126	22947117	+	ttc27	tetratricopeptide repeat domain 27 [Source:ZFIN%3BAcc:ZDB-GENE-030102-1]	-	-	-
ENSDARG00000007923	3064	658	14.86	523	12.26	679	13.81	763	13.85	8	28398780	28408410	-	ptpn1	protein tyrosine phosphatase non-receptor type 1 [Source:ZFIN%3BAcc:ZDB-GENE-980605-23]	GO:0006470:protein dephosphorylation;	-	GO:0004725:protein tyrosine phosphatase activity;
ENSDARG00000007941	1475	146	6.85	165	8.03	193	8.16	228	8.6	1	40909750	40911332	-	hmx4	H6 family homeobox 4 [Source:ZFIN%3BAcc:ZDB-GENE-060825-142]	GO:0006355:regulation of transcription, DNA-templated;GO:1900052:regulation of retinoic acid biosynthetic process;	GO:0005634:nucleus;	GO:0043565:sequence-specific DNA binding;GO:0003700:sequence-specific DNA binding transcription factor activity;
ENSDARG00000007943	4348	545	8.67	510	8.43	545	7.81	578	7.39	19	7432710	7441948	-	gabpb2a	GA binding protein transcription factor subunit beta 2a [Source:ZFIN%3BAcc:ZDB-GENE-030131-5733]	-	-	-
ENSDARG00000007944	2074	70	2.33	66	2.29	86	2.58	109	2.92	5	56268436	56274174	+	lhx1b	LIM homeobox 1b [Source:ZFIN%3BAcc:ZDB-GENE-980526-116]	GO:0006355:regulation of transcription, DNA-templated;	GO:0005634:nucleus;	GO:0003700:sequence-specific DNA binding transcription factor activity;GO:0043565:sequence-specific DNA binding;GO:0008270:zinc ion binding;
ENSDARG00000007950	4484	1	0.02	2	0.03	0	0	5	0.06	25	1343161	1426876	-	itga11b	integrin%2C alpha 11b [Source:ZFIN%3BAcc:ZDB-GENE-071009-4]	-	-	-
ENSDARG00000007955	3955	2268	39.67	2161	39.25	2774	43.72	3001	42.21	11	1337620	1392468	-	iars1	isoleucyl-tRNA synthetase 1 [Source:ZFIN%3BAcc:ZDB-GENE-030131-6325]	-	-	-
ENSDARG00000007959	2317	1135	33.89	1125	34.88	1088	29.27	1351	32.43	16	20871015	20889516	+	hibadhb	3-hydroxyisobutyrate dehydrogenase b [Source:ZFIN%3BAcc:ZDB-GENE-040426-1582]	GO:0006098:pentose-phosphate shunt;GO:0006573:valine metabolic process;	-	GO:0051287:NAD binding;GO:0008442:3-hydroxyisobutyrate dehydrogenase activity;GO:0004616:phosphogluconate dehydrogenase (decarboxylating) activity;
ENSDARG00000007960	4736	22380	326.91	24154	366.33	27732	365	32799	385.21	14	6962271	6968589	+	hnrnpaba	heterogeneous nuclear ribonucleoprotein A/Ba [Source:ZFIN%3BAcc:ZDB-GENE-030131-185]	-	GO:0030529:ribonucleoprotein complex;	GO:0003676:nucleic acid binding;GO:0000166:nucleotide binding;GO:0097159:organic cyclic compound binding;GO:1901363:heterocyclic compound binding;
ENSDARG00000007971	918	721	54.33	732	57.27	802	54.46	973	58.95	19	7835025	7838232	+	cks1b	CDC28 protein kinase regulatory subunit 1B [Source:ZFIN%3BAcc:ZDB-GENE-040801-112]	GO:0007049:cell cycle;	-	GO:0016538:cyclin-dependent protein serine/threonine kinase regulator activity;
ENSDARG00000007975	1606	70	3.02	71	3.18	85	3.3	72	2.49	25	3058924	3066067	+	fth1b	ferritin%2C heavy polypeptide 1b [Source:ZFIN%3BAcc:ZDB-GENE-040912-30]	GO:0006879:cellular iron ion homeostasis;GO:0006826:iron ion transport;GO:0055114:oxidation-reduction process;	-	GO:0016491:oxidoreductase activity;GO:0008199:ferric iron binding;
ENSDARG00000007976	10037	716	4.93	560	4.01	694	4.31	797	4.42	18	29968205	30021479	-	si:ch211-220f16.2	si:ch211-220f16.2 [Source:ZFIN%3BAcc:ZDB-GENE-070912-199]	-	-	-
ENSDARG00000007982	1858	124	4.62	91	3.52	127	4.26	190	5.69	18	38755023	38760271	+	onecut1	one cut homeobox 1 [Source:ZFIN%3BAcc:ZDB-GENE-040426-1469]	GO:0035622:intrahepatic bile duct development;GO:0006355:regulation of transcription, DNA-templated;	GO:0005634:nucleus;	GO:0043565:sequence-specific DNA binding;GO:0003700:sequence-specific DNA binding transcription factor activity;
ENSDARG00000007988	2765	164	4.1	178	4.62	173	3.9	221	4.45	23	28770225	28796157	+	masp2	mannan-binding lectin serine peptidase 2 [Source:ZFIN%3BAcc:ZDB-GENE-060130-154]	GO:0006956:complement activation;GO:0006508:proteolysis;	GO:0005576:extracellular region;	GO:0004252:serine-type endopeptidase activity;GO:0005509:calcium ion binding;
ENSDARG00000007989	654	641	67.8	641	70.4	714	68.05	865	73.57	7	24205034	24207788	+	nedd8	NEDD8 ubiquitin like modifier [Source:ZFIN%3BAcc:ZDB-GENE-030616-588]	-	-	-
ENSDARG00000007990	1389	34	1.69	36	1.86	33	1.48	37	1.48	18	45594085	45617146	-	wt1b	WT1 transcription factor b [Source:ZFIN%3BAcc:ZDB-GENE-050420-319]	GO:0006355:regulation of transcription, DNA-templated;GO:0048793:pronephros development;	GO:0005634:nucleus;	GO:0008270:zinc ion binding;GO:0003676:nucleic acid binding;
ENSDARG00000007996	5415	749	9.57	752	9.97	895	10.3	1007	10.34	9	34319333	34378674	+	pou2f1b	POU class 2 homeobox 1b [Source:ZFIN%3BAcc:ZDB-GENE-030131-2422]	-	-	GO:0003677:DNA binding;
ENSDARG00000008010	861	1	0.08	0	0	3	0.22	4	0.26	23	29823286	29824146	-	zgc:194189	zgc:194189 [Source:ZFIN%3BAcc:ZDB-GENE-081022-71]	GO:0006355:regulation of transcription, DNA-templated;	GO:0005634:nucleus;	GO:0003700:sequence-specific DNA binding transcription factor activity;GO:0043565:sequence-specific DNA binding;
ENSDARG00000008014	1682	135	5.55	127	5.42	143	5.3	122	4.03	16	43000828	43011501	-	nudt17	nudix (nucleoside diphosphate linked moiety X)-type motif 17 [Source:NCBI gene%3BAcc:556651]	-	-	GO:0016787:hydrolase activity;GO:0046872:metal ion binding;
ENSDARG00000008019	2739	2	0.05	4	0.1	8	0.18	5	0.1	25	19695652	19715136	+	mxg	myxovirus (influenza virus) resistance G [Source:ZFIN%3BAcc:ZDB-GENE-030721-10]	-	-	GO:0003924:GTPase activity;GO:0005525:GTP binding;
ENSDARG00000008020	871	257	20.41	249	20.53	308	22.04	332	21.2	21	40045224	40049642	-	med31	mediator complex subunit 31 [Source:NCBI gene%3BAcc:436690]	GO:0006355:regulation of transcription, DNA-templated;	GO:0016592:mediator complex;	GO:0001104:RNA polymerase II transcription cofactor activity;
ENSDARG00000008022	3197	611	13.22	622	13.97	707	13.78	819	14.25	7	31976764	32021853	-	kif18a	kinesin family member 18A [Source:ZFIN%3BAcc:ZDB-GENE-040426-862]	-	-	-
ENSDARG00000008026	5542	252	3.15	245	3.18	295	3.32	406	4.07	5	28915389	28970059	-	niban2b	niban apoptosis regulator 2b [Source:ZFIN%3BAcc:ZDB-GENE-030131-6218]	-	-	GO:0005543:phospholipid binding;
ENSDARG00000008029	2719	3	0.08	1	0.03	1	0.02	0	0	20	35484070	35496459	+	mep1a.2	meprin A%2C alpha (PABA peptide hydrolase)%2C tandem duplicate 2 [Source:ZFIN%3BAcc:ZDB-GENE-041001-208]	GO:0045766:positive regulation of angiogenesis;GO:0006508:proteolysis;	GO:0016020:membrane;	GO:0004222:metalloendopeptidase activity;GO:0008270:zinc ion binding;
ENSDARG00000008030	2957	2083	48.73	1846	44.84	1993	42.01	2566	48.27	6	1787160	1799561	+	myl9b	myosin%2C light chain 9b%2C regulatory [Source:ZFIN%3BAcc:ZDB-GENE-040426-2296]	-	-	GO:0005509:calcium ion binding;
ENSDARG00000008032	4754	1564	22.76	1515	22.89	1732	22.71	2217	25.94	5	20453874	20481389	+	sart3	spliceosome associated factor 3%2C U4/U6 recycling protein [Source:NCBI gene%3BAcc:558581]	GO:0030098:lymphocyte differentiation;GO:0048538:thymus development;GO:0031017:exocrine pancreas development;GO:0000245:spliceosomal complex assembly;	GO:0005622:intracellular;	GO:0003676:nucleic acid binding;GO:0000166:nucleotide binding;
ENSDARG00000008034	3561	577	11.21	570	11.5	873	15.28	988	15.43	11	25782721	25829712	-	skib	v-ski avian sarcoma viral oncogene homolog b [Source:ZFIN%3BAcc:ZDB-GENE-990715-10]	GO:0000122:negative regulation of transcription from RNA polymerase II promoter;GO:0030512:negative regulation of transforming growth factor beta receptor signaling pathway;GO:0030514:negative regulation of BMP signaling pathway;GO:0042981:regulation of apoptotic process;GO:0051216:cartilage development;GO:0001947:heart looping;GO:0009953:dorsal/ventral pattern formation;	GO:0005737:cytoplasm;GO:0005634:nucleus;	GO:0000166:nucleotide binding;GO:0046332:SMAD binding;
ENSDARG00000008049	865	1571	125.64	1472	122.23	1591	114.65	1978	127.19	22	10540446	10541712	-	si:dkey-42i9.4	si:dkey-42i9.4 [Source:ZFIN%3BAcc:ZDB-GENE-030131-8398]	-	-	-
ENSDARG00000008060	3240	5	0.11	0	0	3	0.06	0	0	20	39283849	39300730	+	scara3	scavenger receptor class A%2C member 3 [Source:ZFIN%3BAcc:ZDB-GENE-041014-317]	-	-	-
ENSDARG00000008068	2173	413	13.15	469	15.5	491	14.08	437	11.19	1	19759370	19764038	-	tma16	translation machinery associated 16 homolog [Source:NCBI gene%3BAcc:553647]	-	-	-
ENSDARG00000008075	986	13	0.91	19	1.38	10	0.63	7	0.39	19	40167363	40175800	-	illr4	immune-related%2C lectin-like receptor 4 [Source:ZFIN%3BAcc:ZDB-GENE-050311-5]	-	-	-
ENSDARG00000008095	2512	0	0	0	0	0	0	0	0	18	33212589	33216757	+	olfcd1	olfactory receptor C family%2C d1 [Source:ZFIN%3BAcc:ZDB-GENE-100721-9]	-	-	-
ENSDARG00000008097	1546	1152	51.55	1160	53.89	1241	50.04	1309	47.1	10	1686975	1697074	-	srsf9	serine and arginine rich splicing factor 9 [Source:ZFIN%3BAcc:ZDB-GENE-040426-2397]	-	-	GO:0097159:organic cyclic compound binding;GO:1901363:heterocyclic compound binding;
ENSDARG00000008098	1546	7	0.31	13	0.6	9	0.36	6	0.22	12	17033494	17035339	-	ifit9	interferon-induced protein with tetratricopeptide repeats 9 [Source:ZFIN%3BAcc:ZDB-GENE-121214-233]	-	-	-
ENSDARG00000008100	3025	102	2.33	63	1.5	84	1.73	106	1.95	7	38315647	38340674	-	slc7a10a	solute carrier family 7 member 10a [Source:ZFIN%3BAcc:ZDB-GENE-080116-1]	GO:0003333:amino acid transmembrane transport;	GO:0016021:integral component of membrane;	GO:0015171:amino acid transmembrane transporter activity;
ENSDARG00000008105	1475	530	24.86	513	24.98	625	26.41	680	25.64	3	19665319	19682819	+	mettl2a	methyltransferase like 2A [Source:NCBI gene%3BAcc:100006618]	GO:0032259:methylation;	-	GO:0008168:methyltransferase activity;
ENSDARG00000008107	3067	241	5.44	200	4.68	266	5.41	316	5.73	23	39346774	39450700	+	src	v-src avian sarcoma (Schmidt-Ruppin A-2) viral oncogene homolog [Source:NCBI gene%3BAcc:325084]	-	-	-
ENSDARG00000008119	1923	435	15.65	443	16.55	419	13.58	513	14.84	20	29676874	29683783	-	si:ch211-195d17.2	si:ch211-195d17.2 [Source:ZFIN%3BAcc:ZDB-GENE-030131-513]	-	-	-
ENSDARG00000008127	6041	23	0.26	14	0.17	41	0.42	41	0.38	12	6566233	6905375	-	pcdh15b	protocadherin-related 15b [Source:ZFIN%3BAcc:ZDB-GENE-050214-1]	GO:0007156:homophilic cell adhesion via plasma membrane adhesion molecules;GO:0050908:detection of light stimulus involved in visual perception;GO:0001654:eye development;	GO:0005886:plasma membrane;GO:0016021:integral component of membrane;	GO:0005509:calcium ion binding;
ENSDARG00000008131	1775	390	15.2	402	16.27	479	16.82	577	18.08	1	46194333	46196107	+	sox1b	SRY-box transcription factor 1b [Source:NCBI gene%3BAcc:562710]	GO:0051091:positive regulation of sequence-specific DNA binding transcription factor activity;GO:0007275:multicellular organismal development;	GO:0005667:transcription factor complex;	GO:0003677:DNA binding;GO:0003700:sequence-specific DNA binding transcription factor activity;
ENSDARG00000008133	1863	26	0.97	34	1.31	21	0.7	29	0.87	18	17483557	17485419	-	foxl1	forkhead box L1 [Source:ZFIN%3BAcc:ZDB-GENE-040426-1181]	GO:0007495:visceral mesoderm-endoderm interaction involved in midgut development;GO:0006357:regulation of transcription from RNA polymerase II promoter;GO:0043010:camera-type eye development;GO:0051216:cartilage development;GO:0007389:pattern specification process;GO:0035138:pectoral fin morphogenesis;GO:0045892:negative regulation of transcription, DNA-templated;GO:0030111:regulation of Wnt sign…	GO:0005667:transcription factor complex;	GO:0003705:RNA polymerase II distal enhancer sequence-specific DNA binding transcription factor activity;GO:0043565:sequence-specific DNA binding;GO:0003690:double-stranded DNA binding;GO:0008134:transcription factor binding;GO:0008301:DNA binding, bending;
ENSDARG00000008140	2850	18	0.44	20	0.5	28	0.61	25	0.49	18	34362608	34536067	+	kcnab1a	potassium voltage-gated channel%2C shaker-related subfamily%2C beta member 1 a [Source:ZFIN%3BAcc:ZDB-GENE-050327-79]	-	-	-
ENSDARG00000008141	3438	1145	23.04	980	20.47	1220	22.12	1384	22.39	6	51549203	51573975	-	rbl1	retinoblastoma-like 1 (p107) [Source:ZFIN%3BAcc:ZDB-GENE-030131-8179]	GO:0051726:regulation of cell cycle;	GO:0005634:nucleus;	-
ENSDARG00000008142	2909	699	16.62	723	17.85	736	15.77	866	16.56	23	1661743	1698431	+	stxbp3	syntaxin binding protein 3 [Source:ZFIN%3BAcc:ZDB-GENE-040426-2833]	GO:0006904:vesicle docking involved in exocytosis;	-	-
ENSDARG00000008153	4891	1608	22.74	1607	23.6	1755	22.37	1912	21.74	5	51947150	51998708	-	serinc5	serine incorporator 5 [Source:NCBI gene%3BAcc:406835]	GO:0008654:phospholipid biosynthetic process;	GO:0005789:endoplasmic reticulum membrane;GO:0016021:integral component of membrane;	-
ENSDARG00000008155	1997	731	25.32	714	25.68	832	25.97	776	21.61	21	25399133	25416391	-	sms	spermine synthase [Source:ZFIN%3BAcc:ZDB-GENE-040625-150]	GO:0006597:spermine biosynthetic process;	-	GO:0016768:spermine synthase activity;
ENSDARG00000008164	3539	16	0.31	5	0.1	17	0.3	26	0.41	24	7708652	7714562	+	btr33	bloodthirsty-related gene family%2C member 33 [Source:ZFIN%3BAcc:ZDB-GENE-090512-4]	-	-	-
ENSDARG00000008165	1542	39	1.75	30	1.4	45	1.82	47	1.7	16	41993551	42004544	-	caspa	caspase a [Source:ZFIN%3BAcc:ZDB-GENE-000616-3]	GO:0006508:proteolysis;GO:0048703:embryonic viscerocranium morphogenesis;GO:0043065:positive regulation of apoptotic process;	-	GO:0032090:Pyrin domain binding;GO:0004197:cysteine-type endopeptidase activity;
ENSDARG00000008170	2376	403	11.73	520	15.72	475	12.46	528	12.36	10	42358426	42372811	+	dbnla	drebrin-like a [Source:ZFIN%3BAcc:ZDB-GENE-040704-42]	-	GO:0005622:intracellular;	GO:0003779:actin binding;
ENSDARG00000008174	1507	102	4.68	110	5.24	202	8.36	292	10.78	3	23768898	23771142	+	hoxb1a	homeobox B1a [Source:NCBI gene%3BAcc:30337]	GO:0021561:facial nerve development;GO:0006355:regulation of transcription, DNA-templated;GO:0021570:rhombomere 4 development;	GO:0005634:nucleus;	GO:0043565:sequence-specific DNA binding;GO:0003700:sequence-specific DNA binding transcription factor activity;
ENSDARG00000008182	1674	1	0.04	1	0.04	0	0	0	0	10	22110842	22117121	-	si:ch73-111e15.1	si:ch73-111e15.1 [Source:ZFIN%3BAcc:ZDB-GENE-110411-28]	-	-	-
ENSDARG00000008184	7182	1446	13.93	1294	12.94	1433	12.44	1880	14.56	20	51758426	51831816	-	mia3	MIA SH3 domain ER export factor 3 [Source:ZFIN%3BAcc:ZDB-GENE-041014-270]	-	-	-
ENSDARG00000008186	5325	37	0.48	22	0.3	37	0.43	20	0.21	10	5533843	5581487	-	syk	spleen tyrosine kinase [Source:ZFIN%3BAcc:ZDB-GENE-040702-3]	GO:0006468:protein phosphorylation;GO:0035556:intracellular signal transduction;GO:0001946:lymphangiogenesis;GO:0090050:positive regulation of cell migration involved in sprouting angiogenesis;	GO:0005737:cytoplasm;	GO:0005524:ATP binding;GO:0004715:non-membrane spanning protein tyrosine kinase activity;
ENSDARG00000008188	3009	4103	94.33	3938	94	4495	93.12	6270	115.9	7	22809905	22820816	+	sf1	splicing factor 1 [Source:ZFIN%3BAcc:ZDB-GENE-030131-2492]	GO:0060041:retina development in camera-type eye;GO:0022402:cell cycle process;GO:0050810:regulation of steroid biosynthetic process;GO:0033327:Leydig cell differentiation;GO:0030238:male sex determination;GO:0048662:negative regulation of smooth muscle cell proliferation;	GO:0005681:spliceosomal complex;GO:0005730:nucleolus;	GO:0003723:RNA binding;GO:0008270:zinc ion binding;
ENSDARG00000008191	1436	12	0.58	7	0.35	6	0.26	18	0.7	2	42176922	42187118	+	tmeff1a	transmembrane protein with EGF-like and two follistatin-like domains 1a [Source:ZFIN%3BAcc:ZDB-GENE-070912-294]	-	-	-
ENSDARG00000008192	2842	211	5.14	187	4.73	252	5.53	252	4.93	17	23554932	23575465	+	pank1a	pantothenate kinase 1a [Source:ZFIN%3BAcc:ZDB-GENE-040426-2846]	GO:0015937:coenzyme A biosynthetic process;	-	GO:0005524:ATP binding;GO:0004594:pantothenate kinase activity;
ENSDARG00000008200	7012	716	7.06	707	7.24	816	7.25	986	7.82	17	24445818	24474703	+	ugp2b	UDP-glucose pyrophosphorylase 2b [Source:ZFIN%3BAcc:ZDB-GENE-030131-6352]	GO:0008152:metabolic process;	-	GO:0016779:nucleotidyltransferase activity;
ENSDARG00000008203	1941	23	0.82	19	0.7	36	1.16	26	0.75	17	42274240	42278340	+	pax1a	paired box 1a [Source:ZFIN%3BAcc:ZDB-GENE-070112-182]	GO:0007275:multicellular organismal development;GO:0006355:regulation of transcription, DNA-templated;	GO:0005634:nucleus;	GO:0003677:DNA binding;
ENSDARG00000008209	4144	11	0.18	17	0.29	12	0.18	26	0.35	20	30445971	30574029	+	myt1la	myelin transcription factor 1-like%2C a [Source:ZFIN%3BAcc:ZDB-GENE-041001-172]	-	-	-
ENSDARG00000008212	1989	17	0.59	13	0.47	5	0.16	6	0.17	17	16336278	16342388	-	kcnk13a	potassium channel%2C subfamily K%2C member 13a [Source:ZFIN%3BAcc:ZDB-GENE-080219-46]	GO:0071805:potassium ion transmembrane transport;	GO:0016021:integral component of membrane;	GO:0005267:potassium channel activity;
ENSDARG00000008218	2991	358	8.28	320	7.68	350	7.29	357	6.64	20	54349333	54360183	+	znf410	zinc finger protein 410 [Source:ZFIN%3BAcc:ZDB-GENE-040426-1817]	-	GO:0005622:intracellular;	GO:0008270:zinc ion binding;GO:0003676:nucleic acid binding;
ENSDARG00000008219	525	2	0.26	0	0	2	0.24	0	0	6	72040	72996	+	crygm4	crystallin%2C gamma M4 [Source:ZFIN%3BAcc:ZDB-GENE-120312-2]	-	-	-
ENSDARG00000008224	4625	1673	25.02	1518	23.58	1845	24.87	2106	25.33	7	41757462	41812355	-	vps35	VPS35 retromer complex component [Source:ZFIN%3BAcc:ZDB-GENE-030131-2042]	-	-	-
ENSDARG00000008235	3836	269	4.85	199	3.73	285	4.63	293	4.25	4	2548783	2637710	-	cog5	component of oligomeric golgi complex 5 [Source:ZFIN%3BAcc:ZDB-GENE-041210-47]	GO:0006891:intra-Golgi vesicle-mediated transport;	GO:0017119:Golgi transport complex;	-
ENSDARG00000008237	2371	2742	80	2665	80.73	3139	82.52	3604	84.55	23	34030550	34043651	+	sars1	seryl-tRNA synthetase 1 [Source:NCBI gene%3BAcc:445405]	GO:0006434:seryl-tRNA aminoacylation;GO:0001569:patterning of blood vessels;	GO:0005737:cytoplasm;	GO:0004828:serine-tRNA ligase activity;GO:0005524:ATP binding;
ENSDARG00000008238	7789	113	1	128	1.18	130	1.04	149	1.06	13	11714869	11743973	-	manba	mannosidase%2C beta A%2C lysosomal [Source:ZFIN%3BAcc:ZDB-GENE-040426-721]	GO:0005975:carbohydrate metabolic process;	-	GO:0004553:hydrolase activity, hydrolyzing O-glycosyl compounds;
ENSDARG00000008239	1726	208	8.34	160	6.66	171	6.18	155	5	17	42812265	42842863	-	mocs3	molybdenum cofactor synthesis 3 [Source:NCBI gene%3BAcc:393095]	GO:0018192:enzyme active site formation via L-cysteine persulfide;GO:0034227:tRNA thio-modification;GO:0006777:Mo-molybdopterin cofactor biosynthetic process;GO:0002098:tRNA wobble uridine modification;	GO:0005829:cytosol;	GO:0016779:nucleotidyltransferase activity;GO:0004792:thiosulfate sulfurtransferase activity;GO:0046872:metal ion binding;GO:0042292:URM1 activating enzyme activity;GO:0005524:ATP binding;
ENSDARG00000008243	6359	4995	54.34	5067	57.23	5651	55.39	6369	55.71	10	25325808	25343521	-	cct8	chaperonin containing TCP1%2C subunit 8 (theta) [Source:ZFIN%3BAcc:ZDB-GENE-040426-876]	GO:0006457:protein folding;GO:0035095:behavioral response to nicotine;	GO:0005737:cytoplasm;	GO:0005524:ATP binding;GO:0051082:unfolded protein binding;
ENSDARG00000008247	1473	511	24	424	20.68	585	24.76	704	26.58	10	37083654	37126562	+	vezf1a	vascular endothelial zinc finger 1a [Source:ZFIN%3BAcc:ZDB-GENE-040108-4]	-	-	-
ENSDARG00000008249	4604	8	0.12	18	0.28	13	0.18	18	0.22	20	36066408	36107422	-	ptchd4	patched domain containing 4 [Source:NCBI gene%3BAcc:564097]	-	-	-
ENSDARG00000008255	4284	2831	45.72	2669	44.75	2938	42.75	3528	45.81	21	32757601	32781612	-	cnot6a	CCR4-NOT transcription complex%2C subunit 6a [Source:ZFIN%3BAcc:ZDB-GENE-030131-2768]	-	-	-
ENSDARG00000008263	1966	19	0.67	27	0.99	83	2.63	86	2.43	23	18103080	18114890	+	mfsd4ab	major facilitator superfamily domain containing 4Ab [Source:NCBI gene%3BAcc:558146]	GO:0055085:transmembrane transport;	GO:0016021:integral component of membrane;	-
ENSDARG00000008275	6341	294	3.21	247	2.8	294	2.89	311	2.73	24	25760986	25788841	-	klhl24b	kelch-like family member 24b [Source:ZFIN%3BAcc:ZDB-GENE-040426-1185]	-	-	-
ENSDARG00000008278	3411	1962	39.79	2000	42.12	2142	39.14	2691	43.88	7	24979833	24995640	-	rcor2	REST corepressor 2 [Source:NCBI gene%3BAcc:402934]	GO:0006355:regulation of transcription, DNA-templated;	GO:0005634:nucleus;	GO:0003677:DNA binding;GO:0003682:chromatin binding;
ENSDARG00000008279	1425	103	5	91	4.59	114	4.99	168	6.56	1	45839927	45856178	+	map2k7	mitogen-activated protein kinase kinase 7 [Source:ZFIN%3BAcc:ZDB-GENE-090312-186]	GO:0006468:protein phosphorylation;GO:0001756:somitogenesis;	-	GO:0005524:ATP binding;GO:0004674:protein serine/threonine kinase activity;
ENSDARG00000008287	2273	804	24.47	739	23.35	874	23.97	1077	26.36	1	18575747	18592068	-	fam114a1	family with sequence similarity 114 member A1 [Source:ZFIN%3BAcc:ZDB-GENE-070410-52]	-	-	-
ENSDARG00000008292	2175	7070	224.87	7088	234.08	7923	227.07	9274	237.17	24	16983269	17002950	+	eif2s3	eukaryotic translation initiation factor 2%2C subunit 3 gamma [Source:NCBI gene%3BAcc:327341]	GO:0006413:translational initiation;	-	GO:0003924:GTPase activity;GO:0005525:GTP binding;GO:0003743:translation initiation factor activity;
ENSDARG00000008305	1641	229	9.65	222	9.72	183	6.95	185	6.27	1	38193147	38195012	-	hand2	heart and neural crest derivatives expressed 2 [Source:NCBI gene%3BAcc:58150]	GO:0030878:thyroid gland development;GO:0006355:regulation of transcription, DNA-templated;GO:0035118:embryonic pectoral fin morphogenesis;GO:0003144:embryonic heart tube formation;GO:0030859:polarized epithelial cell differentiation;GO:0071908:determination of intestine left/right asymmetry;GO:0060047:heart contraction;GO:0003342:proepicardium development;GO:0010002:cardioblast differentiation;G…	GO:0005634:nucleus;	GO:0003677:DNA binding;GO:0046983:protein dimerization activity;
ENSDARG00000008306	4102	81	1.37	94	1.65	106	1.61	86	1.17	22	10110358	10121880	-	rdh5	retinol dehydrogenase 5 (11-cis/9-cis) [Source:ZFIN%3BAcc:ZDB-GENE-050208-411]	GO:0001754:eye photoreceptor cell differentiation;GO:0060041:retina development in camera-type eye;GO:0035238:vitamin A biosynthetic process;	-	GO:0016491:oxidoreductase activity;GO:0000166:nucleotide binding;
ENSDARG00000008310	2793	723	17.91	691	17.77	722	16.11	843	16.79	6	42409082	42418225	-	ip6k2a	inositol hexakisphosphate kinase 2a [Source:ZFIN%3BAcc:ZDB-GENE-030131-760]	GO:0045880:positive regulation of smoothened signaling pathway;GO:0016310:phosphorylation;GO:0007227:signal transduction downstream of smoothened;	GO:0005622:intracellular;	GO:0008440:inositol-1,4,5-trisphosphate 3-kinase activity;
ENSDARG00000008322	5656	282	3.45	249	3.16	301	3.32	381	3.75	7	39255781	39360325	-	ambra1a	autophagy/beclin-1 regulator 1a [Source:ZFIN%3BAcc:ZDB-GENE-111104-2]	-	-	-
ENSDARG00000008329	3385	15	0.31	14	0.3	22	0.41	15	0.25	8	6967108	7023196	+	asic1a	acid-sensing (proton-gated) ion channel 1a [Source:NCBI gene%3BAcc:791696]	GO:0006814:sodium ion transport;	GO:0005887:integral component of plasma membrane;	GO:0015280:ligand-gated sodium channel activity;
ENSDARG00000008333	1151	817	49.1	841	52.48	784	42.46	879	42.48	2	118225	122164	-	znfl2a	zinc finger-like gene 2a [Source:ZFIN%3BAcc:ZDB-GENE-030828-7]	-	GO:0005622:intracellular;	GO:0008270:zinc ion binding;GO:0003676:nucleic acid binding;GO:0005488:binding;
ENSDARG00000008363	1838	915	34.44	939	36.7	1001	33.95	1110	33.59	16	29586004	29587969	+	mcl1b	MCL1 apoptosis regulator%2C BCL2 family member b [Source:ZFIN%3BAcc:ZDB-GENE-030825-1]	GO:0043009:chordate embryonic development;GO:0043154:negative regulation of cysteine-type endopeptidase activity involved in apoptotic process;GO:0043066:negative regulation of apoptotic process;	-	-
ENSDARG00000008370	3647	2649	50.25	2526	49.75	2929	50.06	3634	55.42	3	36173203	36210344	-	csnk1da	casein kinase 1%2C delta a [Source:NCBI gene%3BAcc:322106]	GO:0006468:protein phosphorylation;	-	GO:0004672:protein kinase activity;GO:0000166:nucleotide binding;GO:0005524:ATP binding;GO:0004674:protein serine/threonine kinase activity;
ENSDARG00000008372	3030	577	13.17	437	10.36	528	10.86	722	13.25	13	5870644	5937034	-	spred2b	sprouty related EVH1 domain containing 2b [Source:NCBI gene%3BAcc:793290]	GO:0007275:multicellular organismal development;GO:0009966:regulation of signal transduction;	GO:0016020:membrane;	-
ENSDARG00000008377	8415	2561	21.05	2330	19.89	2742	20.31	3285	21.71	3	39656188	39690218	+	epn2	epsin 2 [Source:ZFIN%3BAcc:ZDB-GENE-071212-1]	-	-	-
ENSDARG00000008380	2077	1520	50.63	1415	48.93	1708	51.26	1943	52.03	7	37742299	37755346	+	brd7	bromodomain containing 7 [Source:ZFIN%3BAcc:ZDB-GENE-040426-2687]	-	-	-
ENSDARG00000008383	1687	3809	156.2	3410	145.19	3942	145.65	4594	151.47	3	40796110	40804455	+	arpc1a	actin related protein 2/3 complex%2C subunit 1A [Source:ZFIN%3BAcc:ZDB-GENE-040116-1]	-	-	-
ENSDARG00000008384	4234	480	7.84	425	7.21	534	7.86	587	7.71	8	7393435	7444390	-	hdac6	histone deacetylase 6 [Source:ZFIN%3BAcc:ZDB-GENE-030131-3232]	-	-	-
ENSDARG00000008388	4473	805	12.45	861	13.83	908	12.65	1220	15.17	2	38161318	38183641	+	mmp14b	matrix metallopeptidase 14b (membrane-inserted) [Source:ZFIN%3BAcc:ZDB-GENE-030901-2]	GO:0060027:convergent extension involved in gastrulation;GO:0009948:anterior/posterior axis specification;GO:0030010:establishment of cell polarity;GO:0042074:cell migration involved in gastrulation;GO:0006508:proteolysis;GO:0051216:cartilage development;	GO:0031012:extracellular matrix;	GO:0004222:metalloendopeptidase activity;GO:0005509:calcium ion binding;GO:0008270:zinc ion binding;
ENSDARG00000008395	5312	297	3.87	342	4.62	391	4.59	369	3.86	25	6432578	6448050	-	snupn	snurportin 1 [Source:ZFIN%3BAcc:ZDB-GENE-030131-3464]	GO:0006606:protein import into nucleus;GO:0006370:7-methylguanosine mRNA capping;GO:0061015:snRNA import into nucleus;	GO:0005737:cytoplasm;GO:0005634:nucleus;	GO:0008565:protein transporter activity;GO:0004484:mRNA guanylyltransferase activity;
ENSDARG00000008396	1912	90	3.26	86	3.23	82	2.67	126	3.67	2	47916204	47923803	-	ftr24	finTRIM family%2C member 24 [Source:ZFIN%3BAcc:ZDB-GENE-050731-2]	-	GO:0005622:intracellular;	GO:0008270:zinc ion binding;
ENSDARG00000008398	6852	52	0.53	38	0.4	57	0.52	58	0.47	4	20318127	20474972	+	cacna1c	calcium channel%2C voltage-dependent%2C L type%2C alpha 1C subunit [Source:ZFIN%3BAcc:ZDB-GENE-020129-1]	GO:0008016:regulation of heart contraction;GO:0034765:regulation of ion transmembrane transport;GO:0070588:calcium ion transmembrane transport;GO:0003007:heart morphogenesis;	GO:0005891:voltage-gated calcium channel complex;	GO:0005245:voltage-gated calcium channel activity;
ENSDARG00000008403	2098	1161	38.28	1125	38.52	1191	35.39	1267	33.59	3	15805917	15811037	+	phospho1	phosphoethanolamine/phosphocholine phosphatase 1 [Source:NCBI gene%3BAcc:100002812]	GO:0008152:metabolic process;GO:0030500:regulation of bone mineralization;	-	GO:0016791:phosphatase activity;GO:0046872:metal ion binding;
ENSDARG00000008407	2891	385	9.21	398	9.89	546	11.77	567	10.91	22	11440705	11493236	-	tspan7b	tetraspanin 7b [Source:ZFIN%3BAcc:ZDB-GENE-040927-5]	-	GO:0016021:integral component of membrane;	-
ENSDARG00000008413	11102	481	3	390	2.52	518	2.91	676	3.39	1	46263473	46401385	-	atp11a	ATPase phospholipid transporting 11A [Source:ZFIN%3BAcc:ZDB-GENE-090311-52]	-	-	-
ENSDARG00000008414	2043	22	0.74	23	0.81	26	0.79	33	0.9	5	36752943	36763394	+	exoc3l2a	exocyst complex component 3-like 2a [Source:ZFIN%3BAcc:ZDB-GENE-060526-343]	GO:0006887:exocytosis;	GO:0000145:exocyst;	-
ENSDARG00000008433	3834	4986	89.97	4910	91.99	6002	97.58	6795	98.58	8	11204059	11229523	-	unc45b	unc-45 myosin chaperone B [Source:NCBI gene%3BAcc:266640]	GO:0048738:cardiac muscle tissue development;GO:0030239:myofibril assembly;GO:0007519:skeletal muscle tissue development;	GO:0030018:Z disc;GO:0048471:perinuclear region of cytoplasm;	GO:0005515:protein binding;
ENSDARG00000008434	2198	736	23.16	619	20.23	715	20.28	760	19.23	23	18953870	18982499	-	bcl2l1	BCL2 like 1 [Source:ZFIN%3BAcc:ZDB-GENE-010730-1]	GO:0030878:thyroid gland development;GO:0043154:negative regulation of cysteine-type endopeptidase activity involved in apoptotic process;GO:0001894:tissue homeostasis;GO:2001243:negative regulation of intrinsic apoptotic signaling pathway;GO:0043066:negative regulation of apoptotic process;	-	GO:0043027:cysteine-type endopeptidase inhibitor activity involved in apoptotic process;
ENSDARG00000008439	1717	105	4.23	108	4.52	116	4.21	113	3.66	4	18720785	18742106	-	atxn10	ataxin 10 [Source:ZFIN%3BAcc:ZDB-GENE-060503-180]	-	-	-
ENSDARG00000008447	2329	1730	51.39	1864	57.49	2021	54.09	2425	57.91	18	6536293	6550378	+	fkbp4	FKBP prolyl isomerase 4 [Source:ZFIN%3BAcc:ZDB-GENE-030131-514]	GO:0006457:protein folding;GO:0000413:protein peptidyl-prolyl isomerization;	GO:0016020:membrane;	GO:0003755:peptidyl-prolyl cis-trans isomerase activity;GO:0005528:FK506 binding;
ENSDARG00000008450	5078	19	0.26	29	0.41	21	0.26	38	0.42	2	8031234	8050498	+	pcolce2a	procollagen C-endopeptidase enhancer 2a [Source:ZFIN%3BAcc:ZDB-GENE-070705-25]	-	-	-
ENSDARG00000008454	3572	11	0.21	14	0.28	7	0.12	15	0.23	7	48240707	48251235	-	cpeb1b	cytoplasmic polyadenylation element binding protein 1b [Source:NCBI gene%3BAcc:30702]	GO:0006397:mRNA processing;GO:0006417:regulation of translation;	GO:0005737:cytoplasm;	GO:0003723:RNA binding;GO:0000166:nucleotide binding;
ENSDARG00000008457	2352	9	0.26	8	0.24	14	0.37	6	0.14	1	40237276	40258430	+	faah2a	fatty acid amide hydrolase 2a [Source:NCBI gene%3BAcc:436973]	-	GO:0016021:integral component of membrane;	GO:0016787:hydrolase activity;GO:0016884:carbon-nitrogen ligase activity, with glutamine as amido-N-donor;
ENSDARG00000008461	4174	435	7.21	421	7.24	441	6.59	509	6.78	8	40185600	40205712	-	anapc5	anaphase promoting complex subunit 5 [Source:ZFIN%3BAcc:ZDB-GENE-030131-1574]	-	-	-
ENSDARG00000008472	3390	101	2.06	99	2.1	113	2.08	139	2.28	8	22509508	22515042	-	apex2	APEX nuclease (apurinic/apyrimidinic endonuclease) 2 [Source:ZFIN%3BAcc:ZDB-GENE-040426-835]	GO:0006281:DNA repair;	GO:0005622:intracellular;	GO:0004519:endonuclease activity;GO:0003677:DNA binding;GO:0008270:zinc ion binding;
ENSDARG00000008473	2784	0	0	1	0.03	1	0.02	1	0.02	11	42585138	42599018	+	asb14a	ankyrin repeat and SOCS box containing 14a [Source:ZFIN%3BAcc:ZDB-GENE-140106-2]	-	-	-
ENSDARG00000008480	2760	537	13.46	485	12.62	559	12.62	633	12.76	13	15701596	15750103	+	trmt61a	tRNA methyltransferase 61A [Source:ZFIN%3BAcc:ZDB-GENE-040718-5]	GO:0030488:tRNA methylation;	GO:0031515:tRNA (m1A) methyltransferase complex;	GO:0016429:tRNA (adenine-N1-)-methyltransferase activity;
ENSDARG00000008485	4607	200	3	170	2.65	176	2.38	238	2.87	7	38278860	38310177	+	lrp3	low density lipoprotein receptor-related protein 3 [Source:ZFIN%3BAcc:ZDB-GENE-080116-3]	-	-	-
ENSDARG00000008487	12133	1054	6.01	958	5.67	1040	5.34	1404	6.44	1	10824351	11075405	-	dmd	dystrophin [Source:ZFIN%3BAcc:ZDB-GENE-010426-1]	GO:0048741:skeletal muscle fiber development;GO:0061053:somite development;GO:0007525:somatic muscle development;GO:0045214:sarcomere organization;GO:0016203:muscle attachment;	GO:0042383:sarcolemma;GO:0016010:dystrophin-associated glycoprotein complex;	GO:0003779:actin binding;GO:0005509:calcium ion binding;GO:0008270:zinc ion binding;GO:0046872:metal ion binding;
ENSDARG00000008490	2156	875	28.08	791	26.35	843	24.37	956	24.66	1	53865677	53880639	-	ltv1	LTV1 ribosome biogenesis factor [Source:NCBI gene%3BAcc:436587]	-	-	-
ENSDARG00000008491	4418	14	0.22	16	0.26	24	0.34	24	0.3	7	30178253	30191357	+	si:ch211-107o10.3	si:ch211-107o10.3 [Source:ZFIN%3BAcc:ZDB-GENE-030131-4716]	GO:0008152:metabolic process;	-	GO:0016491:oxidoreductase activity;GO:0000166:nucleotide binding;
ENSDARG00000008494	2836	1235	30.13	1461	37	1657	36.42	1433	28.11	6	39874177	39893526	-	myl6	myosin%2C light chain 6%2C alkali%2C smooth muscle and non-muscle [Source:ZFIN%3BAcc:ZDB-GENE-041010-28]	-	-	GO:0005509:calcium ion binding;
ENSDARG00000008502	1222	1413	79.99	1490	87.58	1500	76.51	1904	86.66	13	1125185	1130096	-	pno1	partner of NOB1 homolog [Source:NCBI gene%3BAcc:393520]	-	GO:0005730:nucleolus;	GO:0003723:RNA binding;
ENSDARG00000008503	2733	80	2.03	75	1.97	75	1.71	82	1.67	19	25352289	25427255	-	glcci1a	glucocorticoid induced 1a [Source:ZFIN%3BAcc:ZDB-GENE-031010-41]	GO:0072015:glomerular visceral epithelial cell development;GO:0003094:glomerular filtration;	GO:0005737:cytoplasm;	-
ENSDARG00000008540	1367	405	20.5	372	19.55	412	18.79	535	21.77	9	53276356	53277722	+	sox21b	SRY-box transcription factor 21b [Source:NCBI gene%3BAcc:406246]	GO:0000122:negative regulation of transcription from RNA polymerase II promoter;	GO:0005634:nucleus;	GO:0043565:sequence-specific DNA binding;
ENSDARG00000008541	2289	3	0.09	4	0.13	4	0.11	4	0.1	23	17926279	17933143	+	chia.4	chitinase%2C acidic.4 [Source:ZFIN%3BAcc:ZDB-GENE-030131-9279]	GO:0005975:carbohydrate metabolic process;GO:0006032:chitin catabolic process;	GO:0005576:extracellular region;	GO:0004568:chitinase activity;GO:0008061:chitin binding;
ENSDARG00000008542	4246	655	10.67	633	10.71	651	9.56	844	11.06	11	37708384	37720266	-	yod1	YOD1 deubiquitinase [Source:NCBI gene%3BAcc:550411]	GO:0030433:ER-associated ubiquitin-dependent protein catabolic process;GO:0006520:cellular amino acid metabolic process;GO:0070536:protein K63-linked deubiquitination;GO:0030968:endoplasmic reticulum unfolded protein response;GO:0071108:protein K48-linked deubiquitination;	-	GO:0046872:metal ion binding;GO:0004843:ubiquitin-specific protease activity;
ENSDARG00000008548	3954	246	4.3	222	4.03	228	3.59	327	4.6	2	43749221	43797218	+	arhgap12a	Rho GTPase activating protein 12a [Source:ZFIN%3BAcc:ZDB-GENE-050809-38]	GO:0007165:signal transduction;	GO:0005622:intracellular;	GO:0005543:phospholipid binding;
ENSDARG00000008551	1277	1105	59.86	1000	56.25	1234	60.23	1410	61.42	5	32888119	32890807	-	pole3	polymerase (DNA directed)%2C epsilon 3 (p17 subunit) [Source:ZFIN%3BAcc:ZDB-GENE-040426-1773]	-	GO:0005634:nucleus;	GO:0046982:protein heterodimerization activity;GO:0043565:sequence-specific DNA binding;
ENSDARG00000008553	2550	2	0.05	0	0	5	0.12	9	0.2	17	3124129	3166898	+	zgc:136872	zgc:136872 [Source:ZFIN%3BAcc:ZDB-GENE-060421-5204]	GO:0006508:proteolysis;	GO:0005622:intracellular;	GO:0004198:calcium-dependent cysteine-type endopeptidase activity;GO:0005509:calcium ion binding;
ENSDARG00000008560	1984	170	5.93	178	6.44	186	5.84	271	7.6	10	3336772	3359189	+	brap	BRCA1 associated protein [Source:ZFIN%3BAcc:ZDB-GENE-040718-168]	-	-	GO:0008270:zinc ion binding;GO:0000166:nucleotide binding;
ENSDARG00000008568	2461	743	20.89	671	19.58	828	20.97	931	21.04	20	34653916	34670236	-	slc25a24	solute carrier family 25 member 24 [Source:NCBI gene%3BAcc:447867]	GO:0055085:transmembrane transport;	GO:0005743:mitochondrial inner membrane;GO:0016021:integral component of membrane;	GO:0005509:calcium ion binding;
ENSDARG00000008573	2959	336	7.86	296	7.19	326	6.87	415	7.8	20	15857041	15922986	-	fam20b	FAM20B glycosaminoglycan xylosylkinase [Source:NCBI gene%3BAcc:557060]	GO:0030166:proteoglycan biosynthetic process;GO:0016310:phosphorylation;GO:0048701:embryonic cranial skeleton morphogenesis;	GO:0016021:integral component of membrane;GO:0000139:Golgi membrane;	GO:0005524:ATP binding;GO:0016301:kinase activity;
ENSDARG00000008575	8001	343	2.97	307	2.76	373	2.91	513	3.57	13	49867268	50002852	-	lyst	lysosomal trafficking regulator [Source:ZFIN%3BAcc:ZDB-GENE-070702-1]	-	-	-
ENSDARG00000008592	3569	447	8.66	391	7.87	511	8.92	576	8.98	5	22027588	22052852	-	mtmr8	myotubularin related protein 8 [Source:NCBI gene%3BAcc:393365]	GO:0016311:dephosphorylation;	GO:0005635:nuclear envelope;	GO:0004725:protein tyrosine phosphatase activity;
ENSDARG00000008593	7399	277	2.59	236	2.29	310	2.61	354	2.66	20	32838467	33174899	-	nbas	NBAS subunit of NRZ tethering complex [Source:NCBI gene%3BAcc:556592]	GO:0009790:embryo development;GO:0000184:nuclear-transcribed mRNA catabolic process, nonsense-mediated decay;	-	-
ENSDARG00000008623	1275	662	35.92	668	37.63	756	36.96	906	39.52	12	1455147	1467915	+	cops3	COP9 signalosome subunit 3 [Source:HGNC Symbol%3BAcc:HGNC:2239]	-	GO:0005737:cytoplasm;GO:0008180:COP9 signalosome;	-
ENSDARG00000008637	4907	1338	18.86	1329	19.45	1399	17.77	1304	14.78	1	12105901	12126625	-	mttp	microsomal triglyceride transfer protein [Source:NCBI gene%3BAcc:406207]	GO:0006629:lipid metabolic process;GO:0001579:medium-chain fatty acid transport;GO:0015909:long-chain fatty acid transport;GO:0007586:digestion;GO:0002040:sprouting angiogenesis;	-	GO:0005319:lipid transporter activity;
ENSDARG00000008639	3648	269	5.1	251	4.94	269	4.6	295	4.5	20	34420623	34453623	-	kifap3a	kinesin-associated protein 3a [Source:ZFIN%3BAcc:ZDB-GENE-040912-74]	-	-	-
ENSDARG00000008660	4572	366	5.54	396	6.22	445	6.07	498	6.06	7	18617982	18656069	-	coro1b	coronin%2C actin binding protein%2C 1B [Source:ZFIN%3BAcc:ZDB-GENE-040123-3]	-	-	-
ENSDARG00000008662	6511	114	1.21	108	1.19	125	1.2	136	1.16	9	50599362	50755669	+	fign	fidgetin [Source:NCBI gene%3BAcc:553599]	-	-	GO:0017111:nucleoside-triphosphatase activity;GO:0005524:ATP binding;
ENSDARG00000008678	1903	922	33.52	843	31.82	960	31.45	932	27.24	20	32406011	32432871	+	snx3	sorting nexin 3 [Source:ZFIN%3BAcc:ZDB-GENE-030131-921]	GO:0007154:cell communication;	-	GO:0035091:phosphatidylinositol binding;
ENSDARG00000008697	7075	1440	14.08	1358	13.79	1837	16.18	1915	15.06	12	25775734	25830268	+	epas1a	endothelial PAS domain protein 1a [Source:ZFIN%3BAcc:ZDB-GENE-030131-4490]	-	-	-
ENSDARG00000008703	2238	482	14.9	496	15.92	838	23.34	849	21.1	8	53747925	53773539	-	apeh	acylaminoacyl-peptide hydrolase [Source:ZFIN%3BAcc:ZDB-GENE-030131-9870]	GO:0006508:proteolysis;	-	GO:0004252:serine-type endopeptidase activity;
ENSDARG00000008706	1821	2979	113.17	3101	122.32	3213	109.98	3691	112.74	1	41465771	41472087	+	paip2b	poly(A) binding protein interacting protein 2B [Source:ZFIN%3BAcc:ZDB-GENE-040426-1736]	-	-	-
ENSDARG00000008720	3455	315	6.31	294	6.11	308	5.56	388	6.25	4	12612145	12679293	+	lmo3	LIM domain only 3 [Source:NCBI gene%3BAcc:553774]	-	-	GO:0008270:zinc ion binding;
ENSDARG00000008723	3024	344	7.87	297	7.05	345	7.11	445	8.19	1	9004719	9064912	+	prkcba	protein kinase C%2C beta a [Source:ZFIN%3BAcc:ZDB-GENE-040426-1354]	GO:0035556:intracellular signal transduction;GO:0006468:protein phosphorylation;	-	GO:0004697:protein kinase C activity;GO:0005524:ATP binding;GO:0008270:zinc ion binding;
ENSDARG00000008727	1986	53	1.85	43	1.56	40	1.26	77	2.16	11	6295370	6316718	+	ranbp3a	RAN binding protein 3a [Source:ZFIN%3BAcc:ZDB-GENE-040426-1132]	GO:0046907:intracellular transport;	-	-
ENSDARG00000008732	2372	529	15.43	431	13.05	601	15.79	679	15.92	6	46736251	46742455	-	zgc:66479	zgc:66479 [Source:ZFIN%3BAcc:ZDB-GENE-031030-10]	-	-	-
ENSDARG00000008735	2175	595	18.92	502	16.58	671	19.23	665	17.01	22	11123487	11137268	-	atp6ap2	ATPase H+ transporting accessory protein 2 [Source:ZFIN%3BAcc:ZDB-GENE-040426-1960]	GO:0035622:intrahepatic bile duct development;	GO:0016021:integral component of membrane;	GO:0004872:receptor activity;
ENSDARG00000008740	2840	925	22.53	1049	26.53	1101	24.17	1233	24.15	1	51202984	51219965	-	esf1	ESF1%2C nucleolar pre-rRNA processing protein%2C homolog (S. cerevisiae) [Source:ZFIN%3BAcc:ZDB-GENE-030131-4917]	-	-	-
ENSDARG00000008748	1795	2448	94.35	2347	93.92	2833	98.38	3094	95.87	18	15778110	15793163	+	ube2na	ubiquitin-conjugating enzyme E2Na [Source:ZFIN%3BAcc:ZDB-GENE-040426-2873]	GO:0000209:protein polyubiquitination;GO:0042769:DNA damage response, detection of DNA damage;GO:0033182:regulation of histone ubiquitination;GO:0000724:double-strand break repair via homologous recombination;GO:0043123:positive regulation of I-kappaB kinase/NF-kappaB signaling;GO:0031058:positive regulation of histone modification;GO:0050852:T cell receptor signaling pathway;GO:0051443:positive …	GO:0031372:UBC13-MMS2 complex;GO:0005634:nucleus;	GO:0043130:ubiquitin binding;GO:0016881:acid-amino acid ligase activity;
ENSDARG00000008757	1677	697	28.75	622	26.64	731	27.17	911	30.22	17	21102301	21123575	+	entpd6	ectonucleoside triphosphate diphosphohydrolase 6 [Source:ZFIN%3BAcc:ZDB-GENE-050417-412]	-	-	GO:0016787:hydrolase activity;
ENSDARG00000008765	2394	237	6.85	257	7.71	303	7.89	393	9.13	20	14789148	14806671	+	tmed5	transmembrane p24 trafficking protein 5 [Source:ZFIN%3BAcc:ZDB-GENE-040426-1302]	GO:0006810:transport;	GO:0016021:integral component of membrane;	-
ENSDARG00000008767	3522	100	1.96	172	3.51	132	2.34	118	1.86	22	21672656	21755966	-	tle2b	TLE family member 2%2C transcriptional corepressor b [Source:ZFIN%3BAcc:ZDB-GENE-050208-677]	-	-	-
ENSDARG00000008772	3779	663	12.14	614	11.67	738	12.17	634	9.33	6	21470261	21492752	-	cacng1a	calcium channel%2C voltage-dependent%2C gamma subunit 1a [Source:ZFIN%3BAcc:ZDB-GENE-030131-732]	GO:0070588:calcium ion transmembrane transport;	GO:0005891:voltage-gated calcium channel complex;	GO:0005245:voltage-gated calcium channel activity;
ENSDARG00000008784	3153	788	17.29	631	14.37	782	15.46	972	17.15	2	32812402	32826108	-	prpf4ba	pre-mRNA processing factor 4Ba [Source:ZFIN%3BAcc:ZDB-GENE-040426-947]	-	-	-
ENSDARG00000008785	1806	1899	72.74	1914	76.12	2249	77.62	2361	72.72	25	26877705	26893006	-	dldh	dihydrolipoamide dehydrogenase [Source:ZFIN%3BAcc:ZDB-GENE-040120-4]	GO:0045454:cell redox homeostasis;GO:0055114:oxidation-reduction process;	GO:0005737:cytoplasm;	GO:0050660:flavin adenine dinucleotide binding;GO:0004148:dihydrolipoyl dehydrogenase activity;
ENSDARG00000008788	5192	78	1.04	65	0.9	153	1.84	93	1	23	39558508	39597901	+	camk1gb	calcium/calmodulin-dependent protein kinase IGb [Source:ZFIN%3BAcc:ZDB-GENE-040426-1694]	GO:0006468:protein phosphorylation;	-	GO:0005524:ATP binding;GO:0004674:protein serine/threonine kinase activity;
ENSDARG00000008790	1622	14	0.6	13	0.58	13	0.5	13	0.45	24	7294929	7321934	-	actr3b	actin related protein 3B [Source:ZFIN%3BAcc:ZDB-GENE-070424-10]	-	-	-
ENSDARG00000008796	1326	76	3.97	98	5.31	59	2.77	94	3.94	14	30543008	30544666	+	her5	hairy-related 5 [Source:ZFIN%3BAcc:ZDB-GENE-990415-90]	GO:0007492:endoderm development;GO:0030917:midbrain-hindbrain boundary development;GO:0048562:embryonic organ morphogenesis;GO:0006355:regulation of transcription, DNA-templated;GO:0045737:positive regulation of cyclin-dependent protein serine/threonine kinase activity;GO:0050768:negative regulation of neurogenesis;	GO:0005634:nucleus;	GO:0046982:protein heterodimerization activity;GO:0003677:DNA binding;GO:0003700:sequence-specific DNA binding transcription factor activity;GO:0042803:protein homodimerization activity;
ENSDARG00000008803	4105	10028	169	10082	176.41	11386	172.89	12401	168.03	17	15534815	15539701	+	marcksb	myristoylated alanine-rich protein kinase C substrate b [Source:ZFIN%3BAcc:ZDB-GENE-030131-1921]	GO:0016310:phosphorylation;	-	GO:0016301:kinase activity;GO:0005516:calmodulin binding;
ENSDARG00000008805	2506	819	22.61	717	20.55	904	22.49	981	21.77	17	49313504	49339681	-	orc3	origin recognition complex%2C subunit 3 [Source:ZFIN%3BAcc:ZDB-GENE-030131-6247]	GO:0006260:DNA replication;	GO:0005664:nuclear origin of replication recognition complex;	GO:0003677:DNA binding;
ENSDARG00000008807	1509	62	2.84	48	2.28	51	2.11	49	1.81	2	22640215	22650435	+	bokb	BCL2 family apoptosis regulator BOK b [Source:NCBI gene%3BAcc:394160]	GO:0043065:positive regulation of apoptotic process;	-	-
ENSDARG00000008808	6077	268	3.05	247	2.92	258	2.65	250	2.29	15	28874441	28908027	-	eml2	EMAP like 2 [Source:ZFIN%3BAcc:ZDB-GENE-050706-71]	-	-	-
ENSDARG00000008811	1705	130	5.27	102	4.3	103	3.77	130	4.24	7	44608224	44621281	+	cmtm3	CKLF-like MARVEL transmembrane domain containing 3 [Source:ZFIN%3BAcc:ZDB-GENE-040801-206]	-	-	-
ENSDARG00000008816	2482	1060	29.54	963	27.87	1197	30.06	1127	25.26	13	22679084	22699024	-	glud1a	glutamate dehydrogenase 1a [Source:ZFIN%3BAcc:ZDB-GENE-030114-2]	-	-	-
ENSDARG00000008818	4030	453	7.78	367	6.54	495	7.66	677	9.34	19	3056450	3082268	+	hsf1	heat shock transcription factor 1 [Source:ZFIN%3BAcc:ZDB-GENE-000616-16]	GO:0006355:regulation of transcription, DNA-templated;GO:0009408:response to heat;GO:0002088:lens development in camera-type eye;	GO:0005634:nucleus;	GO:0043565:sequence-specific DNA binding;GO:0003700:sequence-specific DNA binding transcription factor activity;
ENSDARG00000008829	1740	63	2.5	68	2.81	90	3.22	103	3.29	20	27020201	27045991	+	chga	chromogranin A [Source:ZFIN%3BAcc:ZDB-GENE-041010-161]	-	GO:0030141:secretory granule;	-
ENSDARG00000008832	1636	451	19.07	411	18.04	516	19.66	594	20.2	19	26810208	26823709	-	neu1	neuraminidase 1 [Source:ZFIN%3BAcc:ZDB-GENE-060503-592]	-	GO:0005764:lysosome;	GO:0004308:exo-alpha-sialidase activity;
ENSDARG00000008835	4813	27	0.39	19	0.28	24	0.31	15	0.17	3	3432960	3448095	-	si:dkey-46g23.5	si:dkey-46g23.5 [Source:ZFIN%3BAcc:ZDB-GENE-030131-9306]	-	GO:0005615:extracellular space;	GO:0004866:endopeptidase inhibitor activity;
ENSDARG00000008840	2600	820	21.82	819	22.63	818	19.61	899	19.23	5	30518036	30534426	+	hmbsa	hydroxymethylbilane synthase a [Source:ZFIN%3BAcc:ZDB-GENE-040426-1375]	-	-	-
[truncated: 30,576 more rows]
