# Supplementary material for: HoxB-derived hoxba and hoxbb clusters are essential for the anterior–posterior positioning of zebrafish pectoral fins
Source: eLife. 2025 Nov 21;14:RP105889. doi: 10.7554/eLife.105889 (PMC12638046; doi:10.7554/eLife.105889)
Supplement: Figure 5—source data 1. [file elife-105889-fig5-data1.xlsx]

## Sheet: hox genes
Raldh2-1_FPKM	Raldh2-2_FPKM	Sibling-1_FPKM	Sibling-2_FPKM	GeneSymbol		Raldh2_averageFP		Sibling_averageFP
15.14	15.33	11.15	13.12	hoxa10b		15.235		12.135
4.32	4.42	3.77	3.32	hoxa11a		4.37		3.545
12.89	13.69	11.68	10.28	hoxa11b		13.29		10.98
3.69	3.62	2.91	3.63	hoxa13a		3.655		3.27
2.86	4.32	2.9	2.27	hoxa13b		3.59		2.585
1.06	1.3	2.51	2.93	hoxa1a		1.18		2.72
14.53	13.92	11.01	11.36	hoxa2b		14.225		11.185
10.63	9.28	18.52	19.86	hoxa3a		9.955		19.19
10.63	9.28	18.52	19.86	hoxa4a		9.955		19.19
4.99	5.9	12.85	10.08	hoxa5a		5.445		11.465
13.21	13.41	14.64	13.85	hoxa9a		13.31		14.245
21.75	20.13	14.55	15.51	hoxa9b		20.94		15.03
16.6	16.22	15.09	14.17	hoxb10a		16.41		14.63
3.61	3.07	2.88	3.19	hoxb13a		3.34		3.035
4.68	5.24	8.36	10.78	hoxb1a		4.96		9.57
16.28	14.8	34.12	37.61	hoxb1b		15.54		35.865
9.36	8.74	10.62	9.05	hoxb2a		9.05		9.835
14.53	14.11	19.51	21.63	hoxb3a		14.32		20.57
8.8	7.31	16.42	21.9	hoxb4a		8.055		19.16
3.32	3.57	11.18	9.63	hoxb5a		3.445		10.405
1.32	0.71	13.61	14.64	hoxb5b		1.015		14.125
9.3	9.88	16.58	15.52	hoxb6a		9.59		16.05
1.16	1.74	11.22	10.2	hoxb6b		1.45		10.71
13.28	14.06	14.11	13.4	hoxb7a		13.67		13.755
10.28	10.48	18.01	19.07	hoxb8a		10.38		18.54
2.99	3.43	17.92	20.53	hoxb8b		3.21		19.225
26.15	27.2	30.36	28.62	hoxb9a		26.675		29.49
8.24	7.27	6.13	6.44	hoxc10a		7.755		6.285
6.46	5.98	3.89	4.43	hoxc11a		6.22		4.16
2.56	2.48	1.58	1.97	hoxc11b		2.52		1.775
37.15	28.73	26.29	25.22	hoxc12a		32.94		25.755
4.93	4.89	4.75	3.69	hoxc12b		4.91		4.22
15.42	15.64	14.43	12.83	hoxc13a		15.53		13.63
1.93	2.49	1.99	1.98	hoxc13b		2.21		1.985
0.61	0.75	7.49	6.79	hoxc1a		0.68		7.14
11.78	11.59	16.59	15.21	hoxc3a		11.685		15.9
2.56	1.73	8.91	9.87	hoxc4a		2.145		9.39
2.1	3.01	5.28	7.39	hoxc5a		2.555		6.335
10.51	8.25	15.89	17.49	hoxc6a		9.38		16.69
13.59	15.97	13.82	17.31	hoxc6b		14.78		15.565
25.49	25.74	29.91	31.47	hoxc8a		25.615		30.69
19.69	18.48	16.62	18.64	hoxc9a		19.085		17.63
10.94	11.14	8.54	9.98	hoxd10a		11.04		9.26
6.48	5.86	5.04	6.63	hoxd11a		6.17		5.835
8.4	10.42	8.31	8.03	hoxd12a		9.41		8.17
2.38	1.36	2.25	2.18	hoxd13a		1.87		2.215
9.08	9.72	8.69	9.47	hoxd3a		9.4		9.08
6.5	7.09	10.41	11.94	hoxd4a		6.795		11.175
11.7	12.35	8.68	9.84	hoxd9a		12.025		9.26
