# Supplementary material for: HoxB-derived hoxba and hoxbb clusters are essential for the anterior–posterior positioning of zebrafish pectoral fins
Source: eLife. 2025 Nov 21;14:RP105889. doi: 10.7554/eLife.105889 (PMC12638046; doi:10.7554/eLife.105889)
Supplement: Supplementary file 1. — The DNA sequences of hoxb5b, hoxb6b, and hoxb8b were analyzed in 2 dpf embryos apparently lacking pectoral fins. Among the CRISPR–Cas9-induced mutations, those resulting in frameshifts are highlighted in blue. [file elife-105889-supp1.xlsx]

## Sheet: Supplementary File 1
Supplementary File 1. The frameshift mutations introduced in hoxbb genes in the embryos lacking pectoral fins during the screening
No	Phenotype	Parents (male)	Parents (female)	hoxba	hoxbb	hoxb5b	hoxb6b	hoxb8b
1	No pectoral fin	hoxba+/-;hoxbb+/-	hoxba+/-;b5b, b6b, b8b gRNA-injected	-/-	+/-	frameshift (2bp ins)	frameshift (1bp ins)	frameshift (5bp del)
2	No pectoral fin	hoxba+/-;hoxbb+/-	hoxba+/-;b5b, b6b, b8b gRNA-injected	-/-	+/-	frameshift (5bp del)	frameshift (10bp del)	frameshift (1bp del)
3	No pectoral fin	hoxba+/-;hoxbb+/-	hoxba+/-;b5b, b6b, b8b gRNA-injected	-/-	+/-	frameshift (2bp ins)	18bp del + 9bp insert	frameshift (5bp del)
4	No pectoral fin	hoxba+/-;hoxbb+/-	hoxba+/-;b5b, b6b, b8b gRNA-injected	-/-	+/-	frameshift (5bp del)	18bp del + 9bp insert	frameshift (2bp del)
5	No pectoral fin	hoxba+/-;hoxbb+/-	hoxba+/-;b5b, b6b, b8b gRNA-injected	-/-	+/-	frameshift (5bp del)	frameshift(10bp del)	No mutation
6	No pectoral fin	hoxba+/-;hoxbb+/-	hoxba+/-;b5b, b6b, b8b gRNA-injected	-/-	+/-	frameshift (5bp del)	frameshift(10bp del)	frameshift (1bp ins)
7	No pectoral fin	hoxba+/-;hoxbb+/-	hoxba+/-;b5b, b6b, b8b gRNA-injected	-/-	+/-	frameshift (5bp del)	frameshift(10bp del)	frameshift (1bp del)
8	No pectoral fin	hoxba+/-;hoxbb+/-	hoxba+/-;b5b, b6b, b8b gRNA-injected	-/-	+/-	frameshift (2bp ins)	frameshift (1bp insert)	frameshift (10bp del)
9	No pectoral fin	hoxba+/-;hoxbb+/-	hoxba+/-;b5b, b6b, b8b gRNA-injected	-/-	+/-	frameshift (2bp ins)	18bp del + 9bp ins	frameshift (5bp del)
10	No pectoral fin	hoxba+/-;hoxbb+/-	hoxba+/-;b5b, b6b, b8b gRNA-injected	-/-	+/-	frameshift (5bp del)	frameshift(10bp del)	frameshift (1bp ins)
11	No pectoral fin	hoxba+/-;hoxbb+/-	hoxba+/-;b5b, b6b, b8b gRNA-injected	-/-	+/-	frameshift (2bp ins)	18bp del + 9bp ins	frameshift (5bp del)
12	No pectoral fin	hoxba+/-;hoxbb+/-	hoxba+/-;b5b, b6b, b8b gRNA-injected	-/-	+/-	frameshift (5bp del)	frameshift(10bp del)	frameshift (1bp del)
13	No pectoral fin	hoxba+/-;hoxbb+/-	hoxba+/-;b5b, b6b, b8b gRNA-injected	-/-	+/-	frameshift (2bp ins)	No mutation	frameshift (5bp del)
14	No pectoral fin	hoxba+/-;hoxbb+/-	hoxba+/-;b5b, b6b, b8b gRNA-injected	-/-	+/-	frameshift (2bp ins)	No mutation	frameshift (10bp del)
15	No pectoral fin	hoxba+/-;hoxbb+/-	hoxba+/-;b5b, b6b, b8b gRNA-injected	-/-	+/-	frameshift (5bp del)	frameshift(10bp del)	frameshift (1bp ins)
16	No pectoral fin	hoxba+/-;hoxbb+/-	hoxba+/-;b5b gRNA-injected	-/-	+/-	frameshift (7bp del)	No mutation	No mutation
17	No pectoral fin	hoxba+/-;hoxbb+/-	hoxba+/-;b5b gRNA-injected	-/-	+/-	frameshift (7bp del)	No mutation	No mutation
18	No pectoral fin	hoxba+/-;hoxbb+/-	hoxba+/-;b5b gRNA-injected	-/-	+/-	frameshift (7bp del)	No mutation	No mutation
19	No pectoral fin	hoxba+/-;hoxbb+/-	hoxba+/-;b5b, b6b gRNA-injected	-/-	+/-	frameshift (2bp del + 72bp ins)	frameshift (3bp del + 10bp ins)	No mutation
20	No pectoral fin	hoxba+/-;hoxbb+/-	hoxba+/-;b5b, b6b gRNA-injected	-/-	+/-	frameshift (2bp del + 72bp ins)	frameshift (3bp del + 10bp ins)	No mutation
