# Supplementary material for: HoxB-derived hoxba and hoxbb clusters are essential for the anterior–posterior positioning of zebrafish pectoral fins
Source: eLife. 2025 Nov 21;14:RP105889. doi: 10.7554/eLife.105889 (PMC12638046; doi:10.7554/eLife.105889)
Supplement: Supplementary file 2. [file elife-105889-supp2.xlsx]

## Sheet:  Supplementary File 2
	Supplementary File 2. The sequences of primers used for the genotyping in this study
	Gene	Primer	Sequence	Reference
	hoxb4a	hoxb4a-s	5'-TCTAGCTTCTTCAATGTGTGGGGC-3'	Maeno et al., Development (2024)
		hoxb4a-as	5'-TTCTTCTGCGGGTCAGATAGCG-3'	Maeno et al., Development (2024)
	hoxb5a	hoxb5a-s	5'-TCTCACAGAGCGAACAACTC-3'	Maeno et al., Development (2024)
		hoxb5a-as	5'-GTAGTTTCCTCATCCAAGGG-3'	Maeno et al., Development (2024)
	hoxb5b	hoxb5b-s	5'-CAGATGAAACCAATGTCTCGTCCG-3'	Maeno et al., Development (2024)
		hoxb5b-as	5'-TACCATGGCTAATGTGCAGCTTCC-3'	Maeno et al., Development (2024)
	hoxb6b	hoxb6b-s	5'-CTATTGGAAGTCTGGAAGACTCGC-3'	Maeno et al., Development (2024)
		hoxb6b-as	5'-CGTTGACAGTCTCGTAGTGCTAAG-3'	Maeno et al., Development (2024)
	hoxb8b	hoxb8b-s	5'-GGGGAGTTGATCTTTCAAGCAATGA-3'	Yamada et al., Development (2021)
		hoxb8b-as	5'-GTGGTAGAAATCCGGGAACTGA-3'	Yamada et al., Development (2021)
	hoxb4a deletion	hoxb4a del-5'-s	5'-CGTGACTTTCTATGGAGCTGGT-3'	In this study
		hoxb4a del-5'-as	5'-CGATTCCCGGATAAGGAAATGG-3'	In this study
		hoxb4a del-3'-as	5'-CGGGATAAAATGGGAACCAGAC-3'	In this study
	hoxb5a deletion	hoxb5a del-5'-s	5'-CGAAGCAGCAATTGGCACTTTGTC-3'	In this study
		hoxb5a del-3'-s	5'-GAGAGTTAGCATGTGAGCTCTT-3'	In this study
		hoxb5a del-3'-as	5'-CAGAGGACCATGAAACATAGGC-3'	In this study
	hoxb5b deletion	hoxb5b del-5'-s	5'-GGCACCATTGAGTTGAACCAAACG-3'	In this study
		hoxb5b del-3'-s	5'-GTACAGTACAACTCGCACTACC-3'	In this study
		hoxb5b del-3'-as	5'-CATTTCCTCGCGATGCAGGTATC-3	In this study
	hoxb4a-b5a deletion	hoxb5a del-5'-s	5'-CGAAGCAGCAATTGGCACTTTGTC-3'	In this study
		hoxb4a del-3'-s	5'-GTAGAACGTGGATTTTACCCGC-3'	In this study
		hoxb4a del-3'-as	5'-CGGGATAAAATGGGAACCAGAC-3'	In this study
