# Supplementary material for: HoxB-derived hoxba and hoxbb clusters are essential for the anterior–posterior positioning of zebrafish pectoral fins
Source: eLife. 2025 Nov 21;14:RP105889. doi: 10.7554/eLife.105889 (PMC12638046; doi:10.7554/eLife.105889)
Supplement: Supplementary file 3. [file elife-105889-supp3.xlsx]

## Sheet:  Supplementary File 3
		Supplementary File 3. The target-specific sequences of crRNAs used in this study
		crRNA	Sequence	Reference
		hoxb4a	5'-GUUCACCCCCUGAAUAGUUC-3	Maeno et al., Development (2024)
		hoxb5a	5'-UAUUUGGGGAGCUUGGCCAU-3'	Maeno et al., Development (2024)
		hoxb5b	5'-UCGACUACAACACCUAACGA-3'	Maeno et al., Development (2024)
		hoxb6b	5'-CGGGUAAACCGGGGUACAUG-3	Maeno et al., Development (2024)
		hoxb8b	5'-UGACUGCCCAAGCUACACGC-3'	Yamada et al., Development (2021)
		hoxb4a deletion	5'-UUUUACCACUAUCUCAUCAA-3'	In this study
			5'-AAAGUACGAGCAAGAUGUGU-3'	In this study
		hoxb5a deletion	5'-UAGCACCAAUGAUAAGAUAU-3'	In this study
			5'-UAGAGCUUCACUUCAUACAA-3'	In this study
		hoxb5b deletion	5'-AAUUUACGACUGGUCAACAA-3'	In this study
			5'-GACGUUUCAAUACAAGUUCA-3'	In this study
		hoxb4a-b5a deletion	5'-UAGCACCAAUGAUAAGAUAU-3'	In this study
			5'-AAAGUACGAGCAAGAUGUGU-3'	In this study
		raldh2	5'-AAAAUAUUGACGACUCCCGG-3'	In this study
